# Supplementary material for: Dominant spinal muscular atrophy linked mutations in the cargo binding domain of BICD2 result in altered interactomes and dynein hyperactivity
Source: bioRxiv preprint, doi:10.1101/2025.05.13.653647, version 2 (2025-09-30)
Supplement: Supplemental table1 [file 653647_file14.xlsx]

## Sheet: RFP-Trbo vs Trbo-BicD
Protein IDs	Majority protein IDs	Protein names	Gene names	-Log Student's T-test p-value BicD2_Trbo_RFP-Trbo	log2 fold difference	Mol. weight [kDa]	Score	RFP-Trbo	BicD2_Trbo	RFP-Trbo	BicD2_Trbo	RFP-Trbo	BicD2_Trbo	Taxonomy IDs	Student's T-test Significant BicD2_Trbo_RFP-Trbo	Student's T-test significant	Peptides	Razor + unique peptides	Unique peptides	Intensity	iBAQ peptides	MS/MS count
P0DPI2;A0A0B4J2D5	P0DPI2;A0A0B4J2D5			0.914844	-1.02196	28.17	45.14	26.3175	24.8838	26.7781	26.5615	26.797	25.3814	-1			7	7	7	1128600000	15	36
Q8TD16;REV__Q13023	Q8TD16	Protein bicaudal D homolog 2	BICD2	5.73666	10.2918	93.532	323.31	27.1435	37.3605	27.5564	37.514	26.7316	37.4323	-1	+	BicD2_Trbo_RFP-Trbo	61	61	54	1508700000000	60	2318
A0JNW5	A0JNW5	UHRF1-binding protein 1-like	UHRF1BP1L	1.20178	0.661672	164.2	33.538	26.693	27.2328	27.1329	27.4776	26.2708	27.3714	-1			19	19	19	1352500000	91	58
Q6NW29	Q6NW29	RWD domain-containing protein 4	RWDD4	3.41003	5.15534	21.25	1.9399	21.8918	26.8879	22.5203	27.3146	21.0279	26.7036	-1	+	BicD2_Trbo_RFP-Trbo	1	1	1	1160500000	7	11
A1L0T0	A1L0T0	Acetolactate synthase-like protein	ILVBL	0.799246	-1.39814	67.867	4.0732	24.4122	21.4722	23.1247	23.4305	22.9593	21.3991	-1			4	4	4	194890000	29	5
O75962;O60229	O75962	Triple functional domain protein	TRIO	1.94691	4.56107	346.9	3.2653	22.9577	27.6229	21.7509	24.8635	21.9141	27.8194	-1	+	BicD2_Trbo_RFP-Trbo	4	4	4	530190000	163	6
A2RRP1	A2RRP1	Neuroblastoma-amplified sequence	NBAS	0.30407	0.210264	268.57	9.5356	23.7399	24.5315	23.696	23.6834	23.8698	23.7216	-1			6	6	6	172000000	129	10
A5YKK6	A5YKK6	CCR4-NOT transcription complex subunit 1	CNOT1	0.541552	0.0993366	266.94	323.31	30.7272	30.8085	30.6555	30.6312	30.5178	30.7588	-1			71	71	71	21584000000	132	678
P05166	P05166	Propionyl-CoA carboxylase beta chain, mitochondrial	PCCB	3.59303	4.38951	58.215	47.614	23.3777	27.0698	22.6616	26.9326	22.4727	27.6782	-1	+	BicD2_Trbo_RFP-Trbo	18	18	18	1560800000	35	80
A6ND91	A6ND91	Putative L-aspartate dehydrogenase	ASPDH	1.04019	0.757182	29.946	1.7673	22.7624	23.4063	23.442	23.7858	22.3293	23.6132	-1			1	1	1	49807000	14	7
A6NDG6	A6NDG6	Phosphoglycolate phosphatase	PGP	0.260212	-0.427242	34.006	7.2174	24.5289	23.0671	25.11	25.0919	24.553	24.7512	-1			4	4	4	274500000	19	8
A6NDU8	A6NDU8	UPF0600 protein C5orf51	C5orf51	0.260915	-0.489511	33.62	8.4303	24.3003	24.2777	25.1126	24.2959	23.309	22.6797	-1			3	3	3	212230000	18	12
A6NHL2	A6NHL2	Tubulin alpha chain-like 3	TUBAL3	0.0548651	-0.167083	49.908	5.4996	21.869	22.997	23.9736	24.3097	23.3542	21.3889	-1			4	2	2	190090000	25	8
A6NHQ2	A6NHQ2	rRNA/tRNA 2-O-methyltransferase fibrillarin-like protein 1	FBLL1	0.105092	0.282287	34.803	2.1787	23.7355	22.6743	23.7522	24.6028	21.5866	22.644	-1			3	2	2	161170000	23	13
P49754	P49754	Vacuolar protein sorting-associated protein 41 homolog	VPS41	4.03752	4.19057	98.565	23.958	21.6781	26.3066	22.1598	26.421	22.5754	26.2574	-1	+	BicD2_Trbo_RFP-Trbo	11	11	11	617180000	50	22
Q96G01	Q96G01	Protein bicaudal D homolog 1	BICD1	2.58765	4.16565	110.75	108.41	24.8658	28.4126	25.1285	28.5879	23.1575	28.6481	-1	+	BicD2_Trbo_RFP-Trbo	25	18	18	2348100000	65	91
A6ZKI3;Q9BWD3;Q17RB0	A6ZKI3;Q9BWD3	Protein FAM127A;Protein FAM127B	FAM127A;FAM127B	0.615156	-0.465218	13.171	1.9489	24.1832	23.4394	24.7893	24.3164	24.4875	24.3086	-1			3	3	3	224940000	8	11
Q96A26	Q96A26	Protein FAM162A	FAM162A	3.77498	3.83898	17.342	2.3511	22.4127	26.5654	22.4374	25.8457	21.9437	25.8997	-1	+	BicD2_Trbo_RFP-Trbo	1	1	1	512670000	10	2
P62308;A8MWD9	P62308;A8MWD9	Small nuclear ribonucleoprotein G;Putative small nuclear ribonucleoprotein G-like protein 15	SNRPG;SNRPGP15	0.0689529	-0.0975246	8.496	1.6326	23.1074	22.8782	22.0746	22.1707	23.3511	23.1916	-1			1	1	1	45715000	3	12
A8MXV4	A8MXV4	Nucleoside diphosphate-linked moiety X motif 19, mitochondrial	NUDT19	0.168804	-0.331539	42.233	11.326	24.9548	24.0057	26.2307	26.1714	25.529	25.5427	-1			8	8	8	649580000	19	24
B2RTY4	B2RTY4	Unconventional myosin-IXa	MYO9A	0.603755	-0.657961	292.7	1.5625	24.7146	24.0939	24.9178	24.7691	26.0735	24.8691	-1			2	2	2	341300000	160	3
C9JLW8	C9JLW8	Protein FAM195B	FAM195B	0.987653	-1.28848	10.92	5.9464	25.5088	22.9328	25.0162	24.6914	25.6309	24.6662	-1			2	2	2	320780000	9	15
E9PAV3;Q13765;Q9BZK3	E9PAV3;Q13765	Nascent polypeptide-associated complex subunit alpha, muscle-specific form;Nascent polypeptide-associated complex subunit alpha	NACA	0.744016	-0.654759	205.42	178.85	28.9773	28.0218	29.7464	29.1529	29.1946	28.7793	-1			5	5	5	6201700000	107	103
O95425	O95425	Supervillin	SVIL	1.63026	3.55908	247.74	15.442	24.1046	25.2808	23.7131	27.8799	22.2379	27.5722	-1	+	BicD2_Trbo_RFP-Trbo	11	11	11	1287300000	128	18
O00116	O00116	Alkyldihydroxyacetonephosphate synthase, peroxisomal	AGPS	0.804587	-0.779745	72.911	10.268	25.5994	24.7075	26.2004	25.7221	25.4403	24.4712	-1			6	6	6	557830000	39	23
O00139	O00139	Kinesin-like protein KIF2A	KIF2A	0.641225	-0.580435	79.954	6.2249	25.3417	25.216	25.1002	25.0795	25.6032	24.0083	-1			6	6	6	412080000	43	19
O00148	O00148	ATP-dependent RNA helicase DDX39A	DDX39A	0.471335	-0.851855	49.129	7.9106	24.6999	23.9029	26.3854	24.6234	25.9441	25.9475	-1			15	5	5	591790000	26	15
Q96AX1	Q96AX1	Vacuolar protein sorting-associated protein 33A	VPS33A	2.51948	3.49929	67.61	16.07	21.618	25.8194	22.0287	26.1035	23.3514	25.5731	-1	+	BicD2_Trbo_RFP-Trbo	9	9	9	368230000	41	16
O00154	O00154	Cytosolic acyl coenzyme A thioester hydrolase	ACOT7	0.106905	-0.150784	41.796	33.427	27.0809	26.8069	28.247	28.0833	27.7478	27.7332	-1			10	10	10	2656100000	21	111
Q9NSY0	Q9NSY0	Nuclear receptor-binding protein 2	NRBP2	2.55778	3.49574	57.802	1.574	23.1625	25.8756	21.4449	25.6956	21.892	25.4154	-1	+	BicD2_Trbo_RFP-Trbo	2	2	2	409180000	25	9
Q9NSA2	Q9NSA2	Potassium voltage-gated channel subfamily D member 1	KCND1	2.01	3.16249	71.33	1.8612	21.6965	25.9602	23.7142	25.2344	21.8453	25.5488	-1	+	BicD2_Trbo_RFP-Trbo	1	1	1	458240000	31	11
O00170	O00170	AH receptor-interacting protein	AIP	0.41822	-0.32782	37.636	8.374	25.153	24.7585	25.9775	25.539	25.408	25.2575	-1			3	3	3	475850000	23	25
Q9P253	Q9P253	Vacuolar protein sorting-associated protein 18 homolog	VPS18	2.36997	3.1192	110.18	16.842	22.1106	25.5754	23.5012	25.3226	21.9456	26.017	-1	+	BicD2_Trbo_RFP-Trbo	7	7	7	389510000	54	21
O00186	O00186	Syntaxin-binding protein 3	STXBP3	0.429323	-0.450692	67.764	1.6266	22.4609	21.3234	22.8005	22.7191	22.6683	22.5351	-1			1	1	1	62690000	37	3
O00193	O00193	Small acidic protein	SMAP	0.792985	-0.976168	20.332	11.715	25.0207	23.0764	25.3849	24.4521	24.9716	24.9201	-1			2	2	2	328950000	8	8
P53350	P53350	Serine/threonine-protein kinase PLK1	PLK1	3.32724	3.09394	68.254	276.39	27.5725	30.8687	28.3546	30.8568	27.3915	30.8749	-1	+	BicD2_Trbo_RFP-Trbo	24	24	24	19133000000	36	409
Q96JN8	Q96JN8	Neuralized-like protein 4	NEURL4	3.58677	3.08337	166.9	70.107	25.0332	27.7114	24.2857	27.6761	24.3176	27.4991	-1	+	BicD2_Trbo_RFP-Trbo	24	24	24	2153300000	66	111
O00214	O00214	Galectin-8	LGALS8	0.75639	-0.408183	35.808	11.942	26.6099	25.9862	25.8185	25.8125	26.2487	25.6538	-1			6	6	6	889720000	20	29
O00231	O00231	26S proteasome non-ATPase regulatory subunit 11	PSMD11	0.927228	-0.564301	47.463	50.666	28.5924	27.9858	28.9083	28.7798	28.9904	28.0325	-1			19	19	19	4572500000	32	182
O00232	O00232	26S proteasome non-ATPase regulatory subunit 12	PSMD12	0.435402	-0.421304	52.904	36.967	27.177	26.4491	27.9715	27.3717	26.9189	26.9827	-1			11	11	11	1889900000	34	82
O00233	O00233	26S proteasome non-ATPase regulatory subunit 9	PSMD9	0.0715474	-0.182955	24.682	7.534	22.9004	23.6999	25.3357	24.8905	25.4081	24.505	-1			2	2	2	319600000	11	19
O00244	O00244	Copper transport protein ATOX1	ATOX1	0.0780527	-0.216316	7.4016	2.2042	24.5381	22.4168	23.2017	25.1716	23.227	22.7295	-1			2	2	2	182110000	4	2
O00264	O00264	Membrane-associated progesterone receptor component 1	PGRMC1	0.786694	-0.520062	21.671	64.592	27.9119	27.1748	28.4401	27.418	27.6038	27.8028	-1			6	6	5	2683900000	10	98
O00267	O00267	Transcription elongation factor SPT5	SUPT5H	0.338187	-0.41444	121	31.501	26.5752	25.6998	27.2659	26.1237	25.6938	26.4681	-1			12	12	12	1058300000	56	52
O95714;Q9BVR0	O95714	E3 ubiquitin-protein ligase HERC2	HERC2	4.02444	2.99442	527.22	323.31	27.4915	30.8085	28.14	30.7892	27.8633	30.8803	-1	+	BicD2_Trbo_RFP-Trbo	123	123	123	18580000000	242	761
O00299	O00299	Chloride intracellular channel protein 1	CLIC1	0.275932	-0.305419	26.922	98.125	28.1933	27.7052	29.2155	28.7955	28.4406	28.4324	-1			12	12	12	4678100000	17	160
O00303	O00303	Eukaryotic translation initiation factor 3 subunit F	EIF3F	0.24445	-0.173705	37.563	124.14	27.831	27.6832	28.5776	28.2099	28.2388	28.2331	-1			9	9	9	3330000000	16	99
P49792;Q05823	P49792	E3 SUMO-protein ligase RanBP2	RANBP2	5.96805	2.95406	358.2	323.31	30.9618	33.7522	30.8549	33.857	30.7945	33.8642	-1	+	BicD2_Trbo_RFP-Trbo	136	136	90	89182000000	207	1832
O00410	O00410	Importin-5	IPO5	0.863195	-0.878347	123.63	281.69	29.6304	28.431	30.5715	29.7255	29.9054	29.3157	-1			38	38	36	11716000000	55	414
Q9H269	Q9H269	Vacuolar protein sorting-associated protein 16 homolog	VPS16	2.57816	2.85673	94.693	57.69	24.5237	26.4633	23.6758	27.6253	24.4183	27.0994	-1	+	BicD2_Trbo_RFP-Trbo	16	16	16	1252600000	47	52
Q9H6R7	Q9H6R7	WD repeat and coiled-coil-containing protein C2orf44	C2orf44	1.98327	2.81142	79.135	30.724	24.3221	26.3977	22.6368	26.5088	24.4889	26.9755	-1	+	BicD2_Trbo_RFP-Trbo	13	13	13	1194900000	34	41
Q8N5T2	Q8N5T2	TBC1 domain family member 19	TBC1D19	2.45478	2.79882	60.207	4.2909	21.3088	24.8818	22.8477	24.8777	21.8857	24.6792	-1	+	BicD2_Trbo_RFP-Trbo	5	5	5	265040000	26	8
O00442	O00442	RNA 3-terminal phosphate cyclase	RTCA	1.04055	-1.06932	39.336	2.3486	22.0393	21.6797	23.0262	22.0733	23.6435	21.748	-1			3	3	3	126200000	20	5
O00443	O00443	Phosphatidylinositol 4-phosphate 3-kinase C2 domain-containing subunit alpha	PIK3C2A	1.21855	-0.302982	190.68	62.648	28.4078	28.0529	28.343	28.2708	28.3544	27.8726	-1			27	27	27	3271400000	110	141
O00459	O00459	Phosphatidylinositol 3-kinase regulatory subunit beta	PIK3R2	0.704559	-0.703256	81.544	1.8549	23.9935	22.1943	23.2028	22.5548	23.0201	23.3576	-1			2	2	2	79539000	48	1
O00471	O00471	Exocyst complex component 5	EXOC5	0.38207	-1.55714	81.852	1.9079	22.914	20.8483	26.0338	23.2059	25.5262	25.7485	-1			2	2	2	356130000	47	1
G2XKQ0;P63165	G2XKQ0;P63165	Small ubiquitin-related modifier;Small ubiquitin-related modifier 1	SUMO1	3.22084	2.54544	11.526	6.9707	25.1292	27.8789	25.4498	28.1318	25.9623	28.167	-1	+	BicD2_Trbo_RFP-Trbo	2	2	2	1716100000	5	39
O00487	O00487	26S proteasome non-ATPase regulatory subunit 14	PSMD14	1.10811	-1.0542	34.577	7.0943	26.4064	24.1803	25.9703	25.2379	25.6095	25.4054	-1			4	4	4	634530000	16	21
Q8IUZ0	Q8IUZ0	Leucine-rich repeat-containing protein 49	LRRC49	1.68133	2.29017	78.893	22.21	22.6283	24.8717	23.9462	26.0439	23.8324	26.3617	-1	+	BicD2_Trbo_RFP-Trbo	10	10	10	552680000	42	32
O95619	O95619	YEATS domain-containing protein 4	YEATS4	1.88659	2.25707	26.499	22.128	22.4334	25.0186	23.6129	24.7348	21.8339	24.898	-1	+	BicD2_Trbo_RFP-Trbo	5	5	5	414300000	14	16
Q9H0L4	Q9H0L4	Cleavage stimulation factor subunit 2 tau variant	CSTF2T	1.84073	2.20604	64.436	7.4239	21.5645	25.0017	23.0142	24.5864	23.2139	24.8226	-1	+	BicD2_Trbo_RFP-Trbo	5	5	3	121940000	30	7
P05165	P05165	Propionyl-CoA carboxylase alpha chain, mitochondrial	PCCA	3.01489	2.03629	80.058	63.438	26.1134	28.043	25.7485	27.5496	25.4739	27.8522	-1	+	BicD2_Trbo_RFP-Trbo	23	23	23	2588800000	51	121
O00629	O00629	Importin subunit alpha-3	KPNA4	0.570867	1.27489	57.886	4.4	22.4167	23.3966	23.9088	25.7927	24.5799	25.5409	-1			6	4	4	257850000	19	7
O00743	O00743	Serine/threonine-protein phosphatase 6 catalytic subunit;Serine/threonine-protein phosphatase 6 catalytic subunit, N-terminally processed	PPP6C	0.231854	-0.146641	35.144	20.269	26.6207	26.0803	26.287	25.9513	25.8217	26.2579	-1			6	6	6	890830000	20	53
O00762	O00762	Ubiquitin-conjugating enzyme E2 C	UBE2C	0.672499	-1.62368	19.652	4.1576	23.895	21.7147	24.0297	24.5954	24.3002	21.0438	-1			3	3	3	169340000	13	6
O00763	O00763	Acetyl-CoA carboxylase 2;Biotin carboxylase	ACACB	0.903061	2.94717	276.54	7.4662	23.9894	24.2362	24.0646	28.6195	24.8056	28.8453	-1			20	6	6	1993200000	141	13
O00767	O00767	Acyl-CoA desaturase	SCD	0.0396522	0.159868	41.522	6.8963	21.3059	21.1648	24.4871	24.3317	23.2582	24.0343	-1			2	2	2	158360000	17	13
Q99666	Q99666	RANBP2-like and GRIP domain-containing protein 5/6	RGPD5	1.49043	1.98879	198.92	9.5797	23.4484	25.1686	23.106	24.3967	21.5903	24.5458	-1	+	BicD2_Trbo_RFP-Trbo	41	6	1	182620000	110	8
O14561	O14561	Acyl carrier protein, mitochondrial	NDUFAB1	0.383135	-0.589708	17.417	5.5473	24.0459	23.2296	25.5765	24.1966	24.3229	24.7501	-1			2	2	2	310230000	9	22
O14562	O14562	Ubiquitin domain-containing protein UBFD1	UBFD1	0.159318	-0.536732	33.382	2.4423	24.2098	20.4363	22.8158	22.694	21.6587	23.9438	-1			3	3	3	79188000	12	3
Q9HC77	Q9HC77	Centromere protein J	CENPJ	1.3064	1.98863	153	7.5087	21.8292	24.1694	20.6658	24.0629	22.7529	22.9815	-1	+	BicD2_Trbo_RFP-Trbo	4	4	4	117460000	82	6
O14579	O14579	Coatomer subunit epsilon	COPE	0.560468	-0.656576	34.482	41.837	26.8778	26.0288	27.7737	27.5596	27.4844	26.5777	-1			9	9	9	1738300000	19	68
P47813;O14602	P47813;O14602	Eukaryotic translation initiation factor 1A, X-chromosomal;Eukaryotic translation initiation factor 1A, Y-chromosomal	EIF1AX;EIF1AY	0.906918	-0.817224	16.46	42.024	27.0083	25.6695	27.5147	26.901	26.751	26.2517	-1			3	3	3	1369800000	10	48
Q96QC0	Q96QC0	Serine/threonine-protein phosphatase 1 regulatory subunit 10	PPP1R10	3.19757	1.94367	99.057	2.2829	23.3044	25.4938	23.3324	25.501	23.9082	25.3812	-1	+	BicD2_Trbo_RFP-Trbo	2	2	2	238970000	46	6
O14639	O14639	Actin-binding LIM protein 1	ABLIM1	0.392451	-0.693336	87.687	18.586	25.7602	24.2595	25.5816	24.1199	23.447	24.3293	-1			5	5	5	410430000	53	22
O14640;P54792	O14640;P54792	Segment polarity protein dishevelled homolog DVL-1;Putative segment polarity protein dishevelled homolog DVL1P1	DVL1;DVL1P1	0.878578	-0.95745	75.186	15.171	24.6265	24.0423	24.8083	24.7074	25.2794	23.0921	-1			7	4	4	237300000	33	5
O14524	O14524	Transmembrane protein 194A	TMEM194A	1.48746	1.89234	50.639	3.0752	22.1951	24.4354	23.851	24.9038	22.092	24.4759	-1	+	BicD2_Trbo_RFP-Trbo	3	3	3	86596000	22	3
Q1MSJ5	Q1MSJ5	Centrosome and spindle pole-associated protein 1	CSPP1	1.57688	1.87144	145.52	28.766	21.8537	24.8978	23.0456	24.0909	22.0068	23.5318	-1	+	BicD2_Trbo_RFP-Trbo	12	12	12	679500000	68	30
Q92609	Q92609	TBC1 domain family member 5	TBC1D5	1.64569	1.85335	89.003	10.646	23.0191	25.3961	24.0323	25.4457	22.6951	24.4648	-1	+	BicD2_Trbo_RFP-Trbo	6	6	6	502010000	39	5
O14730	O14730	Serine/threonine-protein kinase RIO3	RIOK3	0.227345	-0.213364	59.092	2.6303	23.2314	23.2491	24.3628	23.4835	23.4653	23.6869	-1			1	1	1	96346000	29	5
O14733	O14733	Dual specificity mitogen-activated protein kinase kinase 7	MAP2K7	0.213435	0.373386	47.484	3.126	22.6089	23.2974	22.7784	24.1578	22.7868	21.8392	-1			3	3	3	53798000	24	3
O14735	O14735	CDP-diacylglycerol--inositol 3-phosphatidyltransferase	CDIPT	0.266504	0.371216	23.539	2.4011	22.8253	24.3268	24.5084	24.4289	24.4383	24.1299	-1			1	1	1	208180000	8	15
O14737	O14737	Programmed cell death protein 5	PDCD5	0.22958	-0.227975	14.285	43.108	28.3443	28.3087	29.2851	28.9736	29.317	28.9802	-1			7	7	7	5610900000	10	104
Q12769	Q12769	Nuclear pore complex protein Nup160	NUP160	3.14341	1.8321	162.12	20.067	24.0132	26.0826	24.0665	25.9507	24.5988	26.1415	-1	+	BicD2_Trbo_RFP-Trbo	9	9	9	506990000	64	23
O14745	O14745	Na(+)/H(+) exchange regulatory cofactor NHE-RF1	SLC9A3R1	1.1451	-1.07766	38.868	9.2001	24.9005	24.0466	25.6773	24.8171	25.0515	23.5326	-1			2	2	2	317500000	27	11
O14776	O14776	Transcription elongation regulator 1	TCERG1	0.916413	-1.15038	123.9	11.612	26.0425	24.538	26.6374	25.7789	25.3799	24.2919	-1			8	8	8	553080000	50	28
O14777	O14777	Kinetochore protein NDC80 homolog	NDC80	0.885416	1.06802	73.912	4.7151	22.0207	24.1532	23.7136	24.3215	23.6819	24.1455	-1			5	5	5	129010000	49	9
O14818;Q8TAA3	O14818	Proteasome subunit alpha type-7	PSMA7	0.698235	-0.61636	27.887	49.387	28.6061	27.0825	28.4125	28.392	28.1454	27.8403	-1			10	10	10	3786900000	16	101
O14828	O14828	Secretory carrier-associated membrane protein 3	SCAMP3	0.817035	-0.858518	38.287	11.613	25.4253	24.5074	26.5257	24.7048	25.3049	25.4681	-1			5	5	5	530000000	13	25
Q13085;Q15818	Q13085	Acetyl-CoA carboxylase 1;Biotin carboxylase	ACACA	5.01566	1.82105	265.55	323.31	32.2625	33.9506	32.1551	34.1199	32.2789	34.0892	-1	+	BicD2_Trbo_RFP-Trbo	119	119	104	176690000000	135	2622
O14880	O14880	Microsomal glutathione S-transferase 3	MGST3	0.22394	0.289865	16.516	2.6885	22.5824	23.7011	22.9215	22.8673	23.9607	23.7658	-1			2	2	2	164180000	8	6
O14929	O14929	Histone acetyltransferase type B catalytic subunit	HAT1	0.946592	-0.682018	49.512	18.297	26.0696	25.3598	26.7857	26.2466	26.3847	25.5875	-1			5	5	5	855250000	21	42
Q969Q6	Q969Q6	Serine/threonine-protein phosphatase 2A regulatory subunit B subunit gamma	PPP2R3C	1.6279	1.80501	53.315	12.757	24.018	24.8894	22.4762	25.111	23.6592	25.5679	-1	+	BicD2_Trbo_RFP-Trbo	8	8	8	405300000	32	22
Q9H6J7	Q9H6J7	UPF0705 protein C11orf49	C11orf49	1.42482	1.79521	37.353	20.945	24.5201	26.5564	24.5662	25.6171	23.1298	25.4282	-1	+	BicD2_Trbo_RFP-Trbo	6	6	6	472130000	18	29
O14964	O14964	Hepatocyte growth factor-regulated tyrosine kinase substrate	HGS	0.00572276	0.0061086	86.191	26.62	25.2567	24.9407	25.1546	25.9805	25.6278	25.1361	-1			6	6	6	550850000	29	36
O14965	O14965	Aurora kinase A	AURKA	0.197149	-0.553936	45.809	8.2368	24.6782	25.0688	28.0556	25.6582	25.0694	25.4143	-1			5	5	5	964810000	24	23
P29373;P29762	P29373	Cellular retinoic acid-binding protein 2	CRABP2	1.59275	1.77609	15.693	3.0561	23.1815	23.5252	22.054	24.5879	21.9654	24.4162	-1	+	BicD2_Trbo_RFP-Trbo	3	3	3	134900000	11	8
O14976	O14976	Cyclin-G-associated kinase	GAK	0.191	0.318095	143.19	7.7705	23.7141	24.6331	25.7949	25.1812	24.325	24.974	-1			7	7	7	361630000	69	6
O14979	O14979	Heterogeneous nuclear ribonucleoprotein D-like	HNRNPDL	0.43802	-0.337121	46.437	13.775	26.9372	26.4901	27.6458	27.3767	27.3376	27.0425	-1			7	6	6	1873800000	24	50
O14980	O14980	Exportin-1	XPO1	0.191964	-0.159307	123.38	92.78	28.4324	27.8975	28.7614	28.9482	28.5655	28.4357	-1			29	29	29	5376000000	58	223
Q02224	Q02224	Centromere-associated protein E	CENPE	3.81696	1.77284	316.41	28.616	24.7491	26.6179	25.0856	26.7114	25.0381	26.8621	-1	+	BicD2_Trbo_RFP-Trbo	19	19	19	1209900000	204	37
A6NKT7	A6NKT7	RanBP2-like and GRIP domain-containing protein 3	RGPD3	2.12259	1.74959	197.48	11.01	25.6189	28.0077	26.6188	28.1301	26.7061	28.0547	-1	+	BicD2_Trbo_RFP-Trbo	45	5	1	2082100000	112	34
Q13409	Q13409	Cytoplasmic dynein 1 intermediate chain 2	DYNC1I2	2.19188	1.71186	71.456	141.88	25.8975	27.8414	26.8829	27.9908	25.9276	28.0113	-1	+	BicD2_Trbo_RFP-Trbo	13	13	12	3157000000	22	120
O15067	O15067	Phosphoribosylformylglycinamidine synthase	PFAS	0.180625	-0.264641	144.73	85.036	27.7785	26.9631	28.6196	28.5794	27.6483	27.71	-1			23	23	23	3447700000	62	133
O15078	O15078	Centrosomal protein of 290 kDa	CEP290	0.00871872	-0.0356255	290.38	16.238	24.2823	23.9467	24.3528	25.7203	22.6421	21.5033	-1			14	14	14	540220000	185	19
O15084;Q8N8A2	O15084	Serine/threonine-protein phosphatase 6 regulatory ankyrin repeat subunit A	ANKRD28	0.375771	0.423353	112.96	24.495	25.0573	26.5299	26.5639	26.4487	26.2602	26.1729	-1			12	12	12	892750000	37	38
O15111	O15111	Inhibitor of nuclear factor kappa-B kinase subunit alpha	CHUK	0.128966	-0.121541	84.639	5.1393	25.0364	25.3258	24.9616	24.271	25.2048	25.2414	-1			5	5	4	498500000	41	15
O15116	O15116	U6 snRNA-associated Sm-like protein LSm1	LSM1	0.358852	-0.259424	15.179	5.1971	24.3443	24.1275	25.0224	24.8873	24.8693	24.4429	-1			4	4	4	291760000	11	19
O15126	O15126	Secretory carrier-associated membrane protein 1	SCAMP1	0.229194	0.56282	37.92	7.127	21.3897	22.2227	22.9591	24.0009	24.0552	23.8689	-1			1	1	1	63184000	16	2
O15143	O15143	Actin-related protein 2/3 complex subunit 1B	ARPC1B	0.941703	-1.72003	40.949	4.0951	23.4782	21.3421	24.0989	22.0845	21.628	20.6185	-1			4	3	3	143040000	19	2
O15144	O15144	Actin-related protein 2/3 complex subunit 2	ARPC2	0.901864	-0.635329	34.333	15.128	26.6326	25.1141	26.1252	26.0471	26.0771	25.7678	-1			9	9	9	928750000	22	49
Q9Y597	Q9Y597	BTB/POZ domain-containing protein KCTD3	KCTD3	2.19911	1.66074	88.983	3.6304	22.2897	24.6804	22.6913	24.4144	22.9783	23.8469	-1	+	BicD2_Trbo_RFP-Trbo	5	4	4	218380000	48	8
P06280	P06280	Alpha-galactosidase A	GLA	2.16298	1.6439	48.766	3.3561	22.157	23.2735	21.3486	23.7395	22.2487	23.673	-1	+	BicD2_Trbo_RFP-Trbo	3	3	3	64813000	28	8
O15173	O15173	Membrane-associated progesterone receptor component 2	PGRMC2	0.18702	-0.546887	23.818	1.6889	24.1577	21.1283	22.7159	24.5167	22.6138	22.2018	-1			3	2	2	110790000	12	2
O15182	O15182	Centrin-3	CETN3	1.15989	-2.23549	19.55	29.215	24.3182	23.4108	25.1876	21.1488	25.5658	23.8055	-1			2	2	2	307790000	12	14
A6NKD9	A6NKD9	Coiled-coil domain-containing protein 85C	CCDC85C	1.57659	1.62819	45.209	6.3469	21.7843	23.7909	22.2616	24.2313	23.3137	24.2219	-1	+	BicD2_Trbo_RFP-Trbo	4	4	4	160610000	20	6
O15212	O15212	Prefoldin subunit 6	PFDN6	0.749529	-0.602153	14.582	46.347	27.9532	26.7853	28.2284	27.9675	28.1007	27.7231	-1			6	6	6	2585600000	12	86
Q9HCC0	Q9HCC0	Methylcrotonoyl-CoA carboxylase beta chain, mitochondrial	MCCC2	3.84405	1.55793	61.332	323.31	28.6236	30.3593	28.831	30.2731	28.9559	30.4519	-1	+	BicD2_Trbo_RFP-Trbo	24	24	24	14065000000	34	409
O15228	O15228	Dihydroxyacetone phosphate acyltransferase	GNPAT	0.508947	-1.45795	77.187	1.9218	25.366	20.5033	22.0737	22.7043	23.2083	23.0664	-1			3	3	3	98846000	40	2
Q8TD19	Q8TD19	Serine/threonine-protein kinase Nek9	NEK9	3.444	1.55596	107.17	65.232	27.1323	28.6593	27.1807	28.5893	26.7666	28.499	-1	+	BicD2_Trbo_RFP-Trbo	19	19	19	2989800000	47	103
O43237	O43237	Cytoplasmic dynein 1 light intermediate chain 2	DYNC1LI2	1.978	1.50809	54.099	41.713	25.6367	26.7505	26.1098	27.3762	25.1991	27.3432	-1	+	BicD2_Trbo_RFP-Trbo	11	9	9	1412700000	26	51
O15258	O15258	Protein RER1	RER1	1.09994	-1.63577	22.958	2.4036	21.9844	21.2512	24.0517	22.0419	23.8684	21.7041	-1			2	2	2	39992000	9	4
O15260	O15260	Surfeit locus protein 4	SURF4	0.370641	-1.04438	30.394	6.3202	25.5028	21.9916	25.5943	25.5008	25.0006	25.4722	-1			2	2	2	444620000	9	21
å	O75665	Oral-facial-digital syndrome 1 protein	OFD1	1.78488	1.4943	116.67	94.443	23.8431	25.4823	24.9316	25.8562	23.8782	25.7973	-1	+	BicD2_Trbo_RFP-Trbo	22	22	22	1413000000	72	66
O15294	O15294	UDP-N-acetylglucosamine--peptide N-acetylglucosaminyltransferase 110 kDa subunit	OGT	0.0626177	0.0366491	116.92	20.041	25.8981	26.2549	26.5627	26.3092	26.3902	26.3968	-1			12	12	12	850090000	49	31
O15344	O15344	E3 ubiquitin-protein ligase Midline-1	MID1	0.0456835	-0.104198	75.25	1.813	22.5397	20.8164	22.1982	21.7723	21.394	23.2306	-1			2	2	2	28419000	40	1
O15347	O15347	High mobility group protein B3	HMGB3	0.123661	0.124446	22.98	8.3494	25.2791	25.2782	25.9622	26.3093	25.5197	25.5469	-1			4	4	4	691270000	11	32
O15355	O15355	Protein phosphatase 1G	PPM1G	0.429248	-0.660618	59.271	14.874	26.0914	24.8405	27.1721	26.6302	26.7071	26.5181	-1			7	7	7	1068300000	25	39
P63279	P63279	SUMO-conjugating enzyme UBC9	UBE2I	2.39238	1.49024	18.007	60.619	28.2028	29.8239	28.9058	30.0013	28.1377	29.8919	-1	+	BicD2_Trbo_RFP-Trbo	7	7	7	7416300000	7	125
O15372	O15372	Eukaryotic translation initiation factor 3 subunit H	EIF3H	0.839346	-0.649298	39.93	48.967	27.6853	26.3319	27.6771	27.1593	26.8794	26.8027	-1			13	13	13	1808100000	24	102
O15381	O15381	Nuclear valosin-containing protein-like	NVL	1.18345	-0.587956	95.05	1.9751	22.4826	21.3137	22.0295	21.5083	21.9451	21.8714	-1			2	2	2	13534000	50	2
O15397	O15397	Importin-8	IPO8	0.942905	1.40006	119.94	10.321	28.4964	28.426	28.6024	30.4111	27.5189	29.9806	-1			7	6	6	5285900000	54	27
P46060	P46060	Ran GTPase-activating protein 1	RANGAP1	3.54739	1.47867	63.541	323.31	29.6646	31.2183	30.0387	31.3297	29.8376	31.4289	-1	+	BicD2_Trbo_RFP-Trbo	26	26	26	19889000000	31	389
Q9Y5B9	Q9Y5B9	FACT complex subunit SPT16	SUPT16H	2.46379	1.47107	119.91	2.7903	21.3969	23.3932	22.1666	23.224	21.9805	23.34	-1	+	BicD2_Trbo_RFP-Trbo	3	3	3	58299000	63	2
Q9P2J3	Q9P2J3	Kelch-like protein 9	KLHL9	3.02119	1.44526	69.428	23.829	24.8461	26.636	25.247	26.6811	25.2919	26.4037	-1	+	BicD2_Trbo_RFP-Trbo	14	5	5	996240000	38	65
Q9Y2D8	Q9Y2D8	Afadin- and alpha-actinin-binding protein	SSX2IP	2.63436	1.44078	71.235	85.12	26.3243	27.3482	25.6231	27.4946	26.0474	27.4743	-1	+	BicD2_Trbo_RFP-Trbo	16	16	16	2231200000	35	67
P18754	P18754	Regulator of chromosome condensation	RCC1	2.5572	1.34485	44.969	114.53	27.9628	28.9517	28.0957	29.3769	27.5925	29.357	-1	+	BicD2_Trbo_RFP-Trbo	16	16	16	4759700000	19	153
P57740	P57740	Nuclear pore complex protein Nup107	NUP107	2.99856	1.33242	106.37	64.918	26.4692	27.9512	26.706	28.2108	26.7717	27.782	-1	+	BicD2_Trbo_RFP-Trbo	23	23	23	2130300000	55	116
O43169	O43169	Cytochrome b5 type B	CYB5B	0.359486	-0.721333	16.694	42.074	26.1773	25.6238	25.415	25.059	24.5683	23.3137	-1			3	3	3	546060000	8	17
O43172	O43172	U4/U6 small nuclear ribonucleoprotein Prp4	PRPF4	0.481694	-0.690051	58.449	14.645	25.4415	23.8285	25.8576	25.5304	24.5841	24.4542	-1			7	7	7	415450000	29	11
O43175	O43175	D-3-phosphoglycerate dehydrogenase	PHGDH	0.068331	0.0827357	56.65	322.05	29.3753	29.3947	30.3439	30.4848	29.771	29.8589	-1			19	19	19	12199000000	24	287
Q6ZTW0	Q6ZTW0	Tubulin polyglutamylase complex subunit 1	TPGS1	1.78647	1.33178	31.274	25.611	22.2542	24.315	23.0929	23.6261	22.8631	24.2645	-1	+	BicD2_Trbo_RFP-Trbo	7	7	7	255180000	21	18
O43242	O43242	26S proteasome non-ATPase regulatory subunit 3	PSMD3	0.425631	-0.166245	60.977	98.558	28.3158	27.844	28.3687	28.3461	28.3428	28.3384	-1			18	18	18	3598700000	39	142
O43252	O43252	Bifunctional 3-phosphoadenosine 5-phosphosulfate synthase 1;Sulfate adenylyltransferase;Adenylyl-sulfate kinase	PAPSS1	0.113524	-0.141383	70.832	5.5205	21.9104	21.669	23.0005	22.6786	22.4604	22.5996	-1			2	2	2	72512000	35	4
O43264	O43264	Centromere/kinetochore protein zw10 homolog	ZW10	0.173198	0.29478	88.828	22.818	26.1536	25.9917	26.2582	25.5551	24.3382	26.0875	-1			8	8	8	631920000	49	30
O43293	O43293	Death-associated protein kinase 3	DAPK3	0.682506	-0.614837	52.535	12.93	26.7094	26.0304	25.729	25.0287	26.1821	25.7168	-1			7	7	7	693420000	24	30
O43295	O43295	SLIT-ROBO Rho GTPase-activating protein 3	SRGAP3	0.201259	0.94983	124.5	1.9686	26.4241	25.6554	22.2901	22.2495	22.2769	25.9357	-1			2	2	2	612390000	67	1
O14576	O14576	Cytoplasmic dynein 1 intermediate chain 1	DYNC1I1	1.54667	1.31024	72.955	5.0797	22.1915	23.6344	23.2718	24.4475	22.7166	24.0288	-1	+	BicD2_Trbo_RFP-Trbo	2	1	1	162540000	22	6
O43318	O43318	Mitogen-activated protein kinase kinase kinase 7	MAP3K7	0.78767	-0.506336	67.195	9.4415	25.7567	24.9071	26.2332	25.6849	25.6818	25.5606	-1			5	5	5	575750000	33	33
Q9Y5R8	Q9Y5R8	Trafficking protein particle complex subunit 1	TRAPPC1	2.46777	1.29214	16.831	2.5832	21.6916	23.3207	22.2133	23.001	21.6315	23.0912	-1	+	BicD2_Trbo_RFP-Trbo	1	1	1	72987000	12	5
O43379	O43379	WD repeat-containing protein 62	WDR62	0.17186	-0.301427	165.95	7.1007	22.7546	23.7933	22.5888	21.77	23.5234	22.3991	-1			5	5	5	76088000	68	4
O43390	O43390	Heterogeneous nuclear ribonucleoprotein R	HNRNPR	0.279626	-0.233304	70.942	50.095	27.5387	27.1145	28.1615	27.8391	27.293	27.3398	-1			16	12	12	2354900000	41	122
Q8IVF2	Q8IVF2	Protein AHNAK2	AHNAK2	1.30536	1.2908	616.62	22.078	25.7868	27.2751	26.4817	26.6905	25.0056	27.1809	-1	+	BicD2_Trbo_RFP-Trbo	15	15	15	1265600000	316	71
O43396	O43396	Thioredoxin-like protein 1	TXNL1	0.438195	-0.486784	32.251	13.647	26.3192	25.1847	26.5891	26.7483	26.1754	25.6904	-1			5	5	5	745600000	15	33
O43399	O43399	Tumor protein D54	TPD52L2	0.37152	0.155615	22.237	33.321	27.2531	27.031	27.0769	27.5838	27.2538	27.436	-1			7	7	7	1524400000	14	53
O43414	O43414	ERI1 exoribonuclease 3	ERI3	0.122013	-0.404287	37.238	1.9184	24.558	23.2449	25.3894	23.4143	21.4228	23.4981	-1			2	2	2	192150000	16	7
O43426	O43426	Synaptojanin-1	SYNJ1	0.247788	-0.886003	173.1	5.8899	27.5357	26.9506	27.5382	27.2415	25.2832	23.507	-1			7	7	7	1819600000	93	11
Q14204	Q14204	Cytoplasmic dynein 1 heavy chain 1	DYNC1H1	2.37187	1.28205	532.4	323.31	30.7415	32.1387	31.4073	32.4848	30.9948	32.3662	-1	+	BicD2_Trbo_RFP-Trbo	181	181	181	62335000000	281	2219
O43447	O43447	Peptidyl-prolyl cis-trans isomerase H	PPIH	0.699188	-0.798775	19.208	2.2708	24.4902	23.3342	25.1689	24.0191	25.0664	24.9759	-1			3	2	2	318990000	14	17
Q9Y6G9	Q9Y6G9	Cytoplasmic dynein 1 light intermediate chain 1	DYNC1LI1	1.83041	1.23865	56.578	45.175	25.9312	27.4692	26.92	27.6989	26.3976	27.7967	-1	+	BicD2_Trbo_RFP-Trbo	17	17	15	2876000000	31	106
O43488;Q8NHP1	O43488	Aflatoxin B1 aldehyde reductase member 2	AKR7A2	0.698383	-0.96907	39.589	10.185	24.5395	24.1157	26.4533	25.0486	25.8848	24.8062	-1			5	5	5	452620000	18	18
Q16512	Q16512	Serine/threonine-protein kinase N1	PKN1	3.00105	1.23789	103.93	124.3	28.0526	29.024	27.5978	29.0178	27.6556	28.9779	-1	+	BicD2_Trbo_RFP-Trbo	20	19	19	5218600000	46	192
O43502	O43502	DNA repair protein RAD51 homolog 3	RAD51C	0.490701	-0.351949	42.189	2.8544	22.7369	22.7003	22.7244	21.7355	22.6688	22.6385	-1			2	2	2	45153000	20	2
O43504	O43504	Ragulator complex protein LAMTOR5	LAMTOR5	0.715694	-0.827355	9.6138	5.6415	25.4759	24.2119	26.0231	24.2835	24.3936	24.9153	-1			2	2	2	317110000	5	12
Q9P2N7	Q9P2N7	Kelch-like protein 13	KLHL13	1.86666	1.22786	73.867	54.865	26.8769	27.3426	26.255	27.6458	26.154	27.9811	-1	+	BicD2_Trbo_RFP-Trbo	15	15	6	2163700000	43	94
O43524;A0A2Z4LIS9	O43524;A0A2Z4LIS9	Forkhead box protein O3	FOXO3	0.733799	-0.534807	71.276	6.1153	26.2014	25.2585	26.1114	25.5145	25.2121	25.1475	-1			4	4	4	514550000	20	15
O43583	O43583	Density-regulated protein	DENR	0.650405	0.873674	22.092	4.9029	23.4399	24.4986	25.1514	25.3674	23.5505	24.8968	-1			3	3	3	297580000	9	21
O43592	O43592	Exportin-T	XPOT	0.384078	-0.734516	109.96	18.465	25.3935	24.4182	27.1185	26.4312	26.6179	26.077	-1			13	13	13	917520000	43	33
O43598	O43598	2-deoxynucleoside 5-phosphate N-hydrolase 1	DNPH1	0.197243	-0.469065	19.108	14.852	23.8588	23.7158	26.209	25.7217	25.6232	24.8463	-1			5	5	5	595800000	11	21
O43615	O43615	Mitochondrial import inner membrane translocase subunit TIM44	TIMM44	0.37096	-0.536015	51.355	11.506	25.6956	24.2906	26.4427	25.5611	25.1091	25.7876	-1			6	6	6	555400000	31	29
O43617	O43617	Trafficking protein particle complex subunit 3	TRAPPC3	0.0688839	-0.258561	20.274	2.2538	21.6731	23.8615	25.2354	24.5875	24.3628	22.0466	-1			2	2	2	218390000	9	16
O43663	O43663	Protein regulator of cytokinesis 1	PRC1	1.27513	-0.90092	71.606	42.629	27.8877	26.1762	27.6816	26.8699	27.1716	26.992	-1			13	13	13	1696200000	37	71
O43670	O43670	BUB3-interacting and GLEBS motif-containing protein ZNF207	ZNF207	1.2624	-0.760177	50.75	4.9633	26.046	24.8807	26.217	25.8205	26.2278	25.509	-1			3	3	3	658890000	9	20
O43681	O43681	ATPase ASNA1	ASNA1	0.297776	0.494692	38.792	5.8578	23.6068	23.2663	24.5026	25.2616	23.887	24.9526	-1			3	3	3	277050000	15	15
O43683	O43683	Mitotic checkpoint serine/threonine-protein kinase BUB1	BUB1	0.227308	0.37291	122.37	18.735	25.3259	25.9646	24.219	25.8634	25.6756	24.5114	-1			8	8	8	1689200000	58	16
O43684	O43684	Mitotic checkpoint protein BUB3	BUB3	0.197427	0.0962861	37.154	135.94	29.0878	28.957	29.3544	29.498	29.0257	29.3018	-1			11	11	11	7250500000	16	183
O43707;Q9H254	O43707	Alpha-actinin-4	ACTN4	0.178026	-0.235116	104.85	323.31	29.1837	28.9134	30.4535	30.0764	29.741	29.683	-1			41	41	28	12664000000	61	449
O43747	O43747	AP-1 complex subunit gamma-1	AP1G1	0.18518	-0.299306	91.35	10.083	24.5044	24.2883	25.7293	25.8002	25.8769	25.1242	-1			5	5	5	486800000	44	34
O43765	O43765	Small glutamine-rich tetratricopeptide repeat-containing protein alpha	SGTA	0.179377	-0.239124	34.063	17.257	25.7693	25.462	27.0092	26.6406	26.4321	26.3907	-1			7	7	7	955030000	13	41
O43768	O43768	Alpha-endosulfine	ENSA	1.16873	-0.999999	13.389	8.0186	27.2557	25.6427	27.3787	26.8352	26.7807	25.9372	-1			3	3	2	1182400000	9	24
O43776	O43776	Asparagine--tRNA ligase, cytoplasmic	NARS	0.0519578	-0.0632184	62.942	78.775	28.1367	27.6648	28.7639	28.8736	28.5213	28.694	-1			21	21	20	4025200000	29	157
Q13439	Q13439	Golgin subfamily A member 4	GOLGA4	2.24163	1.17483	261.14	46.607	25.5668	26.7894	25.0637	26.6273	25.6858	26.424	-1	+	BicD2_Trbo_RFP-Trbo	18	18	18	675870000	160	30
P51784	P51784	Ubiquitin carboxyl-terminal hydrolase 11	USP11	2.06503	1.15344	109.82	5.1356	22.9107	23.498	22.1882	23.5945	22.3829	23.8497	-1	+	BicD2_Trbo_RFP-Trbo	3	3	3	104010000	54	12
O43809	O43809	Cleavage and polyadenylation specificity factor subunit 5	NUDT21	0.84481	-0.727694	26.227	54.121	27.2405	26.3711	27.9591	27.3914	27.9816	27.2357	-1			6	6	6	2004000000	15	63
O43813	O43813	LanC-like protein 1	LANCL1	0.184588	-0.508165	45.283	10.294	24.059	23.691	24.3943	21.4554	22.201	23.9834	-1			3	3	3	166940000	20	13
O43815	O43815	Striatin	STRN	0.0988349	-0.152685	86.131	6.8113	23.5543	24.4338	24.5132	22.8711	23.7397	24.0442	-1			7	7	7	287130000	38	10
O43819	O43819	Protein SCO2 homolog, mitochondrial	SCO2	0.0866942	0.153815	29.81	1.8558	22.8504	23.8602	24.8033	24.5682	24.3856	24.0723	-1			2	2	2	227310000	19	3
O43822	O43822	Protein C21orf2	C21orf2	0.491149	0.241988	28.34	18.819	26.6087	26.4519	25.9176	26.396	26.0302	26.4345	-1			7	7	6	1046100000	16	49
O43837	O43837	Isocitrate dehydrogenase [NAD] subunit beta, mitochondrial	IDH3B	0.247391	0.31461	42.183	6.1628	24.0953	24.4736	25.4867	25.3823	24.7059	25.3758	-1			3	3	3	379450000	23	20
O43847	O43847	Nardilysin	NRD1	0.0798007	-0.150587	131.7	6.9859	23.0862	23.5324	24.6632	24.4149	25.0427	24.3931	-1			7	7	7	248320000	49	8
O43852	O43852	Calumenin	CALU	0.619336	-0.727561	37.106	46.313	28.1263	26.5182	28.3501	28.3178	28.142	27.5997	-1			10	10	10	3069400000	17	120
Q96RQ3	Q96RQ3	Methylcrotonoyl-CoA carboxylase subunit alpha, mitochondrial	MCCC1	3.8187	1.10013	80.472	323.31	30.5034	31.5674	30.528	31.7859	30.5691	31.5477	-1	+	BicD2_Trbo_RFP-Trbo	28	28	28	34031000000	44	624
Q9UJC3	Q9UJC3	Protein Hook homolog 1	HOOK1	1.31295	1.03724	84.647	47.778	25.142	25.5523	24.9539	26.6113	25.4697	26.5137	-1	+	BicD2_Trbo_RFP-Trbo	12	12	12	1196700000	47	52
O60220	O60220	Mitochondrial import inner membrane translocase subunit Tim8 A	TIMM8A	0.921532	-0.94576	10.998	1.9125	23.8205	23.0035	24.632	24.2039	24.8205	23.2282	-1			1	1	1	162260000	7	5
O60232	O60232	Sjoegren syndrome/scleroderma autoantigen 1	SSSCA1	0.0702496	-0.18527	21.474	3.6902	22.3813	20.3042	22.6501	22.4586	20.901	22.6138	-1			1	1	1	12182000	9	1
Q8IW35	Q8IW35	Centrosomal protein of 97 kDa	CEP97	3.29396	1.00145	96.98	104.59	27.0217	28.1497	26.9495	28.0593	27.2442	28.0107	-1	+	BicD2_Trbo_RFP-Trbo	22	22	22	3099300000	42	118
Q5VT06	Q5VT06	Centrosome-associated protein 350	CEP350	2.67638	1.00089	350.93	164.04	27.6751	28.634	27.6775	28.3856	27.3629	28.6986	-1	+	BicD2_Trbo_RFP-Trbo	48	48	48	4748300000	188	208
Q9BXW9	Q9BXW9	Fanconi anemia group D2 protein	FANCD2	2.22642	0.98509	164.13	2.2902	27.0508	28.4635	27.3719	27.9869	27.4207	28.3482	-1	+	BicD2_Trbo_RFP-Trbo	2	2	2	2355700000	73	13
Q9Y223	Q9Y223	Bifunctional UDP-N-acetylglucosamine 2-epimerase/N-acetylmannosamine kinase;UDP-N-acetylglucosamine 2-epimerase (hydrolyzing);N-acetylmannosamine kinase	GNE	1.47433	0.981362	79.274	15.027	25.6442	25.8004	24.8333	26.4528	25.1517	26.32	-1	+	BicD2_Trbo_RFP-Trbo	8	8	8	635560000	39	23
O60282	O60282	Kinesin heavy chain isoform 5C	KIF5C	0.204578	0.294378	109.49	2.9685	22.4219	22.2626	22.005	22.0266	22.6721	23.6929	-1			10	2	1	61125000	63	4
O75521	O75521	Enoyl-CoA delta isomerase 2, mitochondrial	ECI2	1.35846	0.981222	43.585	11.996	24.8536	25.7162	24.5688	24.9745	24.12	25.7952	-1	+	BicD2_Trbo_RFP-Trbo	5	5	5	474310000	19	16
O60313	O60313	Dynamin-like 120 kDa protein, mitochondrial;Dynamin-like 120 kDa protein, form S1	OPA1	0.468903	-0.72049	111.63	3.3573	22.02	22.1043	23.565	23.0295	23.0614	21.3511	-1			1	1	1	66523000	67	3
O60333	O60333	Kinesin-like protein KIF1B	KIF1B	0.625565	0.770093	204.47	7.826	24.7804	25.2963	23.6611	24.4554	24.8332	25.8333	-1			6	6	2	294410000	108	9
O60341	O60341	Lysine-specific histone demethylase 1A	KDM1A	0.061294	-0.0978718	92.902	4.4135	23.7552	23.0598	24.5666	24.4848	24.1525	24.6361	-1			3	3	3	171970000	44	2
O60343	O60343	TBC1 domain family member 4	TBC1D4	0.334956	1.00271	146.56	3.798	21.9472	24.8313	25.764	25.5013	25.3275	25.7143	-1			3	3	3	510260000	73	8
O60488	O60488	Long-chain-fatty-acid--CoA ligase 4	ACSL4	0.886088	1.39206	79.187	2.1134	21.1533	22.8078	23.0411	23.8649	22.6445	24.3425	-1			5	3	3	134340000	38	0
O60493	O60493	Sorting nexin-3	SNX3	1.08615	-0.993963	18.762	6.6201	25.3133	24.8216	26.6119	25.3243	25.8339	24.6313	-1			4	4	3	524330000	10	26
O60502	O60502	Protein O-GlcNAcase	MGEA5	0.200687	0.326377	102.91	4.5342	25.1991	24.3122	25.1634	25.4111	23.6003	25.2186	-1			5	4	4	328220000	50	11
O60506	O60506	Heterogeneous nuclear ribonucleoprotein Q	SYNCRIP	0.448024	-0.400288	69.602	139.83	29.2928	28.7796	30.1835	29.7239	29.7359	29.5078	-1			16	16	12	8986100000	39	244
O60547	O60547	GDP-mannose 4,6 dehydratase	GMDS	0.41009	-0.365932	41.949	4.5898	22.9871	22.1508	22.9453	23.3214	23.4706	22.8329	-1			2	2	2	79902000	30	6
O60566	O60566	Mitotic checkpoint serine/threonine-protein kinase BUB1 beta	BUB1B	0.0160103	0.0155716	119.54	120.51	29.4151	28.989	28.5359	28.7252	28.4403	28.7238	-1			37	37	37	5502100000	63	223
O60573	O60573	Eukaryotic translation initiation factor 4E type 2	EIF4E2	0.428516	-0.274641	28.362	7.3738	26.8162	26.5819	27.5805	27.0814	27.1379	27.0473	-1			3	3	3	1547000000	13	17
O60610	O60610	Protein diaphanous homolog 1	DIAPH1	0.369623	-0.178868	141.35	45.064	27.4223	26.973	27.6983	27.528	27.4072	27.4902	-1			20	20	20	2164300000	70	92
O60637	O60637	Tetraspanin-3	TSPAN3	0.485344	-0.627925	28.017	1.5884	23.2173	22.1905	24.3548	23.6727	23.4133	23.2384	-1			1	1	1	115440000	9	1
O60664	O60664	Perilipin-3	PLIN3	0.0861488	-0.310071	47.074	10.393	21.8415	21.5011	24.5732	24.5318	24.4164	23.868	-1			6	6	6	222960000	30	6
O60678	O60678	Protein arginine N-methyltransferase 3	PRMT3	0.359881	0.470194	59.902	6.2813	24.9393	24.9939	25.649	25.7504	23.9409	25.1955	-1			5	5	5	444780000	25	19
O60684;O15131	O60684;O15131	Importin subunit alpha-7;Importin subunit alpha-6	KPNA6;KPNA5	0.204389	-0.147299	60.029	40.181	26.1469	25.727	26.4807	26.6299	26.3575	26.1863	-1			9	9	5	955250000	24	40
O60701	O60701	UDP-glucose 6-dehydrogenase	UGDH	0.842909	0.829852	55.023	2.0088	22.1557	22.4002	22.7998	23.4344	22.0935	23.704	-1			2	2	2	94480000	33	1
Q9ULX6	Q9ULX6	A-kinase anchor protein 8-like	AKAP8L	1.92333	0.975793	71.639	7.6528	23.8788	24.8369	24.4672	25.2395	23.9309	25.1279	-1	+	BicD2_Trbo_RFP-Trbo	4	4	4	295170000	28	18
O60749	O60749	Sorting nexin-2	SNX2	0.285361	0.187027	58.47	20.554	26.5689	26.9816	27.2686	27.3668	26.7667	26.8169	-1			12	11	11	1347400000	30	63
O60762	O60762	Dolichol-phosphate mannosyltransferase subunit 1	DPM1	0.254517	-0.279624	29.634	49.721	27.0949	26.34	27.7455	27.6271	27.331	27.3654	-1			11	11	11	2046300000	18	83
O60763	O60763	General vesicular transport factor p115	USO1	0.456852	-0.665277	107.89	4.9713	24.4363	24.0037	24.9044	24.9942	24.5299	22.8769	-1			4	4	4	279030000	49	5
O60784	O60784	Target of Myb protein 1	TOM1	0.205674	-0.626703	53.818	4.3655	22.6779	23.9083	22.6894	23.4649	25.5645	21.6785	-1			5	5	5	292470000	19	7
Q99880;Q99879;Q99877;Q93079;Q5QNW6;P62807;P58876;P57053;O60814;Q96A08;A0A2R8Y619	Q99880;Q99879;Q99877;Q93079;Q5QNW6;P62807;P58876;P57053;O60814;Q96A08	Histone H2B type 1-L;Histone H2B type 1-M;Histone H2B type 1-N;Histone H2B type 1-H;Histone H2B type 2-F;Histone H2B type 1-C/E/F/G/I;Histone H2B type 1-D;Histone H2B type F-S;Histone H2B type 1-K;Histone H2B type 1-A	HIST1H2BL;HIST1H2BM;HIST1H2BN;HIST1H2BH;HIST2H2BF;HIST1H2BC;HIST1H2BD;H2BFS;HIST1H2BK;HIST1H2BA	0.0430608	0.0977732	13.952	2.0874	26.0228	28.0507	26.8042	25.7728	27.4169	26.7137	-1			6	1	1	1576100000	11	9
Q9P2S5	Q9P2S5	WD repeat-containing protein WRAP73	WRAP73	1.46572	0.946607	51.588	19.727	24.4216	25.5079	25.0242	25.5696	24.0493	25.2574	-1	+	BicD2_Trbo_RFP-Trbo	11	11	11	571230000	27	32
O60828	O60828	Polyglutamine-binding protein 1	PQBP1	0.543041	-0.418575	30.472	5.6764	24.3036	23.5034	24.8462	24.2831	24.3469	24.4545	-1			2	2	2	234290000	9	8
A0MZ66	A0MZ66	Shootin-1	KIAA1598	2.17825	0.945431	71.639	80.851	27.9142	29.0109	27.6943	28.9182	27.9685	28.4842	-1	+	BicD2_Trbo_RFP-Trbo	22	22	22	3758400000	44	154
O00213	O00213	Amyloid beta A4 precursor protein-binding family B member 1	APBB1	2.47984	0.943454	77.243	193.95	29.0906	29.6107	28.7396	29.8913	28.7715	29.93	-1	+	BicD2_Trbo_RFP-Trbo	19	19	17	8024200000	32	207
O60869	O60869	Endothelial differentiation-related factor 1	EDF1	0.80388	-0.501742	16.368	4.5085	25.6772	24.6076	25.7208	25.5691	25.5099	25.2259	-1			3	3	3	400110000	12	14
O60879	O60879	Protein diaphanous homolog 2	DIAPH2	0.0338112	-0.10333	125.57	2.6242	25.6977	23.4291	22.9025	23.8454	22.4128	23.4285	-1			4	4	4	182900000	65	6
O60884	O60884	DnaJ homolog subfamily A member 2	DNAJA2	0.471377	-0.400521	45.745	129.44	28.2847	27.9701	29.3365	28.6462	28.671	28.4744	-1			10	10	10	4305200000	23	109
O60888	O60888	Protein CutA	CUTA	0.0960911	0.28622	19.116	17.627	24.7865	24.5953	26.793	26.2876	23.5653	25.1207	-1			3	3	3	500990000	7	15
O60925	O60925	Prefoldin subunit 1	PFDN1	1.08218	-0.653163	14.21	8.7798	25.5059	24.6846	26.0976	25.4362	25.7097	25.2329	-1			3	3	3	473000000	9	19
Q14974	Q14974	Importin subunit beta-1	KPNB1	1.96846	0.939641	97.169	323.31	30.1336	31.1841	30.747	31.5322	30.4962	31.4794	-1	+	BicD2_Trbo_RFP-Trbo	28	28	28	23544000000	38	574
O75027	O75027	ATP-binding cassette sub-family B member 7, mitochondrial	ABCB7	0.0756304	0.169315	82.64	3.0277	22.9304	23.7627	24.9962	25.0052	25.0226	24.6892	-1			3	3	3	266780000	39	3
O75044;P0DMP2;P0DJJ0;Q7Z6B7	O75044	SLIT-ROBO Rho GTPase-activating protein 2	SRGAP2	1.23761	-0.862329	120.87	23.113	26.8091	25.9117	27.2249	26.5166	26.5849	25.6036	-1			12	12	12	876070000	54	34
O75052	O75052	Carboxyl-terminal PDZ ligand of neuronal nitric oxide synthase protein	NOS1AP	0.674628	-1.40943	56.149	2.2796	24.0311	23.5001	23.6197	20.8632	24.5942	23.6535	-1			2	2	2	138750000	30	5
O75061	O75061	Putative tyrosine-protein phosphatase auxilin	DNAJC6	0.831774	-0.791693	99.995	2.1037	24.3574	22.6044	24.3176	23.8883	23.6514	23.4586	-1			3	3	3	196390000	36	5
O75083	O75083	WD repeat-containing protein 1	WDR1	1.01996	-1.12934	66.193	39.199	26.2028	25.0038	27.5377	25.8336	26.623	26.138	-1			12	12	12	1236700000	37	52
O75113	O75113	NEDD4-binding protein 1	N4BP1	0.868193	-1.61562	100.38	6.3658	25.016	24.5678	25.4941	21.9612	25.3435	24.4778	-1			8	8	8	275560000	48	7
O75116	O75116	Rho-associated protein kinase 2	ROCK2	0.0778308	-0.343641	160.9	3.3816	22.0244	24.9598	23.8297	20.1511	23.8784	23.5907	-1			3	3	3	175400000	94	7
Q6P2H3	Q6P2H3	Centrosomal protein of 85 kDa	CEP85	2.4129	0.92312	85.638	296.96	27.8183	28.6609	27.6405	28.941	28.0762	28.7024	-1	+	BicD2_Trbo_RFP-Trbo	17	17	17	5172700000	40	173
O75131;Q96FN4;Q8IYJ1;Q96A23;O95741;Q86YQ8;Q9HCH3;Q9UBL6	O75131	Copine-3	CPNE3	0.121953	-0.198451	60.13	18.438	26.4565	25.7504	27.4905	27.0568	25.9291	26.4736	-1			9	9	9	1279500000	26	70
Q68DQ2	Q68DQ2	Very large A-kinase anchor protein	CRYBG3	2.36633	0.920154	330.63	93.818	27.8694	28.8566	27.6943	28.4035	27.7825	28.8466	-1	+	BicD2_Trbo_RFP-Trbo	44	44	44	3802100000	178	150
O75153;Q9Y5I4	O75153	Clustered mitochondria protein homolog	CLUH	0.298921	-0.324488	146.67	23.564	26.3754	25.4883	26.9982	26.3344	26.0613	26.6388	-1			14	14	14	1049600000	73	47
O75161	O75161	Nephrocystin-4	NPHP4	0.963729	-0.821959	157.6	2.3915	23.3113	22.4877	23.024	23.1279	24.0907	22.3446	-1			1	1	1	53972000	75	0
O75165	O75165	DnaJ homolog subfamily C member 13	DNAJC13	0.669246	-0.191957	254.41	68.089	28.1698	27.7236	27.8416	27.8551	28.1363	27.9932	-1			35	35	35	2638200000	124	123
O75170	O75170	Serine/threonine-protein phosphatase 6 regulatory subunit 2	PPP6R2	0.175328	-0.499725	104.94	2.7106	23.369	20.5489	22.464	22.8623	23.193	24.1155	-1			2	2	2	55715000	53	2
O75175	O75175	CCR4-NOT transcription complex subunit 3	CNOT3	0.0851055	-0.0454839	81.871	73.599	27.7076	27.2535	27.5207	27.6407	27.1891	27.3868	-1			14	14	14	2560600000	22	105
O75179	O75179	Ankyrin repeat domain-containing protein 17	ANKRD17	0.8066	-0.41724	274.25	74.442	28.42	27.4064	28.0685	27.8891	27.7483	27.6895	-1			36	21	21	2695000000	89	138
O75190	O75190	DnaJ homolog subfamily B member 6	DNAJB6	1.24061	-0.669597	36.087	10.665	25.6834	24.8509	26.1343	25.0311	25.4823	25.4093	-1			3	3	3	488030000	14	17
O75223	O75223	Gamma-glutamylcyclotransferase	GGCT	0.749665	0.924714	21.007	8.5029	23.0391	23.8694	23.8198	23.5089	22.8468	25.1015	-1			3	3	3	245170000	14	11
O75251	O75251	NADH dehydrogenase [ubiquinone] iron-sulfur protein 7, mitochondrial	NDUFS7	0.452004	-1.29004	23.563	1.5847	21.9669	20.1744	24.4682	23.5796	23.4568	22.2678	-1			2	2	2	127380000	14	7
O75306	O75306	NADH dehydrogenase [ubiquinone] iron-sulfur protein 2, mitochondrial	NDUFS2	0.576958	-0.633031	52.545	10.963	23.8423	22.8421	24.7122	23.7548	24.2162	24.2747	-1			5	5	5	306590000	27	13
P06133;O75310	P06133;O75310	UDP-glucuronosyltransferase 2B4;UDP-glucuronosyltransferase 2B11	UGT2B4;UGT2B11	0.216699	-0.549143	60.512	1.7841	21.5511	19.6779	22.2724	22.54	22.5113	22.4695	-1			1	1	1	43468000	25	1
P11498	P11498	Pyruvate carboxylase, mitochondrial	PC	5.4713	0.891057	129.63	323.31	30.7101	31.622	30.7855	31.6492	30.759	31.6566	-1	+	BicD2_Trbo_RFP-Trbo	47	47	47	34172000000	69	758
O75340	O75340	Programmed cell death protein 6	PDCD6	0.733481	1.23677	21.868	4.5727	24.3467	23.7537	21.9867	24.4962	22.283	24.0768	-1			3	3	3	248740000	10	19
O75347	O75347	Tubulin-specific chaperone A	TBCA	0.0902534	-0.121806	12.855	10.55	26.669	26.2875	27.7475	27.2834	26.5932	27.0734	-1			6	6	6	1647700000	7	46
O75348;O95670	O75348;O95670	V-type proton ATPase subunit G 1;V-type proton ATPase subunit G 2	ATP6V1G1;ATP6V1G2	0.0983873	0.150635	13.757	14.5	23.4413	24.1781	25.074	24.9345	24.7821	24.6367	-1			2	2	2	302410000	6	16
O75351;Q6PIW4	O75351	Vacuolar protein sorting-associated protein 4B	VPS4B	0.495454	-1.3207	49.301	3.2424	24.0605	21.1517	25.4966	24.5773	23.5414	23.4076	-1			5	3	3	153360000	27	5
O75352	O75352	Mannose-P-dolichol utilization defect 1 protein	MPDU1	0.0819578	0.0801048	26.638	3.2438	24.654	24.0751	24.57	24.4962	23.692	24.585	-1			2	2	2	289960000	5	14
O75367	O75367	Core histone macro-H2A.1	H2AFY	0.0236435	0.100262	39.617	23.273	23.3388	26.2401	23.1536	22.0336	25.4269	23.9464	-1			9	9	7	420070000	19	18
O75369	O75369	Filamin-B	FLNB	0.43912	-0.287144	278.16	80.9	28.5983	27.6765	28.5029	28.3571	27.9807	28.1869	-1			39	32	30	3464900000	146	152
O75381	O75381	Peroxisomal membrane protein PEX14	PEX14	0.230378	-0.5099	41.236	3.5687	22.7941	21.7992	24.2964	24.0671	24.1596	23.8541	-1			1	1	1	123960000	17	2
O75390	O75390	Citrate synthase, mitochondrial	CS	0.131978	-0.194218	51.712	99.152	27.9282	27.4626	28.9833	28.9524	28.6256	28.5394	-1			16	16	16	4774700000	20	146
O75396	O75396	Vesicle-trafficking protein SEC22b	SEC22B	0.743216	-0.993232	24.74	40.433	27.296	25.3386	27.4672	27.304	27.753	26.8938	-1			5	5	5	1588300000	13	49
Q8TBC3	Q8TBC3	SH3KBP1-binding protein 1	SHKBP1	2.01449	0.889317	76.343	37.765	25.5025	26.6348	25.8321	26.3788	25.8989	26.8879	-1	+	BicD2_Trbo_RFP-Trbo	13	13	12	1208600000	37	52
O75410	O75410	Transforming acidic coiled-coil-containing protein 1	TACC1	0.000898226	0.0026226	87.793	4.1623	21.8691	23.6812	24.5959	22.4142	23.7319	24.1093	-1			5	4	4	172570000	47	5
O75419	O75419	Cell division control protein 45 homolog	CDC45	0.256768	-0.234706	65.568	2.3842	22.2843	21.4473	22.1372	22.0799	22.4708	22.6609	-1			2	2	2	27960000	24	4
O75420	O75420	PERQ amino acid-rich with GYF domain-containing protein 1	GIGYF1	1.10362	0.98012	114.6	15.506	23.6326	23.9897	23.6618	25.4175	23.6785	24.506	-1			8	8	8	440490000	50	17
O75436;Q4G0F5	O75436	Vacuolar protein sorting-associated protein 26A	VPS26A	0.432868	-0.315979	38.169	39.366	26.4498	26.0578	26.9651	26.9606	26.9385	26.3871	-1			10	10	10	1329400000	22	55
O75439	O75439	Mitochondrial-processing peptidase subunit beta	PMPCB	0.882787	-0.850948	54.366	17.169	25.2399	24.1117	26.0764	25.3517	25.7806	25.0807	-1			5	5	5	527630000	27	18
O75449	O75449	Katanin p60 ATPase-containing subunit A1	KATNA1	0.417762	-0.735586	55.964	5.2974	23.266	24.1077	25.3536	24.1174	25.6112	23.799	-1			6	6	5	422270000	33	15
O75475	O75475	PC4 and SFRS1-interacting protein	PSIP1	0.642781	-0.247431	60.103	4.585	24.0146	23.9082	23.6862	23.6501	24.1407	23.541	-1			1	1	1	192210000	37	12
O75489	O75489	NADH dehydrogenase [ubiquinone] iron-sulfur protein 3, mitochondrial	NDUFS3	1.24099	-0.825743	30.241	17.456	26.5697	25.3673	26.8093	25.5177	25.9577	25.9745	-1			7	7	7	865750000	20	61
O75494;Q8WXF0	O75494	Serine/arginine-rich splicing factor 10	SRSF10	0.911258	-0.868914	31.3	11.498	25.9164	24.8856	26.3259	26.1876	26.6534	25.2157	-1			4	4	4	506520000	14	18
O75506	O75506	Heat shock factor-binding protein 1	HSBP1	0.29734	0.660299	8.5435	13.744	22.8401	23.4589	24.6474	25.6558	24.7255	25.0793	-1			3	3	3	298700000	7	10
P56945	P56945	Breast cancer anti-estrogen resistance protein 1	BCAR1	1.44581	0.888809	93.371	14.643	22.4009	22.9881	22.6182	23.5988	22.7822	23.8808	-1	+	BicD2_Trbo_RFP-Trbo	3	3	3	83987000	44	7
O75531	O75531	Barrier-to-autointegration factor;Barrier-to-autointegration factor, N-terminally processed	BANF1	0.139768	-0.17263	10.058	13.771	29.1336	29.1486	28.1654	27.9079	28.7992	28.5237	-1			4	4	4	6406300000	7	60
Q9NRL3	Q9NRL3	Striatin-4	STRN4	1.4725	0.859107	80.595	28.548	24.6246	25.995	25.36	26.131	25.1719	25.6079	-1	+	BicD2_Trbo_RFP-Trbo	11	11	11	781750000	24	38
Q8WUM0	Q8WUM0	Nuclear pore complex protein Nup133	NUP133	1.93926	0.82299	128.98	190.48	28.1294	28.9581	28.144	28.5622	27.9237	29.1458	-1	+	BicD2_Trbo_RFP-Trbo	31	31	31	4413000000	62	175
O43303	O43303	Centriolar coiled-coil protein of 110 kDa	CCP110	1.70469	0.817243	113.42	24.296	25.9258	26.4603	25.1967	26.3132	25.5046	26.3054	-1	+	BicD2_Trbo_RFP-Trbo	10	10	10	980210000	62	32
Q9UKL0;Q9P2K3	Q9UKL0;Q9P2K3	REST corepressor 1;REST corepressor 3	RCOR1;RCOR3	1.36786	0.799936	53.327	1.9002	21.766	23.1944	22.5513	23.0307	22.5922	23.0843	-1	+	BicD2_Trbo_RFP-Trbo	3	3	3	118540000	29	3
O75608	O75608	Acyl-protein thioesterase 1	LYPLA1	0.307701	-0.417121	24.669	13.903	24.923	24.2826	24.4434	23.1712	24.2876	24.9489	-1			4	4	4	305180000	12	14
Q99871	Q99871	HAUS augmin-like complex subunit 7	HAUS7	1.58435	0.788481	40.778	31.509	25.5641	25.91	24.9878	26.3905	25.3194	25.9362	-1	+	BicD2_Trbo_RFP-Trbo	6	6	6	882820000	21	28
O75663	O75663	TIP41-like protein	TIPRL	0.894456	-2.06943	31.444	23.766	26.8263	25.4112	26.613	22.5018	26.6602	25.9782	-1			5	5	5	822860000	19	20
Q6UVJ0	Q6UVJ0	Spindle assembly abnormal protein 6 homolog	SASS6	1.62129	0.773803	74.396	27.991	26.4842	26.8669	26.1548	27.0319	25.7616	26.8232	-1	+	BicD2_Trbo_RFP-Trbo	14	14	14	1282600000	43	46
O75694	O75694	Nuclear pore complex protein Nup155	NUP155	0.00770852	0.00268237	155.2	46.287	27.2916	27.2571	27.207	27.3906	27.5516	27.4106	-1			20	20	20	1923300000	62	67
O75695	O75695	Protein XRP2	RP2	0.237898	0.483483	39.641	4.4789	24.8673	24.0173	22.1103	24.0522	23.7266	24.0851	-1			3	3	3	208310000	19	17
O75787	O75787	Renin receptor	ATP6AP2	1.06978	-1.15225	39.008	3.246	24.5922	23.7817	24.8764	24.1169	24.4034	22.5167	-1			1	1	1	152290000	17	7
Q13033	Q13033	Striatin-3	STRN3	1.3797	0.764257	87.208	6.5419	24.8055	24.9945	24.5443	25.3028	24.0164	25.3618	-1	+	BicD2_Trbo_RFP-Trbo	5	5	5	439660000	31	8
O75794	O75794	Cell division cycle protein 123 homolog	CDC123	0.473358	-0.403127	39.134	20.721	26.4253	25.5325	26.8747	26.5776	26.1495	26.13	-1			7	7	7	870640000	18	49
Q9H0B6	Q9H0B6	Kinesin light chain 2	KLC2	1.47329	0.699887	68.934	15.281	25.9552	27.0067	25.9499	26.2494	25.9601	26.7089	-1	+	BicD2_Trbo_RFP-Trbo	15	8	7	1067300000	39	38
O75817	O75817	Ribonuclease P protein subunit p20	POP7	0.76864	-0.649264	15.651	5.8318	25.5096	24.4147	25.6901	24.6607	24.4685	24.6449	-1			2	2	2	333410000	5	21
O75821	O75821	Eukaryotic translation initiation factor 3 subunit G	EIF3G	0.566711	-0.496726	35.611	133.15	28.2017	27.2285	28.7331	28.4039	28.3057	28.1178	-1			9	9	9	3116300000	20	99
O75822	O75822	Eukaryotic translation initiation factor 3 subunit J	EIF3J	0.300474	-0.346647	29.062	25.471	26.7993	25.6035	26.7042	27.224	26.7428	26.3789	-1			7	7	7	1101200000	16	53
O75828	O75828	Carbonyl reductase [NADPH] 3	CBR3	0.147785	0.451572	30.85	20.451	22.6153	23.1626	25.0292	26.119	24.6043	24.3219	-1			4	2	2	351880000	21	14
O75832	O75832	26S proteasome non-ATPase regulatory subunit 10	PSMD10	0.527694	-0.316681	24.428	37.822	26.4518	26.0543	27.0947	26.6144	26.6775	26.6053	-1			4	4	4	1190800000	13	28
O75844	O75844	CAAX prenyl protease 1 homolog	ZMPSTE24	0.118285	0.214018	54.812	1.6677	22.3638	21.9932	23.5865	23.6747	22.6629	23.5873	-1			1	1	1	95656000	21	4
O75874	O75874	Isocitrate dehydrogenase [NADP] cytoplasmic	IDH1	0.348822	-0.900857	46.659	14.779	24.8488	22.5791	26.0632	25.3468	25.5444	25.8279	-1			6	6	6	606630000	29	24
O75880	O75880	Protein SCO1 homolog, mitochondrial	SCO1	0.0147419	0.0272522	33.814	2.2454	23.8458	22.6082	22.8753	22.7706	21.8378	23.2618	-1			2	2	2	65410000	15	3
O75915	O75915	PRA1 family protein 3	ARL6IP5	0.756254	-1.02212	21.614	1.768	22.501	20.7917	23.4711	22.5464	22.728	22.2956	-1			1	1	1	59926000	6	2
O75934	O75934	Pre-mRNA-splicing factor SPF27	BCAS2	1.04381	-1.25472	26.131	2.2724	23.6377	22.4555	22.459	22.3613	23.7254	21.2411	-1			1	1	1	26921000	14	2
O75935	O75935	Dynactin subunit 3	DCTN3	0.323213	-0.850358	21.119	8.5562	23.2439	24.6926	24.7667	22.394	26.0226	24.3955	-1			5	5	5	446660000	13	20
O75937	O75937	DnaJ homolog subfamily C member 8	DNAJC8	0.50749	-0.701738	29.841	10.557	25.9496	24.3907	26.6656	26.1678	25.9971	25.9486	-1			5	5	5	757120000	15	45
O75940	O75940	Survival of motor neuron-related-splicing factor 30	SMNDC1	0.115801	-0.360768	26.711	3.9145	22.1344	22.9792	24.4496	21.0118	22.4689	23.9796	-1			2	2	2	89408000	11	5
O75947	O75947	ATP synthase subunit d, mitochondrial	ATP5H	0.285376	-0.67819	18.491	25.7	26.2406	24.9814	28.3197	27.3023	26.4532	26.6952	-1			8	8	8	1987100000	11	81
O75955	O75955	Flotillin-1	FLOT1	0.989732	-0.681666	47.355	93.496	28.4037	27.2171	28.748	27.9307	28.1507	28.1096	-1			18	18	18	3431900000	31	133
O60826	O60826	Coiled-coil domain-containing protein 22	CCDC22	1.38382	0.64212	70.755	15.476	23.9608	24.5265	24.337	25.1537	24.2928	24.8369	-1	+	BicD2_Trbo_RFP-Trbo	10	10	10	427650000	42	19
O75964	O75964	ATP synthase subunit g, mitochondrial	ATP5L	0.430815	-0.439527	11.428	5.7978	25.786	25.2879	26.8699	26.2171	26.3502	26.1825	-1			3	3	3	800700000	8	24
Q7Z4H7	Q7Z4H7	HAUS augmin-like complex subunit 6	HAUS6	1.60463	0.575789	108.62	140.24	27.8796	28.2204	27.8619	28.5123	28.0245	28.7607	-1	+	BicD2_Trbo_RFP-Trbo	26	26	26	4093400000	59	185
O76003	O76003	Glutaredoxin-3	GLRX3	0.408035	-0.640137	37.432	39.555	27.3189	25.903	28.1679	28.0095	27.6337	27.2876	-1			9	9	9	2525600000	19	82
Q15154	Q15154	Pericentriolar material 1 protein	PCM1	1.53827	0.558586	228.54	323.31	28.8244	29.4904	29.3178	29.7812	29.136	29.6824	-1	+	BicD2_Trbo_RFP-Trbo	61	61	61	18168000000	96	484
O76031	O76031	ATP-dependent Clp protease ATP-binding subunit clpX-like, mitochondrial	CLPX	0.200091	0.375626	69.223	4.1765	22.9598	24.0449	25.0021	25.2833	24.4641	24.2246	-1			5	5	5	318580000	44	4
O76071	O76071	Probable cytosolic iron-sulfur protein assembly protein CIAO1	CIAO1	0.395148	-0.686239	37.84	2.8405	23.4085	22.6871	25.2333	24.24	24.5154	24.1713	-1			3	3	3	219210000	17	2
Q68CZ6	Q68CZ6	HAUS augmin-like complex subunit 3	HAUS3	1.60647	0.478466	69.65	83.858	27.8519	28.2682	27.5796	28.322	28.0459	28.3226	-1	+	BicD2_Trbo_RFP-Trbo	21	21	21	3595400000	40	166
O94760	O94760	N(G),N(G)-dimethylarginine dimethylaminohydrolase 1	DDAH1	0.37083	0.553863	31.121	2.9318	22.8956	23.1559	23.3414	24.266	22.0721	22.5488	-1			4	4	4	173330000	18	2
O94763	O94763	Unconventional prefoldin RPB5 interactor 1	URI1	1.01961	-0.636061	59.832	15.056	26.4175	25.9894	26.8237	25.3962	26.1608	26.1083	-1			7	7	7	770660000	26	37
Q86X83	Q86X83	COMM domain-containing protein 2	COMMD2	1.37233	0.461973	22.745	8.435	24.2703	24.6972	23.9354	24.6385	24.4671	24.723	-1	+	BicD2_Trbo_RFP-Trbo	6	6	6	391040000	12	14
O94822	O94822	E3 ubiquitin-protein ligase listerin	LTN1	1.3009	-1.91375	200.55	4.2845	23.8479	20.395	23.8137	21.9854	22.768	22.308	-1			5	5	5	66919000	97	5
Q8N6T3	Q8N6T3	ADP-ribosylation factor GTPase-activating protein 1	ARFGAP1	1.42743	0.458427	44.667	88.001	27.9744	28.1582	28.0439	28.4248	27.6972	28.5078	-1	+	BicD2_Trbo_RFP-Trbo	11	11	11	3065700000	23	113
O94868	O94868	F-BAR and double SH3 domains protein 2	FCHSD2	0.393812	-1.10342	84.275	2.2857	24.6813	22.9721	22.0487	22.7608	22.581	20.2678	-1			2	2	2	37515000	45	2
Q99567	Q99567	Nuclear pore complex protein Nup88	NUP88	2.14829	0.456113	83.541	201.05	28.4956	29.0194	28.6206	28.9541	28.6818	29.1928	-1	+	BicD2_Trbo_RFP-Trbo	17	17	17	4774600000	37	165
O94887	O94887	FERM, RhoGEF and pleckstrin domain-containing protein 2	FARP2	0.531738	-0.716867	119.89	5.8515	23.3966	23.5204	22.7804	22.6623	24.2274	22.0711	-1			3	3	3	162000000	65	2
Q96PY6	Q96PY6	Serine/threonine-protein kinase Nek1	NEK1	1.78049	0.427467	142.83	171.25	28.1219	28.3577	27.82	28.4976	27.921	28.29	-1	+	BicD2_Trbo_RFP-Trbo	29	29	29	4068000000	75	177
O94906	O94906	Pre-mRNA-processing factor 6	PRPF6	0.370316	-0.31888	106.92	3.7061	24.3454	23.6219	24.577	24.0943	24.5815	24.8312	-1			6	6	6	173060000	63	3
O94927	O94927	HAUS augmin-like complex subunit 5	HAUS5	0.28905	0.247269	71.682	72.66	28.1734	27.7298	27.6883	28.2008	27.0974	27.7702	-1			20	20	20	2673600000	38	140
O94964;Q5TF21	O94964	Protein SOGA1;N-terminal form;C-terminal 80 kDa form	SOGA1	0.195003	0.508748	159.76	71.561	22.3278	23.4761	24.1591	22.1378	22.5842	24.9835	-1			34	34	33	1502500000	98	82
P33981	P33981	Dual specificity protein kinase TTK	TTK	1.9228	0.406682	97.071	160.71	28.1209	28.4298	27.863	28.5103	28.1068	28.3706	-1	+	BicD2_Trbo_RFP-Trbo	23	23	23	4438100000	49	190
O94986	O94986	Centrosomal protein of 152 kDa	CEP152	1.1728	3.03995	195.62	15.593	22.3008	26.4903	21.4453	23.9482	24.2754	26.7028	-1			8	8	8	351360000	111	14
O95163	O95163	Elongator complex protein 1	IKBKAP	0.934076	-0.170382	150.25	57.905	28.0427	27.9598	28.2941	28.054	28.1074	27.9193	-1			24	24	24	3213200000	63	130
O95168	O95168	NADH dehydrogenase [ubiquinone] 1 beta subcomplex subunit 4	NDUFB4	0.0391788	0.0226955	15.208	5.0214	24.3145	24.4422	24.8346	24.6264	24.7063	24.8549	-1			2	2	2	267460000	8	16
O95197	O95197	Reticulon-3	RTN3	0.85681	-1.0037	112.61	2.5784	24.8335	23.1355	25.3741	24.7275	25.3092	24.6428	-1			1	1	1	312440000	45	19
O95202	O95202	LETM1 and EF-hand domain-containing protein 1, mitochondrial	LETM1	0.0996344	-0.229977	83.353	4.5994	23.8843	24.2748	25.3315	23.4695	22.632	23.4135	-1			5	5	5	344630000	46	7
O95218	O95218	Zinc finger Ran-binding domain-containing protein 2	ZRANB2	1.1563	-1.46817	37.404	1.5975	22.6605	22.3125	24.6929	22.406	23.8724	22.1026	-1			3	3	3	102380000	19	2
O95219	O95219	Sorting nexin-4	SNX4	0.922237	-1.0526	51.908	9.7004	26.5516	24.4746	25.2531	24.315	24.8054	24.6628	-1			5	5	5	408550000	27	15
O95229	O95229	ZW10 interactor	ZWINT	0.239285	0.277246	31.293	7.5748	24.7835	24.4663	24.5065	24.487	24.6562	25.8247	-1			5	5	5	584880000	14	20
O95232	O95232	Luc7-like protein 3	LUC7L3	0.757038	-1.41721	51.466	20.006	26.4847	23.5361	26.7171	26.4286	26.5894	25.5749	-1			6	6	6	797240000	21	44
O95239;Q2VIQ3	O95239;Q2VIQ3	Chromosome-associated kinesin KIF4A;Chromosome-associated kinesin KIF4B	KIF4A;KIF4B	0.0409194	-0.140334	139.88	2.1123	23.0983	21.2814	24.2848	23.0122	21.3861	24.0546	-1			2	2	2	80861000	74	3
O95249	O95249	Golgi SNAP receptor complex member 1	GOSR1	0.502207	-1.18025	28.612	2.9447	24.3353	23.5365	23.8306	20.6836	23.327	23.7321	-1			1	1	1	105720000	20	2
O95292	O95292	Vesicle-associated membrane protein-associated protein B/C	VAPB	1.29858	-1.93627	27.228	26.897	27.577	26.3036	27.0276	26.0799	27.8118	24.2242	-1			5	5	4	1451300000	15	33
O95295	O95295	SNARE-associated protein Snapin	SNAPIN	0.0216668	-0.0227776	14.874	10.035	24.6025	24.9279	25.3549	25.5551	25.3058	24.7119	-1			4	4	4	364800000	9	15
O95299	O95299	NADH dehydrogenase [ubiquinone] 1 alpha subcomplex subunit 10, mitochondrial	NDUFA10	0.228421	0.665918	40.75	12.494	24.3444	24.3767	25.9086	25.8863	22.3717	24.3594	-1			3	3	3	365950000	23	19
O95336	O95336	6-phosphogluconolactonase	PGLS	0.662036	1.30108	27.547	13.039	22.9379	24.4374	25.3597	26.284	24.2824	25.7619	-1			8	8	8	580480000	14	22
O95347	O95347	Structural maintenance of chromosomes protein 2	SMC2	0.472853	-0.214802	135.65	38.171	27.2138	26.6701	27.3145	27.3271	27.1332	27.02	-1			21	21	21	1732700000	75	71
O95359	O95359	Transforming acidic coiled-coil-containing protein 2	TACC2	1.27046	-0.471823	309.42	31	26.7163	26.4935	26.766	25.9259	26.5689	26.2163	-1			8	8	7	887470000	141	30
Q9Y6A5	Q9Y6A5	Transforming acidic coiled-coil-containing protein 3	TACC3	2.37462	0.38704	90.359	55.602	27.3131	27.6497	27.2596	27.7086	27.4259	27.8015	-1	+	BicD2_Trbo_RFP-Trbo	10	10	10	2196000000	44	90
O95373	O95373	Importin-7	IPO7	0.952373	-0.522775	119.52	82.333	28.4427	27.7932	28.6245	28.4752	28.443	27.6736	-1			18	18	17	3945000000	45	155
O95394	O95394	Phosphoacetylglucosamine mutase	PGM3	0.526644	-0.469593	59.851	19.148	25.1548	25.2531	26.1637	25.6593	26.3576	25.3549	-1			8	8	8	834660000	30	41
O95399	O95399	Urotensin-2	UTS2	0.265591	1.18605	14.295	2.6606	26.4406	25.6696	26.7919	26.3626	21.3072	26.0657	-1			1	1	1	837760000	8	17
P35658	P35658	Nuclear pore complex protein Nup214	NUP214	1.51135	0.368071	213.62	255.07	29.4464	29.8004	29.5846	30.089	29.7083	29.9541	-1	+	BicD2_Trbo_RFP-Trbo	37	37	37	9286500000	68	341
Q96A49	Q96A49	Synapse-associated protein 1	SYAP1	1.98288	0.329921	39.933	323.31	30.3353	30.6807	30.457	30.7191	30.4834	30.8656	-1	+	BicD2_Trbo_RFP-Trbo	15	15	15	19816000000	17	369
O95433	O95433	Activator of 90 kDa heat shock protein ATPase homolog 1	AHSA1	0.686465	-0.572399	38.274	110.32	28.0579	27.4572	28.8124	28.4452	28.3431	27.5938	-1			10	10	10	3442200000	24	101
O95456	O95456	Proteasome assembly chaperone 1	PSMG1	0.347702	-0.370066	32.854	6.581	25.4522	24.5834	25.3674	25.54	24.7147	24.3006	-1			5	5	5	469880000	17	20
O95470	O95470	Sphingosine-1-phosphate lyase 1	SGPL1	0.203472	0.645219	63.523	2.4268	22.8471	21.5655	22.6653	25.4463	21.8856	22.3219	-1			3	3	3	101600000	30	3
Q9BRR8	Q9BRR8	G patch domain-containing protein 1	GPATCH1	1.69301	0.25668	103.34	142.67	28.9811	29.3684	29.1224	29.3735	29.2163	29.3479	-1	+	BicD2_Trbo_RFP-Trbo	25	25	25	6405600000	44	240
O60271;Q9UPT6	O60271	C-Jun-amino-terminal kinase-interacting protein 4	SPAG9	1.32897	0.141708	146.2	174.63	29.3164	29.4913	29.4608	29.5817	29.4131	29.5424	-1	+	BicD2_Trbo_RFP-Trbo	36	36	36	7942200000	76	287
P27816	P27816	Microtubule-associated protein 4	MAP4	2.40463	-0.201437	121	323.31	31.7376	31.4981	31.7935	31.582	31.7281	31.5747	-1	+	BicD2_Trbo_RFP-Trbo	40	40	40	34344000000	66	669
O95573	O95573	Long-chain-fatty-acid--CoA ligase 3	ACSL3	0.251767	0.45864	80.419	11.134	24.4591	25.8374	26.8991	26.3712	25.7139	26.2394	-1			8	8	6	782440000	36	23
Q6ULP2	Q6ULP2	Aftiphilin	AFTPH	1.96351	-0.276751	102.11	169.93	29.4738	29.0322	29.2998	29.1398	29.3597	29.131	-1	+	BicD2_Trbo_RFP-Trbo	20	20	20	6855900000	42	240
O95613	O95613	Pericentrin	PCNT	0.218541	0.156055	378.03	217.78	26.9982	27.2566	27.6339	27.4357	26.7416	27.1496	-1			61	61	61	3957100000	226	155
Q9Y4I1	Q9Y4I1	Unconventional myosin-Va	MYO5A	1.66257	-0.363654	215.4	281.03	28.878	28.6807	28.7922	28.4611	28.9447	28.3822	-1	+	BicD2_Trbo_RFP-Trbo	53	53	45	8884800000	119	392
O95684	O95684	FGFR1 oncogene partner	FGFR1OP	0.437957	0.171232	43.064	175.56	28.1397	27.9621	28.0211	28.2669	28.0846	28.5301	-1			11	11	11	3976800000	17	110
Q14258	Q14258	E3 ubiquitin/ISG15 ligase TRIM25	TRIM25	2.09171	-0.367968	70.973	172.19	30.1867	29.8038	30.1985	29.759	29.9847	29.7032	-1	+	BicD2_Trbo_RFP-Trbo	25	25	25	10756000000	38	345
O95721	O95721	Synaptosomal-associated protein 29	SNAP29	1.24448	-1.58679	28.97	6.3341	26.0396	23.4161	24.7545	23.1313	25.1539	24.6401	-1			5	5	5	388540000	17	29
O95747	O95747	Serine/threonine-protein kinase OSR1	OXSR1	0.147233	-0.279672	58.022	1.9928	23.6933	21.4834	22.3419	22.9297	22.598	23.3811	-1			2	2	2	115070000	28	4
O95757	O95757	Heat shock 70 kDa protein 4L	HSPA4L	0.932941	-0.535167	94.511	25.132	26.393	25.6788	26.938	26.2921	26.6031	26.3577	-1			16	13	13	1010900000	61	36
Q8IWZ3	Q8IWZ3	Ankyrin repeat and KH domain-containing protein 1	ANKHD1	1.73055	-0.378722	269.45	264.15	29.7395	29.5111	29.829	29.4879	29.7806	29.214	-1	+	BicD2_Trbo_RFP-Trbo	43	43	28	9044200000	91	393
Q9Y5K6	Q9Y5K6	CD2-associated protein	CD2AP	2.34719	-0.3955	71.45	323.31	31.6167	31.1727	31.4117	31.0874	31.5804	31.1622	-1	+	BicD2_Trbo_RFP-Trbo	26	26	26	27442000000	43	516
Q9NQC7	Q9NQC7	Ubiquitin carboxyl-terminal hydrolase CYLD	CYLD	1.7445	-0.428176	107.31	193.84	30.2076	29.6379	30.3501	29.9704	30.1744	29.8392	-1	+	BicD2_Trbo_RFP-Trbo	35	35	35	10743000000	53	424
O95801	O95801	Tetratricopeptide repeat protein 4	TTC4	1.07872	-2.56836	44.678	24.518	26.1633	23.7956	26.2237	24.9261	25.3124	21.2726	-1			5	5	5	381660000	22	14
P78406	P78406	mRNA export factor	RAE1	2.1725	-0.439229	40.968	54.243	27.4367	26.9875	27.6063	27.2207	27.5747	27.0918	-1	+	BicD2_Trbo_RFP-Trbo	10	10	10	1551400000	19	59
P62913	P62913	60S ribosomal protein L11	RPL11	2.41769	-0.451595	20.252	150.76	30.7376	30.1821	30.7569	30.4164	30.6854	30.2266	-1	+	BicD2_Trbo_RFP-Trbo	6	6	6	17216000000	9	165
O95831	O95831	Apoptosis-inducing factor 1, mitochondrial	AIFM1	0.0285541	-0.0301107	66.9	93.071	28.1312	27.8083	28.752	28.7083	27.9587	28.235	-1			19	19	19	3957400000	32	177
Q9NVI7	Q9NVI7	ATPase family AAA domain-containing protein 3A	ATAD3A	1.5235	-0.461204	71.368	323.31	30.764	30.3606	31.0858	30.6505	30.8709	30.326	-1	+	BicD2_Trbo_RFP-Trbo	26	26	8	23540000000	45	488
O95861	O95861	3(2),5-bisphosphate nucleotidase 1	BPNT1	0.378411	-1.46656	33.392	6.5243	24.5968	20.5098	25.7482	25.6375	25.0353	24.8333	-1			5	5	5	442580000	23	14
O95881	O95881	Thioredoxin domain-containing protein 12	TXNDC12	0.181922	-0.36344	19.206	7.4203	24.851	24.0088	26.5224	25.5836	24.8548	25.5455	-1			6	6	6	521460000	13	25
P14923	P14923	Junction plakoglobin	JUP	2.0271	-0.464003	81.744	172.9	29.7281	29.1049	29.6348	29.3088	29.8237	29.3808	-1	+	BicD2_Trbo_RFP-Trbo	28	28	24	9379200000	44	273
O95983	O95983	Methyl-CpG-binding domain protein 3	MBD3	0.497662	-1.19231	32.844	4.4912	23.7593	20.7561	23.8156	21.5637	21.8411	23.5192	-1			3	3	3	87952000	19	3
Q9UPR3	Q9UPR3	Protein SMG5	SMG5	1.41219	-0.465459	113.93	16.948	26.1318	25.8394	26.2615	25.4321	25.923	25.6484	-1	+	BicD2_Trbo_RFP-Trbo	10	10	10	674290000	43	41
O96000	O96000	NADH dehydrogenase [ubiquinone] 1 beta subcomplex subunit 10	NDUFB10	0.264093	-0.202689	20.776	2.2973	24.0186	23.5377	24.5819	24.088	23.9592	24.3259	-1			1	1	1	202070000	12	10
O96007	O96007	Molybdopterin synthase catalytic subunit	MOCS2	1.24926	-1.997	20.944	2.8775	24.6922	21.0779	24.4505	23.1773	24.542	23.4385	-1			1	1	1	167160000	13	3
P52907	P52907	F-actin-capping protein subunit alpha-1	CAPZA1	1.82578	-0.471125	32.922	323.31	30.7456	30.3395	31.1001	30.4935	30.8419	30.4412	-1	+	BicD2_Trbo_RFP-Trbo	13	11	11	19916000000	16	269
P60174	P60174	Triosephosphate isomerase	TPI1	1.35263	-0.472188	26.669	133.54	29.0852	28.2359	28.5844	28.4017	28.6635	28.2789	-1	+	BicD2_Trbo_RFP-Trbo	15	15	15	5299500000	16	191
O96019;O94805	O96019	Actin-like protein 6A	ACTL6A	0.517521	-0.877913	47.46	9.0507	24.4225	24.6834	26.2631	25.4651	25.8568	23.7602	-1			4	4	4	367780000	20	14
Q8IX90	Q8IX90	Spindle and kinetochore-associated protein 3	SKA3	2.19168	-0.486196	46.359	131.69	29.3246	28.7929	29.2304	28.8871	29.1861	28.6025	-1	+	BicD2_Trbo_RFP-Trbo	19	19	19	5852600000	25	239
P00338	P00338	L-lactate dehydrogenase A chain	LDHA	0.186703	-0.236199	36.688	154.61	30.2459	29.5545	30.9915	31.0188	30.6073	30.5628	-1			16	15	15	19721000000	24	278
P00367;P49448	P00367;P49448	Glutamate dehydrogenase 1, mitochondrial;Glutamate dehydrogenase 2, mitochondrial	GLUD1;GLUD2	0.0400803	0.0452137	61.397	10.806	25.6783	25.0228	25.9361	26.1488	25.3662	25.9447	-1			7	7	7	682890000	35	38
P00374	P00374	Dihydrofolate reductase	DHFR	1.11214	-1.34739	21.452	2.9855	24.6971	23.835	25.2389	22.4671	24.6548	24.2464	-1			1	1	1	264050000	14	11
P00387	P00387	NADH-cytochrome b5 reductase 3;NADH-cytochrome b5 reductase 3 membrane-bound form;NADH-cytochrome b5 reductase 3 soluble form	CYB5R3	1.07331	-1.24294	34.234	55.025	27.7869	25.6083	28.1907	27.0596	27.6879	27.2688	-1			9	9	9	2422800000	16	91
P00390	P00390	Glutathione reductase, mitochondrial	GSR	0.740506	-0.475387	56.256	52.855	26.8503	26.1691	27.4138	26.5167	26.7272	26.8794	-1			10	10	10	1666400000	27	58
P00403	P00403	Cytochrome c oxidase subunit 2	MT-CO2	0.30825	-0.216773	25.565	9.2878	25.9629	25.3964	26.33	26.2423	26.1352	26.1391	-1			5	5	5	842910000	6	27
P00441	P00441	Superoxide dismutase [Cu-Zn]	SOD1	0.795623	-0.764989	15.936	323.31	29.6642	28.6043	30.4398	29.8827	30.1987	29.5207	-1			6	6	6	14252000000	11	128
P00491	P00491	Purine nucleoside phosphorylase	PNP	0.366947	-0.326284	32.118	176.82	28.6294	27.9089	29.2579	28.9086	28.6022	28.6932	-1			13	13	13	5037400000	22	191
P00492	P00492	Hypoxanthine-guanine phosphoribosyltransferase	HPRT1	0.0430336	-0.0526212	24.579	82.872	28.477	28.2646	29.3669	29.3041	29.0474	29.1647	-1			12	12	12	6519400000	13	174
P00505	P00505	Aspartate aminotransferase, mitochondrial	GOT2	0.240179	-1.14658	47.517	14.538	27.0015	26.474	23.4259	22.38	23.6178	21.7515	-1			7	7	7	478710000	29	19
P00558	P00558	Phosphoglycerate kinase 1	PGK1	0.156154	-0.203797	44.614	323.31	30.3657	29.6808	31.1272	31.0849	30.751	30.8669	-1			23	23	19	22381000000	30	499
P00568	P00568	Adenylate kinase isoenzyme 1	AK1	0.272377	-0.657657	21.635	10.116	24.5091	22.2129	25.1384	24.4221	22.7659	23.8054	-1			3	3	3	167080000	15	7
P00846	P00846	ATP synthase subunit a	MT-ATP6	0.536514	-0.961282	24.817	7.3359	24.1808	23.9666	25.5944	24.9815	24.7091	22.6524	-1			1	1	1	325300000	3	14
P00918	P00918	Carbonic anhydrase 2	CA2	0.451907	-1.18317	29.246	7.3427	24.9482	21.3038	21.5756	21.9501	23.5008	23.2212	-1			4	4	4	194610000	16	7
P00966	P00966	Argininosuccinate synthase	ASS1	0.399343	-1.01615	46.53	4.0119	24.2641	21.1426	23.0303	21.7576	23.0442	24.3901	-1			3	3	3	153600000	25	7
P01116;P01112;P01111	P01116;P01112;P01111	GTPase KRas;GTPase KRas, N-terminally processed;GTPase HRas;GTPase HRas, N-terminally processed;GTPase NRas	KRAS;HRAS;NRAS	0.960995	-2.46758	21.656	16.516	25.5683	21.0459	25.7696	25.1987	25.4579	23.1483	-1			2	2	2	419740000	11	14
P02545	P02545	Prelamin-A/C;Lamin-A/C	LMNA	0.570765	-1.46295	74.139	3.4338	23.8651	24.0963	25.7948	21.4411	24.9335	24.6673	-1			5	5	5	245010000	44	8
P02786	P02786	Transferrin receptor protein 1;Transferrin receptor protein 1, serum form	TFRC	0.243116	-0.421702	84.87	8.3145	25.3383	24.0094	26.1884	25.9952	25.5727	25.8296	-1			9	9	9	617830000	48	18
P0CF51;P03986	P0CF51;P03986	T-cell receptor gamma chain C region 1;T-cell receptor gamma-2 chain C region	TRGC1;TRGC2	0.560705	-0.371115	19.804	2.2839	22.8253	21.9936	22.4519	21.8703	22.4122	22.7123	-1			1	1	1	35954000	12	2
P04049	P04049	RAF proto-oncogene serine/threonine-protein kinase	RAF1	0.418438	-0.285852	73.051	2.4457	22.0748	22.3016	22.3536	22.3436	22.8443	21.7699	-1			5	2	2	17527000	43	2
P04075	P04075	Fructose-bisphosphate aldolase A	ALDOA	0.240431	-0.235524	39.42	234.06	31.4388	30.7647	31.9724	31.9457	31.6405	31.6347	-1			19	19	17	39658000000	23	471
P04080	P04080	Cystatin-B	CSTB	0.602605	-0.954032	11.139	4.4972	24.1631	22.567	25.0663	22.9106	23.2443	24.1341	-1			2	2	2	221540000	6	8
P12236	P12236	ADP/ATP translocase 3;ADP/ATP translocase 3, N-terminally processed	SLC25A6	2.03352	-0.500549	32.866	92.107	30.9011	30.2836	30.9586	30.3775	30.938	30.6349	-1	+	BicD2_Trbo_RFP-Trbo	17	17	5	23261000000	22	275
P04150	P04150	Glucocorticoid receptor	NR3C1	0.500405	-0.470198	85.658	9.2164	26.0006	25.7931	26.331	24.9388	26.1176	26.3068	-1			7	7	7	554220000	42	27
P04181	P04181	Ornithine aminotransferase, mitochondrial;Ornithine aminotransferase, hepatic form;Ornithine aminotransferase, renal form	OAT	0.268655	-0.329905	48.534	116.58	28.7818	28.3364	29.725	29.7148	29.2775	28.7434	-1			15	15	15	8267300000	24	205
P15924	P15924	Desmoplakin	DSP	1.77485	-0.500852	331.77	233.24	30.0212	29.2605	29.9146	29.6832	30.0061	29.4956	-1	+	BicD2_Trbo_RFP-Trbo	64	64	64	11161000000	204	452
P04350	P04350	Tubulin beta-4A chain	TUBB4A	0.306177	-0.175465	49.585	5.3889	25.1087	24.7842	25.5127	25.2536	24.8698	24.927	-1			20	2	0	393350000	21	13
P04406;O14556	P04406	Glyceraldehyde-3-phosphate dehydrogenase	GAPDH	0.240743	-0.271787	36.053	323.31	33.3048	32.7931	34.2283	33.9994	33.6834	33.6087	-1			18	18	18	162800000000	20	830
P04439	P04439	HLA class I histocompatibility antigen, A-3 alpha chain	HLA-A	0.223713	-0.641763	40.84	6.3511	25.8219	25.3193	23.8992	23.9326	23.6914	22.2353	-1			4	3	2	267390000	21	10
P04632;Q96L46	P04632	Calpain small subunit 1	CAPNS1	0.0258065	0.11371	28.315	9.8441	25.0554	22.0363	20.9288	24.2438	24.306	24.3511	-1			6	6	6	265640000	14	24
Q9NR30	Q9NR30	Nucleolar RNA helicase 2	DDX21	1.4506	-0.50456	87.343	140.54	29.2461	28.7458	29.4754	29.1673	29.6032	28.8978	-1	+	BicD2_Trbo_RFP-Trbo	29	29	27	7538200000	43	314
P04818	P04818	Thymidylate synthase	TYMS	0.592103	-0.542379	35.716	20.981	26.0847	25.2513	26.7137	26.4834	26.225	25.6614	-1			5	5	5	641330000	18	30
P04843	P04843	Dolichyl-diphosphooligosaccharide--protein glycosyltransferase subunit 1	RPN1	0.852762	-0.602374	68.569	181.18	29.6127	29.0264	30.4122	29.8166	30.1328	29.5076	-1			24	24	24	10578000000	40	281
P04844	P04844	Dolichyl-diphosphooligosaccharide--protein glycosyltransferase subunit 2	RPN2	0.665306	-0.491997	69.283	86.957	27.6338	27.0107	28.4285	27.7808	27.8328	27.6276	-1			13	13	13	2783900000	25	138
Q9HCS7	Q9HCS7	Pre-mRNA-splicing factor SYF1	XAB2	1.86236	-0.51299	100.01	36.539	27.5633	26.908	27.7204	27.2868	27.6387	27.1886	-1	+	BicD2_Trbo_RFP-Trbo	18	18	18	1527600000	56	65
Q99878;Q96KK5;Q9BTM1;Q16777;Q93077;Q7L7L0;Q6FI13;P20671;P0C0S8;P04908;Q96QV6;P16104	Q99878;Q96KK5;Q9BTM1;Q16777;Q93077;Q7L7L0;Q6FI13;P20671;P0C0S8;P04908;Q96QV6;P16104	Histone H2A type 1-J;Histone H2A type 1-H;Histone H2A.J;Histone H2A type 2-C;Histone H2A type 1-C;Histone H2A type 3;Histone H2A type 2-A;Histone H2A type 1-D;Histone H2A type 1;Histone H2A type 1-B/E;Histone H2A type 1-A;Histone H2AX	HIST1H2AJ;HIST1H2AH;H2AFJ;HIST2H2AC;HIST1H2AC;HIST3H2A;HIST2H2AA3;HIST1H2AD;HIST1H2AG;HIST1H2AB;HIST1H2AA;H2AFX	0.0330432	-0.0825551	13.936	35.078	29.3698	31.2126	29.8887	28.62	30.7055	29.8837	-1			4	4	1	16213000000	7	70
P05023;P13637;P50993;Q13733;P20648;P54707	P05023	Sodium/potassium-transporting ATPase subunit alpha-1	ATP1A1	0.794827	-0.425789	112.89	176.67	29.2819	28.626	29.7288	29.289	29.3692	29.1875	-1			24	24	24	7355300000	51	287
P05091	P05091	Aldehyde dehydrogenase, mitochondrial	ALDH2	0.0579942	0.230047	56.381	6.3161	22.6514	21.6623	25.2976	24.5628	22.4347	24.8487	-1			4	3	3	274140000	24	13
P05109	P05109	Protein S100-A8;Protein S100-A8, N-terminally processed	S100A8	0.657629	1.03618	10.834	4.1982	22.7345	22.6302	23.1752	24.9072	23.0231	24.5039	-1			3	3	3	211020000	8	12
P05141;Q9H0C2	P05141	ADP/ATP translocase 2;ADP/ATP translocase 2, N-terminally processed	SLC25A5	0.519325	-0.151778	32.852	57.121	29.4986	29.1344	29.4903	29.5629	29.5751	29.4114	-1			15	5	5	9352900000	20	114
P36969	P36969	Phospholipid hydroperoxide glutathione peroxidase, mitochondrial	GPX4	1.81027	-0.520197	22.174	3.4904	24.6252	24.3671	24.8437	24.0678	24.8899	24.3634	-1	+	BicD2_Trbo_RFP-Trbo	2	2	2	288260000	15	13
Q9H6S0	Q9H6S0	Probable ATP-dependent RNA helicase YTHDC2	YTHDC2	1.88953	-0.521466	160.25	60.949	28.0009	27.2863	28.0252	27.6792	27.9066	27.4029	-1	+	BicD2_Trbo_RFP-Trbo	26	26	26	2300900000	89	117
P05198	P05198	Eukaryotic translation initiation factor 2 subunit 1	EIF2S1	1.08776	-0.886636	36.112	45.946	27.9884	26.5992	28.437	27.758	27.8102	27.2185	-1			14	14	14	2454500000	22	109
P05386	P05386	60S acidic ribosomal protein P1	RPLP1	0.462581	-0.348279	11.514	62.811	30.4151	29.4715	29.8351	30.2005	30.592	30.1255	-1			3	2	2	14619000000	4	78
Q9Y6Y8	Q9Y6Y8	SEC23-interacting protein	SEC23IP	1.55057	-0.522622	111.08	47.279	28.0757	27.5001	28.4317	27.8498	28.2588	27.8484	-1	+	BicD2_Trbo_RFP-Trbo	16	16	16	2678000000	44	102
P05388;Q8NHW5	P05388;Q8NHW5	60S acidic ribosomal protein P0;60S acidic ribosomal protein P0-like	RPLP0;RPLP0P6	1.22025	-0.545299	34.273	231.14	31.3583	30.4583	31.5478	31.0546	31.224	30.9813	-1			13	13	13	27350000000	18	276
P05423	P05423	DNA-directed RNA polymerase III subunit RPC4	POLR3D	0.205724	0.244001	44.395	3.9071	22.4318	23.0573	23.4909	23.5381	23.7471	23.8065	-1			3	3	3	117050000	23	3
P05455	P05455	Lupus La protein	SSB	0.181248	-0.210129	46.836	99.519	28.4066	28.1646	29.3738	29.1398	29.2573	29.1029	-1			17	17	17	6527100000	29	203
P05556	P05556	Integrin beta-1	ITGB1	0.78852	-1.76524	88.414	7.5432	25.2463	23.5507	24.5112	24.8047	25.2654	21.3717	-1			5	5	5	296800000	36	15
Q03001	Q03001	Dystonin	DST	1.4032	-0.525546	860.65	43.835	27.6176	27.136	27.3103	27.1488	27.8595	26.926	-1	+	BicD2_Trbo_RFP-Trbo	33	30	30	1945500000	477	85
P06132	P06132	Uroporphyrinogen decarboxylase	UROD	0.00306253	0.00558345	40.786	5.0191	23.8598	23.6302	24.9782	25.3278	24.2966	24.1933	-1			5	5	5	321140000	18	12
P06241;P06239;P09769	P06241	Tyrosine-protein kinase Fyn	FYN	1.08508	-2.07295	60.761	23.867	26.6245	23.2036	27.2003	26.1084	27.1528	25.4466	-1			12	7	7	990160000	32	41
Q9Y265	Q9Y265	RuvB-like 1	RUVBL1	1.43108	-0.527559	50.227	202.15	29.896	29.3121	30.2908	29.7325	30.0859	29.6453	-1	+	BicD2_Trbo_RFP-Trbo	19	19	19	10518000000	22	269
P06454	P06454	Prothymosin alpha;Prothymosin alpha, N-terminally processed;Thymosin alpha-1	PTMA	0.109754	0.112477	12.203	51.784	28.0671	28.0517	28.8888	29.0272	28.4504	28.6649	-1			3	3	3	4527400000	3	61
P06493;Q96Q40;O94921;Q07002;Q00536;Q00537	P06493	Cyclin-dependent kinase 1	CDK1	0.537618	-0.560815	34.095	109.51	28.3782	28.1901	29.695	29.0179	29.1334	28.3162	-1			13	13	11	6053900000	21	164
P06576	P06576	ATP synthase subunit beta, mitochondrial	ATP5B	0.324023	-0.280823	56.559	323.31	31.1158	30.3635	31.5437	31.423	31.2569	31.2875	-1			22	22	22	28593000000	30	561
P06702	P06702	Protein S100-A9	S100A9	0.0339273	0.0867888	13.242	2.9028	22.1667	21.3293	23.4689	23.1892	22.5513	23.9288	-1			3	3	3	82795000	8	4
Q9NPI6	Q9NPI6	mRNA-decapping enzyme 1A	DCP1A	2.64404	-0.539	63.278	23.921	26.8774	26.3887	27.023	26.3986	27.0599	26.5559	-1	+	BicD2_Trbo_RFP-Trbo	11	11	11	1527400000	26	70
P06733	P06733	Alpha-enolase	ENO1	0.190568	-0.204079	47.168	323.31	33.1545	32.7667	34.0015	33.8732	33.6451	33.5489	-1			23	23	19	153310000000	29	953
O00483	O00483	Cytochrome c oxidase subunit NDUFA4	NDUFA4	1.5199	-0.541302	9.3697	8.543	27.1226	26.2724	27.2197	26.7596	26.9918	26.6782	-1	+	BicD2_Trbo_RFP-Trbo	3	3	3	1386900000	6	39
P06744	P06744	Glucose-6-phosphate isomerase	GPI	0.464412	-0.303073	63.146	323.31	30.7903	30.3145	30.5247	30.2542	29.9873	29.8244	-1			23	23	18	18232000000	33	435
P06748	P06748	Nucleophosmin	NPM1	0.932283	-0.554084	32.575	323.31	31.2309	30.4261	31.681	31.2652	31.3558	30.9142	-1			10	10	10	29942000000	16	310
P06753	P06753	Tropomyosin alpha-3 chain	TPM3	0.887094	-0.635135	32.95	33.785	28.1197	27.6413	29.0096	28.2583	28.8405	28.1648	-1			9	5	4	5807100000	24	80
Q16778;P33778;P23527;P06899;Q8N257;Q6DRA6;Q6DN03	Q16778;P33778;P23527;P06899;Q8N257	Histone H2B type 2-E;Histone H2B type 1-B;Histone H2B type 1-O;Histone H2B type 1-J;Histone H2B type 3-B	HIST2H2BE;HIST1H2BB;HIST1H2BO;HIST1H2BJ;HIST3H2BB	0.034954	0.0799745	13.92	79.217	29.0524	30.9579	29.7375	28.5947	30.3168	29.7939	-1			6	6	1	13949000000	11	161
P07099	P07099	Epoxide hydrolase 1	EPHX1	0.0553868	-0.137196	52.948	10.433	23.4961	24.4147	26.3054	24.9345	25.2247	25.2654	-1			8	8	8	579950000	24	22
P07108	P07108	Acyl-CoA-binding protein	DBI	0.166141	0.290146	10.044	7.5018	25.5883	25.3096	26.7596	26.3664	25.6012	27.1435	-1			3	3	3	978330000	5	35
P07195;Q6ZMR3;P07864	P07195	L-lactate dehydrogenase B chain	LDHB	0.115988	-0.129162	36.638	323.31	31.5933	31.3331	32.5053	32.3878	31.9717	31.9619	-1			16	16	15	53244000000	21	504
P07237	P07237	Protein disulfide-isomerase	P4HB	0.5666	-0.492174	57.116	188.84	29.0377	28.1961	29.729	29.2699	29.1948	29.019	-1			18	18	18	6895700000	39	193
P07339	P07339	Cathepsin D;Cathepsin D light chain;Cathepsin D heavy chain	CTSD	0.382935	-0.87564	44.552	1.8492	24.2031	21.6192	21.7205	20.9226	22.155	22.9099	-1			2	2	2	62108000	21	2
P47756	P47756	F-actin-capping protein subunit beta	CAPZB	1.90862	-0.550315	31.35	323.31	30.892	30.2815	31.0522	30.5188	30.7375	30.2304	-1	+	BicD2_Trbo_RFP-Trbo	11	11	11	19282000000	20	327
P07384	P07384	Calpain-1 catalytic subunit	CAPN1	0.530737	-0.513341	81.889	1.9968	22.6561	21.7585	23.4112	22.9658	22.7935	22.5965	-1			1	1	1	94516000	39	6
P07437;A6NNZ2;CON__ENSEMBL:ENSBTAP00000025008;Q9H4B7	P07437	Tubulin beta chain	TUBB	0.688054	-0.458292	49.67	200.81	31.8233	31.2352	32.5131	31.9499	32.1042	31.8806	-1			22	5	4	52581000000	21	287
P07602	P07602	Prosaposin;Saposin-A;Saposin-B-Val;Saposin-B;Saposin-C;Saposin-D	PSAP	1.06029	-2.79808	58.112	3.6922	25.4258	21.4011	25.8734	23.8278	23.1702	20.8463	-1			3	3	3	206000000	33	10
P07686	P07686	Beta-hexosaminidase subunit beta;Beta-hexosaminidase subunit beta chain B;Beta-hexosaminidase subunit beta chain A	HEXB	0.707647	-1.14021	63.111	11.727	25.5777	23.2448	25.6115	25.7433	25.9535	24.734	-1			5	5	5	520920000	30	22
P07737;CON__P02584	P07737	Profilin-1	PFN1	0.292044	-0.301073	15.054	136.65	30.6956	30.207	31.6008	31.2465	31.1631	31.1027	-1			8	8	8	27653000000	9	233
P07741	P07741	Adenine phosphoribosyltransferase	APRT	0.00326152	-0.00636228	19.608	101.63	27.5042	26.5272	28.1423	28.5108	27.4262	28.0156	-1			7	7	7	2699200000	14	101
P07814	P07814	Bifunctional glutamate/proline--tRNA ligase;Glutamate--tRNA ligase;Proline--tRNA ligase	EPRS	0.497162	-0.439423	170.59	252.74	29.4685	28.7156	30.2021	29.7552	29.5252	29.4067	-1			47	47	47	9428500000	91	342
P07858	P07858	Cathepsin B;Cathepsin B light chain;Cathepsin B heavy chain	CTSB	0.253791	-0.239557	37.821	5.3883	24.3143	24.8056	24.7327	23.8659	25.08	24.7368	-1			3	3	3	384100000	16	22
P07900;Q14568;Q58FG0;Q92538	P07900	Heat shock protein HSP 90-alpha	HSP90AA1	0.0578014	0.0716057	84.659	323.31	31.9746	31.8258	32.888	32.9359	32.381	32.6967	-1			35	21	21	70242000000	39	589
P07910;P0DMR1;O60812;B7ZW38;B2RXH8	P07910;P0DMR1;O60812;B7ZW38;B2RXH8	Heterogeneous nuclear ribonucleoproteins C1/C2;Heterogeneous nuclear ribonucleoprotein C-like 4;Heterogeneous nuclear ribonucleoprotein C-like 1;Heterogeneous nuclear ribonucleoprotein C-like 3;Heterogeneous nuclear ribonucleoprotein C-like 2	HNRNPC;HNRNPCL4;HNRNPCL1;HNRNPCL3;HNRNPCL2	0.447214	-0.281407	33.67	59.293	28.8473	28.9465	29.522	29.2977	29.4442	28.725	-1			10	10	10	6621600000	22	150
P07919	P07919	Cytochrome b-c1 complex subunit 6, mitochondrial	UQCRH	0.315418	-0.280296	10.739	28.613	25.5871	24.5952	25.2051	25.409	25.738	25.685	-1			1	1	1	548850000	7	24
Q9H425	Q9H425	Uncharacterized protein C1orf198	C1orf198	1.33072	-0.562719	36.346	35.798	27.2514	26.9799	27.5909	26.971	27.9163	27.1195	-1	+	BicD2_Trbo_RFP-Trbo	10	10	10	1699400000	24	66
P47755	P47755	F-actin-capping protein subunit alpha-2	CAPZA2	3.35368	-0.565604	32.949	323.31	30.7992	30.0833	30.6847	30.2001	30.6913	30.195	-1	+	BicD2_Trbo_RFP-Trbo	14	14	12	17088000000	15	298
P07954	P07954	Fumarate hydratase, mitochondrial	FH	0.283313	0.79856	54.636	9.6661	22.4508	23.3911	25.3719	24.0227	21.9669	24.7715	-1			4	4	4	306670000	32	11
P53621	P53621	Coatomer subunit alpha;Xenin;Proxenin	COPA	1.80869	-0.57309	138.34	179.97	29.847	28.9839	29.8081	29.4235	29.8586	29.387	-1	+	BicD2_Trbo_RFP-Trbo	43	43	43	10062000000	76	384
P08134;P61586;P62745	P08134;P61586	Rho-related GTP-binding protein RhoC;Transforming protein RhoA	RHOC;RHOA	0.369334	-0.434403	22.006	74.035	27.4651	26.4822	28.1038	28.0411	27.741	27.4834	-1			6	6	6	2738700000	11	81
P08195	P08195	4F2 cell-surface antigen heavy chain	SLC3A2	0.429424	0.479266	67.993	4.6005	23.6372	23.8665	22.3496	23.0256	23.3225	23.855	-1			4	4	4	85000000	33	3
P08237	P08237	ATP-dependent 6-phosphofructokinase, muscle type	PFKM	0.387419	-0.44567	85.182	16.376	25.8506	25.2301	26.4292	26.6479	26.7137	25.7785	-1			12	9	9	891080000	41	46
P08238;Q58FF7	P08238	Heat shock protein HSP 90-beta	HSP90AB1	0.162812	-0.171262	83.263	323.31	33.3825	32.8755	34.0882	34.0086	33.5043	33.5771	-1			36	36	19	158180000000	40	994
Q96D71;Q8NFH8	Q96D71	RalBP1-associated Eps domain-containing protein 1	REPS1	1.8059	-0.582446	86.661	64.062	28.3807	27.4257	28.1853	27.6455	28.0417	27.789	-1	+	BicD2_Trbo_RFP-Trbo	13	13	13	2473700000	43	102
P08243	P08243	Asparagine synthetase [glutamine-hydrolyzing]	ASNS	0.0116395	-0.0137253	64.369	66.535	28.3502	27.7427	28.7051	28.965	28.1596	28.466	-1			18	18	18	4271900000	36	173
P08559;P29803	P08559	Pyruvate dehydrogenase E1 component subunit alpha, somatic form, mitochondrial	PDHA1	0.155703	-0.300203	43.295	16.96	26.6007	25.0835	27.1943	26.6183	26.0494	27.242	-1			8	8	8	1098900000	25	38
P08574	P08574	Cytochrome c1, heme protein, mitochondrial	CYC1	0.775025	-0.572789	35.422	43.111	25.7956	25.1079	26.4833	25.309	25.4005	25.5442	-1			4	4	4	730810000	17	33
P08579	P08579	U2 small nuclear ribonucleoprotein B	SNRPB2	0.957002	-0.650429	25.486	3.1106	24.6585	23.7211	24.7487	24.6513	24.6062	23.6897	-1			2	1	1	260830000	11	5
P08621	P08621	U1 small nuclear ribonucleoprotein 70 kDa	SNRNP70	1.02176	-0.726661	51.556	12.979	26.5795	26.3904	27.6391	26.3099	26.7853	26.1236	-1			8	8	8	1228800000	19	37
Q9UMZ2	Q9UMZ2	Synergin gamma	SYNRG	2.26186	-0.583194	140.65	323.31	30.7569	29.9716	30.7981	30.2703	30.7392	30.3027	-1	+	BicD2_Trbo_RFP-Trbo	38	38	38	16419000000	61	563
P42566	P42566	Epidermal growth factor receptor substrate 15	EPS15	3.12996	-0.586292	98.655	131.12	29.4514	28.7667	29.392	28.8972	29.3159	28.7366	-1	+	BicD2_Trbo_RFP-Trbo	28	28	28	5272900000	48	232
P21333	P21333	Filamin-A	FLNA	3.70343	-0.588211	280.74	323.31	34.0109	33.3648	34.0091	33.3708	33.9794	33.4992	-1	+	BicD2_Trbo_RFP-Trbo	102	102	93	160080000000	144	2273
P08758	P08758	Annexin A5	ANXA5	0.39106	-0.507689	35.936	83.098	28.0045	27.187	29.1444	28.6501	28.2509	28.0396	-1			15	15	15	4263800000	26	142
P08865	P08865	40S ribosomal protein SA	RPSA	0.473853	-0.459045	32.854	189.03	30.2367	29.3974	30.9211	30.61	30.5958	30.3691	-1			14	14	14	17760000000	15	277
P09012	P09012	U1 small nuclear ribonucleoprotein A	SNRPA	0.403388	-0.314593	31.279	34.853	26.6178	25.9354	27.1078	26.6802	26.2506	26.4168	-1			4	4	3	1042700000	12	36
P09104	P09104	Gamma-enolase	ENO2	0.0582297	-0.178806	47.268	19.864	23.527	23.0423	25.9759	25.5614	24.8802	25.243	-1			13	9	9	532650000	27	23
P09132	P09132	Signal recognition particle 19 kDa protein	SRP19	1.16147	-2.79055	16.156	8.2587	24.49	24.5201	26.4287	21.2706	25.2899	22.0464	-1			3	3	3	272550000	8	12
P09211	P09211	Glutathione S-transferase P	GSTP1	0.721943	-0.79898	23.356	4.4369	23.2866	21.838	22.9	22.6389	22.0876	21.4003	-1			3	3	3	127340000	11	3
P09234	P09234	U1 small nuclear ribonucleoprotein C	SNRPC	0.712217	2.16185	17.394	5.0774	24.8412	24.4257	22.9755	24.9611	20.1184	25.0338	-1			2	2	2	337250000	4	10
P09429;B2RPK0	P09429;B2RPK0	High mobility group protein B1;Putative high mobility group protein B1-like 1	HMGB1;HMGB1P1	0.484552	-0.388835	24.893	72.255	28.5992	27.8442	29.1814	28.7854	28.7128	28.6973	-1			7	7	6	5218000000	11	143
P09471	P09471	Guanine nucleotide-binding protein G(o) subunit alpha	GNAO1	0.528777	-1.14486	40.05	6.4637	24.4806	24.3249	24.6948	21.3735	23.8058	23.848	-1			4	2	2	220240000	18	9
P09493	P09493	Tropomyosin alpha-1 chain	TPM1	1.19612	-2.0209	32.708	13.726	27.5768	26.2066	27.6781	26.687	27.8113	24.1098	-1			8	3	3	2801500000	23	44
P09496	P09496	Clathrin light chain A	CLTA	0.269049	0.990543	27.076	2.7703	25.1008	24.5345	21.0224	25.0613	25.6549	25.154	-1			2	2	2	392680000	10	14
Q9UHV9	Q9UHV9	Prefoldin subunit 2	PFDN2	1.41666	-0.588607	16.648	78.142	27.6504	26.6816	27.5707	27.2447	27.7208	27.2498	-1	+	BicD2_Trbo_RFP-Trbo	5	5	5	1988100000	12	70
P09543	P09543	2,3-cyclic-nucleotide 3-phosphodiesterase	CNP	0.433908	-0.575184	47.578	29.863	24.9001	24.9542	26.568	25.4534	26.357	25.6919	-1			7	7	7	764610000	32	32
P09622	P09622	Dihydrolipoyl dehydrogenase, mitochondrial	DLD	0.140082	-0.117353	54.177	113.61	27.2636	26.554	27.3889	27.4102	27.1761	27.5122	-1			11	11	11	1939400000	27	91
P09651;Q32P51	P09651;Q32P51	Heterogeneous nuclear ribonucleoprotein A1;Heterogeneous nuclear ribonucleoprotein A1, N-terminally processed;Heterogeneous nuclear ribonucleoprotein A1-like 2	HNRNPA1;HNRNPA1L2	0.872276	-0.451141	38.746	136.33	30.519	29.9948	31.0534	30.629	30.7106	30.3057	-1			9	8	8	17828000000	19	224
P61978	P61978	Heterogeneous nuclear ribonucleoprotein K	HNRNPK	1.36118	-0.589147	50.976	242.26	30.953	30.3166	31.4166	30.8098	31.2352	30.7109	-1	+	BicD2_Trbo_RFP-Trbo	15	15	15	23519000000	27	340
P09669	P09669	Cytochrome c oxidase subunit 6C	COX6C	0.539613	-0.938883	8.7813	1.9515	24.5467	22.3785	24.4062	23.3489	22.3377	22.7465	-1			2	2	2	167660000	6	6
P09874	P09874	Poly [ADP-ribose] polymerase 1	PARP1	0.837779	-0.364932	113.08	260.78	30.6373	30.1204	31.016	30.6933	30.7584	30.5031	-1			39	39	39	20965000000	60	513
P09884	P09884	DNA polymerase alpha catalytic subunit	POLA1	0.640651	-0.619725	165.91	3.6642	23.1097	23.1258	22.9599	22.8537	24.1767	22.4076	-1			2	2	2	87758000	87	7
P09936	P09936	Ubiquitin carboxyl-terminal hydrolase isozyme L1	UCHL1	0.19089	-0.219027	24.824	258.88	30.108	29.4349	30.7664	30.7376	30.4148	30.4595	-1			8	8	8	16593000000	13	190
P09960	P09960	Leukotriene A-4 hydrolase	LTA4H	0.0750262	-0.109158	69.284	105.63	28.105	27.6783	29.2258	28.8297	28.1667	28.6621	-1			19	19	19	4817700000	38	174
P09972	P09972	Fructose-bisphosphate aldolase C	ALDOC	0.431299	-0.462482	39.455	89.865	27.2098	26.7909	28.4117	27.434	27.1032	27.1124	-1			3	1	1	2041200000	23	27
Q71UI9;P0C0S5	Q71UI9;P0C0S5	Histone H2A.V;Histone H2A.Z	H2AFV;H2AFZ	0.199118	0.322905	13.509	6.3342	24.708	26.216	25.2523	24.1497	24.7067	25.27	-1			4	2	2	503700000	6	21
P0CAP2	P0CAP2	DNA-directed RNA polymerase II subunit GRINL1A	POLR2M	0.230075	-0.778669	41.739	4.637	21.8956	19.8371	23.543	23.019	23.5358	23.7823	-1			4	4	4	47310000	24	4
P0DMV9;P0DMV8	P0DMV9;P0DMV8	Heat shock 70 kDa protein 1B;Heat shock 70 kDa protein 1A	HSPA1B;HSPA1A	0.954094	-0.489892	70.051	323.31	34.2323	33.561	34.7102	34.193	34.318	34.0367	-1			32	29	14	230310000000	36	1159
P43307	P43307	Translocon-associated protein subunit alpha	SSR1	1.3888	-0.591594	32.235	5.0104	25.9065	25.176	26.246	25.3652	25.6213	25.4578	-1	+	BicD2_Trbo_RFP-Trbo	2	2	2	688810000	10	33
O43795;Q8N1T3	O43795	Unconventional myosin-Ib	MYO1B	3.28684	-0.593534	131.98	323.31	31.4024	30.74	31.4784	30.8986	31.4422	30.9038	-1	+	BicD2_Trbo_RFP-Trbo	48	48	45	39869000000	70	858
P10114;Q9Y3L5;P61225	P10114;Q9Y3L5;P61225	Ras-related protein Rap-2a;Ras-related protein Rap-2c;Ras-related protein Rap-2b	RAP2A;RAP2C;RAP2B	0.799545	-0.689043	20.615	2.1036	24.4889	23.964	25.0315	24.1406	23.9633	23.3119	-1			2	2	2	260990000	12	7
P10155	P10155	60 kDa SS-A/Ro ribonucleoprotein	TROVE2	0.198368	-0.24088	60.67	11.42	24.8187	25.0357	26.138	25.4618	26.0062	25.7428	-1			7	7	7	587010000	34	26
P10321	P10321	HLA class I histocompatibility antigen, Cw-7 alpha chain	HLA-C	0.0837611	0.133422	40.648	24.458	25.6416	24.5822	25.3134	25.1349	24.3	25.9382	-1			4	4	2	468410000	19	21
P23396	P23396	40S ribosomal protein S3	RPS3	1.93765	-0.59479	26.688	175.59	32.5697	31.7153	32.6062	32.139	32.552	32.0892	-1	+	BicD2_Trbo_RFP-Trbo	18	18	18	56696000000	19	408
P10515	P10515	Dihydrolipoyllysine-residue acetyltransferase component of pyruvate dehydrogenase complex, mitochondrial	DLAT	0.270024	-0.464907	68.996	14.754	25.0387	23.7026	25.8942	25.755	25.3992	25.4798	-1			7	7	7	628020000	32	41
Q9UL18;Q9HCK5	Q9UL18	Protein argonaute-1	AGO1	3.4556	-0.597375	97.213	49.088	27.8854	27.2377	27.916	27.4055	27.8978	27.2637	-1	+	BicD2_Trbo_RFP-Trbo	26	18	15	2637900000	53	88
Q13015	Q13015	Protein AF1q	MLLT11	1.39224	-0.598722	10.061	4.1148	24.2586	23.3909	24.0329	23.9349	24.4634	23.633	-1	+	BicD2_Trbo_RFP-Trbo	1	1	1	199850000	6	14
P10620	P10620	Microsomal glutathione S-transferase 1	MGST1	0.133255	0.331446	17.598	2.1186	22.2578	22.4628	24.3429	24.6958	23.7406	24.177	-1			1	1	1	114820000	6	6
P17812	P17812	CTP synthase 1	CTPS1	1.35432	-0.608997	66.69	56.237	28.7963	27.9107	29.0097	28.5722	28.9309	28.4271	-1	+	BicD2_Trbo_RFP-Trbo	20	20	18	4759400000	31	190
P10644;P31321	P10644	cAMP-dependent protein kinase type I-alpha regulatory subunit;cAMP-dependent protein kinase type I-alpha regulatory subunit, N-terminally processed	PRKAR1A	0.604812	-0.50139	42.981	25.004	26.4698	25.1075	25.8786	25.8887	25.4736	25.3217	-1			9	9	9	760890000	20	31
P10768	P10768	S-formylglutathione hydrolase	ESD	0.847599	-1.01694	31.462	79.083	28.1499	26.4778	28.765	28.3033	28.3794	27.4623	-1			13	13	13	3690300000	16	172
P10809	P10809	60 kDa heat shock protein, mitochondrial	HSPD1	0.283357	-0.291092	61.054	323.31	31.6299	31.1319	32.5244	32.2133	31.9688	31.9045	-1			28	28	28	49751000000	36	711
P11021	P11021	78 kDa glucose-regulated protein	HSPA5	0.780882	-0.339553	72.332	323.31	30.8978	30.4695	31.3656	30.9111	31.0274	30.8916	-1			29	28	28	23839000000	39	546
P11142;P54652	P11142	Heat shock cognate 71 kDa protein	HSPA8	1.1088	-0.424737	70.897	323.31	33.5905	33.0204	33.9302	33.4822	33.5518	33.2957	-1			34	34	28	143170000000	37	1069
P63261	P63261	Actin, cytoplasmic 2;Actin, cytoplasmic 2, N-terminally processed	ACTG1	1.45362	-0.612025	41.792	323.31	34.6593	33.9271	35.029	34.4166	34.9045	34.4132	-1	+	BicD2_Trbo_RFP-Trbo	17	17	1	387980000000	23	1094
P11172	P11172	Uridine 5-monophosphate synthase;Orotate phosphoribosyltransferase;Orotidine 5-phosphate decarboxylase	UMPS	0.0469615	0.0686563	52.221	6.3747	23.3017	23.4444	23.9493	24.1993	24.6652	24.4785	-1			4	4	4	233670000	27	20
P11177	P11177	Pyruvate dehydrogenase E1 component subunit beta, mitochondrial	PDHB	0.316257	-0.29586	39.233	19.162	26.3654	25.9539	27.3208	26.6782	26.5127	26.6794	-1			10	10	10	1172800000	18	55
P11216;P11217	P11216;P11217	Glycogen phosphorylase, brain form;Glycogen phosphorylase, muscle form	PYGB;PYGM	0.0540622	-0.0588881	96.695	10.211	25.6482	24.939	25.6378	26.2231	25.7644	25.7116	-1			8	8	5	561550000	55	28
P11233;P11234	P11233	Ras-related protein Ral-A	RALA	0.401791	-0.495697	23.567	12.778	25.2757	23.9099	24.1739	23.631	24.5571	24.9787	-1			3	3	3	296210000	11	8
P11274	P11274	Breakpoint cluster region protein	BCR	0.188638	-0.325129	142.82	2.4419	21.9236	23.0169	23.1554	21.5684	23.4221	22.9404	-1			4	3	3	105470000	60	4
P11279	P11279	Lysosome-associated membrane glycoprotein 1	LAMP1	0.97066	-1.47176	44.882	6.3154	22.7609	22.9067	24.8918	22.7521	24.7654	22.344	-1			3	3	3	215820000	20	15
P11310	P11310	Medium-chain specific acyl-CoA dehydrogenase, mitochondrial	ACADM	0.153761	-0.174245	46.588	15.051	25.1498	25.1414	26.3148	25.9878	25.9135	25.726	-1			7	7	7	737120000	21	40
P11387	P11387	DNA topoisomerase 1	TOP1	0.352334	-0.356153	90.725	11.489	25.0863	24.627	25.9571	25.7879	25.606	25.166	-1			6	6	6	507590000	47	19
P11413	P11413	Glucose-6-phosphate 1-dehydrogenase	G6PD	1.09987	-0.8137	59.256	13.04	26.6085	25.1568	26.6465	26.3344	26.6414	25.9642	-1			11	11	11	986430000	38	36
P62269	P62269	40S ribosomal protein S18	RPS18	2.3083	-0.617794	17.718	79.721	30.9577	30.3689	31.2498	30.4086	30.9793	30.5559	-1	+	BicD2_Trbo_RFP-Trbo	12	12	12	21411000000	12	207
P11586	P11586	C-1-tetrahydrofolate synthase, cytoplasmic;Methylenetetrahydrofolate dehydrogenase;Methenyltetrahydrofolate cyclohydrolase;Formyltetrahydrofolate synthetase;C-1-tetrahydrofolate synthase, cytoplasmic, N-terminally processed	MTHFD1	0.582214	-0.422212	101.53	212.84	30.2516	29.2661	30.2281	30.3165	29.9657	29.5962	-1			34	34	34	12120000000	56	368
P11766	P11766	Alcohol dehydrogenase class-3	ADH5	0.309597	-0.52083	39.724	54.97	26.302	25.4175	27.7003	27.2147	27.0942	26.9017	-1			7	7	7	1642900000	19	64
P11802	P11802	Cyclin-dependent kinase 4	CDK4	0.719472	-0.38596	33.729	13.846	26.6488	26.2095	27.208	26.7514	27.0221	26.7601	-1			7	6	6	1494600000	20	51
P11908	P11908	Ribose-phosphate pyrophosphokinase 2	PRPS2	0.939293	-0.68962	34.769	9.3792	25.7196	24.2768	25.7016	24.9873	25.0995	25.1877	-1			8	3	3	418260000	19	27
Q9UFG5	Q9UFG5	UPF0449 protein C19orf25	C19orf25	1.31871	-0.623176	12.878	9.3726	24.2796	23.9026	24.3731	23.439	24.6439	24.0855	-1	+	BicD2_Trbo_RFP-Trbo	1	1	1	177460000	9	15
P12004	P12004	Proliferating cell nuclear antigen	PCNA	0.241848	-0.226652	28.768	206.43	29.9338	29.3165	30.5618	30.3083	29.951	30.1419	-1			12	12	12	13254000000	18	306
P12074	P12074	Cytochrome c oxidase subunit 6A1, mitochondrial	COX6A1	0.32836	-0.831041	12.155	1.9178	23.5669	21.3597	23.8496	23.1495	24.4403	24.8545	-1			1	1	1	179540000	5	6
P12081;P49590	P12081	Histidine--tRNA ligase, cytoplasmic	HARS	0.0176888	-0.022646	57.41	33.773	26.6359	26.2878	27.4603	27.4334	26.7249	27.032	-1			13	13	13	1775800000	34	82
P12235	P12235	ADP/ATP translocase 1	SLC25A4	0.40369	-0.219694	33.064	49.868	26.8656	26.2883	27.044	26.7543	26.4264	26.6344	-1			16	6	5	1353200000	21	57
P35580;P13533;REV__Q8IYT3;Q9UKX3;Q9UKX2;A7E2Y1	P35580	Myosin-10	MYH10	3.64474	-0.62669	229	323.31	36.2923	35.5957	36.3369	35.7472	36.2562	35.6625	-1	+	BicD2_Trbo_RFP-Trbo	136	136	108	1056300000000	125	4860
P12268	P12268	Inosine-5-monophosphate dehydrogenase 2	IMPDH2	1.08749	-0.502608	55.804	135.46	28.4607	27.8741	28.984	28.33	28.5192	28.2519	-1			14	14	14	4622400000	25	179
P12270	P12270	Nucleoprotein TPR	TPR	0.603528	1.05082	267.29	17.706	23.273	25.0884	25.7789	25.9666	24.7487	25.898	-1			12	12	12	538770000	140	20
P12273	P12273	Prolactin-inducible protein	PIP	0.0450092	-0.102441	16.572	1.8724	23.9849	23.3809	21.5781	22.8712	23.4958	22.4995	-1			2	2	2	86213000	12	3
P12277;P06732	P12277	Creatine kinase B-type	CKB	0.0693431	0.0826556	42.644	323.31	32.5088	32.2739	33.3089	33.4218	32.7177	33.0876	-1			20	20	20	93585000000	21	743
P12532;P17540	P12532	Creatine kinase U-type, mitochondrial	CKMT1A	0.167736	0.502993	47.036	38.626	24.3434	26.3474	27.7677	27.5106	27.3507	27.1128	-1			5	5	5	2016800000	26	59
P12814;P35609;Q08043	P12814	Alpha-actinin-1	ACTN1	0.53757	-1.39557	103.06	15.461	25.2022	21.4089	24.9441	24.7745	25.1212	24.8973	-1			21	8	8	412610000	60	15
P12955	P12955	Xaa-Pro dipeptidase	PEPD	0.346955	-1.2901	54.548	9.0667	26.2754	25.1744	26.3484	21.8335	22.8832	24.6288	-1			5	5	5	396280000	25	18
P12956	P12956	X-ray repair cross-complementing protein 6	XRCC6	1.08752	-0.727196	69.842	184.58	29.7462	28.7422	30.2752	29.6505	29.9955	29.4426	-1			26	26	26	10899000000	40	359
Q96KP1	Q96KP1	Exocyst complex component 2	EXOC2	1.52006	-0.628201	104.07	6.4676	25.2733	24.4815	24.9911	24.6718	24.9115	24.1381	-1	+	BicD2_Trbo_RFP-Trbo	5	5	5	331030000	51	10
P13073	P13073	Cytochrome c oxidase subunit 4 isoform 1, mitochondrial	COX4I1	0.522634	-0.501087	19.576	13.815	26.5139	26.3469	27.7949	27.0069	27.3282	26.7799	-1			5	5	5	1664300000	12	97
P13489	P13489	Ribonuclease inhibitor	RNH1	0.30039	-0.45067	49.973	47.647	26.6284	26.2899	28.0223	26.8342	27.639	27.8135	-1			14	14	14	1863100000	29	101
P13639	P13639	Elongation factor 2	EEF2	0.742067	-0.577079	95.337	323.31	32.8478	31.9396	33.4964	32.8881	32.838	32.6233	-1			41	41	40	90343000000	52	1052
P13667	P13667	Protein disulfide-isomerase A4	PDIA4	0.258901	-0.340366	72.932	87.865	27.9829	27.5735	29.2626	28.8376	28.43	28.2433	-1			21	21	20	4489300000	46	173
P13674	P13674	Prolyl 4-hydroxylase subunit alpha-1	P4HA1	0.14814	-0.406155	61.049	3.7836	23.4854	21.524	23.1941	21.9945	20.3661	22.3087	-1			3	3	3	112410000	32	5
P13693;Q56UQ5	P13693	Translationally-controlled tumor protein	TPT1	1.13523	-1.2465	19.595	91.614	28.2423	26.6694	29.3582	27.9055	28.4204	27.7066	-1			6	6	6	3960900000	8	86
Q15366	Q15366	Poly(rC)-binding protein 2	PCBP2	1.7755	-0.629046	38.58	225.81	30.505	29.6394	30.5471	30.1688	30.447	29.8038	-1	+	BicD2_Trbo_RFP-Trbo	16	11	10	13958000000	18	193
P13797;Q14651	P13797	Plastin-3	PLS3	0.890303	-0.828101	70.81	198.81	29.06	27.7428	29.7342	28.9418	29.2006	28.8259	-1			23	23	16	6657200000	40	251
P13798	P13798	Acylamino-acid-releasing enzyme	APEH	0.0923753	-0.173043	81.224	12.134	25.909	24.239	25.4616	26.4728	25.367	25.5067	-1			9	9	9	739320000	33	16
P13804	P13804	Electron transfer flavoprotein subunit alpha, mitochondrial	ETFA	0.323611	-0.43154	35.079	16.637	26.8351	25.6134	27.4037	26.9607	26.9489	27.319	-1			8	8	8	1440100000	23	63
P13807	P13807	Glycogen [starch] synthase, muscle	GYS1	0.28906	0.341158	83.785	13.021	24.7943	24.5221	23.6729	25.0539	25.1398	25.0546	-1			5	5	5	368110000	38	17
P13861	P13861	cAMP-dependent protein kinase type II-alpha regulatory subunit	PRKAR2A	0.878309	-1.47383	45.518	6.0719	23.9028	22.4615	25.4241	24.5237	24.8376	22.7577	-1			3	3	3	264510000	26	8
P13984	P13984	General transcription factor IIF subunit 2	GTF2F2	0.83761	-1.46589	28.38	11.672	24.7627	23.9507	25.3822	21.939	24.646	24.5034	-1			2	2	2	231110000	17	6
Q96KA5	Q96KA5	Cleft lip and palate transmembrane protein 1-like protein	CLPTM1L	1.54232	-0.631811	62.228	7.2832	23.3358	22.6924	23.0742	22.766	23.1596	22.2158	-1	+	BicD2_Trbo_RFP-Trbo	4	4	4	65322000	24	6
P13995	P13995	Bifunctional methylenetetrahydrofolate dehydrogenase/cyclohydrolase, mitochondrial;NAD-dependent methylenetetrahydrofolate dehydrogenase;Methenyltetrahydrofolate cyclohydrolase	MTHFD2	0.538461	-0.657482	37.895	12.18	24.7812	23.7494	25.587	24.8594	24.1507	23.9378	-1			3	3	3	429040000	22	24
Q9Y678	Q9Y678	Coatomer subunit gamma-1	COPG1	1.313	-0.632306	97.717	28.013	27.1822	26.5803	27.8108	27.0119	27.4156	26.9196	-1	+	BicD2_Trbo_RFP-Trbo	13	13	11	1830600000	51	82
P14314	P14314	Glucosidase 2 subunit beta	PRKCSH	0.626061	-0.638675	59.425	61.049	27.8229	26.8247	28.6809	28.1164	28.067	27.7137	-1			13	13	13	3428600000	19	127
P14324	P14324	Farnesyl pyrophosphate synthase	FDPS	0.16003	-0.180069	48.275	10.196	26.7017	25.6659	26.8582	26.8073	26.146	26.6925	-1			4	4	4	1155100000	21	51
P14373	P14373	Zinc finger protein RFP	TRIM27	0.665919	0.326546	58.489	33.537	26.7025	26.7709	26.4469	26.631	25.9576	26.6847	-1			8	8	8	1083500000	26	61
P14406	P14406	Cytochrome c oxidase subunit 7A2, mitochondrial	COX7A2	0.676075	-0.676399	9.3959	7.5428	25.7869	24.3992	26.1941	25.813	25.8203	25.5598	-1			2	2	2	620770000	5	26
P14550	P14550	Alcohol dehydrogenase [NADP(+)]	AKR1A1	0.770514	-0.633631	36.573	19.864	26.2344	25.4181	27.0712	25.9421	26.2898	26.3343	-1			9	9	9	1151700000	23	43
P14618;P30613	P14618	Pyruvate kinase PKM	PKM	0.181311	-0.205706	57.936	323.31	32.5005	31.9997	33.33	33.2129	32.833	32.8338	-1			31	31	31	95583000000	36	926
P14625;Q58FF3	P14625	Endoplasmin	HSP90B1	0.356568	-0.385773	92.468	323.31	30.6557	29.9269	31.4853	31.2187	30.9292	30.7673	-1			36	35	35	25296000000	49	573
Q15042	Q15042	Rab3 GTPase-activating protein catalytic subunit	RAB3GAP1	1.77833	-0.633661	110.52	12.903	26.3468	25.6278	26.1507	25.644	26.5956	25.9204	-1	+	BicD2_Trbo_RFP-Trbo	9	9	9	707360000	55	23
P07947;P12931	P07947	Tyrosine-protein kinase Yes	YES1	1.71319	-0.637805	60.801	58.966	28.0878	27.6976	28.5339	27.7556	28.6043	27.8595	-1	+	BicD2_Trbo_RFP-Trbo	13	11	7	3344100000	28	102
P63162;P14678	P63162;P14678	Small nuclear ribonucleoprotein-associated protein N;Small nuclear ribonucleoprotein-associated proteins B and B	SNRPN;SNRPB	1.18783	-0.548765	24.614	15.913	28.0238	27.5056	28.5287	28.0134	28.1914	27.5785	-1			7	7	7	2920900000	15	85
P62316	P62316	Small nuclear ribonucleoprotein Sm D2	SNRPD2	2.10586	-0.645751	13.527	67.256	28.1396	27.4773	28.4223	27.5104	28.11	27.7469	-1	+	BicD2_Trbo_RFP-Trbo	6	6	6	2319700000	9	68
P14854	P14854	Cytochrome c oxidase subunit 6B1	COX6B1	0.315973	-0.439339	10.192	21.201	26.279	25.2679	27.1154	26.96	26.7535	26.6019	-1			4	4	4	1247400000	7	35
Q9NZI8	Q9NZI8	Insulin-like growth factor 2 mRNA-binding protein 1	IGF2BP1	1.39368	-0.648525	63.48	111.12	28.7422	27.9897	29.1863	28.1736	28.5689	28.3886	-1	+	BicD2_Trbo_RFP-Trbo	12	12	11	4296900000	35	171
P14868	P14868	Aspartate--tRNA ligase, cytoplasmic	DARS	0.245977	-0.172764	57.136	116.65	28.7741	28.4073	29.3347	29.0811	28.72	28.8222	-1			24	24	24	6047300000	39	251
Q659C4	Q659C4	La-related protein 1B	LARP1B	2.67428	-0.649737	105.32	7.007	24.7679	24.262	25.0447	24.156	24.8387	24.2842	-1	+	BicD2_Trbo_RFP-Trbo	9	5	5	205390000	50	11
P14927	P14927	Cytochrome b-c1 complex subunit 7	UQCRB	0.784975	-2.13257	13.53	3.4542	23.7019	20.9035	25.3928	24.7527	24.9303	21.971	-1			2	2	2	237830000	8	8
P15104	P15104	Glutamine synthetase	GLUL	0.780288	-2.36809	42.064	12.287	25.906	20.4475	25.6717	24.713	25.1437	24.4565	-1			4	4	4	321230000	17	16
P15121;C9JRZ8	P15121	Aldose reductase	AKR1B1	0.017147	-0.0323607	35.853	48.35	27.6272	27.115	28.9085	28.6019	27.6573	28.3791	-1			12	12	12	3670200000	20	111
P15170	P15170	Eukaryotic peptide chain release factor GTP-binding subunit ERF3A	GSPT1	0.446298	-0.0668691	55.755	323.31	32.3552	32.3034	32.5096	32.4573	32.4734	32.3769	-1			23	23	11	56594000000	29	634
P15311	P15311	Ezrin	EZR	0.246696	-0.124486	69.412	75.547	28.2997	28.031	28.6525	28.6182	28.3946	28.3241	-1			20	20	13	4553600000	39	163
P15374	P15374	Ubiquitin carboxyl-terminal hydrolase isozyme L3	UCHL3	0.717864	-1.76487	26.182	4.2861	22.6075	21.1553	24.8551	21.4689	24.4205	23.9643	-1			3	3	3	173160000	12	8
P15531	P15531	Nucleoside diphosphate kinase A	NME1	0.0828204	-0.0811303	17.149	37.354	28.1082	27.432	28.1999	28.5822	28.2322	28.2829	-1			9	5	5	4040400000	11	113
O96008	O96008	Mitochondrial import receptor subunit TOM40 homolog	TOMM40	1.32827	-0.650305	37.893	81.464	27.2907	26.7655	27.9335	27.1753	27.7597	27.0922	-1	+	BicD2_Trbo_RFP-Trbo	6	6	6	2050600000	11	72
O95816	O95816	BAG family molecular chaperone regulator 2	BAG2	1.47877	-0.650342	23.772	47.679	27.8446	27.3294	28.1386	27.0536	28.0419	27.6911	-1	+	BicD2_Trbo_RFP-Trbo	8	8	8	2834700000	16	102
P62249	P62249	40S ribosomal protein S16	RPS16	2.78629	-0.654262	16.445	64.743	31.1091	30.3217	31.2017	30.5216	31.0714	30.5761	-1	+	BicD2_Trbo_RFP-Trbo	10	10	10	20884000000	12	159
P15927	P15927	Replication protein A 32 kDa subunit	RPA2	0.748675	-0.733013	29.247	37.084	26.9446	25.7157	27.6026	26.4592	26.3147	26.4881	-1			4	4	4	1366600000	12	41
P16152	P16152	Carbonyl reductase [NADPH] 1	CBR1	0.653117	-0.629616	30.375	258.4	28.3411	27.1891	28.9096	28.3291	28.6186	28.4622	-1			12	12	10	4718300000	18	166
P16403	P16403	Histone H1.2	HIST1H1C	0.14242	-0.121564	21.364	29.936	28.4711	28.5081	27.803	28.0669	28.7542	28.0886	-1			4	4	1	4769400000	13	74
P16615;Q93084	P16615	Sarcoplasmic/endoplasmic reticulum calcium ATPase 2	ATP2A2	0.40926	-0.242854	114.76	163.17	28.8145	28.3866	29.1895	29.1613	28.9384	28.6658	-1			24	24	15	5899600000	52	246
P16949	P16949	Stathmin	STMN1	0.37414	-0.366911	17.302	45.255	28.7692	28.3467	29.7929	29.3102	29.2046	29.0091	-1			6	6	4	7107600000	10	99
Q96BD8	Q96BD8	Spindle and kinetochore-associated protein 1	SKA1	2.13958	-0.656387	29.484	109.75	28.2832	27.7166	28.4329	27.9425	28.4411	27.529	-1	+	BicD2_Trbo_RFP-Trbo	8	8	8	3041500000	18	91
P17066;P48741	P17066;P48741	Heat shock 70 kDa protein 6;Putative heat shock 70 kDa protein 7	HSPA6;HSPA7	0.856529	-0.447121	71.027	9.8076	29.7469	28.9203	29.9104	29.345	29.6741	29.7247	-1			12	2	2	9373700000	39	71
P17174	P17174	Aspartate aminotransferase, cytoplasmic	GOT1	0.056282	-0.119935	46.247	33.068	25.9814	25.1514	27.2941	26.7918	25.4856	26.4581	-1			13	13	13	1247000000	26	72
P17612;P22694	P17612;P22694	cAMP-dependent protein kinase catalytic subunit alpha;cAMP-dependent protein kinase catalytic subunit beta	PRKACA;PRKACB	0.923039	-0.693782	40.589	6.2275	26.0848	24.6917	25.8913	25.4064	25.1576	24.9542	-1			4	4	3	562940000	20	23
P17655	P17655	Calpain-2 catalytic subunit	CAPN2	0.715647	-1.0094	79.994	17.784	25.3528	23.9432	26.3453	25.9029	26.1865	25.0103	-1			14	14	14	815070000	36	33
P17693	P17693	HLA class I histocompatibility antigen, alpha chain G	HLA-G	1.27952	-0.417177	38.224	1.8865	24.1294	23.5153	23.7793	23.3737	23.9955	23.7635	-1			2	1	1	132610000	20	11
P61024	P61024	Cyclin-dependent kinases regulatory subunit 1	CKS1B	1.39942	-0.656746	9.6601	2.0878	22.6788	21.7842	22.9184	22.4754	22.9005	22.2678	-1	+	BicD2_Trbo_RFP-Trbo	1	1	1	60027000	5	6
O15235	O15235	28S ribosomal protein S12, mitochondrial	MRPS12	2.85664	-0.662399	15.173	6.672	24.9563	24.1723	25.0342	24.4463	24.9584	24.3431	-1	+	BicD2_Trbo_RFP-Trbo	1	1	1	321760000	8	13
Q00341	Q00341	Vigilin	HDLBP	2.06379	-0.665146	141.45	168.61	29.8524	29.0242	30.0509	29.4347	29.8336	29.2826	-1	+	BicD2_Trbo_RFP-Trbo	41	41	41	8349800000	80	329
O15027	O15027	Protein transport protein Sec16A	SEC16A	1.51688	-0.665188	251.89	37.051	28.2862	27.3427	28.5063	27.705	27.9413	27.6906	-1	+	BicD2_Trbo_RFP-Trbo	21	21	21	2983400000	83	117
P17987	P17987	T-complex protein 1 subunit alpha	TCP1	0.844626	-0.511309	60.343	262.74	30.6539	29.8964	31.1291	30.6669	30.906	30.5917	-1			24	24	24	20143000000	35	476
P18031	P18031	Tyrosine-protein phosphatase non-receptor type 1	PTPN1	0.61278	-0.450845	49.966	3.882	25.1524	24.6017	25.7436	24.7175	25.2551	25.4794	-1			5	5	5	364320000	30	11
P18077	P18077	60S ribosomal protein L35a	RPL35A	1.25467	-0.438751	12.538	6.2334	27.7366	27.4201	28.0118	27.6656	27.8248	27.1713	-1			5	5	5	2667300000	9	65
P18085	P18085	ADP-ribosylation factor 4	ARF4	0.676623	-0.471591	20.511	238.57	29.565	28.8013	30.142	29.6224	29.689	29.5576	-1			9	9	4	9224200000	13	157
P18124	P18124	60S ribosomal protein L7	RPL7	1.30546	-0.665384	29.225	86.357	30.8475	29.8526	31.1456	30.499	30.6527	30.2981	-1	+	BicD2_Trbo_RFP-Trbo	11	11	11	18673000000	16	235
P18206	P18206	Vinculin	VCL	0.794522	-0.679491	123.8	123.87	27.981	26.8508	28.5227	27.64	28.1048	28.0793	-1			22	22	22	3277200000	84	150
O14744	O14744	Protein arginine N-methyltransferase 5;Protein arginine N-methyltransferase 5, N-terminally processed	PRMT5	1.63435	-0.667818	72.683	126.26	30.0289	28.9239	29.9397	29.3143	29.7826	29.5096	-1	+	BicD2_Trbo_RFP-Trbo	23	23	23	7269300000	37	197
O95835	O95835	Serine/threonine-protein kinase LATS1	LATS1	1.31651	-0.683307	126.87	5.6304	24.9364	23.8673	25.1449	24.3354	24.798	24.6266	-1	+	BicD2_Trbo_RFP-Trbo	4	4	4	293930000	58	12
P18669;Q8N0Y7;P15259	P18669	Phosphoglycerate mutase 1	PGAM1	0.127461	-0.164239	28.804	209.54	30.0405	29.5875	31.0103	30.8628	30.3047	30.4125	-1			11	11	11	17182000000	15	269
P17858	P17858	ATP-dependent 6-phosphofructokinase, liver type	PFKL	1.79168	-0.683917	85.018	102.7	27.7883	26.7771	27.8119	27.1214	27.7054	27.3555	-1	+	BicD2_Trbo_RFP-Trbo	18	15	14	2851300000	41	111
P18859	P18859	ATP synthase-coupling factor 6, mitochondrial	ATP5J	0.134527	0.184911	12.587	57.428	25.1066	25.2255	26.4198	25.9828	25.082	25.9548	-1			3	3	3	623540000	7	26
P17980	P17980	26S protease regulatory subunit 6A	PSMC3	1.3946	-0.686978	49.203	53.11	28.2115	27.5427	28.6935	27.5843	27.909	27.6262	-1	+	BicD2_Trbo_RFP-Trbo	13	13	13	3078400000	26	114
P46977	P46977	Dolichyl-diphosphooligosaccharide--protein glycosyltransferase subunit STT3A	STT3A	1.82421	-0.687356	80.529	4.9561	25.3561	24.5765	25.7049	25.0272	25.5079	24.9032	-1	+	BicD2_Trbo_RFP-Trbo	5	5	4	524330000	36	26
P19338	P19338	Nucleolin	NCL	0.565047	-0.372099	76.613	261.51	30.7364	30.1403	31.2758	30.9746	30.8501	30.6311	-1			18	18	18	21777000000	46	378
P19367	P19367	Hexokinase-1	HK1	0.237595	-0.691743	102.48	13.147	24.5867	22.8992	26.3136	26.3611	25.7672	25.332	-1			10	10	7	675070000	51	33
P19387	P19387	DNA-directed RNA polymerase II subunit RPB3	POLR2C	1.19186	-0.468362	31.441	15.495	26.2592	25.4558	25.869	25.9136	26.1893	25.543	-1			6	6	6	660060000	14	28
P19388	P19388	DNA-directed RNA polymerases I, II, and III subunit RPABC1	POLR2E	0.926083	-2.47887	24.551	23.668	26.8124	25.4823	27.1344	25.5905	26.4021	21.8394	-1			5	5	5	821690000	13	30
P19404	P19404	NADH dehydrogenase [ubiquinone] flavoprotein 2, mitochondrial	NDUFV2	0.556941	-0.95976	27.391	2.5251	22.3913	20.4354	23.4442	22.3875	21.767	21.9004	-1			2	2	2	56347000	17	5
Q6P2Q9	Q6P2Q9	Pre-mRNA-processing-splicing factor 8	PRPF8	1.56061	-0.688278	273.6	179.1	29.578	28.7872	29.9414	29.1977	29.8835	29.3531	-1	+	BicD2_Trbo_RFP-Trbo	55	55	55	7581000000	145	342
P51991	P51991	Heterogeneous nuclear ribonucleoprotein A3	HNRNPA3	1.47904	-0.69037	39.594	48.261	28.8295	28.0453	29.0754	28.6667	28.9404	28.0623	-1	+	BicD2_Trbo_RFP-Trbo	10	10	10	4391100000	20	126
P19623	P19623	Spermidine synthase	SRM	0.312142	-0.362315	33.824	54.659	27.7994	26.7846	28.2986	28.246	28.0181	27.9986	-1			10	10	10	3108400000	16	112
P19784	P19784	Casein kinase II subunit alpha	CSNK2A2	0.671768	-0.87414	41.213	7.2621	25.6827	23.6902	25.6176	25.7149	25.4045	24.6773	-1			5	5	5	516390000	23	20
P20020;Q16720;P23634;Q01814	P20020;Q16720;P23634	Plasma membrane calcium-transporting ATPase 1;Plasma membrane calcium-transporting ATPase 3;Plasma membrane calcium-transporting ATPase 4	ATP2B1;ATP2B3;ATP2B4	0.369143	-0.299715	134.68	6.1919	25.0196	24.2957	25.4924	24.9958	24.604	24.9254	-1			3	3	3	326230000	65	9
P39023;Q92901	P39023	60S ribosomal protein L3	RPL3	1.34819	-0.692026	46.108	202.18	31.0237	30.1707	31.4848	30.8489	31.1473	30.5602	-1	+	BicD2_Trbo_RFP-Trbo	14	14	14	22854000000	22	367
P20073	P20073	Annexin A7	ANXA7	0.473594	0.618228	52.739	5.0711	23.3924	24.156	24.4777	25.4386	24.7999	24.9301	-1			4	4	4	339550000	23	21
P20290	P20290	Transcription factor BTF3	BTF3	0.956609	-0.634333	22.168	74.273	28.5619	27.5337	28.8871	28.5519	28.6646	28.1249	-1			4	4	4	4302700000	13	94
P20339	P20339	Ras-related protein Rab-5A	RAB5A	0.313925	0.452201	23.658	10.231	21.8543	22.6006	22.936	21.8877	21.8259	23.4844	-1			4	2	2	106600000	14	4
P20340;Q9NRW1;Q14964	P20340;Q9NRW1	Ras-related protein Rab-6A;Ras-related protein Rab-6B	RAB6A;RAB6B	0.255316	-0.230914	23.593	30.847	26.9339	26.4054	27.5764	27.066	26.5476	26.8938	-1			5	5	5	1378200000	17	28
P20585	P20585	DNA mismatch repair protein Msh3	MSH3	1.18308	-1.51593	127.41	2.4118	22.652	22.5658	23.5671	21.6819	24.5321	21.9557	-1			2	2	2	105960000	68	1
P20618	P20618	Proteasome subunit beta type-1	PSMB1	0.357871	0.353172	26.489	20.582	26.3487	26.2133	26.5835	27.0068	26.7887	27.5603	-1			9	9	9	1446600000	15	34
P20674	P20674	Cytochrome c oxidase subunit 5A, mitochondrial	COX5A	0.0566779	0.164466	16.762	10.084	24.0525	24.1188	25.8968	26.8956	25.753	25.1813	-1			3	3	3	658380000	11	32
Q14152	Q14152	Eukaryotic translation initiation factor 3 subunit A	EIF3A	1.31024	-0.693916	166.57	174.51	29.8201	28.9728	30.2842	29.6581	30.1143	29.506	-1	+	BicD2_Trbo_RFP-Trbo	34	34	34	9818800000	93	391
P20810	P20810	Calpastatin	CAST	0.0422536	-0.0471446	76.572	12.252	25.4061	24.83	25.8516	25.7226	24.9114	25.4751	-1			3	3	3	469790000	37	21
P20839	P20839	Inosine-5-monophosphate dehydrogenase 1	IMPDH1	0.15375	-0.308851	55.405	9.4677	26.0633	24.3487	25.0994	24.2677	23.8303	25.4501	-1			7	7	7	414390000	23	18
P21266	P21266	Glutathione S-transferase Mu 3	GSTM3	0.1307	0.174011	26.559	10.584	24.7641	24.6981	25.7449	26.0637	25.0712	25.3404	-1			5	5	5	522140000	19	29
P21281;P15313	P21281	V-type proton ATPase subunit B, brain isoform	ATP6V1B2	0.466088	-0.570848	56.5	26.338	26.7304	25.5795	27.307	27.2281	27.2915	26.8087	-1			9	9	9	1466700000	29	73
Q9UPQ9	Q9UPQ9	Trinucleotide repeat-containing gene 6B protein	TNRC6B	3.92231	-0.694293	194	146.81	28.8131	28.0536	28.732	28.002	28.722	28.1287	-1	+	BicD2_Trbo_RFP-Trbo	29	29	29	5273100000	78	188
Q15365;P57723	Q15365	Poly(rC)-binding protein 1	PCBP1	1.53851	-0.696002	37.497	248.81	30.8078	29.8109	31.0662	30.2599	30.6189	30.334	-1	+	BicD2_Trbo_RFP-Trbo	16	16	11	18514000000	20	321
P21796	P21796	Voltage-dependent anion-selective channel protein 1	VDAC1	0.098098	-0.159239	30.772	230.54	28.3841	28.3143	29.9018	29.4028	29.3783	29.4694	-1			15	15	15	8371300000	18	190
P21912	P21912	Succinate dehydrogenase [ubiquinone] iron-sulfur subunit, mitochondrial	SDHB	0.153428	-0.178116	31.629	9.6523	24.86	24.2628	25.1913	25.6845	25.323	24.8927	-1			5	5	5	489780000	22	27
Q13188	Q13188	Serine/threonine-protein kinase 3;Serine/threonine-protein kinase 3 36kDa subunit;Serine/threonine-protein kinase 3 20kDa subunit	STK3	1.38755	-0.698118	56.3	10.25	25.8588	24.8542	26.1794	25.2959	25.6409	25.4346	-1	+	BicD2_Trbo_RFP-Trbo	9	4	4	518680000	29	24
P22059	P22059	Oxysterol-binding protein 1	OSBP	0.222013	-0.295031	89.42	3.131	22.4358	23.1328	22.7856	22.9261	23.7204	21.9978	-1			3	3	3	69491000	49	0
P22061	P22061	Protein-L-isoaspartate(D-aspartate) O-methyltransferase	PCMT1	0.759439	-1.55343	24.636	4.9928	25.0779	22.8491	23.4215	22.6341	22.6056	20.9615	-1			4	4	4	139060000	11	2
P84022;Q15796;O15198	P84022;Q15796;O15198	Mothers against decapentaplegic homolog 3;Mothers against decapentaplegic homolog 2;Mothers against decapentaplegic homolog 9	SMAD3;SMAD2;SMAD9	1.68163	-0.699074	48.08	1.7741	23.6839	22.5819	23.7168	23.0476	23.3973	23.0712	-1	+	BicD2_Trbo_RFP-Trbo	1	1	1	112060000	21	7
P22102	P22102	Trifunctional purine biosynthetic protein adenosine-3;Phosphoribosylamine--glycine ligase;Phosphoribosylformylglycinamidine cyclo-ligase;Phosphoribosylglycinamide formyltransferase	GART	1.25031	-0.788046	107.77	323.31	30.9146	29.83	31.3837	30.7151	31.0115	30.4005	-1			41	41	41	23370000000	56	559
P22234	P22234	Multifunctional protein ADE2;Phosphoribosylaminoimidazole-succinocarboxamide synthase;Phosphoribosylaminoimidazole carboxylase	PAICS	1.07321	0.391074	47.079	289.6	30.0572	30.3912	30.478	30.7474	30.1242	30.6941	-1			17	17	17	16556000000	26	366
P22307	P22307	Non-specific lipid-transfer protein	SCP2	0.0798811	0.0581894	58.993	6.4557	24.788	25.4069	25.626	25.3657	25.3729	25.1888	-1			5	5	5	558270000	32	26
P22314	P22314	Ubiquitin-like modifier-activating enzyme 1	UBA1	0.340752	-0.390771	117.85	323.31	30.3571	29.7986	31.4143	31.0175	30.8938	30.6767	-1			39	39	39	23478000000	56	615
P22392;O60361	P22392;O60361	Nucleoside diphosphate kinase B;Putative nucleoside diphosphate kinase	NME2;NME2P1	0.121226	-0.129014	17.298	84.147	30.48	30.2231	31.3817	31.1845	30.8591	30.9262	-1			10	10	6	24050000000	12	250
P22612	P22612	cAMP-dependent protein kinase catalytic subunit gamma	PRKACG	0.706076	-0.447357	40.434	5.7665	25.0652	23.9622	24.9003	24.9012	24.9331	24.6931	-1			2	1	1	293330000	20	8
P22626	P22626	Heterogeneous nuclear ribonucleoproteins A2/B1	HNRNPA2B1	0.366159	-0.2606	37.429	118.4	30.2387	29.7703	30.8481	30.5394	30.342	30.3373	-1			15	15	14	15037000000	19	240
P22695	P22695	Cytochrome b-c1 complex subunit 2, mitochondrial	UQCRC2	0.813618	-0.576432	48.442	73.582	27.8338	26.7712	28.1144	27.7826	27.5982	27.2633	-1			11	11	11	2396400000	23	107
Q15560;P23193	Q15560;P23193	Transcription elongation factor A protein 2;Transcription elongation factor A protein 1	TCEA2;TCEA1	0.817573	0.893874	33.6	1.8851	22.2594	21.9514	22.0346	23.2809	21.766	23.5093	-1			1	1	1	75041000	19	2
P23246	P23246	Splicing factor, proline- and glutamine-rich	SFPQ	0.786956	-0.582032	76.149	74.67	28.6359	27.5848	28.9145	28.7154	28.8183	28.3225	-1			11	10	10	4518600000	32	109
P23258;Q9NRH3	P23258;Q9NRH3	Tubulin gamma-1 chain;Tubulin gamma-2 chain	TUBG1;TUBG2	0.366119	-0.448099	51.169	26.264	26.047	26.6273	27.7372	26.6775	27.1208	26.256	-1			11	11	11	1687700000	21	70
P23284	P23284	Peptidyl-prolyl cis-trans isomerase B	PPIB	0.521981	-0.611003	23.742	11.512	26.9974	26.1878	27.8203	27.4189	26.8102	26.1881	-1			7	7	7	1830500000	16	75
P23368	P23368	NAD-dependent malic enzyme, mitochondrial	ME2	0.00418673	-0.00846354	65.443	11.729	26.0214	24.4331	25.6764	26.4458	25.4575	26.2511	-1			8	8	8	768780000	30	32
P23381	P23381	Tryptophan--tRNA ligase, cytoplasmic;T1-TrpRS;T2-TrpRS	WARS	0.570754	0.440055	53.165	75.747	27.636	27.7711	28.2764	28.4588	27.393	28.3957	-1			11	11	11	3050500000	29	114
P62753	P62753	40S ribosomal protein S6	RPS6	2.24062	-0.702298	28.68	123.67	30.5799	29.8138	30.8593	30.1498	30.6208	29.9896	-1	+	BicD2_Trbo_RFP-Trbo	7	7	7	15400000000	13	158
P23526	P23526	Adenosylhomocysteinase	AHCY	0.303015	-0.263116	47.716	132.3	29.069	28.8285	29.9836	29.6318	29.5346	29.3375	-1			17	17	17	8413500000	23	233
P23528	P23528	Cofilin-1	CFL1	0.125112	-0.15865	18.502	241.6	30.1944	29.823	31.2205	31.0154	30.4528	30.5533	-1			10	10	7	20333000000	12	215
P09661	P09661	U2 small nuclear ribonucleoprotein A	SNRPA1	1.30175	-0.706014	28.415	36.072	26.4003	25.6614	26.9166	26.1532	26.8995	26.2838	-1	+	BicD2_Trbo_RFP-Trbo	8	8	8	1162700000	14	58
P23919	P23919	Thymidylate kinase	DTYMK	0.0907123	-0.444546	23.819	4.2638	22.6819	21.6012	23.7148	23.5965	26.3951	26.2604	-1			5	5	5	442120000	18	12
P23921	P23921	Ribonucleoside-diphosphate reductase large subunit	RRM1	0.458265	-0.420047	90.069	59.747	27.9299	27.0774	28.5708	28.026	27.6375	27.7747	-1			17	17	17	2955000000	44	121
P24534	P24534	Elongation factor 1-beta	EEF1B2	0.379736	-0.482224	24.763	158.8	29.0789	27.8998	29.7585	29.5188	29.1694	29.1414	-1			9	8	8	7708500000	14	146
P24539	P24539	ATP synthase F(0) complex subunit B1, mitochondrial	ATP5F1	0.115924	-0.167449	28.908	11.48	26.4847	25.961	27.563	27.218	26.8504	27.2169	-1			7	7	7	1497800000	17	39
P24666	P24666	Low molecular weight phosphotyrosine protein phosphatase	ACP1	0.918241	-1.614	18.042	29.501	25.8759	23.074	26.8539	24.7713	25.3466	25.3891	-1			6	6	6	546510000	10	38
P24752	P24752	Acetyl-CoA acetyltransferase, mitochondrial	ACAT1	0.32951	-0.51893	45.199	63.804	26.7347	26.1475	28.4468	27.321	26.9466	27.1027	-1			10	10	10	2426500000	26	72
P24928	P24928	DNA-directed RNA polymerase II subunit RPB1	POLR2A	0.478568	-0.333238	217.17	5.6901	24.4354	24.5715	25.226	24.7908	24.8183	24.1176	-1			6	6	6	303980000	109	6
P24941;Q00526	P24941;Q00526	Cyclin-dependent kinase 2;Cyclin-dependent kinase 3	CDK2;CDK3	0.298709	-0.644542	33.929	8.9677	24.3331	23.3027	26.0073	25.1335	23.7433	23.7139	-1			6	4	4	318210000	21	15
Q14254	Q14254	Flotillin-2	FLOT2	1.69948	-0.706172	47.064	75.395	28.6793	27.6034	28.6922	27.888	28.4134	28.1751	-1	+	BicD2_Trbo_RFP-Trbo	16	16	16	3584000000	33	144
Q14498	Q14498	RNA-binding protein 39	RBM39	2.36761	-0.706685	59.379	109.95	27.7782	26.9854	27.9685	27.2385	27.6444	27.047	-1	+	BicD2_Trbo_RFP-Trbo	10	10	10	2027200000	26	71
P25325	P25325	3-mercaptopyruvate sulfurtransferase	MPST	0.790201	-0.914375	33.178	7.2982	25.3764	23.5717	24.5158	24.3092	25.6944	24.9626	-1			4	4	4	371570000	19	11
P25398	P25398	40S ribosomal protein S12	RPS12	0.595063	-0.758347	14.515	98.945	29.6379	28.091	30.2441	29.914	29.605	29.207	-1			6	6	6	10198000000	7	149
P25490	P25490	Transcriptional repressor protein YY1	YY1	0.305769	-0.399748	44.712	2.8882	22.9538	22.3519	22.4084	21.3573	22.6604	23.1141	-1			1	1	1	39116000	18	5
O43482	O43482	Protein Mis18-beta	OIP5	1.58101	-0.707251	24.691	68.41	27.243	26.5598	27.1223	26.4528	27.651	26.8819	-1	+	BicD2_Trbo_RFP-Trbo	7	7	7	1944900000	13	73
P25705	P25705	ATP synthase subunit alpha, mitochondrial	ATP5A1	0.284003	-0.243216	59.75	323.31	30.9104	30.4622	31.6281	31.3846	31.0957	31.0578	-1			22	22	22	26391000000	36	489
P25786	P25786	Proteasome subunit alpha type-1	PSMA1	0.840856	-0.446327	29.555	115.04	28.1665	27.3082	28.3441	27.9787	27.8309	27.7155	-1			8	8	8	3172600000	18	95
P25787	P25787	Proteasome subunit alpha type-2	PSMA2	0.119053	0.121859	25.898	78.494	27.3105	26.9466	27.7544	27.9966	27.0067	27.494	-1			8	8	8	2271400000	13	83
P25788	P25788	Proteasome subunit alpha type-3	PSMA3	0.680074	-0.459558	28.433	29.429	25.6173	25.3996	26.602	25.7123	26.0333	25.7619	-1			7	7	7	1284700000	14	43
P25789	P25789	Proteasome subunit alpha type-4	PSMA4	0.705131	-0.373034	29.483	36.399	28.0057	27.4043	27.8677	27.962	28.4421	27.8301	-1			8	8	8	2791400000	14	106
P26038	P26038	Moesin	MSN	0.834654	-1.82561	67.819	9.6699	23.8416	20.8899	25.1469	22.3697	23.7984	24.0504	-1			11	5	5	204870000	40	12
P10398	P10398	Serine/threonine-protein kinase A-Raf	ARAF	2.94008	-0.708651	67.585	7.3684	26.2125	25.4376	26.1482	25.5431	26.3704	25.6244	-1	+	BicD2_Trbo_RFP-Trbo	8	8	5	592260000	35	23
P26232	P26232	Catenin alpha-2	CTNNA2	0.561103	-1.22894	105.31	2.8382	23.6456	20.807	23.9455	23.829	24.231	23.4992	-1			5	1	1	129100000	57	9
P26358	P26358	DNA (cytosine-5)-methyltransferase 1	DNMT1	0.881115	-0.531898	183.16	13.015	27.5999	26.8615	28.1852	27.4035	27.5527	27.4771	-1			9	9	9	3169900000	91	48
P26373	P26373	60S ribosomal protein L13	RPL13	1.57086	-0.709877	24.261	101.27	30.1253	29.2764	30.5153	29.8597	30.3313	29.7062	-1	+	BicD2_Trbo_RFP-Trbo	8	8	8	11554000000	14	105
Q14789	Q14789	Golgin subfamily B member 1	GOLGB1	1.95677	-0.712519	376.01	19.901	28.5877	27.9444	28.263	27.5368	28.3642	27.5962	-1	+	BicD2_Trbo_RFP-Trbo	2	2	2	3961500000	226	30
P26583	P26583	High mobility group protein B2	HMGB2	0.0921168	0.105703	24.033	16.738	25.9278	26.1039	26.7898	27.1032	26.8054	26.633	-1			5	4	4	1290800000	13	60
Q8N8S7;Q9UI08	Q8N8S7	Protein enabled homolog	ENAH	1.77242	-0.713107	66.509	28.706	27.392	26.8198	27.9023	27.0303	27.8143	27.119	-1	+	BicD2_Trbo_RFP-Trbo	11	11	11	1724600000	25	72
P26639;A2RTX5	P26639	Threonine--tRNA ligase, cytoplasmic	TARS	0.622207	-0.470012	83.434	176.69	29.7615	28.9762	30.256	30.0322	29.8754	29.4744	-1			31	31	31	10423000000	47	402
P26640	P26640	Valine--tRNA ligase	VARS	0.53059	-0.312295	140.47	126.96	28.4933	27.9331	28.8008	28.7746	28.7	28.3495	-1			27	27	27	4409500000	65	190
P26641	P26641	Elongation factor 1-gamma	EEF1G	0.766674	-0.655338	50.118	230.93	30.9346	29.642	31.3199	30.6301	30.4781	30.4944	-1			22	22	22	21301000000	27	398
P26885	P26885	Peptidyl-prolyl cis-trans isomerase FKBP2	FKBP2	0.205938	-0.249702	15.649	2.0634	22.3473	22.0834	23.5477	23.1415	22.711	22.632	-1			1	1	1	82935000	8	3
P27144	P27144	Adenylate kinase 4, mitochondrial	AK4	0.408545	0.437211	25.268	2.9026	22.9859	23.6121	23.6196	24.5991	23.5165	23.2225	-1			2	2	2	120340000	14	4
P27348	P27348	14-3-3 protein theta	YWHAQ	0.690978	-0.391321	27.764	323.31	29.3587	28.74	29.7823	29.5115	29.5378	29.2533	-1			12	8	8	8795400000	18	148
P27448	P27448	MAP/microtubule affinity-regulating kinase 3	MARK3	0.458629	-0.650864	84.428	4.5001	23.8104	24.1279	25.64	24.6068	25.5566	24.3198	-1			4	4	2	284690000	46	10
P40429;Q6NVV1	P40429;Q6NVV1	60S ribosomal protein L13a;Putative 60S ribosomal protein L13a protein RPL13AP3	RPL13A;RPL13AP3	1.94735	-0.713181	23.577	53.677	29.8291	28.9627	30.0869	29.4409	29.9249	29.2977	-1	+	BicD2_Trbo_RFP-Trbo	6	6	6	9639100000	17	99
P27694	P27694	Replication protein A 70 kDa DNA-binding subunit;Replication protein A 70 kDa DNA-binding subunit, N-terminally processed	RPA1	1.24923	-1.24257	68.137	51.56	27.4854	25.8297	28.2748	26.7249	27.7336	27.2114	-1			9	9	9	2177200000	33	98
P27695	P27695	DNA-(apurinic or apyrimidinic site) lyase;DNA-(apurinic or apyrimidinic site) lyase, mitochondrial	APEX1	0.012748	-0.0280584	35.554	140.96	27.1706	26.7902	28.7488	28.6964	27.7372	28.0859	-1			10	10	10	3095700000	18	96
P27708	P27708	CAD protein;Glutamine-dependent carbamoyl-phosphate synthase;Aspartate carbamoyltransferase;Dihydroorotase	CAD	0.250013	-0.18424	242.98	250.11	29.436	28.9618	29.8877	29.8495	29.5623	29.5219	-1			56	56	56	12161000000	108	413
P27797	P27797	Calreticulin	CALR	0.311681	-0.442253	48.141	211.47	29.8398	28.926	30.8858	30.5881	30.1867	30.0715	-1			17	17	17	14116000000	24	237
Q9UBQ5	Q9UBQ5	Eukaryotic translation initiation factor 3 subunit K	EIF3K	1.52736	-0.713861	25.059	21.21	27.5904	26.6783	27.8998	26.8474	27.3706	27.1935	-1	+	BicD2_Trbo_RFP-Trbo	4	4	4	1863600000	11	52
P27824;O14967	P27824	Calnexin	CANX	0.598183	-0.581333	67.567	220.27	29.656	28.6782	30.4354	29.8789	29.836	29.6263	-1			13	13	13	10839000000	27	225
P28066	P28066	Proteasome subunit alpha type-5	PSMA5	0.308444	-0.236877	26.411	70.241	28.0694	27.4572	28.4805	28.3759	27.9244	27.9305	-1			10	10	10	3443700000	11	109
P28070	P28070	Proteasome subunit beta type-4	PSMB4	0.195259	-0.156364	29.204	17.433	27.0148	26.4783	27.4289	27.2255	26.6795	26.9502	-1			6	6	6	1446800000	11	41
P28072	P28072	Proteasome subunit beta type-6	PSMB6	0.32583	0.34482	25.357	22.301	26.6524	25.9127	25.4343	26.7506	26.1146	26.5724	-1			4	4	4	1115600000	11	40
P28074	P28074	Proteasome subunit beta type-5	PSMB5	0.187924	-0.165681	28.48	37.534	26.7005	26.1117	27.1691	27.08	26.5767	26.7576	-1			7	7	7	1355900000	16	56
P28288	P28288	ATP-binding cassette sub-family D member 3	ABCD3	0.735131	-0.56219	75.475	26.857	26.5929	26.1237	27.4369	26.9456	27.2697	26.5437	-1			11	11	11	1409800000	43	50
P28331	P28331	NADH-ubiquinone oxidoreductase 75 kDa subunit, mitochondrial	NDUFS1	0.803179	-1.86586	79.467	3.9056	24.3582	20.8811	23.7345	21.9088	21.0624	20.7676	-1			3	3	3	62510000	41	3
P33993	P33993	DNA replication licensing factor MCM7	MCM7	2.17448	-0.71703	81.307	142.34	29.0429	28.2785	29.2597	28.5261	28.8937	28.2406	-1	+	BicD2_Trbo_RFP-Trbo	23	23	23	5812200000	48	232
Q96II8	Q96II8	Leucine-rich repeat and calponin homology domain-containing protein 3	LRCH3	1.95856	-0.718235	86.082	54.178	27.5366	27.2325	27.8918	27.0537	28.0227	27.0102	-1	+	BicD2_Trbo_RFP-Trbo	15	14	14	1856200000	35	93
P28838	P28838	Cytosol aminopeptidase	LAP3	0.161133	-0.283124	56.166	8.1151	24.1025	24.3786	26.016	25.1891	25.6544	25.3557	-1			6	6	6	461960000	34	16
P29144	P29144	Tripeptidyl-peptidase 2	TPP2	0.87147	-2.03682	138.35	15.751	25.305	21.2403	25.9535	24.2664	24.7562	24.3976	-1			9	9	9	513050000	70	17
P29218	P29218	Inositol monophosphatase 1	IMPA1	0.946948	-1.84669	30.188	2.0152	22.3942	21.18	25.1602	22.1366	23.975	22.6728	-1			3	3	3	113750000	17	4
P28340	P28340	DNA polymerase delta catalytic subunit	POLD1	1.38031	-0.718803	123.63	5.8914	24.0225	23.4395	23.6628	23.3105	23.9565	22.7354	-1	+	BicD2_Trbo_RFP-Trbo	4	4	4	130130000	72	2
P29401	P29401	Transketolase	TKT	0.368261	-0.364889	67.877	136.57	29.161	28.3244	29.7994	29.5128	29.2415	29.2701	-1			18	18	18	8261000000	33	201
P29558;Q6XE24	P29558;Q6XE24	RNA-binding motif, single-stranded-interacting protein 1;RNA-binding motif, single-stranded-interacting protein 3	RBMS1;RBMS3	1.21711	-1.72039	44.505	2.5183	24.1628	21.4406	23.5346	23.3092	23.5935	21.38	-1			2	2	2	60696000	15	3
P29692	P29692	Elongation factor 1-delta	EEF1D	0.220299	-0.360672	31.121	173.36	28.3342	27.6255	29.6175	29.37	29.0064	28.8806	-1			13	13	12	6218700000	20	146
P29966	P29966	Myristoylated alanine-rich C-kinase substrate	MARCKS	0.844592	-0.600222	31.554	57.302	28.2744	27.1772	28.4462	28.2672	28.1301	27.6057	-1			9	9	8	2946100000	11	87
P62873;P16520	P62873	Guanine nucleotide-binding protein G(I)/G(S)/G(T) subunit beta-1	GNB1	2.65951	-0.718903	37.377	323.31	30.9773	30.0605	30.9424	30.2625	30.9728	30.4129	-1	+	BicD2_Trbo_RFP-Trbo	15	15	8	21804000000	13	351
P30040	P30040	Endoplasmic reticulum resident protein 29	ERP29	0.438375	-1.54414	28.993	8.0428	26.5836	22.4068	25.1444	27.2398	27.02	24.469	-1			5	5	5	741650000	15	33
P30041	P30041	Peroxiredoxin-6	PRDX6	0.129742	-0.169839	25.035	111.9	29.7211	29.3508	30.7646	30.6064	30.2455	30.2645	-1			15	15	15	14863000000	16	266
P30043	P30043	Flavin reductase (NADPH)	BLVRB	0.196596	-0.330691	22.119	10.094	24.8444	24.414	25.9951	26.2416	25.8347	25.0264	-1			6	6	6	728070000	11	33
P30044	P30044	Peroxiredoxin-5, mitochondrial	PRDX5	0.0421603	0.080822	22.086	13.655	24.0463	25.2561	26.1048	25.6909	25.7339	25.1804	-1			5	5	5	649420000	13	40
Q14126	Q14126	Desmoglein-2	DSG2	3.59885	-0.718918	122.29	245.64	29.505	28.6977	29.5739	28.839	29.464	28.8494	-1	+	BicD2_Trbo_RFP-Trbo	16	16	16	7015000000	51	259
P30048	P30048	Thioredoxin-dependent peroxide reductase, mitochondrial	PRDX3	0.294476	-0.379036	27.692	64.751	29.2212	28.3297	30.077	29.8429	29.4941	29.4826	-1			7	7	7	9662400000	13	168
P30049	P30049	ATP synthase subunit delta, mitochondrial	ATP5D	0.542843	-0.495817	17.49	4.2297	24.5512	23.748	25.328	24.8556	24.6957	24.4839	-1			1	1	1	322930000	5	13
P30050	P30050	60S ribosomal protein L12	RPL12	0.886981	-0.589973	17.818	323.31	30.4609	29.6628	31.0652	30.4953	30.7466	30.3447	-1			6	6	6	17975000000	11	168
P30084	P30084	Enoyl-CoA hydratase, mitochondrial	ECHS1	0.423395	-0.564094	31.387	34.956	27.7381	26.2881	28.3583	27.8061	27.2654	27.5754	-1			10	10	10	2629800000	20	114
P30085	P30085	UMP-CMP kinase	CMPK1	0.126322	-0.238971	22.222	18.226	25.4375	24.7258	26.9135	26.3428	25.5735	26.139	-1			4	4	4	911860000	11	45
P30086	P30086	Phosphatidylethanolamine-binding protein 1;Hippocampal cholinergic neurostimulating peptide	PEBP1	0.713879	-0.731333	21.057	323.31	29.661	28.5563	30.5202	29.8621	30.0038	29.5728	-1			11	11	11	11965000000	11	222
P30101	P30101	Protein disulfide-isomerase A3	PDIA3	0.254481	-0.376335	56.782	134.34	29.3692	28.4567	30.3668	30.1762	29.6425	29.6168	-1			20	19	19	9942000000	32	280
P30153;P30154	P30153	Serine/threonine-protein phosphatase 2A 65 kDa regulatory subunit A alpha isoform	PPP2R1A	0.257115	-0.196927	65.308	190.96	29.3008	28.719	29.5462	29.6846	29.596	29.4486	-1			21	21	21	9154700000	39	263
P30260	P30260	Cell division cycle protein 27 homolog	CDC27	0.788755	-1.18806	91.866	11.97	25.7617	22.8689	24.5862	24.955	25.1758	24.1356	-1			6	6	6	324890000	41	23
P14174	P14174	Macrophage migration inhibitory factor	MIF	1.32245	-0.723179	12.476	17.096	28.4364	27.7545	29.0937	28.2109	28.8929	28.2881	-1	+	BicD2_Trbo_RFP-Trbo	3	3	3	5056300000	4	59
P30405	P30405	Peptidyl-prolyl cis-trans isomerase F, mitochondrial	PPIF	0.22285	-0.498103	22.04	8.5814	24.4423	23.3836	26.0697	25.9168	25.1051	24.8224	-1			6	5	4	486850000	16	24
Q13868	Q13868	Exosome complex component RRP4	EXOSC2	2.17824	-0.723865	32.789	4.0652	25.0557	24.4944	25.4051	24.4046	24.9661	24.3563	-1	+	BicD2_Trbo_RFP-Trbo	2	2	2	348630000	18	12
P30519	P30519	Heme oxygenase 2	HMOX2	0.103498	0.322035	36.032	4.049	23.6528	22.5152	21.4606	24.8278	24.395	23.1316	-1			4	4	4	155060000	18	3
P30520;Q8N142	P30520	Adenylosuccinate synthetase isozyme 2	ADSS	0.097795	-0.125069	50.097	36.248	27.2348	26.6395	27.7851	28.1184	27.6043	27.4912	-1			13	13	13	2513300000	28	129
P30566	P30566	Adenylosuccinate lyase	ADSL	0.958039	-0.68453	54.889	31.711	26.8394	26.5148	27.5571	26.0996	27.2755	27.004	-1			8	8	8	1627200000	31	64
P62701;Q8TD47;P22090	P62701	40S ribosomal protein S4, X isoform	RPS4X	1.48764	-0.724797	29.597	198.95	31.1601	30.2084	31.4986	30.8851	31.1592	30.55	-1	+	BicD2_Trbo_RFP-Trbo	16	16	16	23279000000	20	294
P30837	P30837	Aldehyde dehydrogenase X, mitochondrial	ALDH1B1	0.667488	-0.867484	57.206	10.926	24.7925	23.6214	25.8219	25.2514	24.8907	24.0298	-1			7	6	6	326450000	25	13
P30876	P30876	DNA-directed RNA polymerase II subunit RPB2	POLR2B	0.495275	-0.207879	133.9	34.529	27.3939	26.7351	27.0081	27.1819	27.0167	26.8781	-1			13	13	13	1536000000	68	70
P31040	P31040	Succinate dehydrogenase [ubiquinone] flavoprotein subunit, mitochondrial	SDHA	0.0723235	-0.173453	72.691	88.346	27.0976	25.2484	27.0995	27.7464	27.1113	27.7932	-1			12	12	12	2061500000	35	91
P31150	P31150	Rab GDP dissociation inhibitor alpha	GDI1	0.409588	-0.426364	50.582	18.975	26.2016	24.9457	26.372	25.8167	25.8275	26.3595	-1			16	8	8	871660000	26	41
P31153;Q00266	P31153	S-adenosylmethionine synthase isoform type-2	MAT2A	0.497766	-0.373995	43.66	156.16	28.1717	27.6505	28.5915	28.6026	28.7753	28.1633	-1			11	11	11	4281100000	21	115
P31323	P31323	cAMP-dependent protein kinase type II-beta regulatory subunit	PRKAR2B	0.775694	-0.917269	46.302	2.7266	22.4557	21.005	23.0849	21.5024	22.4069	22.6883	-1			2	2	2	45877000	25	4
Q8TC07;REV__Q9C073	Q8TC07	TBC1 domain family member 15	TBC1D15	1.35153	-0.726466	79.49	19.168	26.4737	25.3067	26.3996	25.6929	26.4768	26.1711	-1	+	BicD2_Trbo_RFP-Trbo	12	12	12	779280000	37	26
P31689	P31689	DnaJ homolog subfamily A member 1	DNAJA1	0.759938	-0.574649	44.868	65.85	28.7281	28.1116	29.6102	28.9042	29.0418	28.6404	-1			11	11	11	5664900000	22	133
P31930	P31930	Cytochrome b-c1 complex subunit 1, mitochondrial	UQCRC1	0.368627	-0.567221	52.645	43.152	26.4778	25.3749	27.6765	27.0246	26.9087	26.9619	-1			10	10	10	1516200000	25	70
P31939	P31939	Bifunctional purine biosynthesis protein PURH;Phosphoribosylaminoimidazolecarboxamide formyltransferase;IMP cyclohydrolase	ATIC	0.141709	-0.195534	64.615	152.73	28.6229	28.106	29.6186	29.5283	28.8183	28.8389	-1			26	26	26	6386900000	37	259
P31942	P31942	Heterogeneous nuclear ribonucleoprotein H3	HNRNPH3	0.0101888	-0.0310561	36.926	5.0114	24.5023	25.2127	22.467	23.5329	24.7019	22.8324	-1			4	3	3	252840000	20	19
Q96A19	Q96A19	Coiled-coil domain-containing protein 102A	CCDC102A	1.38859	-0.727314	62.595	41.751	27.1726	26.3358	27.0734	26.7385	26.9364	25.9261	-1	+	BicD2_Trbo_RFP-Trbo	10	10	10	1201400000	32	47
P31946	P31946	14-3-3 protein beta/alpha;14-3-3 protein beta/alpha, N-terminally processed	YWHAB	0.306666	-0.298234	28.082	165.09	28.4768	28.0238	29.3846	29.0113	28.7119	28.6435	-1			12	7	7	5719800000	17	140
P31948	P31948	Stress-induced-phosphoprotein 1	STIP1	0.448457	-0.431918	62.639	131.01	29.2771	28.0291	29.394	29.2839	29.1638	29.2261	-1			22	22	22	7352500000	43	234
P31949	P31949	Protein S100-A11;Protein S100-A11, N-terminally processed	S100A11	0.473536	-0.534747	11.74	5.0872	23.819	22.7589	24.347	24.3671	24.0442	23.48	-1			2	2	2	216190000	6	9
P32119	P32119	Peroxiredoxin-2	PRDX2	0.107577	-0.121567	21.892	123.3	29.6295	29.3034	30.4387	30.3835	30.166	30.1826	-1			9	8	8	13813000000	11	148
P32121	P32121	Beta-arrestin-2	ARRB2	1.29186	-1.75562	46.105	9.7218	25.7469	22.5012	25.4806	24.4298	25.2654	24.295	-1			5	5	5	288400000	20	23
P32189;Q14409	P32189;Q14409	Glycerol kinase;Putative glycerol kinase 3	GK;GK3P	0.170798	-0.367803	61.244	6.3514	24.691	22.2614	22.8246	23.3434	23.5548	24.3623	-1			4	4	4	180670000	29	12
P32780	P32780	General transcription factor IIH subunit 1	GTF2H1	0.940238	-2.24571	62.031	6.6237	26.1054	21.1882	22.8452	23.0843	23.8238	21.7647	-1			5	5	5	102600000	31	3
P32969	P32969	60S ribosomal protein L9	RPL9	0.668491	-0.432928	21.863	99.323	29.8639	29.156	30.3749	29.8563	29.6665	29.5943	-1			7	7	7	11463000000	11	152
P33176	P33176	Kinesin-1 heavy chain	KIF5B	0.0955285	0.0436452	109.68	323.31	29.5864	29.5636	29.9647	29.9604	29.6941	29.8521	-1			36	36	28	10384000000	64	420
P33240	P33240	Cleavage stimulation factor subunit 2	CSTF2	0.923246	-1.58966	60.959	1.8665	21.4275	20.6092	23.8396	20.6485	22.5957	21.8362	-1			4	2	2	29222000	25	6
P33316	P33316	Deoxyuridine 5-triphosphate nucleotidohydrolase, mitochondrial	DUT	0.0126449	-0.019001	26.563	83.029	27.3256	26.439	27.6916	27.6144	27.0565	27.9633	-1			5	5	5	2045400000	17	87
Q15417	Q15417	Calponin-3	CNN3	1.9451	-0.72891	36.413	39.086	28.1046	27.2896	28.4756	27.6137	28.1838	27.6739	-1	+	BicD2_Trbo_RFP-Trbo	9	9	8	2537200000	18	117
P33991;Q9UJA3	P33991	DNA replication licensing factor MCM4	MCM4	0.100502	-0.104506	96.557	63.681	27.5978	27.2078	28.1099	28.2662	28.1646	28.0849	-1			22	22	22	3342900000	51	126
P33992	P33992	DNA replication licensing factor MCM5	MCM5	0.773108	-0.504812	82.285	29.677	27.2552	26.5859	27.8434	27.339	27.649	27.3083	-1			16	16	16	2245200000	47	99
O14936	O14936	Peripheral plasma membrane protein CASK	CASK	2.49484	-0.730759	105.12	100.04	27.739	27.0806	27.899	27.2678	27.8039	26.9013	-1	+	BicD2_Trbo_RFP-Trbo	14	14	14	2178700000	56	103
P34897	P34897	Serine hydroxymethyltransferase, mitochondrial	SHMT2	0.31044	-0.345256	55.992	135.14	29.2592	28.72	30.2743	29.8802	29.639	29.5364	-1			22	22	21	10603000000	33	306
P34932	P34932	Heat shock 70 kDa protein 4	HSPA4	0.444333	-0.408642	94.33	146.32	29.3811	28.6221	30.0624	29.7318	29.6755	29.5392	-1			28	28	26	9440400000	57	329
P34949	P34949	Mannose-6-phosphate isomerase	MPI	0.0404057	0.0670738	46.655	7.1329	24.9667	24.5554	26.0595	25.8713	24.7771	25.5777	-1			5	5	5	591540000	17	19
P35080	P35080	Profilin-2	PFN2	0.230073	-0.236951	15.046	17.115	24.8952	24.7858	25.7521	25.6126	25.0763	24.6144	-1			3	3	3	454360000	8	20
Q5JTH9	Q5JTH9	RRP12-like protein	RRP12	2.07756	-0.73182	143.7	11.942	25.947	24.8788	25.8908	25.2033	25.5816	25.1418	-1	+	BicD2_Trbo_RFP-Trbo	11	10	10	583550000	73	26
P35222	P35222	Catenin beta-1	CTNNB1	0.0397032	0.0796363	85.496	12.758	23.4164	24.4606	24.2714	24.0272	25.5556	24.9945	-1			8	4	4	352360000	42	14
P35232	P35232	Prohibitin	PHB	0.743427	-0.600051	29.804	121.83	29.4541	28.4985	30.1137	29.4727	29.5858	29.3823	-1			14	14	14	9662100000	18	196
P35237	P35237	Serpin B6	SERPINB6	0.0460621	-0.058665	42.621	2.5793	21.704	22.37	21.7333	21.9492	21.9934	20.9354	-1			3	3	3	88381000	24	3
P35240	P35240	Merlin	NF2	1.29254	-2.07915	69.689	6.3415	26.2994	23.5135	23.9568	23.1259	26.0627	23.442	-1			7	7	6	427750000	38	12
P35241	P35241	Radixin	RDX	0.550426	-0.5682	68.563	17.3	24.8698	24.8701	26.3754	25.3351	25.6393	24.9747	-1			14	7	7	535260000	39	30
P35244	P35244	Replication protein A 14 kDa subunit	RPA3	1.07032	-1.22017	13.569	9.9457	26.5059	24.5852	26.4165	25.1281	26.8044	26.353	-1			4	4	4	907900000	8	42
P35249	P35249	Replication factor C subunit 4	RFC4	1.21744	-1.39925	39.681	6.4963	25.4356	23.2988	24.9515	23.5156	23.6804	23.0553	-1			4	4	4	159280000	27	6
P35250	P35250	Replication factor C subunit 2	RFC2	0.637823	-1.37304	39.157	4.8749	24.8733	22.1245	25.6287	25.2598	25.4867	24.4853	-1			5	5	5	312310000	25	9
P35251	P35251	Replication factor C subunit 1	RFC1	0.734213	-0.809526	128.25	3.1613	22.5678	22.7832	23.8315	22.962	23.8031	22.0286	-1			3	3	3	62436000	65	3
P35268	P35268	60S ribosomal protein L22	RPL22	1.17829	-0.655008	14.787	77.164	29.4564	28.5028	29.6887	29.3582	29.7035	29.0225	-1			4	4	4	7517800000	6	98
Q9UGV2	Q9UGV2	Protein NDRG3	NDRG3	3.12305	-0.732246	41.408	21.365	27.2513	26.3785	27.2238	26.4133	27.0933	26.5799	-1	+	BicD2_Trbo_RFP-Trbo	7	7	7	1235200000	16	43
P35520	P35520	Cystathionine beta-synthase	CBS	0.330907	-0.520762	60.586	28.905	26.2663	24.981	26.9938	25.6106	25.176	26.2822	-1			9	9	9	924510000	29	37
Q15029	Q15029	116 kDa U5 small nuclear ribonucleoprotein component	EFTUD2	1.3372	-0.737002	109.43	149.6	29.3664	28.7445	30.0786	29.2047	29.8771	29.1619	-1	+	BicD2_Trbo_RFP-Trbo	35	34	34	7868600000	56	318
P62244	P62244	40S ribosomal protein S15a	RPS15A	1.42528	-0.737522	14.839	136.35	30.297	29.2995	30.5513	29.9766	30.1075	29.4671	-1	+	BicD2_Trbo_RFP-Trbo	6	6	6	12359000000	11	137
P35606	P35606	Coatomer subunit beta	COPB2	0.295617	-0.279844	102.49	68.652	27.6016	27.0735	28.3791	28.0895	27.6896	27.6678	-1			18	18	18	2811800000	51	123
P46781	P46781	40S ribosomal protein S9	RPS9	1.82469	-0.73999	22.591	50.8	31.2051	30.2327	31.4517	30.7187	31.0738	30.5592	-1	+	BicD2_Trbo_RFP-Trbo	12	12	12	22726000000	14	187
P35613	P35613	Basigin	BSG	0.53019	-1.2629	42.2	7.9252	26.4959	23.6872	27.533	25.9525	26.4361	27.0365	-1			4	4	4	1097200000	16	20
P35637	P35637	RNA-binding protein FUS	FUS	0.569077	-0.447551	53.425	82.283	28.2371	27.1902	27.7496	28.2002	28.3853	27.6389	-1			5	5	3	3067900000	17	77
P14866	P14866	Heterogeneous nuclear ribonucleoprotein L	HNRNPL	1.77404	-0.742998	64.132	82.951	28.3466	27.6322	28.8337	27.9929	28.6753	28.0016	-1	+	BicD2_Trbo_RFP-Trbo	17	17	16	3736800000	24	137
P35659	P35659	Protein DEK	DEK	0.310155	-0.389259	42.674	7.0417	24.12	24.4377	25.7636	24.9346	24.9559	24.2994	-1			5	5	5	411480000	24	27
P35749	P35749	Myosin-11	MYH11	0.773166	1.87114	227.34	2.7867	22.4884	25.7347	22.0267	22.3329	23.1893	25.2502	-1			28	3	3	185640000	124	3
P35998	P35998	26S protease regulatory subunit 7	PSMC2	0.66182	-0.710843	48.633	106.02	28.3635	27.305	29.296	28.6332	28.4392	28.028	-1			19	19	19	4260700000	31	200
O75970	O75970	Multiple PDZ domain protein	MPDZ	1.9327	-0.747317	221.62	3.0964	24.5726	24.1618	24.5655	23.6454	24.5711	23.66	-1	+	BicD2_Trbo_RFP-Trbo	3	3	3	214770000	99	2
P36405	P36405	ADP-ribosylation factor-like protein 3	ARL3	0.66543	-0.9544	20.455	15.172	25.4524	23.8454	26.4541	25.5073	25.9758	25.6664	-1			6	6	6	632390000	12	26
P36542	P36542	ATP synthase subunit gamma, mitochondrial	ATP5C1	0.982161	-0.340777	32.996	44.549	28.8861	28.4715	29.1545	28.9558	29.034	28.6249	-1			8	8	8	5982800000	17	148
P36543	P36543	V-type proton ATPase subunit E 1	ATP6V1E1	0.375498	0.479448	26.145	3.0187	24.9767	25.1325	25.7996	25.4541	24.0212	25.6492	-1			4	4	4	547960000	16	4
P36551	P36551	Oxygen-dependent coproporphyrinogen-III oxidase, mitochondrial	CPOX	0.0453361	0.117163	50.151	2.9297	24.6005	23.7004	25.7333	25.167	23.1197	24.9376	-1			4	4	4	348110000	30	12
O15145	O15145	Actin-related protein 2/3 complex subunit 3	ARPC3	1.46292	-0.74743	20.546	5.3939	24.423	23.5612	24.9425	24.1745	24.6034	23.991	-1	+	BicD2_Trbo_RFP-Trbo	1	1	1	241550000	12	23
P36639	P36639	7,8-dihydro-8-oxoguanine triphosphatase	NUDT1	1.19851	-0.647896	17.951	2.4654	23.1022	22.3754	23.6617	22.9105	23.4624	22.9967	-1			2	2	2	106860000	9	3
P36776	P36776	Lon protease homolog, mitochondrial	LONP1	0.103957	0.178663	106.49	18.313	25.7728	25.0718	26.4147	27.0007	25.521	26.172	-1			10	10	10	874640000	51	64
P36871	P36871	Phosphoglucomutase-1	PGM1	0.505846	-0.959497	61.448	4.894	23.0274	21.724	24.7819	22.9171	23.6983	23.9881	-1			3	3	3	156040000	37	10
P36873	P36873	Serine/threonine-protein phosphatase PP1-gamma catalytic subunit	PPP1CC	0.32327	-0.449577	36.983	5.9519	24.8346	25.2152	26.4489	25.1869	26.3544	25.8869	-1			14	2	2	596660000	19	16
Q99959	Q99959	Plakophilin-2	PKP2	1.55888	-0.751659	97.414	60.055	27.1734	26.4669	27.5142	26.9525	27.2781	26.2913	-1	+	BicD2_Trbo_RFP-Trbo	16	16	16	1644500000	55	91
P36957	P36957	Dihydrolipoyllysine-residue succinyltransferase component of 2-oxoglutarate dehydrogenase complex, mitochondrial	DLST	0.878065	-1.52382	48.755	12.604	26.8658	23.8116	25.1713	25.735	26.9841	24.9032	-1			6	6	6	581720000	23	20
P50914	P50914	60S ribosomal protein L14	RPL14	1.71339	-0.753238	23.432	45.607	29.82	28.836	30.0767	29.434	29.7522	29.1192	-1	+	BicD2_Trbo_RFP-Trbo	4	4	4	8972500000	12	121
P37108	P37108	Signal recognition particle 14 kDa protein	SRP14	0.138073	-0.205545	14.57	50.52	27.4525	26.7394	27.7223	27.0336	25.9782	26.7634	-1			4	4	4	1576200000	8	42
P37198	P37198	Nuclear pore glycoprotein p62	NUP62	0.664045	0.386568	53.254	100.81	28.2593	28.6415	27.9693	28.314	28.5699	29.0026	-1			8	8	8	3887600000	13	124
P37268	P37268	Squalene synthase	FDFT1	0.288345	-0.876008	48.115	4.3686	23.8415	19.9533	21.5445	22.8323	23.1911	23.1635	-1			5	5	5	119790000	22	5
Q02878	Q02878	60S ribosomal protein L6	RPL6	1.82041	-0.756289	32.728	197.09	30.7101	29.9646	31.1418	30.4043	30.839	30.0532	-1	+	BicD2_Trbo_RFP-Trbo	11	11	11	18543000000	19	279
P37837	P37837	Transaldolase	TALDO1	0.588161	-0.725905	37.54	29.908	27.4901	26.3344	28.3419	28.042	27.9442	27.2221	-1			9	9	9	2718800000	23	95
Q92974	Q92974	Rho guanine nucleotide exchange factor 2	ARHGEF2	1.67767	-0.760698	111.54	21.915	26.2635	25.7814	26.7023	25.9877	26.9354	25.8498	-1	+	BicD2_Trbo_RFP-Trbo	11	11	11	918480000	65	38
P38117	P38117	Electron transfer flavoprotein subunit beta	ETFB	0.0721059	0.0777645	27.843	27.746	26.7603	26.2329	27.0361	27.447	26.835	27.1848	-1			11	11	11	1574900000	15	95
Q9UKS6	Q9UKS6	Protein kinase C and casein kinase substrate in neurons protein 3	PACSIN3	1.46035	-0.761333	48.486	7.615	25.5475	24.6516	24.929	24.628	25.2372	24.1501	-1	+	BicD2_Trbo_RFP-Trbo	5	5	5	422550000	27	24
P38398	P38398	Breast cancer type 1 susceptibility protein	BRCA1	1.018	-0.253074	207.72	15.141	25.3957	25.2729	25.2538	24.9093	25.2964	25.0044	-1			7	7	7	405450000	101	13
Q99613;B5ME19	Q99613;B5ME19	Eukaryotic translation initiation factor 3 subunit C;Eukaryotic translation initiation factor 3 subunit C-like protein	EIF3C;EIF3CL	2.20649	-0.762945	105.34	323.31	30.7839	30.0289	31.0552	30.4109	31.0694	30.1799	-1	+	BicD2_Trbo_RFP-Trbo	28	28	28	16838000000	44	431
P38606	P38606	V-type proton ATPase catalytic subunit A	ATP6V1A	0.111846	-0.179626	68.303	42.258	27.2321	26.2978	27.996	28.051	27.229	27.5694	-1			18	18	18	2035000000	38	82
P38646	P38646	Stress-70 protein, mitochondrial	HSPA9	0.498097	-0.281241	73.68	323.31	31.0648	30.5965	31.5486	31.2529	31.1195	31.0398	-1			30	29	29	27492000000	43	551
P38919	P38919	Eukaryotic initiation factor 4A-III;Eukaryotic initiation factor 4A-III, N-terminally processed	EIF4A3	0.854272	-0.554211	46.871	30.761	27.8942	27.29	28.5165	28.1158	28.3277	27.6699	-1			16	15	15	2804400000	25	122
P39019	P39019	40S ribosomal protein S19	RPS19	0.650459	-0.580041	16.06	34.3	28.732	27.8456	29.4628	28.9835	29.0911	28.7166	-1			7	7	7	6043400000	12	100
Q14195;Q14117	Q14195	Dihydropyrimidinase-related protein 3	DPYSL3	2.51843	-0.763013	61.963	210.68	30.701	29.6839	30.7234	29.9929	30.5512	30.0097	-1	+	BicD2_Trbo_RFP-Trbo	22	19	18	13084000000	32	335
P39656	P39656	Dolichyl-diphosphooligosaccharide--protein glycosyltransferase 48 kDa subunit	DDOST	0.232347	-0.308308	50.8	57.711	27.2148	26.6415	28.2986	28.0033	27.7887	27.7323	-1			11	11	11	2705700000	24	132
P39687;O43423;O95626	P39687	Acidic leucine-rich nuclear phosphoprotein 32 family member A	ANP32A	0.262728	-0.238684	28.585	136.86	28.8028	28.1909	29.0405	29.3935	29.1089	28.6517	-1			6	6	4	6138400000	11	118
P39748	P39748	Flap endonuclease 1	FEN1	0.0732106	-0.13179	42.592	40.423	26.5521	25.4369	26.9209	27.5303	26.8131	26.9237	-1			8	8	8	1442100000	24	51
P40222	P40222	Alpha-taxilin	TXLNA	0.952244	-1.33427	61.89	50.928	28.013	26.9432	29.1904	26.7321	28.9485	28.4738	-1			15	15	15	3743100000	32	90
P40227;Q92526	P40227	T-complex protein 1 subunit zeta	CCT6A	0.467785	-0.405383	58.024	194.76	30.0398	29.0743	30.4349	30.2024	30.0603	30.0422	-1			23	23	23	12277000000	29	282
Q9UHX1	Q9UHX1	Poly(U)-binding-splicing factor PUF60	PUF60	1.52329	-0.763348	59.875	33.991	26.8523	26.4869	27.5297	26.2372	26.9032	26.2711	-1	+	BicD2_Trbo_RFP-Trbo	10	10	10	1287400000	28	50
P40616	P40616	ADP-ribosylation factor-like protein 1	ARL1	0.960713	-0.487427	20.417	9.9692	27.1029	26.2648	27.3103	26.7971	26.6964	26.5853	-1			5	5	5	1460200000	10	48
P40938	P40938	Replication factor C subunit 3	RFC3	2.49709	-0.765494	40.556	7.4037	25.8912	24.9001	25.7766	25.0986	25.9183	25.2909	-1	+	BicD2_Trbo_RFP-Trbo	3	3	3	570030000	27	19
P40763	P40763	Signal transducer and activator of transcription 3	STAT3	1.28606	-0.603113	88.067	103.07	28.4982	27.6179	28.6714	28.3225	28.4267	27.8466	-1			17	17	17	3691900000	45	142
P40855	P40855	Peroxisomal biogenesis factor 19	PEX19	1.0331	-0.55961	32.806	1.5804	23.8315	23.1393	24.1298	23.7639	23.6956	23.075	-1			2	2	2	142220000	18	4
P40925	P40925	Malate dehydrogenase, cytoplasmic	MDH1	1.09168	-0.652516	36.426	52.957	28.0163	27.274	28.597	27.9404	27.9967	27.438	-1			9	9	9	3276100000	22	123
P40926	P40926	Malate dehydrogenase, mitochondrial	MDH2	0.57446	-0.555293	35.503	224.22	30.0109	29.0366	30.7274	30.2395	30.2744	30.0707	-1			15	15	15	14556000000	24	260
P40937	P40937	Replication factor C subunit 5	RFC5	0.669471	-0.973978	38.496	7.0283	23.3793	22.8077	24.9929	23.3121	24.8723	24.2027	-1			5	5	5	221310000	29	6
Q9Y2A7	Q9Y2A7	Nck-associated protein 1	NCKAP1	1.83117	-0.765532	128.79	21.669	27.4783	26.6536	26.9562	26.2823	27.2829	26.4848	-1	+	BicD2_Trbo_RFP-Trbo	15	15	15	1144800000	63	51
P40939	P40939	Trifunctional enzyme subunit alpha, mitochondrial;Long-chain enoyl-CoA hydratase;Long chain 3-hydroxyacyl-CoA dehydrogenase	HADHA	0.454702	-0.615665	82.999	79.768	26.863	25.9824	28.1915	27.3733	27.3271	27.179	-1			17	17	17	2133900000	44	105
O15511	O15511	Actin-related protein 2/3 complex subunit 5	ARPC5	1.72541	-0.765691	16.32	3.2472	25.2329	24.0452	25.221	24.6927	25.1562	24.5751	-1	+	BicD2_Trbo_RFP-Trbo	2	2	2	361370000	12	23
Q8NEB9	Q8NEB9	Phosphatidylinositol 3-kinase catalytic subunit type 3	PIK3C3	2.25378	-0.766582	101.55	11.425	27.0023	26.007	26.6209	25.8629	26.6393	26.0929	-1	+	BicD2_Trbo_RFP-Trbo	7	7	7	736940000	55	39
P41214	P41214	Eukaryotic translation initiation factor 2D	EIF2D	0.0942786	-0.162384	64.706	2.0764	22.2951	21.754	21.1019	22.5633	22.8597	21.4523	-1			2	2	2	35650000	33	2
P41223	P41223	Protein BUD31 homolog	BUD31	0.410288	0.65553	17	1.7258	22.2334	21.6466	22.6179	23.009	21.0856	23.2479	-1			3	3	3	72417000	9	3
P41227;Q9BSU3	P41227	N-alpha-acetyltransferase 10	NAA10	0.387131	-0.467781	26.458	24.66	26.0857	25.5757	27.2957	26.8573	26.6549	26.1999	-1			6	6	6	1191800000	16	40
Q6NXS1;P41236	Q6NXS1;P41236	Protein phosphatase inhibitor 2-like protein 3;Protein phosphatase inhibitor 2	PPP1R2P3;PPP1R2	1.18066	-1.34055	23.106	6.7834	26.1805	24.3828	26.211	24.6134	24.6726	24.0464	-1			4	4	4	376480000	10	23
P41240	P41240	Tyrosine-protein kinase CSK	CSK	1.0997	-0.882583	50.704	14.846	26.557	25.0279	26.7595	26.2788	26.4041	25.7661	-1			8	8	8	926890000	29	60
P41250	P41250	Glycine--tRNA ligase	GARS	0.0750996	-0.133764	83.165	47.769	27.0331	25.8699	27.5744	27.7824	26.9101	27.464	-1			14	14	14	1882600000	51	93
P41252	P41252	Isoleucine--tRNA ligase, cytoplasmic	IARS	0.126291	0.156317	144.5	156.42	28.7127	28.4601	29.4754	29.8017	28.9047	29.2999	-1			36	36	36	7457800000	65	308
P41567	P41567	Eukaryotic translation initiation factor 1	EIF1	0.477236	-0.725056	12.732	41.179	26.6291	25.4252	27.8424	27.2155	27.2983	26.9539	-1			5	5	2	1685600000	5	52
O43166	O43166	Signal-induced proliferation-associated 1-like protein 1	SIPA1L1	1.5978	-0.770227	200.03	1.7423	25.0986	24.3757	24.6722	24.2223	24.9027	23.7648	-1	+	BicD2_Trbo_RFP-Trbo	1	1	1	360550000	110	2
P42025	P42025	Beta-centractin	ACTR1B	0.310685	0.896847	42.293	10.129	21.2125	23.4735	22.4415	21.9982	24.0508	24.9238	-1			8	4	4	179030000	23	18
P42126	P42126	Enoyl-CoA delta isomerase 1, mitochondrial	ECI1	0.362989	0.470159	32.816	4.3088	23.1815	23.9029	22.1382	23.5757	23.3962	22.6479	-1			3	3	3	148360000	14	12
P42166	P42166	Lamina-associated polypeptide 2, isoform alpha;Thymopoietin;Thymopentin	TMPO	1.22249	-0.79423	75.491	323.31	30.1375	29.2452	30.834	29.6007	30.2491	29.992	-1			25	25	16	15530000000	37	369
O43432	O43432	Eukaryotic translation initiation factor 4 gamma 3	EIF4G3	1.96072	-0.771648	176.65	73.627	28.3534	27.895	28.8472	27.8738	28.498	27.6148	-1	+	BicD2_Trbo_RFP-Trbo	32	26	26	3044000000	97	145
P42285	P42285	Superkiller viralicidic activity 2-like 2	SKIV2L2	0.634829	-0.508406	117.8	11.864	25.7443	25.0063	26.2983	26.1195	26.0627	25.4544	-1			8	8	8	692800000	59	35
Q7Z406	Q7Z406	Myosin-14	MYH14	2.67755	-0.773951	227.87	323.31	31.7597	30.8336	31.6697	31.0782	31.5707	30.7665	-1	+	BicD2_Trbo_RFP-Trbo	92	78	78	55905000000	125	1055
P46778	P46778	60S ribosomal protein L21	RPL21	1.34058	-0.777754	18.565	91.836	29.662	28.6197	30.1339	29.3098	29.7868	29.32	-1	+	BicD2_Trbo_RFP-Trbo	7	7	7	8692200000	9	118
P42574	P42574	Caspase-3;Caspase-3 subunit p17;Caspase-3 subunit p12	CASP3	1.23165	-1.96074	31.608	10.59	26.1736	25.8729	26.2349	24.0239	27.6002	24.2297	-1			5	5	5	801230000	17	13
P42677	P42677	40S ribosomal protein S27	RPS27	0.35936	-0.235008	9.461	20.085	28.5889	28.8288	29.5021	28.6671	28.8974	28.7874	-1			5	5	1	5829200000	5	83
P57721	P57721	Poly(rC)-binding protein 3	PCBP3	1.73306	-0.780502	39.465	2.3106	25.867	24.7805	26.0945	25.2625	25.8006	25.3774	-1	+	BicD2_Trbo_RFP-Trbo	6	1	1	521650000	17	26
P42704	P42704	Leucine-rich PPR motif-containing protein, mitochondrial	LRPPRC	0.233009	-0.321088	157.9	174.18	29.1054	27.884	29.4199	29.5977	29.2582	29.3386	-1			51	51	51	8385400000	102	360
P42765	P42765	3-ketoacyl-CoA thiolase, mitochondrial	ACAA2	0.649271	1.39388	41.924	20.546	22.9752	24.3045	25.3787	26.5317	24.3464	26.0458	-1			6	6	6	444670000	23	23
P42766	P42766	60S ribosomal protein L35	RPL35	0.581184	-0.417088	14.551	15.754	27.4661	27.0964	28.3095	27.7491	27.9858	27.6646	-1			2	2	2	2262200000	6	24
P42771;P42772	P42771;P42772	Cyclin-dependent kinase inhibitor 2A;Cyclin-dependent kinase 4 inhibitor B	CDKN2A;CDKN2B	0.778488	-0.479919	16.532	17.595	26.5077	25.6204	26.8673	26.3889	26.4122	26.3381	-1			2	2	2	1069100000	9	34
P43034	P43034	Platelet-activating factor acetylhydrolase IB subunit alpha	PAFAH1B1	0.488262	-0.615365	46.637	7.5639	24.3938	22.8283	24.635	24.5487	24.5502	24.3558	-1			5	5	5	300960000	27	11
Q96HC4	Q96HC4	PDZ and LIM domain protein 5	PDLIM5	1.81371	-0.780994	63.944	72.708	28.6779	27.6319	28.9238	28.0609	28.6251	28.1912	-1	+	BicD2_Trbo_RFP-Trbo	17	17	17	3653700000	31	143
P43246	P43246	DNA mismatch repair protein Msh2	MSH2	0.371056	-0.423173	104.74	17.296	26.2046	25.8288	27.1922	27.0793	27.0099	26.2291	-1			13	13	13	1230300000	51	53
Q9BZL1	Q9BZL1	Ubiquitin-like protein 5	UBL5	1.34806	-0.781614	8.5468	1.9907	23.1117	21.9747	23.466	22.4457	22.887	22.6996	-1	+	BicD2_Trbo_RFP-Trbo	2	2	2	69497000	5	4
P43487	P43487	Ran-specific GTPase-activating protein	RANBP1	0.927017	-1.01861	23.31	165.86	29.128	28.4476	30.5345	29.4283	30.24	28.9708	-1			5	5	5	10686000000	9	120
P43490	P43490	Nicotinamide phosphoribosyltransferase	NAMPT	0.579534	-0.611087	55.52	57.373	27.7129	26.6721	28.4971	27.695	27.2472	27.2568	-1			16	16	16	2373200000	29	91
P43686	P43686	26S protease regulatory subunit 6B	PSMC4	0.881084	-0.796115	47.366	87.996	28.3132	27.2368	29.1448	28.3967	28.5014	27.9375	-1			15	15	15	3870900000	22	152
P43897	P43897	Elongation factor Ts, mitochondrial	TSFM	0.0552547	-0.143768	35.39	9.7662	23.5714	23.9882	26.3357	25.3784	24.7887	24.8979	-1			6	6	6	463660000	20	26
P45880	P45880	Voltage-dependent anion-selective channel protein 2	VDAC2	0.821408	-0.521056	31.566	218.85	29.2652	28.4837	29.775	29.2893	29.49	29.194	-1			13	13	13	8035100000	16	195
P45974;Q92995	P45974	Ubiquitin carboxyl-terminal hydrolase 5	USP5	0.121741	-0.15139	95.785	25.585	26.4516	26.2854	27.6089	27.3339	26.8779	26.8649	-1			15	15	15	1689200000	43	73
P46013	P46013	Antigen KI-67	MKI67	1.29581	-0.810091	358.69	8.9769	25.8216	25.4456	25.5455	24.6636	25.7216	24.5492	-1			9	9	9	420040000	205	15
P46020	P46020	Phosphorylase b kinase regulatory subunit alpha, skeletal muscle isoform	PHKA1	0.735562	-1.59368	137.31	2.9677	24.3823	22.8886	24.1817	20.8101	24.1281	24.2123	-1			3	3	3	145830000	66	2
P14649	P14649	Myosin light chain 6B	MYL6B	2.82675	-0.784738	22.764	56.468	31.9427	31.1318	31.7004	30.8974	31.7396	30.9992	-1	+	BicD2_Trbo_RFP-Trbo	10	10	8	52075000000	14	185
P46063	P46063	ATP-dependent DNA helicase Q1	RECQL	0.901506	-1.5751	73.457	10.869	25.1533	22.7028	26.244	25.2383	25.7522	24.483	-1			6	6	6	412290000	37	21
P46087	P46087	Probable 28S rRNA (cytosine(4447)-C(5))-methyltransferase	NOP2	0.0202276	-0.0925776	89.301	3.2266	24.3312	21.1176	24.859	25.3236	22.8251	25.2965	-1			1	1	1	162640000	42	8
P46108	P46108	Adapter molecule crk	CRK	0.792109	-1.48246	33.83	3.3902	22.3699	20.389	24.2599	21.7746	22.0068	22.0256	-1			3	3	3	64799000	18	3
O43324	O43324	Eukaryotic translation elongation factor 1 epsilon-1	EEF1E1	3.64821	-0.786949	19.81	24.335	27.0939	26.3498	27.226	26.4084	27.0717	26.2725	-1	+	BicD2_Trbo_RFP-Trbo	8	8	8	1494100000	15	74
P46379	P46379	Large proline-rich protein BAG6	BAG6	0.0212937	-0.039086	119.41	27.645	25.9454	24.572	25.9832	26.1582	24.9337	26.0148	-1			7	7	7	614610000	37	19
P46459	P46459	Vesicle-fusing ATPase	NSF	0.26013	-0.164129	82.593	40.723	26.1099	26.0477	26.7599	26.3491	26.6092	26.5898	-1			13	13	13	1146000000	51	61
Q01968	Q01968	Inositol polyphosphate 5-phosphatase OCRL-1	OCRL	1.7819	-0.78894	104.2	74.981	29.141	28.8389	29.7773	28.6513	29.5716	28.633	-1	+	BicD2_Trbo_RFP-Trbo	25	25	24	5682500000	51	248
Q68EM7	Q68EM7	Rho GTPase-activating protein 17	ARHGAP17	1.30138	-0.792848	95.436	48.62	27.4197	26.3339	27.5439	26.3467	27.2543	27.1588	-1	+	BicD2_Trbo_RFP-Trbo	11	11	11	1238600000	36	74
P46777	P46777	60S ribosomal protein L5	RPL5	0.60889	-0.625703	34.362	72.054	29.281	28.3515	30.1871	29.5645	29.7214	29.3964	-1			13	13	13	9363700000	17	256
A8MPP1;Q92771;Q96FC9	A8MPP1;Q92771;Q96FC9	Putative ATP-dependent RNA helicase DDX11-like protein 8;Putative ATP-dependent RNA helicase DDX12;Probable ATP-dependent RNA helicase DDX11	DDX11L8;DDX12P;DDX11	1.47756	-0.797219	101.81	1.5827	22.19	21.7368	22.3507	21.3503	22.8284	21.8903	-1	+	BicD2_Trbo_RFP-Trbo	1	1	1	32646000	58	2
P52272	P52272	Heterogeneous nuclear ribonucleoprotein M	HNRNPM	1.64007	-0.797384	77.515	191.2	30.9225	29.9492	31.2606	30.6337	31.0318	30.2399	-1	+	BicD2_Trbo_RFP-Trbo	29	29	29	20233000000	52	472
P61247	P61247	40S ribosomal protein S3a	RPS3A	2.09235	-0.798687	29.945	239.13	30.7376	29.7686	31.0096	30.1858	30.6535	30.0503	-1	+	BicD2_Trbo_RFP-Trbo	16	16	16	17348000000	19	276
P46782	P46782	40S ribosomal protein S5;40S ribosomal protein S5, N-terminally processed	RPS5	0.667301	-0.321039	22.876	177.47	30.3027	29.6957	30.5666	30.3784	30.3303	30.1623	-1			12	12	12	14721000000	10	199
P46783;Q9NQ39	P46783;Q9NQ39	40S ribosomal protein S10;Putative 40S ribosomal protein S10-like	RPS10;RPS10P5	1.17108	-0.599086	18.898	116.29	29.1729	28.2294	29.414	28.9372	28.9754	28.5984	-1			9	9	9	6151400000	13	111
P46821	P46821	Microtubule-associated protein 1B;MAP1B heavy chain;MAP1 light chain LC1	MAP1B	0.00510699	-0.0011584	270.63	323.31	33.2766	33.1799	33.2946	33.3909	33.3767	33.3736	-1			84	84	83	101970000000	113	1766
P46926;Q8TDQ7	P46926	Glucosamine-6-phosphate isomerase 1	GNPDA1	0.179392	-0.355827	32.668	14.105	25.5781	24.4015	26.6284	26.4776	26.2034	26.4634	-1			9	9	9	784370000	18	36
Q9NVZ3	Q9NVZ3	Adaptin ear-binding coat-associated protein 2	NECAP2	1.59389	-0.799719	28.338	33.372	26.6058	26.1326	27.0436	26.0041	26.4946	25.6083	-1	+	BicD2_Trbo_RFP-Trbo	5	5	5	800220000	15	34
Q01433	Q01433	AMP deaminase 2	AMPD2	1.55348	-0.801488	100.69	15.742	26.3197	25.148	26.1537	25.1523	26.0559	25.8245	-1	+	BicD2_Trbo_RFP-Trbo	11	11	11	594010000	45	39
P46940	P46940	Ras GTPase-activating-like protein IQGAP1	IQGAP1	0.375689	-0.443312	189.25	96.558	28.2998	27.1565	28.9122	28.2715	27.727	28.1811	-1			34	34	32	4123500000	93	198
P62847	P62847	40S ribosomal protein S24	RPS24	1.59568	-0.805714	15.423	33.589	29.8064	28.8371	30.2315	29.4823	30.0436	29.345	-1	+	BicD2_Trbo_RFP-Trbo	4	4	4	9706700000	7	132
Q13625	Q13625	Apoptosis-stimulating of p53 protein 2	TP53BP2	3.22398	-0.807066	125.61	67.022	27.9631	27.2121	27.9679	26.9953	27.9599	27.2624	-1	+	BicD2_Trbo_RFP-Trbo	17	17	16	2809700000	53	89
Q15424;Q14151	Q15424	Scaffold attachment factor B1	SAFB	1.81337	-0.807388	102.64	44.008	27.3314	26.8092	27.6093	26.9929	27.9221	26.6385	-1	+	BicD2_Trbo_RFP-Trbo	10	10	10	1741500000	49	59
P47897	P47897	Glutamine--tRNA ligase	QARS	0.806906	-0.665782	87.798	75.521	27.6619	26.7822	28.4122	27.7903	28.1259	27.6303	-1			21	21	21	3167400000	50	141
P47914	P47914	60S ribosomal protein L29	RPL29	1.09331	-0.732176	17.752	12.397	27.7936	26.6939	28.2417	27.6358	27.9106	27.4196	-1			2	2	2	2511800000	6	35
P47985;P0C7P4	P47985;P0C7P4	Cytochrome b-c1 complex subunit Rieske, mitochondrial;Cytochrome b-c1 complex subunit 11;Putative cytochrome b-c1 complex subunit Rieske-like protein 1	UQCRFS1;UQCRFS1P1	0.820185	-1.16607	29.668	11.019	26.1613	24.7678	26.4228	25.8875	25.4268	23.8573	-1			5	5	5	606160000	16	34
P48047	P48047	ATP synthase subunit O, mitochondrial	ATP5O	0.433431	-0.353694	23.277	53.74	28.7293	27.7508	28.7561	28.9533	28.6267	28.3469	-1			7	7	7	4394100000	14	141
P48147	P48147	Prolyl endopeptidase	PREP	1.14764	-1.33849	80.699	18.647	26.288	25.2953	27.9862	25.9589	26.6773	25.6818	-1			10	10	10	1017300000	49	52
P48163	P48163	NADP-dependent malic enzyme	ME1	0.541496	-0.68481	64.149	2.8892	23.6541	22.7411	23.9425	22.057	22.9474	23.6915	-1			3	3	3	117960000	30	1
P48444	P48444	Coatomer subunit delta	ARCN1	0.553443	-0.447344	57.21	29.934	26.9228	26.6284	27.9477	27.3235	27.454	27.0304	-1			13	13	13	1808300000	29	87
P48507	P48507	Glutamate--cysteine ligase regulatory subunit	GCLM	0.329905	0.791201	30.727	2.7612	21.3246	23.3044	24.0791	24.797	23.4568	23.1327	-1			2	2	2	153620000	11	5
P48553	P48553	Trafficking protein particle complex subunit 10	TRAPPC10	0.438696	0.747785	142.19	21.967	22.6465	25.3848	24.41	23.985	24.4989	24.4289	-1			6	6	6	356400000	63	18
P48556	P48556	26S proteasome non-ATPase regulatory subunit 8	PSMD8	0.169976	-0.16749	39.611	36.084	26.6438	26.3081	27.3808	26.9728	26.3052	26.5464	-1			9	9	9	1421700000	22	74
P54709	P54709	Sodium/potassium-transporting ATPase subunit beta-3	ATP1B3	1.38848	-0.811419	31.512	9.5331	25.4758	24.913	25.9465	25.4044	26.1989	24.8695	-1	+	BicD2_Trbo_RFP-Trbo	6	6	6	588890000	13	28
P48643	P48643	T-complex protein 1 subunit epsilon	CCT5	0.709532	-0.438457	59.67	316.56	30.981	30.2701	31.4894	31.0055	30.9549	30.8343	-1			30	30	30	24854000000	38	591
P48729;Q8N752	P48729;Q8N752	Casein kinase I isoform alpha;Casein kinase I isoform alpha-like	CSNK1A1;CSNK1A1L	0.556869	-0.353997	38.914	11.643	25.7706	26.0913	26.6583	25.8623	26.4974	25.9107	-1			8	8	8	951130000	21	43
P48735	P48735	Isocitrate dehydrogenase [NADP], mitochondrial	IDH2	0.426414	-0.369691	50.909	1.8847	23.9336	23.2708	24.6029	24.2541	23.8522	23.7548	-1			2	2	2	216850000	29	9
P48739;Q00169	P48739	Phosphatidylinositol transfer protein beta isoform	PITPNB	0.972447	-2.43863	31.54	7.0362	24.8163	21.0315	25.8219	24.8387	24.7762	22.2283	-1			5	5	5	440120000	23	17
P49005	P49005	DNA polymerase delta subunit 2	POLD2	0.637388	-0.793163	51.289	1.8005	22.0295	21.4391	23.6091	22.5662	22.7189	21.9727	-1			1	1	1	56647000	22	0
P49006	P49006	MARCKS-related protein	MARCKSL1	0.599551	-0.593885	19.529	29.893	27.0538	26.0197	27.8386	27.1961	27.0964	26.9913	-1			5	4	4	1613300000	7	45
P49189	P49189	4-trimethylaminobutyraldehyde dehydrogenase	ALDH9A1	0.144831	-0.32227	53.801	18.985	25.4692	24.5057	27.0734	26.7249	25.6687	26.0138	-1			9	9	9	990020000	26	48
P49207	P49207	60S ribosomal protein L34	RPL34	0.821886	-0.674714	13.293	9.8541	27.9308	27.7105	29.2012	27.8454	28.2966	27.8485	-1			5	5	5	3723400000	6	24
P49257	P49257	Protein ERGIC-53	LMAN1	0.411993	0.510806	57.548	17.271	26.7314	26.0871	26.178	27.6488	25.8627	26.5687	-1			6	6	6	1043100000	25	40
P49321	P49321	Nuclear autoantigenic sperm protein	NASP	0.327937	-0.301529	85.237	194.1	28.9517	28.4714	29.7213	29.5269	29.3136	29.0837	-1			22	22	22	7668700000	42	257
P49327	P49327	Fatty acid synthase;[Acyl-carrier-protein] S-acetyltransferase;[Acyl-carrier-protein] S-malonyltransferase;3-oxoacyl-[acyl-carrier-protein] synthase;3-oxoacyl-[acyl-carrier-protein] reductase;3-hydroxyacyl-[acyl-carrier-protein] dehydratase;Enoyl-[acyl-carrier-protein] reductase;Oleoyl-[acyl-carrier-protein] hydrolase	FASN	1.21647	-0.340001	273.42	323.31	33.3911	33.0097	33.6809	33.3382	33.4354	33.1396	-1			101	101	101	126780000000	133	2139
P49366	P49366	Deoxyhypusine synthase	DHPS	0.0642597	-0.0711816	40.97	10.975	23.829	22.9356	23.4532	23.2718	22.6518	23.513	-1			4	4	4	140280000	22	14
P49368	P49368	T-complex protein 1 subunit gamma	CCT3	0.31839	-0.245237	60.533	262.74	30.3274	29.85	30.9424	30.712	30.4423	30.4145	-1			26	26	26	17681000000	37	276
P49411	P49411	Elongation factor Tu, mitochondrial	TUFM	0.059224	-0.0513318	49.541	293.18	29.8921	29.6711	30.5548	30.3954	29.9896	30.216	-1			19	19	19	13351000000	32	384
P49419	P49419	Alpha-aminoadipic semialdehyde dehydrogenase	ALDH7A1	0.253	-0.28081	58.486	38.821	27.2831	26.3076	27.2661	27.8227	27.3556	26.932	-1			12	12	12	2058300000	27	85
P49458	P49458	Signal recognition particle 9 kDa protein	SRP9	0.0707738	-0.0621332	10.112	19.597	26.2224	25.9716	26.8321	26.5418	26.4712	26.8259	-1			3	3	3	1186600000	7	31
P49459	P49459	Ubiquitin-conjugating enzyme E2 A	UBE2A	0.106156	-0.166258	17.315	5.2948	23.8895	23.1648	24.671	24.7271	24.5056	24.6755	-1			2	2	1	267590000	4	11
P49588	P49588	Alanine--tRNA ligase, cytoplasmic	AARS	0.0382971	0.0761051	106.81	61.515	26.9664	27.0441	28.7616	28.4088	27.7366	28.2401	-1			26	26	26	2891300000	56	145
P49589	P49589	Cysteine--tRNA ligase, cytoplasmic	CARS	0.369086	-0.353277	85.472	4.627	23.8934	23.9569	24.9529	24.6437	24.704	23.8899	-1			4	4	4	263190000	42	12
P49591	P49591	Serine--tRNA ligase, cytoplasmic	SARS	0.0332031	-0.0471166	58.777	21.45	26.5441	26.3525	27.62	27.5909	27.1091	27.1885	-1			11	11	11	1703100000	30	77
P49642	P49642	DNA primase small subunit	PRIM1	1.04796	-1.45684	49.901	3.2777	23.1437	21.5119	24.3304	22.7184	24.375	23.2483	-1			2	2	2	119170000	35	6
Q9HB71	Q9HB71	Calcyclin-binding protein	CACYBP	1.56514	-0.811422	26.21	80.263	28.8363	27.842	29.2793	28.4606	29.0512	28.43	-1	+	BicD2_Trbo_RFP-Trbo	7	7	7	4950600000	14	104
Q8TA86	Q8TA86	Retinitis pigmentosa 9 protein	RP9	2.19453	-0.813826	26.106	17.956	27.509	26.8571	27.8493	26.9077	27.4518	26.6039	-1	+	BicD2_Trbo_RFP-Trbo	7	7	7	1340200000	14	36
P49720	P49720	Proteasome subunit beta type-3	PSMB3	0.175143	-0.13763	22.949	53.03	27.0488	26.2307	26.8484	27.22	26.8498	26.8834	-1			5	5	5	1621300000	9	55
P49721	P49721	Proteasome subunit beta type-2	PSMB2	0.763907	-0.655635	22.836	65.501	27.7301	27.1706	28.2376	26.6687	27.7388	27.9002	-1			8	8	8	2579000000	12	101
P49736	P49736	DNA replication licensing factor MCM2	MCM2	0.240127	-0.375579	101.89	35.915	26.8689	25.7245	27.7542	27.4963	26.8461	27.1217	-1			17	17	17	1801700000	49	83
Q15631	Q15631	Translin	TSN	2.19352	-0.815559	26.183	25.671	25.5	24.8384	25.9997	24.9422	25.771	25.0434	-1	+	BicD2_Trbo_RFP-Trbo	4	4	4	528760000	13	17
P49755	P49755	Transmembrane emp24 domain-containing protein 10	TMED10	0.926281	-1.63684	24.976	23.623	28.7762	25.0551	26.7612	26.0495	26.2519	25.7743	-1			4	4	4	1138600000	13	40
P15880	P15880	40S ribosomal protein S2	RPS2	1.64105	-0.817072	31.324	132.45	31.4485	30.6181	31.8176	31.2166	31.6306	30.6108	-1	+	BicD2_Trbo_RFP-Trbo	13	13	13	29034000000	22	275
P49770	P49770	Translation initiation factor eIF-2B subunit beta	EIF2B2	0.15968	0.525123	38.989	2.2412	22.8272	25.4962	23.7956	22.6383	21.8358	21.8995	-1			3	3	3	198690000	19	6
P49773	P49773	Histidine triad nucleotide-binding protein 1	HINT1	0.353441	-0.471624	13.802	48.054	28.7315	27.6067	29.2641	29.4202	28.7664	28.3201	-1			6	6	6	5922300000	8	126
P49790	P49790	Nuclear pore complex protein Nup153	NUP153	0.750798	-1.27384	153.94	4.4508	23.9549	22.2587	25.3334	24.3691	25.1455	23.9845	-1			6	6	6	172200000	61	9
Q16181;Q6ZU15	Q16181	Septin-7	SEPT7	1.55918	-0.81734	50.679	51.201	28.4837	27.6901	28.7304	28.0624	28.3241	27.3337	-1	+	BicD2_Trbo_RFP-Trbo	12	11	11	3324200000	26	101
P36578	P36578	60S ribosomal protein L4	RPL4	2.13272	-0.818251	47.697	151.1	31.5843	30.5878	31.8118	31.0937	31.6157	30.8755	-1	+	BicD2_Trbo_RFP-Trbo	16	16	16	30113000000	30	316
P49815	P49815	Tuberin	TSC2	0.640216	0.529362	200.61	3.431	22.6739	23.847	22.6752	22.6852	23.102	23.507	-1			4	4	4	95182000	101	2
P49840	P49840	Glycogen synthase kinase-3 alpha	GSK3A	0.69743	-1.10358	50.98	7.3193	24.5644	23.3915	24.7904	25.1404	25.4047	22.9169	-1			4	4	4	307620000	20	13
P49841	P49841	Glycogen synthase kinase-3 beta	GSK3B	0.176416	-0.401347	46.744	8.551	23.449	24.2731	24.1093	21.7363	23.9004	24.2453	-1			2	2	2	164710000	24	19
P49903	P49903	Selenide, water dikinase 1	SEPHS1	0.525281	-0.293376	42.91	4.8681	24.8419	24.7785	25.5634	25.1842	25.2565	24.819	-1			3	3	3	406770000	15	15
P49915	P49915	GMP synthase [glutamine-hydrolyzing]	GMPS	0.573099	-0.631516	76.715	50.369	27.7697	26.5256	28.3437	28.0088	28.0977	27.7822	-1			20	20	20	2968100000	43	147
P49916	P49916	DNA ligase 3	LIG3	1.19189	-0.821031	112.91	8.6302	25.4024	24.0493	25.5852	24.5124	24.7235	24.6863	-1			7	7	7	375630000	67	16
P61081	P61081	NEDD8-conjugating enzyme Ubc12	UBE2M	2.2433	-0.819315	20.9	34.945	27.2012	26.2588	27.5025	26.6367	27.222	26.5722	-1	+	BicD2_Trbo_RFP-Trbo	7	7	7	1491500000	11	61
P50213	P50213	Isocitrate dehydrogenase [NAD] subunit alpha, mitochondrial	IDH3A	0.23211	-0.312784	39.591	18.163	26.2261	25.0825	25.1739	25.9164	26.6126	26.0754	-1			8	8	8	782310000	21	43
P50225;P50226;P0DMN0;P0DMM9	P50225;P50226	Sulfotransferase 1A1;Sulfotransferase 1A2	SULT1A1;SULT1A2	1.13162	-1.17728	34.165	31.574	27.3895	25.4095	27.5901	27.0584	27.2027	26.1825	-1			9	9	9	1423400000	21	77
P50395	P50395	Rab GDP dissociation inhibitor beta	GDI2	0.30218	-0.394523	50.663	323.31	29.5234	28.5998	30.3616	30.1382	29.8868	29.8503	-1			23	23	15	11672000000	29	331
P50402	P50402	Emerin	EMD	1.2088	-0.532019	28.994	185.9	28.7134	28.3899	29.0181	28.5178	28.7009	27.9286	-1			14	14	14	5862900000	14	192
P50454	P50454	Serpin H1	SERPINH1	0.460856	-0.433102	46.44	23.851	26.0765	25.9025	27.2336	26.3568	26.8942	26.6458	-1			10	10	10	1165700000	25	42
P50502;Q8IZP2;Q8NFI4	P50502;Q8IZP2;Q8NFI4	Hsc70-interacting protein;Putative protein FAM10A4;Putative protein FAM10A5	ST13;ST13P4;ST13P5	0.787819	-1.02103	41.331	48.932	27.8014	26.0112	28.4109	27.9213	28.1934	27.4101	-1			6	6	6	3284000000	17	72
P50542	P50542	Peroxisomal targeting signal 1 receptor	PEX5	1.19246	-1.03984	70.864	18.983	26.1763	25.6968	25.9423	24.5932	26.741	25.4501	-1			10	10	10	597050000	30	19
P50570;Q05193	P50570	Dynamin-2	DNM2	0.141883	-0.132176	98.063	36.168	26.5444	26.2335	27.1788	27.0946	27.0761	27.0748	-1			15	15	11	1529800000	56	66
P50579	P50579	Methionine aminopeptidase 2	METAP2	0.980466	-1.99419	52.891	9.9465	24.7546	22.6951	26.3719	25.1918	25.4501	22.7071	-1			6	6	6	459390000	30	11
P62314	P62314	Small nuclear ribonucleoprotein Sm D1	SNRPD1	2.67749	-0.820154	13.281	39.192	27.8249	27.0035	28.0721	27.2788	28.0609	27.2152	-1	+	BicD2_Trbo_RFP-Trbo	3	3	3	1913300000	5	48
P50750	P50750	Cyclin-dependent kinase 9	CDK9	0.474194	-0.738961	42.777	3.2284	23.9037	21.5728	22.8678	23.6415	23.1166	22.4569	-1			4	3	3	91423000	22	3
P50851	P50851	Lipopolysaccharide-responsive and beige-like anchor protein	LRBA	0.583029	-0.898167	319.1	2.5089	23.4173	23.1131	23.5895	21.1253	23.0903	23.1642	-1			2	2	2	27136000	156	1
P67936	P67936	Tropomyosin alpha-4 chain	TPM4	1.35912	-0.820297	28.521	142.37	29.2809	28.5335	29.4879	29.0325	29.3377	28.0796	-1	+	BicD2_Trbo_RFP-Trbo	11	11	5	8997700000	21	141
P08708	P08708	40S ribosomal protein S17	RPS17	1.9225	-0.821754	15.55	77.946	30.5422	29.3568	30.5824	29.9817	30.4789	29.7997	-1	+	BicD2_Trbo_RFP-Trbo	6	6	6	12659000000	6	214
P50991	P50991	T-complex protein 1 subunit delta	CCT4	0.729923	-0.519696	57.924	240.33	30.575	29.8329	31.2425	30.6794	30.6545	30.4006	-1			22	22	22	21846000000	37	403
P50995	P50995	Annexin A11	ANXA11	0.416432	-0.687359	54.389	9.9314	25.3662	23.2068	25.2312	25.5596	24.809	24.5778	-1			6	6	6	477850000	22	23
P51003;Q9NRJ5;Q9BWT3	P51003	Poly(A) polymerase alpha	PAPOLA	0.573132	-1.35549	82.842	1.6625	24.0109	20.5503	23.9104	24.1342	23.4756	22.6459	-1			3	3	3	129240000	50	3
P61160	P61160	Actin-related protein 2	ACTR2	1.34679	-0.821917	44.76	30.325	27.0461	26.3694	27.8567	26.4661	27.2588	26.8604	-1	+	BicD2_Trbo_RFP-Trbo	10	10	10	1936200000	21	90
Q13043	Q13043	Serine/threonine-protein kinase 4;Serine/threonine-protein kinase 4 37kDa subunit;Serine/threonine-protein kinase 4 18kDa subunit	STK4	2.622	-0.82373	55.63	35.034	28.1091	27.1827	28.0908	27.4961	28.3336	27.3836	-1	+	BicD2_Trbo_RFP-Trbo	12	12	7	2524900000	29	118
P51148;P61020	P51148	Ras-related protein Rab-5C	RAB5C	0.364449	-0.29244	23.482	55.041	27.4753	26.9159	28.0322	27.885	27.4936	27.3229	-1			8	8	6	2376800000	14	91
P51149	P51149	Ras-related protein Rab-7a	RAB7A	0.868207	-0.606895	23.489	88.71	27.5476	26.6763	28.1225	27.6268	27.7272	27.2736	-1			10	10	10	2396800000	17	97
P51151;Q9NP90	P51151	Ras-related protein Rab-9A	RAB9A	0.592323	-0.968371	22.837	5.4288	24.3861	22.0659	24.8011	24.2641	24.1241	24.0763	-1			4	4	4	287040000	14	11
P51153;P59190	P51153	Ras-related protein Rab-13	RAB13	0.366575	-0.296661	22.774	2.8866	23.5413	22.6166	23.4268	23.7553	23.3281	23.0343	-1			3	2	2	108510000	15	12
P51398	P51398	28S ribosomal protein S29, mitochondrial	DAP3	0.269127	-0.353667	45.566	4.2555	24.4475	24.0082	25.6121	25.2225	24.5207	24.2886	-1			3	3	3	362870000	24	9
P51452	P51452	Dual specificity protein phosphatase 3	DUSP3	0.742672	-1.13907	20.478	1.6118	23.1549	21.9725	23.9371	21.3427	23.1882	23.5478	-1			1	1	1	69514000	10	1
P51532;P51531	P51532;P51531	Transcription activator BRG1;Probable global transcription activator SNF2L2	SMARCA4;SMARCA2	0.0517921	-0.0808366	184.64	4.3145	23.0232	23.6013	24.6059	24.3088	23.9032	23.3797	-1			4	4	4	159840000	74	5
P51570	P51570	Galactokinase	GALK1	0.756133	1.61499	42.272	7.3402	24.5069	24.4319	24.5107	26.1455	21.9649	25.2502	-1			4	4	4	370350000	19	17
P51571	P51571	Translocon-associated protein subunit delta	SSR4	0.49252	-0.501318	18.998	27.03	26.5117	25.4811	27.1548	26.6398	26.1777	26.2194	-1			3	3	3	1083900000	9	44
P51572	P51572	B-cell receptor-associated protein 31	BCAP31	0.165132	-0.116855	27.991	3.5756	25.3041	24.8072	25.4127	25.4731	24.8516	24.9376	-1			2	2	2	317610000	16	15
P51610	P51610	Host cell factor 1;HCF N-terminal chain 1;HCF N-terminal chain 2;HCF N-terminal chain 3;HCF N-terminal chain 4;HCF N-terminal chain 5;HCF N-terminal chain 6;HCF C-terminal chain 1;HCF C-terminal chain 2;HCF C-terminal chain 3;HCF C-terminal chain 4;HCF C-terminal chain 5;HCF C-terminal chain 6	HCFC1	0.814523	-0.600196	208.73	15.583	26.1518	25.6334	27.0329	25.7303	26.2377	26.2581	-1			10	10	10	882380000	66	27
P51617	P51617	Interleukin-1 receptor-associated kinase 1	IRAK1	0.797804	-1.05348	76.536	8.0973	24.5478	23.9996	25.2477	22.8353	25.0144	24.8147	-1			4	4	4	276050000	27	8
P51648;P48448;P30838;P43353	P51648	Fatty aldehyde dehydrogenase	ALDH3A2	0.657275	-1.50835	54.847	7.9443	24.497	21.7165	24.4263	24.6516	26.0343	24.0644	-1			6	6	6	287440000	22	9
P51649	P51649	Succinate-semialdehyde dehydrogenase, mitochondrial	ALDH5A1	0.0838097	0.318795	57.214	2.5445	21.2446	21.2809	24.3719	24.3215	23.2072	24.1776	-1			3	3	3	165100000	26	4
P51659	P51659	Peroxisomal multifunctional enzyme type 2;(3R)-hydroxyacyl-CoA dehydrogenase;Enoyl-CoA hydratase 2	HSD17B4	0.87193	-0.481912	79.685	86.835	27.6589	26.7391	27.5703	27.6181	27.6651	27.0914	-1			16	16	16	2117200000	43	75
P51665	P51665	26S proteasome non-ATPase regulatory subunit 7	PSMD7	0.346277	-0.394779	37.025	33.086	27.4004	26.3189	27.5569	26.8737	26.1594	26.7397	-1			6	6	6	1646200000	15	60
O14654	O14654	Insulin receptor substrate 4	IRS4	3.14777	-0.824083	133.77	323.31	30.9652	30.1315	31.0864	30.3259	30.9514	30.0733	-1	+	BicD2_Trbo_RFP-Trbo	38	38	38	18641000000	59	541
P51808	P51808	Dynein light chain Tctex-type 3	DYNLT3	1.21314	0.907375	13.062	3.3365	22.6905	23.4259	23.2778	23.5055	22.2184	23.9774	-1			2	2	2	230610000	5	2
P62318	P62318	Small nuclear ribonucleoprotein Sm D3	SNRPD3	2.99622	-0.824343	13.916	46.764	28.2195	27.1933	28.1331	27.5013	28.1146	27.2995	-1	+	BicD2_Trbo_RFP-Trbo	4	4	4	2810900000	9	84
P51858	P51858	Hepatoma-derived growth factor	HDGF	0.0535667	-0.0759754	26.788	39.689	26.5616	26.4244	27.3266	27.6903	27.6443	27.1899	-1			9	9	9	1948200000	17	75
P51965	P51965	Ubiquitin-conjugating enzyme E2 E1	UBE2E1	0.0234878	-0.0575447	21.404	8.326	23.3403	24.4578	25.6846	24.3061	25.3707	25.4591	-1			4	4	1	409050000	9	23
P51970	P51970	NADH dehydrogenase [ubiquinone] 1 alpha subcomplex subunit 8	NDUFA8	0.742323	-0.563876	20.105	5.3267	23.7613	23.4107	24.7913	24.0306	24.356	23.7757	-1			1	1	1	191380000	10	13
Q92797	Q92797	Symplekin	SYMPK	1.48089	-0.826991	141.15	35.992	25.8214	24.4718	25.7647	25.3472	25.6332	24.9193	-1	+	BicD2_Trbo_RFP-Trbo	8	8	8	419350000	68	19
P52209	P52209	6-phosphogluconate dehydrogenase, decarboxylating	PGD	0.28322	-0.294433	53.139	97.936	28.8687	28.561	29.9682	29.3541	29.3643	29.4028	-1			17	17	17	8394500000	28	179
Q99426	Q99426	Tubulin-folding cofactor B	TBCB	1.32564	-0.832195	27.325	23.771	26.9739	26.0109	27.6106	26.571	26.805	26.311	-1	+	BicD2_Trbo_RFP-Trbo	5	5	5	1301100000	16	45
P52292	P52292	Importin subunit alpha-1	KPNA2	0.333385	-0.298473	57.861	146.16	28.5703	27.861	29.1784	28.8063	28.5969	28.7829	-1			18	18	18	4908700000	25	189
Q02543	Q02543	60S ribosomal protein L18a	RPL18A	1.84702	-0.835672	20.762	81.009	29.9721	28.8902	30.2058	29.466	29.8192	29.134	-1	+	BicD2_Trbo_RFP-Trbo	8	8	8	9527200000	14	116
P0DP25;P0DP24;P0DP23;P27482;P02585	P0DP25;P0DP24;P0DP23			1.34455	-0.836089	16.837	148.34	31.0588	29.9802	31.5572	30.8115	31.3171	30.6331	-1	+	BicD2_Trbo_RFP-Trbo	8	8	8	27025000000	9	244
Q9BR76	Q9BR76	Coronin-1B	CORO1B	1.89853	-0.837966	54.234	2.824	22.5221	21.8016	22.739	21.7627	23.0051	22.1881	-1	+	BicD2_Trbo_RFP-Trbo	3	3	3	68768000	23	3
P52565	P52565	Rho GDP-dissociation inhibitor 1	ARHGDIA	0.107156	-0.132404	23.207	79.533	28.2802	27.8146	29.1949	28.9056	28.3645	28.7221	-1			7	7	7	4795800000	12	86
O95793	O95793	Double-stranded RNA-binding protein Staufen homolog 1	STAU1	1.37857	-0.840139	63.182	145.46	29.349	28.8598	29.5831	29.0626	29.6946	28.184	-1	+	BicD2_Trbo_RFP-Trbo	18	18	16	5260700000	33	182
P62241	P62241	40S ribosomal protein S8	RPS8	3.21571	-0.841372	24.205	252.04	31.3048	30.2502	31.2529	30.4641	31.1814	30.5006	-1	+	BicD2_Trbo_RFP-Trbo	10	10	10	23205000000	10	208
P52630	P52630	Signal transducer and activator of transcription 2	STAT2	0.996691	-1.31985	97.915	6.4742	25.3186	23.7793	24.2637	22.2778	24.3061	23.8717	-1			5	5	5	209060000	43	6
P52701	P52701	DNA mismatch repair protein Msh6	MSH6	0.0549684	-0.0692393	152.78	21.455	25.5648	25.4634	26.5667	26.4458	26.3303	26.345	-1			16	16	16	929310000	78	36
P52732	P52732	Kinesin-like protein KIF11	KIF11	0.0245967	0.00709597	119.16	129.52	29.0206	28.8185	28.9906	29.0721	28.8192	28.961	-1			36	36	36	5846400000	73	236
P52788	P52788	Spermine synthase	SMS	0.180572	-0.362249	41.268	21.505	26.2006	24.631	26.9466	26.9099	25.745	26.2647	-1			9	9	9	1026200000	23	49
P52815	P52815	39S ribosomal protein L12, mitochondrial	MRPL12	0.343042	-0.363236	21.348	13.072	26.6088	25.8804	27.3806	27.13	26.9465	26.8358	-1			4	4	4	1477800000	10	45
P62263	P62263	40S ribosomal protein S14	RPS14	1.77505	-0.842501	16.273	149.01	30.6739	29.6401	31.0042	30.0821	30.4145	29.8429	-1	+	BicD2_Trbo_RFP-Trbo	5	5	5	15158000000	6	123
P52948	P52948	Nuclear pore complex protein Nup98-Nup96;Nuclear pore complex protein Nup98;Nuclear pore complex protein Nup96	NUP98	0.286603	-0.325703	197.58	33.658	26.6918	26.0571	27.6377	26.7705	26.6439	27.1686	-1			19	19	19	1090900000	77	40
P53004	P53004	Biliverdin reductase A	BLVRA	0.00274634	0.00589561	33.428	7.6812	24.6632	24.5285	26.3818	26.1528	25.435	25.8164	-1			7	7	7	627370000	18	24
P10599	P10599	Thioredoxin	TXN	2.37945	-0.84325	11.737	41.378	31.5031	30.2741	31.2677	30.562	31.2763	30.6813	-1	+	BicD2_Trbo_RFP-Trbo	6	6	6	22257000000	7	250
P53041	P53041	Serine/threonine-protein phosphatase 5	PPP5C	0.115949	0.299102	56.878	9.8282	25.0768	23.5442	25.4036	26.4901	24.6763	26.0196	-1			8	8	8	796650000	29	35
O94788;P47895;P00352	O94788	Retinal dehydrogenase 2	ALDH1A2	1.78332	-0.84328	56.723	82.855	28.401	27.3893	28.7835	27.9827	28.4162	27.6989	-1	+	BicD2_Trbo_RFP-Trbo	15	15	14	2985100000	26	125
P53367	P53367	Arfaptin-1	ARFIP1	1.01369	2.00911	41.738	55.183	22.6431	26.0171	25.6338	26.5067	23.6618	25.4422	-1			5	5	5	627300000	27	22
P53384	P53384	Cytosolic Fe-S cluster assembly factor NUBP1	NUBP1	0.135804	0.165008	34.534	1.6011	22.7194	22.2519	23.2805	23.5008	22.6852	23.4274	-1			1	1	1	90600000	13	2
P53396	P53396	ATP-citrate synthase	ACLY	0.43922	-0.380112	120.84	264.48	30.1492	29.4449	30.7593	30.5531	30.4269	30.1971	-1			41	41	41	16523000000	62	510
P53597	P53597	Succinyl-CoA ligase [ADP/GDP-forming] subunit alpha, mitochondrial	SUCLG1	0.0189009	-0.0236225	36.249	4.6329	24.955	23.9853	24.6928	25.1694	24.1514	24.5735	-1			3	3	3	365800000	14	17
P53618	P53618	Coatomer subunit beta	COPB1	1.01092	-0.52975	107.14	55.535	28.1947	27.4968	28.673	28.0557	28.422	28.148	-1			23	23	23	3660300000	56	181
Q86V48	Q86V48	Leucine zipper protein 1	LUZP1	3.44221	-0.843818	120.27	117.78	29.2503	28.4212	29.462	28.4964	29.2882	28.5515	-1	+	BicD2_Trbo_RFP-Trbo	27	27	27	5430100000	71	237
P53680	P53680	AP-2 complex subunit sigma	AP2S1	1.11603	-0.947711	17.018	21.905	26.7631	26.4562	27.6795	26.1158	27.839	26.8664	-1			5	5	5	1462400000	7	62
P53985	P53985	Monocarboxylate transporter 1	SLC16A1	1.00941	-0.954065	53.944	10.033	26.3887	26.1403	27.5749	26.4612	27.7802	26.2801	-1			3	3	3	1558700000	13	44
P78344	P78344	Eukaryotic translation initiation factor 4 gamma 2	EIF4G2	3.39737	-0.844101	102.36	254.34	30.8082	29.8701	30.8812	30.0799	30.723	29.93	-1	+	BicD2_Trbo_RFP-Trbo	32	32	32	13383000000	56	442
P53992	P53992	Protein transport protein Sec24C	SEC24C	0.94356	-0.576946	118.32	17.136	25.9684	25.0328	26.3782	25.8442	25.9843	25.7231	-1			8	8	8	799550000	45	40
P53999	P53999	Activated RNA polymerase II transcriptional coactivator p15	SUB1	0.671557	-0.541209	14.395	13.445	27.5299	26.8904	28.2515	27.8723	27.7315	27.1265	-1			3	3	3	2348900000	10	49
P54105	P54105	Methylosome subunit pICln	CLNS1A	0.939909	-0.707958	26.215	34.316	27.0838	26.3159	27.9524	27.1008	27.5106	27.0062	-1			5	5	5	1332100000	11	42
P54136	P54136	Arginine--tRNA ligase, cytoplasmic	RARS	0.149189	-0.150349	75.378	58.299	28.8547	28.2284	29.4067	29.179	28.6216	29.0246	-1			23	23	23	6297900000	41	195
P62906	P62906	60S ribosomal protein L10a	RPL10A	1.80899	-0.844524	24.831	166.86	31.1579	30.0812	31.4121	30.733	31.3347	30.5569	-1	+	BicD2_Trbo_RFP-Trbo	10	10	10	23759000000	15	241
P54278;Q13401;Q13670;A4D2B8	P54278;Q13401;Q13670;A4D2B8	Mismatch repair endonuclease PMS2;Putative postmeiotic segregation increased 2-like protein 3;Putative postmeiotic segregation increased 2-like protein 11;Putative postmeiotic segregation increased 2-like protein 1	PMS2;PMS2P3;PMS2P11;PMS2P1	0.214606	0.529965	95.796	1.6891	21.3994	22.4037	23.7204	23.9223	23.7855	24.1691	-1			2	2	2	290380000	50	4
Q9NWH9	Q9NWH9	SAFB-like transcription modulator	SLTM	1.55776	-0.84602	117.15	2.9603	27.3447	26.6078	27.8686	26.8269	27.1466	26.3871	-1	+	BicD2_Trbo_RFP-Trbo	2	2	2	1382300000	51	3
P54577	P54577	Tyrosine--tRNA ligase, cytoplasmic;Tyrosine--tRNA ligase, cytoplasmic, N-terminally processed	YARS	0.351423	-0.166578	59.143	48.172	27.7835	27.4399	28.0906	28.0208	27.9716	27.8852	-1			18	18	18	3087100000	44	134
P54578	P54578	Ubiquitin carboxyl-terminal hydrolase 14	USP14	0.384226	-0.448921	56.068	25.898	26.9784	25.731	27.0025	27.3606	27.2995	26.8419	-1			12	12	12	1440000000	30	48
P54619;Q9UGI9;Q9UGJ0	P54619	5-AMP-activated protein kinase subunit gamma-1	PRKAG1	0.957449	-0.492613	37.579	13.939	26.5369	25.7309	26.5795	25.795	26.334	26.4466	-1			8	8	8	871170000	20	43
P49959	P49959	Double-strand break repair protein MRE11A	MRE11A	3.32447	-0.846828	80.592	131.35	29.7021	28.7416	29.6805	28.7272	29.5717	28.9449	-1	+	BicD2_Trbo_RFP-Trbo	19	19	19	6227000000	39	218
P54725	P54725	UV excision repair protein RAD23 homolog A	RAD23A	0.314162	-0.477724	39.609	4.1566	25.6752	23.8868	25.2981	25.8652	24.8648	24.653	-1			4	4	4	491760000	15	35
P54727	P54727	UV excision repair protein RAD23 homolog B	RAD23B	0.322845	-0.887722	43.171	18.994	25.8988	23.0028	26.5393	26.5283	25.8137	26.0575	-1			5	5	5	810420000	15	27
P54819	P54819	Adenylate kinase 2, mitochondrial;Adenylate kinase 2, mitochondrial, N-terminally processed	AK2	0.180027	-0.239948	26.477	50.216	27.742	26.681	28.2482	28.1096	27.3957	27.8755	-1			10	10	10	2738700000	17	100
P54886	P54886	Delta-1-pyrroline-5-carboxylate synthase;Glutamate 5-kinase;Gamma-glutamyl phosphate reductase	ALDH18A1	0.188033	-0.233277	87.301	60.186	27.2261	26.9155	28.3051	28.124	27.9127	27.7046	-1			17	17	17	2989000000	46	150
P54920	P54920	Alpha-soluble NSF attachment protein	NAPA	0.679258	-0.82066	33.232	6.3638	24.2994	23.0888	25.1567	24.7756	24.6532	23.7829	-1			4	4	4	272510000	21	16
P55010	P55010	Eukaryotic translation initiation factor 5	EIF5	1.22062	-1.13022	49.222	25.438	27.8902	25.6976	26.6438	26.4268	27.394	26.4129	-1			9	9	9	1303400000	26	57
P55011	P55011	Solute carrier family 12 member 2	SLC12A2	0.0193154	0.056441	131.45	2.3941	21.9803	20.7389	23.3279	23.1166	21.2051	22.827	-1			1	1	1	49133000	56	6
P55036	P55036	26S proteasome non-ATPase regulatory subunit 4	PSMD4	0.468863	-0.483357	40.736	34.313	26.4707	26.046	27.6974	26.5134	26.7383	26.8969	-1			7	7	5	1623600000	15	65
P55039	P55039	Developmentally-regulated GTP-binding protein 2	DRG2	0.975773	-0.865763	40.746	6.1499	24.5446	24.5999	25.3949	24.2765	25.936	24.4019	-1			5	5	5	309490000	24	19
P55060	P55060	Exportin-2	CSE1L	0.127861	-0.127806	110.42	323.31	29.6052	29.1835	30.3225	30.1256	29.7629	29.9981	-1			33	33	33	11397000000	56	351
P55072	P55072	Transitional endoplasmic reticulum ATPase	VCP	0.502207	-0.497118	89.321	203.04	30.0748	29.0404	30.6375	30.3811	30.147	29.9464	-1			32	32	32	14122000000	45	420
P55084	P55084	Trifunctional enzyme subunit beta, mitochondrial;3-ketoacyl-CoA thiolase	HADHB	1.05563	-0.416189	51.294	28.513	26.4837	25.6871	26.4588	25.9745	26.2351	26.2674	-1			9	9	9	1047600000	29	66
P52298	P52298	Nuclear cap-binding protein subunit 2	NCBP2	1.9621	-0.848192	18.001	1.6957	26.3518	25.4201	26.7882	25.8213	26.3418	25.6958	-1	+	BicD2_Trbo_RFP-Trbo	4	4	4	671970000	11	2
P62424	P62424	60S ribosomal protein L7a	RPL7A	2.17156	-0.849929	29.995	169.99	31.2134	30.1082	31.3941	30.5662	31.0971	30.4804	-1	+	BicD2_Trbo_RFP-Trbo	11	11	11	22240000000	15	224
P55209	P55209	Nucleosome assembly protein 1-like 1	NAP1L1	0.463251	-0.397248	45.374	97.967	29.6155	29.1821	30.5256	30.0366	30.1312	29.862	-1			11	11	10	11901000000	13	192
P55263	P55263	Adenosine kinase	ADK	0.504821	-0.534911	40.545	3.0547	24.3821	23.8266	25.4837	24.7633	24.3799	24.051	-1			3	3	3	292550000	23	13
Q9HAV0	Q9HAV0	Guanine nucleotide-binding protein subunit beta-4	GNB4	1.37569	-0.850668	37.567	16.302	25.6966	25.4158	26.502	25.2549	26.5536	25.5295	-1	+	BicD2_Trbo_RFP-Trbo	10	3	3	854430000	14	31
P55327	P55327	Tumor protein D52	TPD52	0.310859	-0.338343	24.327	20.584	25.3397	24.4865	25.6178	25.7894	25.0029	24.6696	-1			4	4	4	353770000	10	22
P55735	P55735	Protein SEC13 homolog	SEC13	0.0552797	-0.046718	35.54	68.628	27.5953	27.2305	28.0138	27.8326	27.7216	28.1275	-1			9	9	9	2554600000	13	95
P98175	P98175	RNA-binding protein 10	RBM10	1.32179	-0.851426	103.53	8.5394	24.8042	23.6492	25.3037	24.4106	24.6183	24.1121	-1	+	BicD2_Trbo_RFP-Trbo	4	4	4	254430000	47	8
P55786;A6NEC2	P55786	Puromycin-sensitive aminopeptidase	NPEPPS	0.563034	-0.496157	103.28	93.35	28.4004	27.3648	28.8536	28.5216	28.1705	28.0497	-1			25	25	25	4081300000	53	158
P55809	P55809	Succinyl-CoA:3-ketoacid coenzyme A transferase 1, mitochondrial	OXCT1	0.248397	0.404808	56.157	16.055	24.9516	24.5666	25.5598	26.7132	25.3	25.746	-1			9	9	9	706000000	27	19
P55884	P55884	Eukaryotic translation initiation factor 3 subunit B	EIF3B	0.831645	-0.439898	92.48	151.4	29.5817	28.9549	30.0105	29.4293	29.7881	29.6765	-1			27	27	27	8797100000	37	299
P55957	P55957	BH3-interacting domain death agonist;BH3-interacting domain death agonist p15;BH3-interacting domain death agonist p13;BH3-interacting domain death agonist p11	BID	0.574493	-1.2992	21.994	11.533	23.981	21.6018	25.3997	23.1187	22.4016	23.1642	-1			3	3	3	230680000	10	18
P56134	P56134	ATP synthase subunit f, mitochondrial	ATP5J2	0.0466358	0.0857817	10.918	9.5551	25.9931	26.1994	27.5644	27.4863	27.2308	27.3599	-1			3	3	3	1633700000	4	44
P56182	P56182	Ribosomal RNA processing protein 1 homolog A	RRP1	0.955383	-0.694717	52.839	2.5479	23.3276	23.268	23.2932	22.8688	23.9836	22.3835	-1			2	2	2	95576000	26	3
P56192	P56192	Methionine--tRNA ligase, cytoplasmic	MARS	0.242446	-0.218756	101.11	143.19	28.5963	28.1191	29.2837	29.0854	28.8681	28.8874	-1			23	23	23	5488700000	43	204
P56211	P56211	cAMP-regulated phosphoprotein 19	ARPP19	0.107909	-0.356611	12.323	3.927	24.7686	23.7289	25.1627	24.0079	21.5987	22.7234	-1			3	2	2	204860000	7	14
P56385	P56385	ATP synthase subunit e, mitochondrial	ATP5I	0.601194	1.68867	7.9331	4.3703	23.4749	24.6976	21.3335	25.1465	25.591	25.6213	-1			3	3	3	466340000	5	16
P56537	P56537	Eukaryotic translation initiation factor 6	EIF6	0.280004	-0.318685	26.599	48.941	27.3255	26.071	27.2957	27.6013	27.1798	27.1726	-1			7	7	7	1795200000	10	69
P56545	P56545	C-terminal-binding protein 2	CTBP2	0.782198	-0.565275	48.944	9.6248	24.8739	23.9723	25.4515	24.7841	24.6942	24.5674	-1			5	5	4	361160000	22	13
P62888	P62888	60S ribosomal protein L30	RPL30	1.5768	-0.854249	12.784	121.37	29.4141	28.0713	29.4734	28.8707	29.3453	28.728	-1	+	BicD2_Trbo_RFP-Trbo	5	5	5	6584500000	8	118
P62280	P62280	40S ribosomal protein S11	RPS11	2.90432	-0.854315	18.431	115.64	31.2045	30.0652	31.0707	30.3225	31.0172	30.3418	-1	+	BicD2_Trbo_RFP-Trbo	12	12	12	18793000000	10	216
P57088	P57088	Transmembrane protein 33	TMEM33	0.632649	-1.83909	27.978	7.118	25.1112	24.3046	25.1278	20.8091	25.4345	25.0426	-1			3	3	3	398880000	11	24
P57678	P57678	Gem-associated protein 4	GEMIN4	0.632537	-0.331587	120.04	13.52	26.2242	25.7195	26.6751	26.1875	26.3812	26.3787	-1			12	12	12	933020000	58	33
P17844	P17844	Probable ATP-dependent RNA helicase DDX5	DDX5	1.948	-0.855517	69.147	323.31	30.2349	29.0949	30.381	29.7375	30.2261	29.443	-1	+	BicD2_Trbo_RFP-Trbo	24	16	16	10550000000	35	224
Q9BXS5;Q9Y6Q5	Q9BXS5	AP-1 complex subunit mu-1	AP1M1	2.04068	-0.857582	48.586	19.585	26.0106	25.5729	26.4391	25.4872	26.5982	25.4149	-1	+	BicD2_Trbo_RFP-Trbo	9	9	9	789780000	29	38
Q9NVH1	Q9NVH1	DnaJ homolog subfamily C member 11	DNAJC11	1.36269	-0.861103	63.277	4.4799	24.6388	24.1817	24.8179	23.3229	24.8277	24.1966	-1	+	BicD2_Trbo_RFP-Trbo	4	4	4	260460000	29	6
P57771	P57771	Regulator of G-protein signaling 8	RGS8	0.3171	-0.259225	20.917	1.8962	24.1951	23.5606	24.6436	24.4299	23.8822	23.9527	-1			2	2	2	208650000	12	10
P58107	P58107	Epiplakin	EPPK1	0.418949	0.380647	555.65	145.8	27.5253	27.5565	28.2425	28.2698	27.4699	28.5533	-1			22	22	19	4298100000	301	160
P58511	P58511	Small integral membrane protein 11	SMIM11	0.120434	-0.232826	6.8862	2.6753	22.4429	21.7639	21.5633	23.2057	23.2118	21.5498	-1			2	2	2	73310000	2	5
P58546	P58546	Myotrophin	MTPN	0.459073	-0.625125	12.895	79.878	25.8377	24.9002	26.9587	26.5989	26.3736	25.7955	-1			3	3	3	1119900000	8	29
P58557	P58557	Putative ribonuclease	YBEY	0.187105	-0.280635	19.298	1.9311	21.9466	22.1438	23.2679	23.1044	23.5807	22.7052	-1			1	1	1	85302000	9	3
P59780	P59780	AP-3 complex subunit sigma-2	AP3S2	0.934837	-1.1815	22.017	7.3355	24.449	24.2136	25.6318	22.8331	24.8175	24.3072	-1			4	4	4	190880000	10	7
Q9H0W8	Q9H0W8	Protein SMG9	SMG9	2.41573	-0.861359	57.65	9.4329	25.7568	24.6451	25.4325	24.9132	25.8085	24.8555	-1	+	BicD2_Trbo_RFP-Trbo	5	5	5	368290000	22	23
P60033	P60033	CD81 antigen	CD81	0.166503	0.419695	25.809	2.4676	22.7892	21.2341	22.9642	23.8313	21.2729	23.2199	-1			1	1	1	55192000	8	2
P60059	P60059	Protein transport protein Sec61 subunit gamma	SEC61G	0.322048	-0.153917	7.7412	1.7602	24.3075	23.8477	24.3943	24.3086	23.9302	24.0141	-1			1	1	1	185580000	4	13
P07355;A6NMY6	P07355;A6NMY6	Annexin A2;Putative annexin A2-like protein	ANXA2;ANXA2P2	1.5209	-0.862478	38.604	323.31	29.6599	28.6171	30.1455	29.321	29.948	29.2278	-1	+	BicD2_Trbo_RFP-Trbo	19	19	19	8779600000	24	263
P60228	P60228	Eukaryotic translation initiation factor 3 subunit E	EIF3E	0.734009	-0.667884	52.22	57.768	28.181	27.7507	29.4539	28.0928	28.5951	28.3828	-1			19	19	19	3869100000	32	169
P60468	P60468	Protein transport protein Sec61 subunit beta	SEC61B	0.628977	-1.49562	9.9743	1.827	24.6802	21.2664	24.9234	24.5216	25.0672	24.396	-1			1	1	1	285350000	6	12
P60510	P60510	Serine/threonine-protein phosphatase 4 catalytic subunit	PPP4C	0.398992	-0.542886	35.08	7.4427	25.0909	23.4576	25.0811	24.9711	25.2166	25.3312	-1			4	3	3	348710000	18	14
P60520	P60520	Gamma-aminobutyric acid receptor-associated protein-like 2	GABARAPL2	0.318423	-0.543653	13.667	2.4361	23.5156	22.8059	25.1028	24.4142	23.5942	23.3616	-1			2	2	2	188300000	9	12
P60602	P60602	Reactive oxygen species modulator 1	ROMO1	0.716611	-1.07793	8.1828	2.5833	23.8892	23.2897	24.5887	21.8062	23.8421	23.9903	-1			1	1	1	179100000	4	5
P05387	P05387	60S acidic ribosomal protein P2	RPLP2	1.53541	-0.864284	11.665	158.99	31.3461	30.1097	31.6169	30.9279	31.3897	30.7222	-1	+	BicD2_Trbo_RFP-Trbo	7	7	6	25755000000	5	221
P60709;Q9BYX7	P60709	Actin, cytoplasmic 1;Actin, cytoplasmic 1, N-terminally processed	ACTB	0.740818	-0.502768	41.736	75.583	28.6555	27.9987	29.2595	28.7302	29.1055	28.7833	-1			17	1	1	7370100000	23	124
P60842	P60842	Eukaryotic initiation factor 4A-I	EIF4A1	0.992276	-0.698608	46.153	245.42	31.1156	30.1218	31.6651	31.0048	31.416	30.9743	-1			19	19	11	27721000000	23	492
P60866	P60866	40S ribosomal protein S20	RPS20	1.2379	-0.365737	13.373	44.412	30.0953	29.4098	29.8464	29.8076	30.0396	29.6668	-1			5	5	5	9977200000	6	102
P60891;P21108	P60891	Ribose-phosphate pyrophosphokinase 1	PRPS1	0.882737	-0.382706	34.834	92.109	28.774	28.1504	29.0228	28.6983	28.5911	28.391	-1			9	9	4	5103400000	19	128
P60900	P60900	Proteasome subunit alpha type-6	PSMA6	0.0342216	0.0303879	27.399	19.772	27.3509	26.9203	27.5681	27.6974	26.8923	27.2847	-1			7	7	7	2131600000	13	77
P60953	P60953	Cell division control protein 42 homolog	CDC42	0.971711	-0.628937	21.258	51.752	27.3624	26.2197	27.6249	27.0957	27.1225	26.9077	-1			7	7	6	1913500000	9	83
P60981	P60981	Destrin	DSTN	0.269534	-0.236468	18.506	17.47	26.8563	26.3346	27.4791	27.1638	27.1725	27.2999	-1			5	5	5	1807600000	13	82
P61006;Q92930	P61006;Q92930	Ras-related protein Rab-8A;Ras-related protein Rab-8B	RAB8A;RAB8B	0.160977	-0.356283	23.668	3.4513	21.421	21.8154	23.9527	23.1277	23.0221	22.3838	-1			5	4	4	73191000	17	10
P61011	P61011	Signal recognition particle 54 kDa protein	SRP54	1.1194	-0.573677	55.704	50.065	28.1723	27.5043	28.5425	28.1548	28.2103	27.545	-1			13	13	13	2818700000	36	89
P61019;Q8WUD1	P61019;Q8WUD1	Ras-related protein Rab-2A;Ras-related protein Rab-2B	RAB2A;RAB2B	0.235948	-0.505507	23.545	17.437	24.5777	24.0746	26.5884	25.7534	26.0868	25.9083	-1			9	9	9	815990000	15	30
Q9NUL3	Q9NUL3	Double-stranded RNA-binding protein Staufen homolog 2	STAU2	1.69177	-0.864906	62.608	6.567	25.2277	24.4085	25.876	24.8029	25.3231	24.6206	-1	+	BicD2_Trbo_RFP-Trbo	7	5	5	334710000	39	12
P61026	P61026	Ras-related protein Rab-10	RAB10	0.16817	0.582638	22.541	6.0311	20.9838	23.692	25.0198	24.4978	24.6366	24.1982	-1			4	3	3	316480000	17	14
P61077;P62837;Q9Y2X8;P51668	P61077;P62837	Ubiquitin-conjugating enzyme E2 D3;Ubiquitin-conjugating enzyme E2 D2	UBE2D3;UBE2D2	0.283125	-0.337083	16.687	6.6877	26.4556	25.9685	27.5644	27.1577	26.7137	26.5963	-1			3	3	3	1452900000	5	35
Q96IZ0	Q96IZ0	PRKC apoptosis WT1 regulator protein	PAWR	3.59377	-0.865187	36.567	177.74	28.97	27.9388	28.8898	28.0169	28.7723	28.081	-1	+	BicD2_Trbo_RFP-Trbo	9	9	9	4714900000	14	174
P61086	P61086	Ubiquitin-conjugating enzyme E2 K	UBE2K	0.636631	-0.4785	22.406	22.974	26.3263	25.6145	26.9428	25.9894	26.3024	26.5321	-1			7	7	7	998360000	14	52
P61088;Q5JXB2	P61088;Q5JXB2	Ubiquitin-conjugating enzyme E2 N;Putative ubiquitin-conjugating enzyme E2 N-like	UBE2N;UBE2NL	0.639263	-0.518946	17.138	32.539	28.0197	27.294	28.741	28.2931	28.1239	27.7405	-1			6	6	6	3496000000	11	76
P61106	P61106	Ras-related protein Rab-14	RAB14	0.734198	-0.679841	23.897	6.1407	25.0761	24.5029	25.8883	25.562	25.6746	24.5346	-1			4	4	4	518720000	15	16
P61158	P61158	Actin-related protein 3	ACTR3	0.00573763	0.0118192	47.371	45.926	26.3136	26.1463	27.7507	27.3274	25.8348	26.4608	-1			10	10	10	1626800000	21	68
P62140	P62140	Serine/threonine-protein phosphatase PP1-beta catalytic subunit	PPP1CB	1.97021	-0.865867	37.186	211.93	30.0372	28.9778	30.3244	29.5681	30.11	29.3281	-1	+	BicD2_Trbo_RFP-Trbo	16	16	7	10828000000	19	264
P61163	P61163	Alpha-centractin	ACTR1A	0.104312	-0.138072	42.613	66.225	27.3034	27.2095	28.381	28.4286	28.0205	27.6526	-1			9	9	5	3545300000	23	97
P61201	P61201	COP9 signalosome complex subunit 2	COPS2	0.456503	-0.864727	51.596	5.0493	24.8668	24.6295	24.9222	22.5049	25.1107	25.1711	-1			5	5	5	348360000	26	9
P84077;P61204	P84077;P61204	ADP-ribosylation factor 1;ADP-ribosylation factor 3	ARF1;ARF3	0.432853	-0.353078	20.697	65.675	27.799	27.2266	28.5469	28.086	27.887	27.8611	-1			8	3	3	3010900000	12	91
P61221	P61221	ATP-binding cassette sub-family E member 1	ABCE1	0.468572	-0.703254	67.314	52.136	27.0759	25.6378	27.8028	27.7622	27.4628	26.8317	-1			16	16	16	1806400000	34	104
P61224;A6NIZ1;P62834	P61224;A6NIZ1;P62834	Ras-related protein Rap-1b;Ras-related protein Rap-1b-like protein;Ras-related protein Rap-1A	RAP1B;RAP1A	0.516544	-0.658683	20.825	20.272	27.2207	26.3469	28.4438	27.3846	26.8898	26.8467	-1			6	6	6	1763100000	12	68
Q9BWF3;Q9BQ04	Q9BWF3;Q9BQ04	RNA-binding protein 4;RNA-binding protein 4B	RBM4;RBM4B	1.89237	-0.86657	40.313	25.222	27.0983	25.7183	26.8281	26.0414	26.7474	26.3143	-1	+	BicD2_Trbo_RFP-Trbo	10	10	10	1080600000	22	39
Q9UNX3;P61254	Q9UNX3;P61254	60S ribosomal protein L26-like 1;60S ribosomal protein L26	RPL26L1;RPL26	1.27083	-0.51665	17.256	10.786	28.3997	27.4122	28.1552	28.0144	28.1924	27.7708	-1			4	4	4	3348300000	9	66
P61289	P61289	Proteasome activator complex subunit 3	PSME3	0.666508	-0.623494	29.506	51.227	28.0288	27.1438	28.8868	28.2968	28.2104	27.815	-1			9	9	9	3036900000	17	150
Q9NVN8	Q9NVN8	Guanine nucleotide-binding protein-like 3-like protein	GNL3L	1.91385	-0.867645	65.572	2.2135	24.4532	23.4142	23.8651	23.0744	24.0517	23.2785	-1	+	BicD2_Trbo_RFP-Trbo	3	3	3	140210000	37	4
Q14257	Q14257	Reticulocalbin-2	RCN2	2.28331	-0.870255	36.876	172.69	29.3811	28.2662	29.5007	28.7714	29.2988	28.5322	-1	+	BicD2_Trbo_RFP-Trbo	12	12	12	6598100000	15	168
P61421	P61421	V-type proton ATPase subunit d 1	ATP6V0D1	0.0178192	-0.0415993	40.329	52.578	24.1802	24.4974	26.2739	25.5374	25.7459	26.0403	-1			5	5	5	477170000	17	22
P61457	P61457	Pterin-4-alpha-carbinolamine dehydratase	PCBD1	0.483977	-0.893857	11.999	4.4933	23.6445	22.9037	25.7491	24.1513	24.9818	24.6388	-1			2	2	2	233740000	8	12
P61513;A6NKH3	P61513	60S ribosomal protein L37a	RPL37A	1.19529	-0.918341	10.275	79.256	28.278	26.6737	28.4227	27.8397	28.0941	27.5263	-1			5	5	5	2707900000	6	56
P61604	P61604	10 kDa heat shock protein, mitochondrial	HSPE1	0.712399	-0.471328	10.932	13.952	28.1919	27.4466	28.7189	28.2429	28.0867	27.8941	-1			8	8	8	3631700000	10	97
P61619;Q9H9S3	P61619	Protein transport protein Sec61 subunit alpha isoform 1	SEC61A1	0.234457	0.569855	52.264	5.8718	24.29	24.3842	22.1162	25.0209	25.0831	23.7939	-1			5	5	5	305740000	17	27
P61758	P61758	Prefoldin subunit 3	VBP1	1.19746	-0.922562	22.626	32.888	27.226	26.174	27.7483	27.1241	27.2487	26.1573	-1			8	8	8	1545900000	15	76
P61803	P61803	Dolichyl-diphosphooligosaccharide--protein glycosyltransferase subunit DAD1	DAD1	0.560277	-0.53557	12.497	11.273	24.1391	24.133	25.208	24.0939	25.2524	24.7658	-1			3	3	3	268320000	5	17
Q8N5L8	Q8N5L8	Ribonuclease P protein subunit p25-like protein	RPP25L	1.74171	-0.871234	17.631	2.0526	24.2571	23.0863	24.2273	23.8224	24.4668	23.4288	-1	+	BicD2_Trbo_RFP-Trbo	2	2	2	153220000	9	9
P61960	P61960	Ubiquitin-fold modifier 1	UFM1	1.24057	-2.0882	9.1175	9.5727	25.387	24.2296	24.1465	22.4398	25.4974	22.0969	-1			2	2	2	256670000	5	8
P61962	P61962	DDB1- and CUL4-associated factor 7	DCAF7	1.23007	-0.923306	38.926	24.497	26.4617	25.2847	27.0338	25.5163	26.2224	26.1469	-1			6	6	6	932890000	16	48
P61964	P61964	WD repeat-containing protein 5	WDR5	0.806125	-1.22564	36.588	4.304	25.1504	22.2416	24.422	23.6576	23.2109	23.2072	-1			3	3	3	136400000	22	3
P61966;P56377	P61966;P56377	AP-1 complex subunit sigma-1A;AP-1 complex subunit sigma-2	AP1S1;AP1S2	1.10077	-1.73205	18.733	2.8528	23.4791	20.3369	23.6789	22.2143	23.3483	22.7589	-1			2	2	2	68276000	10	7
P61970	P61970	Nuclear transport factor 2	NUTF2	0.115913	0.21553	14.478	12.935	25.7441	24.941	23.6832	25.6097	25.0733	24.5966	-1			4	4	4	509480000	8	20
P19525	P19525	Interferon-induced, double-stranded RNA-activated protein kinase	EIF2AK2	1.80095	-0.871997	62.094	17.241	26.2532	25.0342	26.4227	25.6602	26.3077	25.6732	-1	+	BicD2_Trbo_RFP-Trbo	7	7	7	750530000	25	49
P61981	P61981	14-3-3 protein gamma;14-3-3 protein gamma, N-terminally processed	YWHAG	0.788692	-0.496009	28.302	151.53	27.8754	26.9784	28.0785	27.8316	27.5843	27.2402	-1			8	5	5	2524300000	18	76
P60660	P60660	Myosin light polypeptide 6	MYL6	4.78742	-0.87232	16.93	323.31	33.0507	32.1447	32.9357	32.1178	32.9945	32.1014	-1	+	BicD2_Trbo_RFP-Trbo	9	7	7	117660000000	11	335
P62081	P62081	40S ribosomal protein S7	RPS7	0.709544	-0.570393	22.127	77.394	29.6386	28.5707	30.1101	29.6546	29.5753	29.3876	-1			8	8	8	9841400000	11	155
Q6P1N0	Q6P1N0	Coiled-coil and C2 domain-containing protein 1A	CC2D1A	3.13938	-0.872519	104.06	68.74	28.7257	27.9121	28.907	28.0594	28.7581	27.8017	-1	+	BicD2_Trbo_RFP-Trbo	19	19	19	3758000000	53	179
O75533	O75533	Splicing factor 3B subunit 1	SF3B1	1.59621	-0.87629	145.83	98.536	28.636	27.6227	29.0982	27.9716	28.8507	28.3616	-1	+	BicD2_Trbo_RFP-Trbo	27	27	27	4015400000	69	147
P62191	P62191	26S protease regulatory subunit 4	PSMC1	1.11669	-0.871847	49.184	45.004	28.3262	26.7095	28.408	27.6688	28.1275	27.8679	-1			10	10	10	2829800000	27	116
P62195	P62195	26S protease regulatory subunit 8	PSMC5	0.798213	-0.419278	45.626	271.71	29.144	28.3016	29.3208	28.9837	29.0928	29.0145	-1			19	19	18	6439900000	28	267
Q9NNW5	Q9NNW5	WD repeat-containing protein 6	WDR6	3.44257	-0.876823	121.72	135.85	28.8764	27.9199	28.9963	28.0331	28.8545	28.1438	-1	+	BicD2_Trbo_RFP-Trbo	30	30	30	5151900000	52	215
Q9BVA0	Q9BVA0	Katanin p80 WD40 repeat-containing subunit B1	KATNB1	1.87614	-0.876886	72.333	17.453	26.5567	26.0062	27.2519	25.944	26.7628	25.9905	-1	+	BicD2_Trbo_RFP-Trbo	11	11	11	849890000	40	38
P26599;O95758	P26599	Polypyrimidine tract-binding protein 1	PTBP1	2.05816	-0.877785	57.221	303.48	30.3935	29.2024	30.4711	29.8233	30.3972	29.6027	-1	+	BicD2_Trbo_RFP-Trbo	17	17	17	11485000000	22	340
P62258	P62258	14-3-3 protein epsilon	YWHAE	0.563758	-0.321583	29.174	318.04	31.917	31.4013	32.3577	32.1149	32.1827	31.9765	-1			18	18	15	54298000000	18	527
Q8IY81	Q8IY81	pre-rRNA processing protein FTSJ3	FTSJ3	1.666	-0.884778	96.557	2.7678	23.2821	22.4022	23.928	22.6561	23.3048	22.8022	-1	+	BicD2_Trbo_RFP-Trbo	2	2	2	87112000	42	4
P08754;P19087;P11488;A8MTJ3	P08754	Guanine nucleotide-binding protein G(k) subunit alpha	GNAI3	3.37287	-0.887341	40.532	323.31	31.0607	30.0041	30.9843	30.0637	30.9343	30.2494	-1	+	BicD2_Trbo_RFP-Trbo	16	16	9	20504000000	17	331
Q08431	Q08431	Lactadherin;Lactadherin short form;Medin	MFGE8	1.79647	-0.887778	43.104	2.1437	22.6201	21.9619	22.4636	21.2262	22.4656	21.6978	-1	+	BicD2_Trbo_RFP-Trbo	1	1	1	49603000	25	1
P62273	P62273	40S ribosomal protein S29	RPS29	1.1551	-0.602101	6.6767	42.217	27.3614	26.539	27.3658	26.4668	27.3192	27.2343	-1			2	2	2	1468300000	4	40
P62277	P62277	40S ribosomal protein S13	RPS13	1.27798	-0.785759	17.222	27.591	30.3356	29.1786	30.688	30.0637	30.2591	29.6833	-1			8	8	8	12594000000	11	135
P04899	P04899	Guanine nucleotide-binding protein G(i) subunit alpha-2	GNAI2	2.26108	-0.888746	40.45	122.72	28.5895	27.9565	28.739	27.767	29.0779	28.0165	-1	+	BicD2_Trbo_RFP-Trbo	16	9	8	4967200000	20	162
P62304	P62304	Small nuclear ribonucleoprotein E	SNRPE	1.12419	-0.94219	10.803	27.651	28.1598	26.9173	28.8972	28.0153	28.2453	27.5432	-1			4	4	4	2749900000	4	103
Q8N6R0	Q8N6R0	Methyltransferase-like protein 13	METTL13	1.45352	-0.890558	78.767	3.5015	23.0754	22.6578	23.4018	22.7455	23.5686	21.9708	-1	+	BicD2_Trbo_RFP-Trbo	3	3	3	73415000	42	3
P62310	P62310	U6 snRNA-associated Sm-like protein LSm3	LSM3	0.740744	-0.617751	11.845	9.7616	25.2371	24.4232	25.941	25.4494	25.8105	25.2627	-1			2	2	2	513870000	4	19
O60237	O60237	Protein phosphatase 1 regulatory subunit 12B	PPP1R12B	1.5806	-0.890601	110.4	6.0865	23.2102	23.0191	23.9033	22.6602	23.7452	22.5075	-1	+	BicD2_Trbo_RFP-Trbo	2	2	2	160580000	54	6
P31943	P31943	Heterogeneous nuclear ribonucleoprotein H;Heterogeneous nuclear ribonucleoprotein H, N-terminally processed	HNRNPH1	1.68544	-0.891179	49.229	323.31	30.9788	29.7905	31.3011	30.5237	31.003	30.295	-1	+	BicD2_Trbo_RFP-Trbo	16	16	8	18013000000	25	329
P07948	P07948	Tyrosine-protein kinase Lyn	LYN	3.35714	-0.89125	58.573	53.692	28.4621	27.5968	28.5515	27.5809	28.6304	27.7926	-1	+	BicD2_Trbo_RFP-Trbo	18	18	15	3794300000	33	135
P62330	P62330	ADP-ribosylation factor 6	ARF6	0.018949	-0.0600567	20.082	2.1213	21.6736	21.4527	24.0724	22.3062	22.254	24.0609	-1			2	2	2	48801000	9	2
P62333	P62333	26S protease regulatory subunit 10B	PSMC6	0.759776	-0.54255	44.172	33.718	26.7565	26.0943	27.4751	26.9698	27.0352	26.575	-1			10	10	10	1511600000	27	58
P62495	P62495	Eukaryotic peptide chain release factor subunit 1	ETF1	1.55658	-0.892474	49.03	122.72	29.3784	28.1367	29.7004	28.9335	29.4639	28.7951	-1	+	BicD2_Trbo_RFP-Trbo	15	15	15	6234500000	27	209
Q9H2M9	Q9H2M9	Rab3 GTPase-activating protein non-catalytic subunit	RAB3GAP2	2.17665	-0.893371	155.98	23.133	27.3108	26.0919	27.2244	26.2324	27.1012	26.632	-1	+	BicD2_Trbo_RFP-Trbo	15	15	15	1201300000	70	48
P62633	P62633	Cellular nucleic acid-binding protein	CNBP	0.497226	0.483425	19.463	19.067	25.3769	26.9967	26.1367	25.9241	25.8556	25.8987	-1			3	3	3	907780000	15	22
P62829	P62829	60S ribosomal protein L23	RPL23	2.5275	-0.895962	14.865	58.444	31.2019	30.0129	31.1807	30.4774	31.1171	30.3215	-1	+	BicD2_Trbo_RFP-Trbo	7	7	7	19556000000	10	273
P62750;REV__Q969S3	P62750	60S ribosomal protein L23a	RPL23A	0.728574	-0.412279	17.695	77.998	29.7416	28.7785	29.7661	29.5671	29.4324	29.3576	-1			8	8	8	8457900000	9	145
Q9UKF6	Q9UKF6	Cleavage and polyadenylation specificity factor subunit 3	CPSF3	2.56916	-0.896318	77.485	24.04	27.772	26.905	27.5886	26.5881	27.4538	26.6324	-1	+	BicD2_Trbo_RFP-Trbo	13	13	13	1492400000	36	60
P62805	P62805	Histone H4	HIST1H4A	0.00885612	0.024238	11.367	46.335	29.6271	31.5178	29.8197	28.7759	30.9979	30.2237	-1			6	6	6	18684000000	6	126
P62820;Q92928	P62820;Q92928	Ras-related protein Rab-1A;Putative Ras-related protein Rab-1C	RAB1A;RAB1C	0.169316	-0.661926	22.677	33.576	24.4793	23.7427	25.0571	25.1129	22.2927	20.9877	-1			5	1	1	363050000	18	12
P62826	P62826	GTP-binding nuclear protein Ran	RAN	0.454014	0.194271	24.423	223.62	30.9693	31.2252	31.5122	31.5251	31.1244	31.4384	-1			10	10	10	31772000000	11	227
Q07020	Q07020	60S ribosomal protein L18	RPL18	3.22448	-0.897835	21.634	66.528	29.8127	28.9589	29.9598	29.1683	30.0099	28.9615	-1	+	BicD2_Trbo_RFP-Trbo	7	7	7	8929600000	9	138
P62841	P62841	40S ribosomal protein S15	RPS15	0.807438	-1.28985	17.04	23.369	27.4778	25.5123	28.4767	27.7046	28.3748	27.2429	-1			5	4	4	2356700000	7	68
Q9HAU0	Q9HAU0	Pleckstrin homology domain-containing family A member 5	PLEKHA5	1.62106	-0.899268	127.46	19.69	27.2429	26.0395	26.705	26.409	27.4807	26.2823	-1	+	BicD2_Trbo_RFP-Trbo	13	13	13	1066000000	67	48
Q13596	Q13596	Sorting nexin-1	SNX1	1.82069	-0.899436	59.069	23.23	26.8093	25.5701	26.4459	25.8791	26.9876	26.0952	-1	+	BicD2_Trbo_RFP-Trbo	12	12	11	763120000	27	38
O43913	O43913	Origin recognition complex subunit 5	ORC5	2.04849	-0.900841	50.282	2.0443	23.1089	21.7368	22.9667	22.2455	22.7236	22.1143	-1	+	BicD2_Trbo_RFP-Trbo	2	2	2	53918000	27	2
P62857	P62857	40S ribosomal protein S28	RPS28	0.15359	0.307946	7.8409	40.218	27.5153	26.748	25.6247	27.7133	27.8448	27.4473	-1			2	2	2	2172400000	3	57
P62861	P62861	40S ribosomal protein S30	FAU	1.13906	-0.542255	6.6478	3.7084	27.4408	26.6269	27.3308	27.2148	27.2226	26.5257	-1			2	2	2	1818200000	3	20
Q9UHD8	Q9UHD8	Septin-9	SEPT9	2.03115	-0.901126	65.401	49.462	28.2025	27.037	28.3228	27.6566	28.3651	27.4935	-1	+	BicD2_Trbo_RFP-Trbo	15	15	15	2647400000	39	113
P62875	P62875	DNA-directed RNA polymerases I, II, and III subunit RPABC5	POLR2L	0.162009	0.634209	7.645	1.9856	21.33	23.8796	25.534	25.4558	25.5037	24.9349	-1			2	2	2	297810000	5	13
Q15051	Q15051	IQ calmodulin-binding motif-containing protein 1	IQCB1	1.72509	-0.904549	68.928	12.373	26.0551	25.4984	25.8753	25.0256	26.011	24.7038	-1	+	BicD2_Trbo_RFP-Trbo	7	7	7	683830000	35	25
Q13813	Q13813	Spectrin alpha chain, non-erythrocytic 1	SPTAN1	2.46854	-0.90476	284.54	229.65	29.1567	28.2832	29.5656	28.5034	29.1932	28.4146	-1	+	BicD2_Trbo_RFP-Trbo	62	62	62	6527600000	190	293
O43491	O43491	Band 4.1-like protein 2	EPB41L2	1.53112	-0.905458	112.59	114.22	28.8135	27.3361	28.3771	28.0974	28.8472	27.8879	-1	+	BicD2_Trbo_RFP-Trbo	24	24	20	3523600000	62	160
Q59GN2;P62891	Q59GN2;P62891	Putative 60S ribosomal protein L39-like 5;60S ribosomal protein L39	RPL39P5;RPL39	1.10198	-0.437248	6.3225	13.581	30.7557	30.305	30.3808	29.8156	30.4082	30.1123	-1			1	1	1	15422000000	1	51
P62899;A6NDB9	P62899	60S ribosomal protein L31	RPL31	0.472671	-0.387829	14.463	40.985	28.7262	27.7814	28.9426	28.9739	28.818	28.5679	-1			7	7	7	5113300000	7	90
Q7Z3B4	Q7Z3B4	Nucleoporin p54	NUP54	1.7625	-0.911563	55.435	23.781	26.7831	26.3377	27.0364	26.2218	27.1422	25.6674	-1	+	BicD2_Trbo_RFP-Trbo	10	10	10	1113300000	28	53
Q6WCQ1	Q6WCQ1	Myosin phosphatase Rho-interacting protein	MPRIP	2.19579	-0.911773	116.53	247.62	30.0392	29.192	30.1441	29.5436	30.4549	29.1672	-1	+	BicD2_Trbo_RFP-Trbo	39	39	39	12497000000	60	474
P13010	P13010	X-ray repair cross-complementing protein 5	XRCC5	1.33317	-0.911786	82.704	283.25	29.9097	28.8425	30.621	29.6341	30.0132	29.3318	-1	+	BicD2_Trbo_RFP-Trbo	28	28	28	12283000000	44	358
P62917	P62917	60S ribosomal protein L8	RPL8	0.812278	-0.651315	28.024	205.38	30.2628	29.1503	30.7209	30.27	30.4768	30.0863	-1			7	7	7	13061000000	14	113
P62937;F5H284	P62937	Peptidyl-prolyl cis-trans isomerase A;Peptidyl-prolyl cis-trans isomerase A, N-terminally processed	PPIA	0.145856	-0.1967	18.012	132.83	31.3563	31.0354	32.4767	32.2845	32.0846	32.0075	-1			12	11	8	52029000000	14	386
P62942	P62942	Peptidyl-prolyl cis-trans isomerase FKBP1A	FKBP1A	0.741234	-0.660246	11.951	31.364	27.0549	26.0269	27.6574	26.5704	26.3738	26.5081	-1			4	4	4	1443600000	3	31
P62979	P62979	Ubiquitin-40S ribosomal protein S27a;Ubiquitin;40S ribosomal protein S27a	RPS27A	0.892022	-0.530858	17.965	137.51	31.6926	30.9601	32.2422	31.6327	31.8958	31.6452	-1			6	6	2	43817000000	11	179
P62993	P62993	Growth factor receptor-bound protein 2	GRB2	1.02048	-0.636115	25.206	12.537	26.1739	25.1067	26.2104	26.107	26.3299	25.5922	-1			7	7	7	781610000	18	44
Q9P2D0	Q9P2D0	Inhibitor of Bruton tyrosine kinase	IBTK	1.32952	-0.91256	150.53	12.619	25.789	24.8648	25.7645	24.8235	26.4268	25.5543	-1	+	BicD2_Trbo_RFP-Trbo	9	9	9	473790000	82	21
P63000;P60763;P15153;P84095;P17081;Q9H4E5	P63000;P60763;P15153	Ras-related C3 botulinum toxin substrate 1;Ras-related C3 botulinum toxin substrate 3;Ras-related C3 botulinum toxin substrate 2	RAC1;RAC3;RAC2	0.564653	-0.835091	21.45	6.1083	25.9546	24.8051	27.0961	26.6431	26.1477	25.245	-1			6	5	5	978170000	9	40
Q9UI30	Q9UI30	Multifunctional methyltransferase subunit TRM112-like protein	TRMT112	1.40299	-0.913017	14.199	16.866	26.658	25.031	26.1739	25.9604	26.4502	25.5517	-1	+	BicD2_Trbo_RFP-Trbo	4	4	4	810420000	9	35
Q15836;P63027;P23763	Q15836;P63027;P23763	Vesicle-associated membrane protein 3;Vesicle-associated membrane protein 2;Vesicle-associated membrane protein 1	VAMP3;VAMP2;VAMP1	0.363965	-0.405966	11.309	6.1514	24.4196	23.5737	25.1651	24.8018	24.1581	24.1494	-1			2	2	2	270940000	5	15
Q5JWF2;P63092;P38405	Q5JWF2;P63092	Guanine nucleotide-binding protein G(s) subunit alpha isoforms XLas;Guanine nucleotide-binding protein G(s) subunit alpha isoforms short	GNAS	1.11309	-0.310686	111.02	54.806	28.2338	27.9734	28.6245	28.1542	28.3836	28.1822	-1			13	12	12	3740300000	35	135
P63096	P63096	Guanine nucleotide-binding protein G(i) subunit alpha-1	GNAI1	1.15423	-0.606805	40.361	55.061	26.9375	26.3445	27.0915	26.7672	27.6237	26.7206	-1			14	6	6	1819100000	17	69
P63098	P63098	Calcineurin subunit B type 1	PPP3R1	0.069182	0.0921001	19.3	4.0488	24.4052	24.2625	25.4219	25.462	24.67	25.0489	-1			3	3	3	388280000	10	11
P63104	P63104	14-3-3 protein zeta/delta	YWHAZ	0.894003	-0.443487	27.745	251.33	29.4102	28.991	30.0464	29.4511	29.6542	29.3382	-1			14	11	9	10262000000	19	184
P63151;Q66LE6;Q00005;Q9Y2T4	P63151	Serine/threonine-protein phosphatase 2A 55 kDa regulatory subunit B alpha isoform	PPP2R2A	0.919249	-0.586752	51.691	196.16	28.9163	28.1369	29.4104	28.9158	28.8136	28.3274	-1			18	18	18	5698000000	27	213
P63167	P63167	Dynein light chain 1, cytoplasmic	DYNLL1	0.0342265	0.0166022	10.366	150.89	30.0226	30.0576	30.474	30.3842	30.1964	30.3009	-1			4	4	1	14440000000	5	220
P63172	P63172	Dynein light chain Tctex-type 1	DYNLT1	0.201658	0.251773	12.452	10.19	23.601	24.3148	24.6456	24.6996	25.0554	25.0429	-1			4	4	4	389000000	7	19
Q8ND56	Q8ND56	Protein LSM14 homolog A	LSM14A	1.71848	-0.913318	50.529	56.973	28.2303	26.8862	28.3607	27.6594	28.08	27.3855	-1	+	BicD2_Trbo_RFP-Trbo	8	8	8	2506300000	22	84
O75643	O75643	U5 small nuclear ribonucleoprotein 200 kDa helicase	SNRNP200	1.86216	-0.913551	244.5	191.3	29.792	28.649	30.1332	29.1919	29.6218	28.9654	-1	+	BicD2_Trbo_RFP-Trbo	55	55	55	8547000000	122	422
P63218	P63218	Guanine nucleotide-binding protein G(I)/G(S)/G(O) subunit gamma-5	GNG5	0.510389	-0.512788	7.3184	5.2919	26.4525	25.3351	26.9401	26.5747	26.6514	26.5959	-1			1	1	1	852940000	5	6
P63220	P63220	40S ribosomal protein S21	RPS21	0.832601	-0.46364	9.1113	71.122	27.9448	27.2811	28.3855	28.0485	28.1681	27.7778	-1			4	4	4	3245300000	7	127
P63241;Q6IS14;Q9GZV4	P63241;Q6IS14	Eukaryotic translation initiation factor 5A-1;Eukaryotic translation initiation factor 5A-1-like	EIF5A;EIF5AL1	0.373526	-0.602622	16.832	294.73	30.936	29.3389	31.6038	31.4537	31.0811	31.0204	-1			8	8	8	25863000000	8	211
P63244	P63244	Guanine nucleotide-binding protein subunit beta-2-like 1;Guanine nucleotide-binding protein subunit beta-2-like 1, N-terminally processed	GNB2L1	0.579152	-0.352107	35.076	275.2	30.8059	30.2996	31.3694	31.0166	30.9015	30.7042	-1			19	19	19	22216000000	22	414
P41091;Q2VIR3	P41091;Q2VIR3	Eukaryotic translation initiation factor 2 subunit 3;Putative eukaryotic translation initiation factor 2 subunit 3-like protein	EIF2S3;EIF2S3L	1.63181	-0.913761	51.109	151.73	29.771	28.3929	29.9355	29.1744	29.6466	29.0446	-1	+	BicD2_Trbo_RFP-Trbo	17	17	17	7741500000	24	254
Q9Y3F4	Q9Y3F4	Serine-threonine kinase receptor-associated protein	STRAP	2.15199	-0.91471	38.438	264.18	29.901	28.8385	30.2597	29.2393	29.8603	29.199	-1	+	BicD2_Trbo_RFP-Trbo	15	15	15	8657800000	22	248
P63313	P63313	Thymosin beta-10	TMSB10	0.131284	-0.189003	5.0256	21.491	26.9371	26.2699	27.8179	27.8043	27.3396	27.4533	-1			1	1	1	2086900000	4	38
P67775;P62714	P67775;P62714	Serine/threonine-protein phosphatase 2A catalytic subunit alpha isoform;Serine/threonine-protein phosphatase 2A catalytic subunit beta isoform	PPP2CA;PPP2CB	0.274765	-0.253962	35.594	152.61	29.0231	28.2292	29.4606	29.1534	28.626	28.9652	-1			13	13	12	6061300000	18	216
P78346	P78346	Ribonuclease P protein subunit p30	RPP30	1.94192	-0.915049	29.321	26.083	26.499	25.4213	26.7677	26.0722	26.6102	25.6383	-1	+	BicD2_Trbo_RFP-Trbo	5	5	5	774010000	17	27
P67870	P67870	Casein kinase II subunit beta	CSNK2B	0.368545	-0.238775	24.942	29.341	26.5499	26.1677	27.0716	26.9472	26.7804	26.5707	-1			3	3	3	1238600000	11	32
P49643	P49643	DNA primase large subunit	PRIM2	1.6141	-0.918206	58.805	5.4937	25.2268	24.0516	25.0748	24.7846	25.5617	24.2725	-1	+	BicD2_Trbo_RFP-Trbo	5	5	5	325400000	35	5
P68036;A0A1B0GUS4	P68036	Ubiquitin-conjugating enzyme E2 L3	UBE2L3	0.74143	-1.30265	17.861	41.134	27.0621	24.5563	27.8572	27.096	27.1097	26.4688	-1			5	5	5	1749100000	8	68
P68104;Q5VTE0	P68104;Q5VTE0	Elongation factor 1-alpha 1;Putative elongation factor 1-alpha-like 3	EEF1A1;EEF1A1P5	0.590538	-0.446023	50.14	295.53	33.258	32.6587	33.9998	33.5354	33.4658	33.1913	-1			18	18	8	136110000000	23	553
P68133;P68032;P63267;P62736	P68133;P68032;P63267;P62736	Actin, alpha skeletal muscle;Actin, alpha cardiac muscle 1;Actin, gamma-enteric smooth muscle;Actin, aortic smooth muscle	ACTA1;ACTC1;ACTG2;ACTA2	0.561263	-0.399032	42.051	62.899	31.2645	30.6966	31.966	31.4573	31.4589	31.3383	-1			12	3	3	42189000000	23	105
P68363;P68366;Q9H853	P68363;P68366	Tubulin alpha-1B chain;Tubulin alpha-4A chain	TUBA1B;TUBA4A	0.490056	-0.413125	50.151	51.255	30.4815	29.9359	31.3155	30.841	30.8865	30.6672	-1			25	2	1	22572000000	22	97
P68371	P68371	Tubulin beta-4B chain	TUBB4B	0.702452	-0.337393	49.83	323.31	33.4489	32.9605	33.9083	33.4926	33.5399	33.4318	-1			23	23	1	150660000000	21	1076
P68400;Q8NEV1	P68400;Q8NEV1	Casein kinase II subunit alpha;Casein kinase II subunit alpha 3	CSNK2A1;CSNK2A3	0.261621	0.302736	45.143	38.691	27.4908	27.5474	27.9732	28.7633	28.4451	28.5067	-1			9	9	9	3091200000	21	92
P68402	P68402	Platelet-activating factor acetylhydrolase IB subunit beta	PAFAH1B2	0.34061	-0.361419	25.569	25.277	26.0286	25.265	26.8345	26.0619	25.7085	26.1604	-1			4	4	4	871800000	10	34
P69849;Q15155;Q5JPE7	P69849;Q15155;Q5JPE7	Nodal modulator 3;Nodal modulator 1;Nodal modulator 2	NOMO3;NOMO1;NOMO2	0.658581	-1.45504	134.13	5.7359	23.9525	20.5655	24.4973	23.308	23.0738	23.285	-1			7	7	7	225320000	69	11
P78312	P78312	Protein FAM193A	FAM193A	0.499758	1.00558	139.99	8.158	25.6729	27.5585	24.4397	25.6197	24.9138	24.8649	-1			6	6	6	816290000	54	13
Q9Y4P8	Q9Y4P8	WD repeat domain phosphoinositide-interacting protein 2	WIPI2	4.17179	-0.921244	49.408	140.56	29.8339	28.8924	29.9596	29.0203	29.8615	28.9786	-1	+	BicD2_Trbo_RFP-Trbo	14	14	14	7144700000	22	193
Q01130;Q9BRL6	Q01130;Q9BRL6	Serine/arginine-rich splicing factor 2;Serine/arginine-rich splicing factor 8	SRSF2;SRSF8	1.58532	-0.922759	25.476	9.349	26.9248	26.0342	27.5232	26.6792	27.1519	26.1182	-1	+	BicD2_Trbo_RFP-Trbo	4	4	4	1371200000	11	46
P61353	P61353	60S ribosomal protein L27	RPL27	3.08923	-0.927485	15.798	122.5	30.5106	29.531	30.7466	29.7325	30.5237	29.7349	-1	+	BicD2_Trbo_RFP-Trbo	5	5	5	13485000000	6	126
Q9BZE4	Q9BZE4	Nucleolar GTP-binding protein 1	GTPBP4	1.69999	-0.928392	73.964	14.718	26.0938	25.1756	25.6354	25.2202	26.4626	25.0108	-1	+	BicD2_Trbo_RFP-Trbo	10	10	10	599070000	42	24
P78347;Q86UP8;Q6EKJ0	P78347	General transcription factor II-I	GTF2I	0.0759379	-0.0642942	112.42	51.928	27.8623	27.4546	28.1441	28.4372	27.9308	27.8526	-1			24	24	24	3533700000	60	139
P78362;Q9UPE1	P78362	SRSF protein kinase 2;SRSF protein kinase 2 N-terminal;SRSF protein kinase 2 C-terminal	SRPK2	0.33288	-1.13894	77.526	4.2919	23.9354	21.1804	23.5151	21.272	23.8577	25.4389	-1			7	5	5	182990000	30	8
P78371	P78371	T-complex protein 1 subunit beta	CCT2	0.651913	-0.496581	57.488	323.31	31.2604	30.4936	31.9012	31.4595	31.483	31.2017	-1			31	31	31	33646000000	36	611
Q9H0H5	Q9H0H5	Rac GTPase-activating protein 1	RACGAP1	2.93093	-0.930238	71.026	14.197	26.2469	25.3581	26.2455	25.2146	25.9841	25.1131	-1	+	BicD2_Trbo_RFP-Trbo	8	8	8	514230000	37	23
P78417	P78417	Glutathione S-transferase omega-1	GSTO1	0.346852	-0.358791	27.566	42.985	27.232	26.5642	27.7986	27.9184	27.5829	27.0544	-1			9	9	9	2305600000	15	73
P78527	P78527	DNA-dependent protein kinase catalytic subunit	PRKDC	0.224945	-0.138618	469.08	323.31	30.6915	30.4188	31.2248	31.0022	30.7937	30.873	-1			119	119	119	25347000000	245	945
P78559	P78559	Microtubule-associated protein 1A;MAP1A heavy chain;MAP1 light chain LC2	MAP1A	0.64727	-1.10399	305.48	2.5081	23.2401	21.1692	23.8488	23.3431	24.0957	23.3603	-1			3	2	2	65952000	124	3
P80303	P80303	Nucleobindin-2;Nesfatin-1	NUCB2	0.523186	-0.278953	50.222	2.743	26.7465	26.4403	27.1869	26.8209	26.5451	26.3804	-1			2	2	2	1326300000	24	4
O75330	O75330	Hyaluronan mediated motility receptor	HMMR	2.69022	-0.930342	84.099	71.946	28.24	27.4237	28.4862	27.4508	28.1386	27.1993	-1	+	BicD2_Trbo_RFP-Trbo	17	17	17	2141700000	57	100
P82094	P82094	TATA element modulatory factor	TMF1	0.671256	1.24518	122.84	11.945	22.4839	25.6451	25.1333	25.0128	24.7075	25.4023	-1			9	9	9	285330000	71	10
P82650	P82650	28S ribosomal protein S22, mitochondrial	MRPS22	0.248266	-0.367428	41.28	13.75	24.6035	24.5355	25.8715	25.4146	26.1869	25.6095	-1			6	6	6	562160000	25	32
P82663	P82663	28S ribosomal protein S25, mitochondrial	MRPS25	0.0886396	-0.279316	20.116	1.7957	24.9002	24.8318	25.4213	26.3197	24.2968	22.6289	-1			3	3	3	381980000	11	2
P82664	P82664	28S ribosomal protein S10, mitochondrial	MRPS10	1.12598	-1.02195	22.999	1.8237	23.1086	21.8873	23.2237	21.4621	22.9629	22.88	-1			2	2	2	217340000	15	3
P82673	P82673	28S ribosomal protein S35, mitochondrial	MRPS35	0.708128	-0.436378	36.844	3.016	23.2985	23.0304	23.4916	23.4544	24.1267	23.1229	-1			2	2	2	146340000	21	12
P82930	P82930	28S ribosomal protein S34, mitochondrial	MRPS34	0.295169	-0.526571	25.65	7.5599	23.8348	23.8494	25.9075	24.1472	25.0138	25.1798	-1			4	4	4	381810000	15	35
P82933	P82933	28S ribosomal protein S9, mitochondrial	MRPS9	0.461826	0.562375	45.834	4.9263	22.7635	23.1869	23.9398	24.0213	22.3875	23.5696	-1			3	3	3	112790000	29	11
P82979	P82979	SAP domain-containing ribonucleoprotein	SARNP	0.257812	-0.254677	23.671	15.808	25.2811	24.5935	25.733	25.8479	25.6214	25.43	-1			5	5	5	635030000	12	36
P83111	P83111	Serine beta-lactamase-like protein LACTB, mitochondrial	LACTB	0.419912	-0.441865	60.693	24.254	27.0175	26.4653	26.434	25.8466	27.3064	27.1205	-1			10	10	10	1290800000	31	48
P83731	P83731	60S ribosomal protein L24	RPL24	0.973912	-0.691978	17.779	26.71	29.1944	28.6062	30.0963	29.2823	29.7801	29.1064	-1			7	7	7	8041700000	10	118
Q96EY5	Q96EY5	Multivesicular body subunit 12A	MVB12A	2.57534	-0.931013	28.783	8.8074	25.7768	24.642	25.7831	25.0927	25.9139	24.9461	-1	+	BicD2_Trbo_RFP-Trbo	2	2	2	477650000	14	23
P84085	P84085	ADP-ribosylation factor 5	ARF5	0.682072	-0.503389	20.529	9.2032	27.7048	26.7967	28.1032	27.8771	27.826	27.4499	-1			9	4	3	2547400000	13	32
Q07955	Q07955	Serine/arginine-rich splicing factor 1	SRSF1	1.47983	-0.933324	27.744	36.364	28.5941	27.3407	28.7227	28.0987	28.2469	27.3243	-1	+	BicD2_Trbo_RFP-Trbo	13	13	13	2975200000	15	112
P84098	P84098	60S ribosomal protein L19	RPL19	0.950048	-0.606199	23.466	60.577	29.2515	27.8784	29.0013	28.7293	28.8316	28.6581	-1			4	4	4	5005100000	9	79
P10606	P10606	Cytochrome c oxidase subunit 5B, mitochondrial	COX5B	1.5992	-0.93546	13.696	10.048	25.9791	24.8057	25.8016	25.5425	26.2081	24.8342	-1	+	BicD2_Trbo_RFP-Trbo	3	3	3	633760000	10	36
P84157	P84157	Matrix-remodeling-associated protein 7	MXRA7	0.304015	-1.00509	21.466	3.4818	23.8412	22.8044	24.756	23.9032	21.6739	20.5483	-1			1	1	1	105140000	7	5
P85298	P85298	Rho GTPase-activating protein 8	ARHGAP8	0.973694	-0.764116	53.483	2.0431	24.2597	23.591	23.6221	23.5014	24.1132	22.6102	-1			3	3	3	144230000	29	3
P86791;P86790	P86791;P86790	Vacuolar fusion protein CCZ1 homolog;Vacuolar fusion protein CCZ1 homolog B	CCZ1;CCZ1B	0.267604	-0.120214	55.866	14.859	25.9745	26.0612	25.9713	26.0816	26.4944	25.9367	-1			6	6	6	812360000	35	32
P98170	P98170	E3 ubiquitin-protein ligase XIAP	XIAP	0.0286849	-0.0459448	56.684	7.0068	24.3926	25.2169	26.0302	25.4859	25.9302	25.5124	-1			6	6	6	548830000	37	9
Q16555	Q16555	Dihydropyrimidinase-related protein 2	DPYSL2	3.30537	-0.940176	62.293	323.31	31.4708	30.3709	31.523	30.6313	31.3515	30.5225	-1	+	BicD2_Trbo_RFP-Trbo	27	27	23	22381000000	33	506
P98179	P98179	RNA-binding protein 3	RBM3	0.021108	-0.0720329	17.17	16.51	24.7717	23.7664	26.5465	26.626	23.9617	24.6714	-1			2	2	2	417830000	9	8
P99999;CON__P62894	P99999	Cytochrome c	CYCS	0.0463762	-0.106071	11.749	8.897	24.7028	25.2682	26.9875	26.5314	25.7104	25.2829	-1			5	5	5	740380000	8	33
Q9H6U6	Q9H6U6	Breast carcinoma-amplified sequence 3	BCAS3	3.05019	-0.94068	101.24	126.03	28.5484	27.7884	28.6762	27.5733	28.4622	27.503	-1	+	BicD2_Trbo_RFP-Trbo	16	16	16	2756100000	41	126
Q00325	Q00325	Phosphate carrier protein, mitochondrial	SLC25A3	0.599548	-0.286143	40.094	51.853	29.2041	28.8251	29.6977	29.3356	29.3398	29.2224	-1			10	10	10	7887100000	20	177
O95777	O95777	U6 snRNA-associated Sm-like protein LSm8	LSM8	2.09876	-0.94098	10.403	2.4649	24.9312	24.0196	24.6527	23.5966	24.9821	24.1268	-1	+	BicD2_Trbo_RFP-Trbo	1	1	1	242600000	7	10
Q00577	Q00577	Transcriptional activator protein Pur-alpha	PURA	0.797907	-1.49158	34.91	11.583	25.2389	23.3446	25.9045	25.1012	24.3759	22.5987	-1			3	3	3	247010000	15	12
Q00610	Q00610	Clathrin heavy chain 1	CLTC	0.663549	-0.436362	191.61	323.31	31.3743	30.6446	31.8802	31.4918	31.4693	31.2783	-1			62	62	51	35360000000	95	928
Q00688	Q00688	Peptidyl-prolyl cis-trans isomerase FKBP3	FKBP3	0.311827	-0.549925	25.177	69.051	27.27	25.8842	28.3688	27.9521	27.2676	27.4203	-1			8	8	8	2301400000	17	70
Q00765	Q00765	Receptor expression-enhancing protein 5	REEP5	0.378206	-1.4584	21.493	2.3996	22.0747	21.7722	26.2715	25.0181	24.7514	21.932	-1			1	1	1	273140000	8	11
Q00796	Q00796	Sorbitol dehydrogenase	SORD	0.0510164	0.0491269	38.324	26.92	25.3956	25.5434	26.2965	26.23	25.7261	25.7922	-1			7	7	7	767790000	23	31
Q00839	Q00839	Heterogeneous nuclear ribonucleoprotein U	HNRNPU	0.552928	-0.740545	90.583	258.38	30.785	29.63	31.8358	31.2948	30.8269	30.3012	-1			23	23	22	26650000000	44	373
Q01081	Q01081	Splicing factor U2AF 35 kDa subunit	U2AF1	0.867379	-0.973579	27.872	30.729	27.6938	26.0701	28.4634	27.5077	27.6762	27.3348	-1			6	6	4	2214700000	12	56
Q01082	Q01082	Spectrin beta chain, non-erythrocytic 1	SPTBN1	1.14132	-0.637213	274.61	145.69	28.4808	28.1941	29.3108	28.3779	29.1307	28.4385	-1			47	47	41	6021200000	161	228
Q01085;P31483	Q01085	Nucleolysin TIAR	TIAL1	0.153998	-0.40941	41.59	4.728	24.0927	23.1932	24.5993	24.2718	22.0861	22.0849	-1			3	3	3	166840000	20	7
Q01105;P0DME0	Q01105;P0DME0	Protein SET;Protein SETSIP	SET;SETSIP	0.244201	-0.298038	33.488	323.31	29.9327	29.2415	30.7541	30.6213	29.9496	29.8796	-1			8	8	8	14622000000	11	171
Q92878	Q92878	DNA repair protein RAD50	RAD50	1.96082	-0.943571	153.89	257.33	30.0883	28.7942	29.9638	29.4789	30.0025	28.9507	-1	+	BicD2_Trbo_RFP-Trbo	40	40	40	7125100000	97	271
P19105;O14950;P24844	P19105;O14950;P24844	Myosin regulatory light chain 12A;Myosin regulatory light chain 12B;Myosin regulatory light polypeptide 9	MYL12A;MYL12B;MYL9	3.22596	-0.944169	19.794	323.31	33.0171	31.926	33.1263	32.1844	32.9592	32.1597	-1	+	BicD2_Trbo_RFP-Trbo	9	9	9	123550000000	11	494
Q01469	Q01469	Fatty acid-binding protein, epidermal	FABP5	0.00873746	0.018287	15.164	10.583	25.3023	24.8633	26.6481	26.7607	25.5306	25.9119	-1			3	3	3	860920000	10	29
Q01518	Q01518	Adenylyl cyclase-associated protein 1	CAP1	0.341331	-0.316948	51.901	65.572	27.8188	27.2901	28.6554	28.2615	27.9927	27.9644	-1			14	14	13	3351900000	32	154
Q01581;P54868	Q01581	Hydroxymethylglutaryl-CoA synthase, cytoplasmic	HMGCS1	0.613836	-0.583322	57.293	19.821	25.2268	25.4601	26.6699	25.4061	25.8878	25.1684	-1			12	12	12	893020000	24	30
Q01658	Q01658	Protein Dr1	DR1	0.728004	1.42834	19.443	5.0479	21.156	23.5868	22.9338	24.8463	23.9401	23.8819	-1			1	1	1	133110000	8	8
Q01780	Q01780	Exosome component 10	EXOSC10	0.233648	0.323046	100.83	4.515	22.6433	23.1168	22.0674	21.5429	21.8196	22.8398	-1			3	3	3	59947000	62	7
Q01804	Q01804	OTU domain-containing protein 4	OTUD4	1.26149	-1.76408	124.04	4.7938	23.268	22.6613	23.3433	22.1215	25.0294	21.5656	-1			3	3	3	94916000	57	2
Q01813	Q01813	ATP-dependent 6-phosphofructokinase, platelet type	PFKP	0.402315	0.214148	85.595	197.64	29.0039	29.0783	29.429	29.7174	29.241	29.5207	-1			29	29	25	8328600000	37	347
Q01844	Q01844	RNA-binding protein EWS	EWSR1	0.810203	-0.906987	68.477	18.281	25.7898	25.6366	26.0287	25.6089	26.2749	24.127	-1			4	4	4	809960000	23	33
O75792	O75792	Ribonuclease H2 subunit A	RNASEH2A	1.71562	-0.944511	33.395	5.4972	24.9081	23.3872	24.5782	24.0624	24.8675	24.0706	-1	+	BicD2_Trbo_RFP-Trbo	4	4	4	242450000	16	16
Q14683	Q14683	Structural maintenance of chromosomes protein 1A	SMC1A	2.09006	-0.945175	143.23	32.403	27.2127	26.0322	27.2405	26.2112	27.3011	26.6755	-1	+	BicD2_Trbo_RFP-Trbo	20	20	20	2127500000	87	81
Q02241	Q02241	Kinesin-like protein KIF23	KIF23	0.788809	-0.476232	110.06	34.046	27.2341	26.8601	27.4188	26.7016	26.6599	26.3224	-1			10	10	10	1406700000	55	69
P19447	P19447	TFIIH basal transcription factor complex helicase XPB subunit	ERCC3	1.61602	-0.945352	89.277	10.671	25.2759	24.9953	26.0157	24.8298	26.0402	24.6706	-1	+	BicD2_Trbo_RFP-Trbo	5	5	5	315410000	49	10
Q02750	Q02750	Dual specificity mitogen-activated protein kinase kinase 1	MAP2K1	0.678851	-0.675866	43.439	9.2648	25.5538	24.2113	25.8348	25.7164	25.4248	24.8581	-1			6	6	5	433450000	18	14
Q02790	Q02790	Peptidyl-prolyl cis-trans isomerase FKBP4;Peptidyl-prolyl cis-trans isomerase FKBP4, N-terminally processed	FKBP4	0.385281	-0.32878	51.804	185.72	29.0941	28.5853	29.8649	29.5314	29.2861	29.1421	-1			19	19	19	7624100000	31	232
Q02809	Q02809	Procollagen-lysine,2-oxoglutarate 5-dioxygenase 1	PLOD1	0.13072	-0.481633	83.549	4.1457	24.667	23.5878	21.1107	21.5173	24.4691	23.6968	-1			3	3	3	242710000	47	5
Q9UK76	Q9UK76	Hematological and neurological expressed 1 protein;Hematological and neurological expressed 1 protein, N-terminally processed	HN1	2.31173	-0.946208	16.014	72.144	28.7289	27.6838	28.9844	28.2005	28.9089	27.8993	-1	+	BicD2_Trbo_RFP-Trbo	7	7	7	3349900000	8	79
Q02952	Q02952	A-kinase anchor protein 12	AKAP12	1.17604	-0.546836	191.48	30.764	27.1555	26.4448	27.5308	26.973	27.4132	27.0411	-1			14	14	14	1586400000	89	48
Q02978	Q02978	Mitochondrial 2-oxoglutarate/malate carrier protein	SLC25A11	0.211034	-0.154095	34.061	27.806	27.1243	26.9749	27.6695	27.6924	27.7268	27.391	-1			10	10	10	2338600000	20	104
Q659A1	Q659A1	Little elongation complex subunit 2	ICE2	1.53665	-0.947232	110.01	2.8439	22.1039	21.9323	22.8341	21.4452	22.6093	21.3282	-1	+	BicD2_Trbo_RFP-Trbo	2	2	2	14644000	53	2
Q03252	Q03252	Lamin-B2	LMNB2	1.02571	-1.0052	69.948	3.3221	22.2233	20.7618	22.853	22.0278	21.931	21.202	-1			3	3	3	68643000	41	5
Q04206	Q04206	Transcription factor p65	RELA	0.352009	0.553546	60.218	6.7046	23.3166	24.5849	25.2426	25.5916	24.7243	24.7676	-1			7	7	7	342230000	26	6
Q04323	Q04323	UBX domain-containing protein 1	UBXN1	0.397578	-0.961098	33.325	3.8254	22.7536	21.091	24.4103	22.4698	23.492	24.2118	-1			2	2	2	129190000	13	3
O14617	O14617	AP-3 complex subunit delta-1	AP3D1	3.716	-0.94763	130.16	287.68	30.7227	29.6612	30.78	29.8054	30.7017	29.8949	-1	+	BicD2_Trbo_RFP-Trbo	37	37	37	12422000000	57	438
Q04760	Q04760	Lactoylglutathione lyase	GLO1	0.645844	-0.582116	20.777	49.556	29.2278	28.5506	30.0981	29.6305	29.8339	29.2323	-1			10	10	10	9374200000	12	187
Q04837	Q04837	Single-stranded DNA-binding protein, mitochondrial	SSBP1	0.101283	-0.123927	17.259	53.471	26.4033	26.2702	27.3511	27.4245	27.1327	26.8207	-1			6	6	6	1717000000	11	47
Q04917	Q04917	14-3-3 protein eta	YWHAH	1.2488	-0.522928	28.218	70.546	27.2556	26.3064	27.1971	26.9526	27.1766	26.8016	-1			9	6	6	1670100000	18	70
Q04941	Q04941	Proteolipid protein 2	PLP2	0.192119	0.164394	16.691	6.1174	23.6419	23.7058	24.4522	24.3832	23.8506	24.3489	-1			1	1	1	231980000	6	7
Q05048	Q05048	Cleavage stimulation factor subunit 1	CSTF1	0.763149	-1.97291	48.357	3.0367	24.9056	20.8456	24.5782	24.9247	25.1536	22.9484	-1			3	3	3	260430000	19	9
Q05209	Q05209	Tyrosine-protein phosphatase non-receptor type 12	PTPN12	0.0135446	-0.012359	88.105	2.4504	24.4681	24.5627	24.3751	24.849	24.4449	23.8392	-1			4	4	4	218150000	46	5
Q05519	Q05519	Serine/arginine-rich splicing factor 11	SRSF11	0.466843	-0.450383	53.542	7.9289	25.7817	24.7293	25.6595	24.661	25.0381	25.738	-1			4	4	4	431850000	16	24
Q05639	Q05639	Elongation factor 1-alpha 2	EEF1A2	0.0960145	0.161759	50.47	22.577	24.9441	24.3004	25.5405	26.2642	25.2057	25.611	-1			13	3	3	758190000	23	23
Q15393	Q15393	Splicing factor 3B subunit 3	SF3B3	3.12852	-0.947877	135.58	323.31	32.1351	31.0262	32.1696	31.3176	32.2134	31.3306	-1	+	BicD2_Trbo_RFP-Trbo	47	47	47	32414000000	60	701
Q06124	Q06124	Tyrosine-protein phosphatase non-receptor type 11	PTPN11	0.977603	-0.949731	68.01	18.088	26.3063	24.9495	27.0239	26.3404	26.6146	25.8057	-1			9	9	9	829200000	42	35
Q06203	Q06203	Amidophosphoribosyltransferase	PPAT	0.50261	-0.567353	57.398	10.943	25.7946	25.2013	26.8171	26.4535	26.7523	26.0071	-1			9	9	9	779370000	25	34
Q06210;O94808	Q06210	Glutamine--fructose-6-phosphate aminotransferase [isomerizing] 1	GFPT1	0.313844	-0.299304	78.806	39.143	27.2086	26.0313	26.7269	26.3425	26.4428	27.1065	-1			15	15	15	1611700000	49	78
Q06265	Q06265	Exosome complex component RRP45	EXOSC9	1.28108	-0.875418	48.948	8.1854	25.3667	24.2843	25.239	24.2004	25.6386	25.1334	-1			4	4	4	379070000	17	20
Q06323	Q06323	Proteasome activator complex subunit 1	PSME1	0.0180166	-0.0282904	28.723	41.53	27.0514	26.0169	26.7696	27.7135	27.2248	27.2306	-1			10	10	10	1505600000	19	76
Q9H0D6	Q9H0D6	5-3 exoribonuclease 2	XRN2	1.50935	-0.947941	108.58	34.295	27.1975	26.1491	27.697	26.892	27.2	26.2095	-1	+	BicD2_Trbo_RFP-Trbo	11	11	11	1287500000	54	77
Q06830	Q06830	Peroxiredoxin-1	PRDX1	0.163484	-0.132335	22.11	182.74	31.6705	31.521	32.4237	32.2049	32.1215	32.0928	-1			13	13	10	50384000000	14	353
O95905	O95905	Protein SGT1	ECD	1.32218	-0.951406	72.757	9.6892	24.9437	24.4901	25.1279	24.5609	25.9388	24.1052	-1	+	BicD2_Trbo_RFP-Trbo	4	4	4	412020000	30	28
Q07021	Q07021	Complement component 1 Q subcomponent-binding protein, mitochondrial	C1QBP	1.13233	-0.755801	31.362	126.72	30.3596	29.468	31.0297	30.3018	30.5258	29.8779	-1			6	6	6	16084000000	15	190
Q07065	Q07065	Cytoskeleton-associated protein 4	CKAP4	0.201358	-0.106853	66.022	52.283	27.318	27.2823	27.8984	27.6808	27.5391	27.4719	-1			18	18	18	2377800000	45	127
P42167	P42167	Lamina-associated polypeptide 2, isoforms beta/gamma;Thymopoietin;Thymopentin	TMPO	1.96206	-0.956153	50.67	145.13	29.0526	27.8936	28.997	28.5274	29.3217	28.0818	-1	+	BicD2_Trbo_RFP-Trbo	18	9	9	6157900000	25	169
Q07283;REV__A8MVU1;REV__P14598;REV__A6NI72;Q9H9F9	Q07283;REV__A8MVU1;REV__P14598;REV__A6NI72;Q9H9F9	Trichohyalin;Actin-related protein 5	TCHH;ACTR5	1.24222	-1.49189	253.92	1.8256	22.359	21.3377	23.9127	21.5286	23.4618	22.3914	-1			2	2	2	102620000	103	7
P62910	P62910	60S ribosomal protein L32	RPL32	1.64368	-0.956856	15.86	54.405	28.3623	27.6847	28.7282	27.8014	28.3207	27.0546	-1	+	BicD2_Trbo_RFP-Trbo	4	4	4	3011000000	8	109
Q07812	Q07812	Apoptosis regulator BAX	BAX	0.585477	-0.650043	21.184	5.6273	23.7712	22.7982	24.8362	23.9732	23.8971	23.783	-1			2	2	2	182240000	11	14
Q07866;Q6P597	Q07866	Kinesin light chain 1	KLC1	0.854136	0.486357	65.309	82.254	27.9617	28.226	28.4792	28.7213	27.8535	28.8062	-1			24	24	14	4023600000	37	215
P26368	P26368	Splicing factor U2AF 65 kDa subunit	U2AF2	1.69927	-0.957391	53.5	41.643	28.1514	27.339	28.7494	27.1399	28.0755	27.6252	-1	+	BicD2_Trbo_RFP-Trbo	7	7	7	2919700000	19	93
Q07960	Q07960	Rho GTPase-activating protein 1	ARHGAP1	0.240823	0.502099	50.435	2.3731	22.4055	22.1943	23.7461	23.5532	21.2719	23.1823	-1			2	2	2	66803000	26	3
Q08170	Q08170	Serine/arginine-rich splicing factor 4	SRSF4	0.985703	-0.99497	56.678	1.7469	24.14	21.9699	23.8379	23.3445	23.5821	23.2607	-1			6	2	2	109390000	21	2
Q08209;P16298;P48454	Q08209;P16298	Serine/threonine-protein phosphatase 2B catalytic subunit alpha isoform;Serine/threonine-protein phosphatase 2B catalytic subunit beta isoform	PPP3CA;PPP3CB	1.25451	-1.89295	58.687	5.0913	25.0405	22.187	25.4822	23.6347	25.538	24.5602	-1			4	4	4	268580000	27	12
Q08211	Q08211	ATP-dependent RNA helicase A	DHX9	1.13035	-0.705381	140.96	249.67	29.9786	28.9429	30.4312	29.7611	29.88	29.4696	-1			29	29	29	10591000000	73	326
Q08257	Q08257	Quinone oxidoreductase	CRYZ	0.387351	0.670137	35.206	2.9679	20.9141	22.4719	23.3634	23.0498	22.1674	22.9336	-1			2	2	2	121720000	20	3
Q08378	Q08378	Golgin subfamily A member 3	GOLGA3	0.108071	0.438029	167.35	5.5183	25.6462	22.1785	22.0291	24.0192	21.478	24.2696	-1			6	6	6	160240000	95	9
Q9NQC3	Q9NQC3	Reticulon-4	RTN4	1.58519	-0.959112	129.93	31.49	27.3514	26.0025	27.6863	26.7411	27.0916	26.5085	-1	+	BicD2_Trbo_RFP-Trbo	7	7	7	1375900000	48	51
Q08752	Q08752	Peptidyl-prolyl cis-trans isomerase D	PPID	0.705432	-0.977631	40.763	4.8487	23.3303	22.3807	24.014	23.8934	24.9068	23.0443	-1			4	3	3	132420000	30	10
Q08945	Q08945	FACT complex subunit SSRP1	SSRP1	0.498747	-0.782466	81.074	3.5393	24.3454	22.7401	22.4727	22.9482	22.9142	21.6966	-1			3	3	3	108560000	40	6
Q08AD1	Q08AD1	Calmodulin-regulated spectrin-associated protein 2	CAMSAP2	0.405406	-0.68712	168.09	3.5855	24.9528	23.1485	24.2515	24.0262	22.842	22.8102	-1			3	3	3	129280000	86	5
Q08AM6	Q08AM6	Protein VAC14 homolog	VAC14	0.699846	0.952856	87.972	2.1609	22.4245	22.3637	23.0063	23.6541	21.658	23.9295	-1			2	2	2	57441000	42	0
Q08J23	Q08J23	tRNA (cytosine(34)-C(5))-methyltransferase	NSUN2	0.274755	-0.245956	86.47	85.31	28.7215	28.3466	29.4198	29.3608	29.2157	28.9117	-1			27	27	27	6578300000	48	255
Q09028	Q09028	Histone-binding protein RBBP4	RBBP4	0.251666	-0.295423	47.655	141.57	27.9128	27.6026	29.1511	28.3076	28.2989	28.5663	-1			13	8	8	3611200000	15	103
P52597	P52597	Heterogeneous nuclear ribonucleoprotein F;Heterogeneous nuclear ribonucleoprotein F, N-terminally processed	HNRNPF	1.69634	-0.959257	45.671	323.31	29.9883	28.9164	30.5614	29.558	30.0889	29.2865	-1	+	BicD2_Trbo_RFP-Trbo	14	12	12	9710300000	21	199
Q09666	Q09666	Neuroblast differentiation-associated protein AHNAK	AHNAK	0.674262	0.107194	629.09	323.31	32.1029	32.1121	32.0414	32.1567	32.1341	32.3312	-1			161	161	161	55309000000	413	1531
Q0JRZ9	Q0JRZ9	F-BAR domain only protein 2	FCHO2	1.27536	-1.27026	88.923	4.0033	24.1644	22.3451	23.1879	22.862	24.6333	22.9677	-1			3	3	3	93657000	40	5
O94832	O94832	Unconventional myosin-Id	MYO1D	4.4705	-0.959627	116.2	323.31	31.7759	30.8234	31.7662	30.7807	31.662	30.7213	-1	+	BicD2_Trbo_RFP-Trbo	57	57	55	41309000000	74	880
Q0VDF9	Q0VDF9	Heat shock 70 kDa protein 14	HSPA14	0.29697	-0.684266	54.794	10.597	25.1003	22.7069	25.7652	25.2174	24.1497	25.0381	-1			5	5	5	329110000	31	11
Q0VGL1	Q0VGL1	Ragulator complex protein LAMTOR4;Ragulator complex protein LAMTOR4, N-terminally processed	LAMTOR4	0.471653	-1.00683	10.741	11.041	24.6803	23.8783	23.3633	24.3963	25.1907	21.9393	-1			2	2	2	158070000	3	8
Q10471	Q10471	Polypeptide N-acetylgalactosaminyltransferase 2;Polypeptide N-acetylgalactosaminyltransferase 2 soluble form	GALNT2	0.105556	-0.0899207	64.732	2.1232	23.1129	22.7005	23.6214	23.5548	23.2008	23.41	-1			1	1	1	114580000	35	4
Q10567	Q10567	AP-1 complex subunit beta-1	AP1B1	0.748298	-0.839293	104.64	47.07	26.5645	25.4179	27.3697	26.9108	27.3562	26.4438	-1			25	11	11	1262200000	47	51
Q10713	Q10713	Mitochondrial-processing peptidase subunit alpha	PMPCA	0.240645	-0.425068	58.252	8.9349	23.2468	22.7369	25.0397	23.6379	23.5434	24.18	-1			5	5	5	211310000	30	8
Q9BVP2	Q9BVP2	Guanine nucleotide-binding protein-like 3	GNL3	2.93656	-0.961725	61.992	12.552	26.4455	25.6681	26.5005	25.3336	26.5888	25.6479	-1	+	BicD2_Trbo_RFP-Trbo	9	9	9	681340000	30	30
P37802;Q9UI15	P37802	Transgelin-2	TAGLN2	1.93558	-0.962798	22.391	221.66	31.7867	30.6552	32.1543	31.2835	31.8013	30.9153	-1	+	BicD2_Trbo_RFP-Trbo	13	13	13	29407000000	14	282
Q12792	Q12792	Twinfilin-1	TWF1	1.14155	-1.1272	40.282	48.954	27.4161	25.8015	28.01	27.2911	27.6035	26.5555	-1			12	12	12	1659800000	23	77
Q8WWY3	Q8WWY3	U4/U6 small nuclear ribonucleoprotein Prp31	PRPF31	3.31913	-0.963364	55.455	4.4375	25.0468	23.8609	24.7697	23.9693	24.9208	24.017	-1	+	BicD2_Trbo_RFP-Trbo	2	2	2	183950000	24	11
Q12802	Q12802	A-kinase anchor protein 13	AKAP13	0.733209	-0.501596	307.55	10.245	25.4399	25.3251	25.2195	25.0816	25.6012	24.3491	-1			8	8	8	360210000	130	18
Q12834	Q12834	Cell division cycle protein 20 homolog	CDC20	0.831991	1.26304	54.722	11.503	24.3475	25.6014	25.7502	26.168	23.4276	25.545	-1			8	8	8	469390000	25	9
Q12849	Q12849	G-rich sequence factor 1	GRSF1	0.413314	-0.85239	53.126	6.6783	24.7852	22.6591	25.3695	25.6247	24.815	24.1286	-1			5	5	5	353420000	31	20
Q12874	Q12874	Splicing factor 3A subunit 3	SF3A3	0.50835	-0.336409	58.848	73.395	27.7089	27.0825	27.9907	28.0334	27.984	27.5584	-1			14	14	14	2343200000	27	104
Q12899	Q12899	Tripartite motif-containing protein 26	TRIM26	1.09538	-1.05076	62.165	6.5106	25.3709	23.5069	23.8639	23.6921	24.887	23.7705	-1			5	5	5	198130000	31	3
Q12904	Q12904	Aminoacyl tRNA synthase complex-interacting multifunctional protein 1;Endothelial monocyte-activating polypeptide 2	AIMP1	0.0217279	-0.0135352	34.352	37.447	27.6322	27.3382	27.6381	27.844	27.8998	27.9473	-1			10	10	10	2660700000	18	74
Q12905	Q12905	Interleukin enhancer-binding factor 2	ILF2	0.601827	-0.475098	43.062	157.14	29.1668	28.569	29.9464	29.4239	29.219	28.9141	-1			15	15	15	7222700000	21	208
Q12906;Q96SI9	Q12906	Interleukin enhancer-binding factor 3	ILF3	0.845396	-0.667092	95.337	226.21	29.5409	28.6338	30.205	29.5874	29.4521	28.9756	-1			24	24	24	9111500000	39	271
Q12907	Q12907	Vesicular integral-membrane protein VIP36	LMAN2	0.391558	1.58787	40.228	9.9212	24.6724	24.2638	25.4445	25.7331	20.1308	25.0144	-1			5	5	5	498390000	19	22
P18621;O60437	P18621	60S ribosomal protein L17	RPL17	2.98591	-0.963365	21.397	163.45	30.4224	29.3673	30.6365	29.6093	30.4799	29.6722	-1	+	BicD2_Trbo_RFP-Trbo	9	9	9	13180000000	11	149
Q12931	Q12931	Heat shock protein 75 kDa, mitochondrial	TRAP1	0.123734	-0.193023	80.109	128.93	28.3221	27.7413	29.4066	29.1383	28.9301	29.2001	-1			19	19	19	5771400000	48	208
Q9Y2J2;Q9H4G0	Q9Y2J2	Band 4.1-like protein 3;Band 4.1-like protein 3, N-terminally processed	EPB41L3	1.94275	-0.965589	120.68	101.28	28.0228	27.3007	28.61	27.4242	28.6138	27.6249	-1	+	BicD2_Trbo_RFP-Trbo	22	18	16	2682100000	59	98
P27635;Q96L21	P27635	60S ribosomal protein L10	RPL10	2.41561	-0.96999	24.604	76.872	30.392	29.3278	30.7052	29.7871	30.5216	29.5939	-1	+	BicD2_Trbo_RFP-Trbo	9	9	9	12780000000	13	200
P22087	P22087	rRNA 2-O-methyltransferase fibrillarin	FBL	2.51737	-0.97008	33.784	36.489	27.9445	26.993	28.331	27.0802	27.8673	27.1593	-1	+	BicD2_Trbo_RFP-Trbo	6	6	5	2443600000	22	76
Q12979	Q12979	Active breakpoint cluster region-related protein	ABR	0.605535	-0.225138	97.597	10.495	25.6918	25.7007	25.5219	25.4498	25.9762	25.364	-1			8	8	7	574520000	49	19
Q13011	Q13011	Delta(3,5)-Delta(2,4)-dienoyl-CoA isomerase, mitochondrial	ECH1	0.292127	0.32157	35.816	68.033	26.157	26.622	27.3248	27.4633	27.0508	27.412	-1			10	10	10	1812700000	22	69
Q9NYL9	Q9NYL9	Tropomodulin-3	TMOD3	3.94916	-0.970591	39.594	147.95	28.8607	27.8586	28.7448	27.7716	28.8775	27.9412	-1	+	BicD2_Trbo_RFP-Trbo	14	14	13	4529100000	23	156
O43143	O43143	Pre-mRNA-splicing factor ATP-dependent RNA helicase DHX15	DHX15	2.44877	-0.971017	90.932	82.035	29.3708	28.394	29.7423	28.7098	29.65	28.7462	-1	+	BicD2_Trbo_RFP-Trbo	25	25	25	6347900000	43	262
Q13042	Q13042	Cell division cycle protein 16 homolog	CDC16	0.184166	-0.475314	71.655	4.778	24.4705	22.1895	21.3847	21.6424	22.2932	22.8906	-1			5	5	5	146770000	34	4
P67809;Q9Y2T7	P67809	Nuclease-sensitive element-binding protein 1	YBX1	1.55729	-0.97639	35.924	140.17	30.3146	28.9759	30.6888	29.8541	30.26	29.5042	-1	+	BicD2_Trbo_RFP-Trbo	9	9	6	11626000000	13	150
P46776	P46776	60S ribosomal protein L27a	RPL27A	1.69505	-0.979059	16.561	33.883	30.0166	28.8937	30.4061	29.6793	30.1741	29.0867	-1	+	BicD2_Trbo_RFP-Trbo	7	7	7	10333000000	8	113
Q13057	Q13057	Bifunctional coenzyme A synthase;Phosphopantetheine adenylyltransferase;Dephospho-CoA kinase	COASY	0.108382	-0.275347	62.328	9.7762	24.7346	24.6387	25.9128	24.8559	23.1258	23.4526	-1			4	4	4	349600000	22	14
Q13077	Q13077	TNF receptor-associated factor 1	TRAF1	0.989756	-4.46076	46.163	1.5932	28.1539	21.3429	28.1384	27.8735	28.0519	21.7455	-1			1	1	1	2391600000	23	11
Q13642	Q13642	Four and a half LIM domains protein 1	FHL1	1.78844	-0.981016	36.263	71.965	28.8318	27.3671	28.8789	28.0468	28.7915	28.1452	-1	+	BicD2_Trbo_RFP-Trbo	8	8	8	3599100000	24	101
Q13098	Q13098	COP9 signalosome complex subunit 1	GPS1	0.286114	-0.416243	55.536	14.857	25.2708	25.018	26.4514	25.9736	26.7622	26.2442	-1			8	8	8	747350000	26	45
Q13123	Q13123	Protein Red	IK	0.858207	-0.908682	65.601	3.5158	23.8193	21.9604	23.9793	23.5221	23.3636	22.9537	-1			3	3	3	105900000	29	5
Q13126	Q13126	S-methyl-5-thioadenosine phosphorylase	MTAP	0.302304	0.55345	31.236	7.5695	23.5976	23.4301	24.9628	25.2014	23.3801	24.9694	-1			3	3	3	305920000	18	17
Q13131	Q13131	5-AMP-activated protein kinase catalytic subunit alpha-1	PRKAA1	0.783657	-0.679016	64.009	7.8259	26.0774	24.4041	25.3531	25.228	25.7831	25.5445	-1			7	7	6	495680000	33	12
P55265	P55265	Double-stranded RNA-specific adenosine deaminase	ADAR	1.86036	-0.985341	136.06	9.3093	26.1459	25.2792	26.6169	25.7198	26.7986	25.6065	-1	+	BicD2_Trbo_RFP-Trbo	7	7	7	735400000	75	30
Q13137	Q13137	Calcium-binding and coiled-coil domain-containing protein 2	CALCOCO2	0.140882	-0.123744	52.253	54.347	27.9548	27.2252	28.089	27.9332	27.3143	27.8284	-1			14	14	14	2746100000	28	100
Q13144	Q13144	Translation initiation factor eIF-2B subunit epsilon	EIF2B5	1.24242	-1.64774	80.379	2.4566	23.9467	21.6086	24.5625	22.3166	23.9817	23.6225	-1			2	2	2	107020000	35	3
Q13148	Q13148	TAR DNA-binding protein 43	TARDBP	0.737824	-0.68024	44.739	63.042	27.4825	26.6237	28.3022	27.8345	27.9604	27.2462	-1			6	6	6	2439800000	17	101
Q13151	Q13151	Heterogeneous nuclear ribonucleoprotein A0	HNRNPA0	0.0370475	0.069582	30.84	55.56	26.2974	27.2168	28.0517	27.9437	27.2123	26.6096	-1			7	7	7	1959000000	14	43
Q13155	Q13155	Aminoacyl tRNA synthase complex-interacting multifunctional protein 2	AIMP2	0.527371	-0.43226	35.348	41.199	26.8902	26.4875	27.8146	26.8104	27.1913	27.3015	-1			5	5	5	1645900000	18	52
Q13162	Q13162	Peroxiredoxin-4	PRDX4	0.39844	0.777598	30.54	16.64	24.2623	25.2811	26.5119	26.9725	25.0259	25.8794	-1			6	4	4	799850000	15	33
O95400	O95400	CD2 antigen cytoplasmic tail-binding protein 2	CD2BP2	2.25946	-0.98651	37.646	1.8581	24.9164	23.6027	24.316	23.5536	24.6116	23.7282	-1	+	BicD2_Trbo_RFP-Trbo	2	2	2	194750000	15	4
Q13185;P83916	Q13185	Chromobox protein homolog 3	CBX3	1.22634	-0.85903	20.811	26.301	26.3356	24.9364	26.1263	25.7942	26.6623	25.8166	-1			6	6	5	865990000	10	59
O75569	O75569	Interferon-inducible double-stranded RNA-dependent protein kinase activator A	PRKRA	1.33267	-0.986996	34.404	5.9614	24.8285	23.9905	24.237	23.0242	24.7112	23.801	-1	+	BicD2_Trbo_RFP-Trbo	3	3	3	198730000	16	10
Q13190	Q13190	Syntaxin-5	STX5	0.0247043	0.059761	39.672	2.7141	21.1652	22.6916	23.5763	23.0633	23.5593	22.7253	-1			1	1	1	71429000	22	6
Q7Z478	Q7Z478	ATP-dependent RNA helicase DHX29	DHX29	2.46285	-0.987212	155.23	9.7364	25.3362	24.008	24.8177	24.1219	24.9556	24.0178	-1	+	BicD2_Trbo_RFP-Trbo	7	7	6	241870000	83	6
Q13232	Q13232	Nucleoside diphosphate kinase 3	NME3	1.05716	-1.10399	19.015	2.9414	23.0241	22.7062	24.1256	21.6641	23.3407	22.8081	-1			2	2	2	94556000	12	3
Q5EBL8	Q5EBL8	PDZ domain-containing protein 11	PDZD11	1.86912	-0.987245	16.131	19	26.2312	25.545	26.3881	24.862	26.3066	25.5571	-1	+	BicD2_Trbo_RFP-Trbo	5	5	5	628610000	8	17
Q13243	Q13243	Serine/arginine-rich splicing factor 5	SRSF5	0.983121	-0.999371	31.263	11.058	25.6768	24.7302	26.8631	25.8006	26.5155	25.5265	-1			6	5	5	793730000	14	28
P83881;Q969Q0	P83881;Q969Q0	60S ribosomal protein L36a;60S ribosomal protein L36a-like	RPL36A;RPL36AL	1.30752	-0.988532	12.441	5.3654	26.3369	25.4068	27.3081	26.0849	26.5458	25.7335	-1	+	BicD2_Trbo_RFP-Trbo	3	3	3	1015200000	6	29
Q13257	Q13257	Mitotic spindle assembly checkpoint protein MAD2A	MAD2L1	0.568301	-0.350433	23.51	33.112	26.7343	25.9679	26.97	26.5604	26.7378	26.8625	-1			8	8	8	1312800000	15	43
Q13263	Q13263	Transcription intermediary factor 1-beta	TRIM28	0.310081	-0.364417	88.549	323.31	29.969	29.6522	31.2007	30.6909	30.7486	30.482	-1			27	27	27	18961000000	32	496
Q9UJS0;O75746	Q9UJS0	Calcium-binding mitochondrial carrier protein Aralar2	SLC25A13	2.33879	-0.988693	74.175	30.302	28.0559	26.6701	27.996	27.0814	27.6821	27.0165	-1	+	BicD2_Trbo_RFP-Trbo	20	20	20	2244000000	35	111
Q96N67;Q8NF50	Q96N67	Dedicator of cytokinesis protein 7	DOCK7	3.62838	-0.989002	242.56	323.31	31.1851	30.2752	31.157	30.0712	31.0479	30.0765	-1	+	BicD2_Trbo_RFP-Trbo	60	60	58	18357000000	119	578
Q13325	Q13325	Interferon-induced protein with tetratricopeptide repeats 5	IFIT5	0.390207	0.222486	55.846	33.818	26.7784	26.414	26.4026	27.0906	26.3345	26.6784	-1			10	10	10	989740000	30	50
Q13347	Q13347	Eukaryotic translation initiation factor 3 subunit I	EIF3I	0.814738	-0.465633	36.501	214.73	29.8727	29.0799	30.201	29.9012	29.9989	29.6946	-1			17	17	17	10419000000	22	301
Q13363	Q13363	C-terminal-binding protein 1	CTBP1	0.253328	0.579508	47.535	3.4415	21.0545	22.7744	24.1208	23.0611	22.3302	23.4086	-1			2	1	1	78241000	21	3
Q9P0K7;REV__Q8N715;REV__Q6Y7W6;Q9C0D0	Q9P0K7	Ankycorbin	RAI14	3.29343	-0.989093	110.04	323.31	30.6594	29.4877	30.6598	29.5978	30.4911	29.7576	-1	+	BicD2_Trbo_RFP-Trbo	40	40	39	16946000000	67	511
Q9BPU6	Q9BPU6	Dihydropyrimidinase-related protein 5	DPYSL5	1.31999	-0.994141	61.421	17.768	27.2326	25.8558	27.341	25.9343	26.2464	26.0474	-1	+	BicD2_Trbo_RFP-Trbo	9	9	9	1157100000	31	40
Q13416	Q13416	Origin recognition complex subunit 2	ORC2	1.12711	-1.89643	65.971	6.9296	25.1488	22.1721	23.0516	23.3256	24.8912	21.9046	-1			6	6	6	127720000	32	8
Q13423	Q13423	NAD(P) transhydrogenase, mitochondrial	NNT	0.936187	-1.11685	113.89	2.8499	23.2839	22.7788	24.86	22.8878	24.5456	23.6724	-1			3	3	3	216740000	49	6
Q13425	Q13425	Beta-2-syntrophin	SNTB2	0.0700607	-0.323916	57.949	2.651	23.278	26.4011	23.6331	23.3721	27.2503	23.4165	-1			2	2	1	345540000	30	11
P35579;REV__P00519;REV__Q9UKV3	P35579	Myosin-9	MYH9	3.84503	-0.994507	226.53	323.31	35.811	34.8137	35.9827	34.9365	35.7952	34.8552	-1	+	BicD2_Trbo_RFP-Trbo	132	115	105	1012300000000	127	4732
P16989	P16989	Y-box-binding protein 3	YBX3	1.81113	-0.996254	40.089	54.922	27.5601	26.7096	28.1349	26.556	27.6987	27.1392	-1	+	BicD2_Trbo_RFP-Trbo	9	6	6	1999700000	18	72
Q13435	Q13435	Splicing factor 3B subunit 2	SF3B2	1.26424	-0.89296	100.23	23.647	27.1886	26.0911	27.83	26.9933	27.2484	26.5037	-1			13	13	13	1579200000	52	58
P62851	P62851	40S ribosomal protein S25	RPS25	1.74597	-1.00077	13.742	12.804	30.344	28.6867	29.961	29.3215	29.7183	29.0128	-1	+	BicD2_Trbo_RFP-Trbo	4	4	4	8302200000	6	50
Q99816	Q99816	Tumor susceptibility gene 101 protein	TSG101	2.61542	-1.00301	43.944	24.541	28.4543	27.2911	28.2247	27.1595	28.3811	27.6005	-1	+	BicD2_Trbo_RFP-Trbo	11	11	11	2523500000	18	76
Q13451	Q13451	Peptidyl-prolyl cis-trans isomerase FKBP5;Peptidyl-prolyl cis-trans isomerase FKBP5, N-terminally processed	FKBP5	0.805353	-1.34533	51.212	10.987	25.1936	23.8304	25.6118	24.3028	27.0089	25.6452	-1			5	5	5	632330000	30	32
Q13492;O60641	Q13492	Phosphatidylinositol-binding clathrin assembly protein	PICALM	0.249744	0.335052	70.754	21.422	23.8026	24.4341	25.4424	25.1939	24.397	25.0192	-1			5	5	5	443090000	24	25
Q13501	Q13501	Sequestosome-1	SQSTM1	0.752105	-0.50514	47.687	20.579	26.3061	25.5857	26.9553	26.3266	26.3776	26.2113	-1			6	6	6	835570000	16	29
Q13523	Q13523	Serine/threonine-protein kinase PRP4 homolog	PRPF4B	1.01632	-1.91088	116.99	2.5388	24.9505	20.6712	23.4747	22.5151	22.6175	22.1236	-1			2	2	2	58739000	55	5
Q13526	Q13526	Peptidyl-prolyl cis-trans isomerase NIMA-interacting 1	PIN1	0.292445	-0.896964	18.243	16.868	24.3781	24.5899	25.3975	25.0941	23.969	21.3696	-1			3	3	3	341430000	11	12
Q13547	Q13547	Histone deacetylase 1	HDAC1	0.359717	-1.20714	55.102	2.2924	22.4687	20.0838	24.7373	24.3191	23.5614	22.743	-1			4	2	2	127870000	27	1
Q13557;Q9UQM7;Q13555;Q13554	Q13557;Q9UQM7;Q13555;Q13554	Calcium/calmodulin-dependent protein kinase type II subunit delta;Calcium/calmodulin-dependent protein kinase type II subunit alpha;Calcium/calmodulin-dependent protein kinase type II subunit gamma;Calcium/calmodulin-dependent protein kinase type II subunit beta	CAMK2D;CAMK2A;CAMK2G;CAMK2B	0.731056	-1.53405	56.369	2.7691	24.7585	21.6834	25.2457	24.223	25.2566	24.7523	-1			3	3	3	312260000	28	7
Q13561	Q13561	Dynactin subunit 2	DCTN2	0.399721	-0.116512	44.23	82.525	28.1944	27.8942	28.2806	28.0321	28.051	28.2501	-1			14	14	14	4029800000	26	153
Q13564	Q13564	NEDD8-activating enzyme E1 regulatory subunit	NAE1	1.04537	-1.45013	60.246	9.6125	25.9416	23.2437	26.2864	25.1471	25.5289	25.0157	-1			5	5	5	464640000	27	11
Q6UN15	Q6UN15	Pre-mRNA 3-end-processing factor FIP1	FIP1L1	1.37208	-1.00634	66.526	9.5216	25.8085	24.6278	26.39	24.8054	25.2692	25.0155	-1	+	BicD2_Trbo_RFP-Trbo	4	4	4	405210000	22	16
Q13573	Q13573	SNW domain-containing protein 1	SNW1	0.812633	-0.474852	61.494	19.844	26.1759	25.7469	26.5567	26.4042	26.4514	25.6085	-1			7	7	7	820250000	34	26
O60841	O60841	Eukaryotic translation initiation factor 5B	EIF5B	1.5191	-1.00966	138.83	115.57	28.0193	26.8391	28.6315	27.7008	28.2793	27.3612	-1	+	BicD2_Trbo_RFP-Trbo	20	20	20	2883600000	58	151
Q13595	Q13595	Transformer-2 protein homolog alpha	TRA2A	0.770351	-1.31345	32.688	15.324	24.7879	24.0701	26.9745	25.2711	26.6808	25.1617	-1			4	4	4	502470000	14	21
Q15437	Q15437	Protein transport protein Sec23B	SEC23B	1.87756	-1.00986	86.478	70.484	27.853	26.3276	27.7699	27.1084	27.7768	26.9342	-1	+	BicD2_Trbo_RFP-Trbo	11	11	9	1729800000	37	83
Q13610	Q13610	Periodic tryptophan protein 1 homolog	PWP1	0.705728	-1.32056	55.827	1.9808	22.6718	22.4133	23.3596	23.218	24.887	21.3254	-1			2	2	2	60950000	22	1
Q13616	Q13616	Cullin-1	CUL1	0.535602	-0.568299	89.677	28.57	26.062	25.1571	27.0128	26.1757	26.3094	26.3465	-1			12	12	12	964370000	52	46
Q13617	Q13617	Cullin-2	CUL2	0.61665	-1.24935	86.982	2.9937	23.9164	20.9121	21.7985	22.6745	24.0312	22.4115	-1			3	3	3	90801000	47	2
Q13618	Q13618	Cullin-3	CUL3	0.219297	-0.331303	88.929	4.3464	23.7949	22.1305	22.7936	22.832	23.2617	23.8937	-1			3	3	3	120060000	51	3
P63010	P63010	AP-2 complex subunit beta	AP2B1	2.50565	-1.01771	104.55	159.72	30.101	28.8527	30.2635	29.3019	30.1623	29.3191	-1	+	BicD2_Trbo_RFP-Trbo	30	30	16	9033900000	47	373
Q15942	Q15942	Zyxin	ZYX	2.37236	-1.01835	61.277	37.764	27.8055	26.8305	28.0296	27.1993	27.901	26.6513	-1	+	BicD2_Trbo_RFP-Trbo	9	9	9	1665200000	21	60
Q86UK7	Q86UK7	Zinc finger protein 598	ZNF598	2.71437	-1.02094	98.636	23.691	27.3865	26.1197	27.5026	26.5163	27.303	26.4934	-1	+	BicD2_Trbo_RFP-Trbo	16	16	16	1356500000	47	51
Q13685	Q13685	Angio-associated migratory cell protein	AAMP	0.0169489	-0.0339686	46.75	2.8831	23.1599	22.1236	23.517	23.969	23.67	24.1524	-1			2	2	2	168660000	16	1
Q13724	Q13724	Mannosyl-oligosaccharide glucosidase	MOGS	0.72995	-0.944784	91.916	5.7927	23.1662	22.3375	23.4963	23.1614	24.8706	23.1998	-1			4	4	4	184650000	42	16
Q7L2E3	Q7L2E3	Putative ATP-dependent RNA helicase DHX30	DHX30	2.23129	-1.02268	133.94	72.633	28.554	27.1519	28.2707	27.6427	28.6327	27.5947	-1	+	BicD2_Trbo_RFP-Trbo	27	27	27	3136800000	80	116
Q13823	Q13823	Nucleolar GTP-binding protein 2	GNL2	0.0440895	0.102938	83.654	1.7672	22.0314	21.1507	21.4348	22.8884	23.2399	22.9758	-1			1	1	1	34096000	40	1
Q13838	Q13838	Spliceosome RNA helicase DDX39B	DDX39B	0.244074	-0.246906	48.991	188.23	29.6265	29.1823	30.5127	30.189	29.9056	29.9327	-1			19	19	9	12672000000	26	339
P28482	P28482	Mitogen-activated protein kinase 1	MAPK1	1.36712	-1.02376	41.389	31.265	26.6661	25.0651	26.9555	25.7354	26.1121	25.8619	-1	+	BicD2_Trbo_RFP-Trbo	8	8	5	1026700000	23	39
Q13885	Q13885	Tubulin beta-2A chain	TUBB2A	0.481055	-1.1208	49.906	2.6472	23.9771	21.0058	24.3756	23.9257	24.0483	24.107	-1			21	1	1	171130000	21	12
Q6P1K8;Q13888	Q6P1K8;Q13888	General transcription factor IIH subunit 2-like protein;General transcription factor IIH subunit 2	GTF2H2C;GTF2H2	1.07894	-2.83659	44.452	5.3739	25.4013	23.9798	24.9118	22.9851	25.064	19.9024	-1			3	3	3	187750000	24	9
P29992;O95837	P29992	Guanine nucleotide-binding protein subunit alpha-11	GNA11	1.98337	-1.02433	42.123	25.061	26.6299	25.6833	27.0311	25.9422	27.2174	26.1799	-1	+	BicD2_Trbo_RFP-Trbo	9	9	5	1227200000	23	51
Q9Y333	Q9Y333	U6 snRNA-associated Sm-like protein LSm2	LSM2	1.32078	-1.02625	10.834	23.324	26.8978	25.4537	27.0817	26.6193	26.8516	25.6794	-1	+	BicD2_Trbo_RFP-Trbo	4	4	4	1101000000	7	57
Q13951	Q13951	Core-binding factor subunit beta	CBFB	0.356319	-0.650143	21.508	9.3597	23.4707	23.5705	25.4897	23.2499	23.0555	23.2452	-1			3	3	3	199560000	12	9
Q14004;Q9NYV4	Q14004;Q9NYV4	Cyclin-dependent kinase 13;Cyclin-dependent kinase 12	CDK13;CDK12	1.21477	-3.09245	164.92	2.7155	26.6027	21.2309	26.5456	23.2976	25.9731	25.3155	-1			3	2	2	524020000	76	3
Q14008	Q14008	Cytoskeleton-associated protein 5	CKAP5	0.733183	-0.28562	225.49	171.85	29.674	29.0585	29.5255	29.5221	29.7947	29.5569	-1			49	49	49	10460000000	122	377
Q14011	Q14011	Cold-inducible RNA-binding protein	CIRBP	0.57038	-1.21068	18.648	17.473	25.0421	23.1993	26.3158	26.1065	26.3498	24.77	-1			3	3	3	672240000	13	36
Q14012	Q14012	Calcium/calmodulin-dependent protein kinase type 1	CAMK1	0.0885685	0.110743	41.337	1.8309	22.696	22.0674	22.2723	22.1773	22.3363	23.3922	-1			2	2	2	74449000	19	5
Q14019	Q14019	Coactosin-like protein	COTL1	0.493387	0.49526	15.945	5.7104	24.3964	24.2429	24.4588	25.7161	24.3136	24.6956	-1			3	3	3	315120000	10	14
Q14061	Q14061	Cytochrome c oxidase copper chaperone	COX17	0.747061	-1.41835	6.9151	4.984	23.8674	23.3357	24.5666	21.0287	23.9127	23.7273	-1			1	1	1	181910000	4	8
Q14103	Q14103	Heterogeneous nuclear ribonucleoprotein D0	HNRNPD	0.516966	-0.499737	38.434	33.98	29.1609	28.0019	29.3978	29.3835	29.3858	29.0599	-1			8	8	7	7236600000	15	114
Q13200	Q13200	26S proteasome non-ATPase regulatory subunit 2	PSMD2	1.32742	-1.02813	100.2	76.437	28.755	27.2305	29.1877	28.3108	28.8411	28.1581	-1	+	BicD2_Trbo_RFP-Trbo	21	21	21	4238700000	56	195
Q14141	Q14141	Septin-6	SEPT6	0.335286	-0.69315	49.716	4.7904	24.3373	22.2994	24.7048	24.8797	23.3893	23.1728	-1			6	4	4	176350000	25	6
P30419;O60551	P30419	Glycylpeptide N-tetradecanoyltransferase 1	NMT1	1.34048	-1.02847	56.806	17.082	26.2992	25.0685	26.4477	25.3855	26.9052	26.1127	-1	+	BicD2_Trbo_RFP-Trbo	8	8	8	764330000	25	39
O14641	O14641	Segment polarity protein dishevelled homolog DVL-2	DVL2	2.27107	-1.02944	78.947	138.12	29.8922	29.1259	30.0427	28.6199	30.0798	29.1805	-1	+	BicD2_Trbo_RFP-Trbo	13	13	9	7484100000	32	198
Q14156	Q14156	Protein EFR3 homolog A	EFR3A	0.197954	-0.627618	92.923	11.287	25.7494	25.3006	25.2957	24.7131	23.1492	22.2977	-1			7	7	6	430040000	45	10
P43243	P43243	Matrin-3	MATR3	3.24236	-1.04163	94.622	169.83	29.8952	28.8764	30.1415	29.0047	29.8321	28.8628	-1	+	BicD2_Trbo_RFP-Trbo	23	23	22	7669800000	47	247
Q6IBS0	Q6IBS0	Twinfilin-2	TWF2	1.99945	-1.04504	39.548	16.436	27.1314	25.6752	26.9711	26.4007	26.948	25.8396	-1	+	BicD2_Trbo_RFP-Trbo	4	4	4	1015800000	23	27
O75122	O75122	CLIP-associating protein 2	CLASP2	1.45718	-1.04546	141.06	37.29	27.8264	26.6256	27.5975	26.3242	28.0271	27.3648	-1	+	BicD2_Trbo_RFP-Trbo	18	18	14	1915300000	84	93
Q14165	Q14165	Malectin	MLEC	0.233515	-0.870412	32.233	8.6194	24.4171	21.4132	25.9518	25.6765	24.8128	25.4808	-1			6	6	6	397640000	18	19
Q14166	Q14166	Tubulin--tyrosine ligase-like protein 12	TTLL12	0.466863	-0.581706	74.403	24.709	26.0599	24.4961	26.3568	25.8337	25.868	26.2098	-1			10	10	10	913240000	35	37
Q14181	Q14181	DNA polymerase alpha subunit B	POLA2	0.0893847	-0.169581	65.947	5.6147	24.3704	23.5124	22.5385	24.0961	24.4709	23.2624	-1			3	3	3	168820000	25	8
P62854;Q5JNZ5	P62854;Q5JNZ5	40S ribosomal protein S26;Putative 40S ribosomal protein S26-like 1	RPS26;RPS26P11	2.81936	-1.0536	13.015	25.102	29.6343	28.6301	29.9424	28.9356	29.7707	28.621	-1	+	BicD2_Trbo_RFP-Trbo	4	4	4	7402100000	6	95
Q14203	Q14203	Dynactin subunit 1	DCTN1	0.13691	0.150748	141.69	100.65	26.9372	27.2006	28.0971	27.8953	27.4986	27.8892	-1			23	23	23	2933000000	70	137
Q9NTJ3	Q9NTJ3	Structural maintenance of chromosomes protein 4	SMC4	1.35157	-1.05548	147.18	38.146	26.814	26.2985	28.0205	26.3967	27.6191	26.5919	-1	+	BicD2_Trbo_RFP-Trbo	21	21	21	1763900000	85	91
P35221	P35221	Catenin alpha-1	CTNNA1	1.8261	-1.05596	100.07	13.33	26.3538	25.2187	25.964	24.9163	26.5588	25.5737	-1	+	BicD2_Trbo_RFP-Trbo	10	10	6	704840000	56	25
Q14240	Q14240	Eukaryotic initiation factor 4A-II;Eukaryotic initiation factor 4A-II, N-terminally processed	EIF4A2	1.253	-1.5047	46.402	5.963	26.3445	23.2826	25.4926	24.6531	25.1729	24.5602	-1			11	3	3	419550000	23	13
Q92615	Q92615	La-related protein 4B	LARP4B	2.08881	-1.05867	80.551	93.035	27.4343	26.2619	27.4393	26.6469	27.1731	25.9619	-1	+	BicD2_Trbo_RFP-Trbo	13	13	13	1182200000	38	55
O60244;A6NLI5	O60244;A6NLI5	Mediator of RNA polymerase II transcription subunit 14;Putative tripartite motif-containing protein 64C	MED14;TRIM64C	2.33997	-1.06593	160.6	2.2414	28.5813	27.1197	28.4647	27.3915	28.3974	27.7344	-1	+	BicD2_Trbo_RFP-Trbo	2	2	2	5172400000	72	1
P61313	P61313	60S ribosomal protein L15	RPL15	2.54898	-1.06659	24.146	32.567	30.2194	28.9997	30.4923	29.4244	30.1365	29.2244	-1	+	BicD2_Trbo_RFP-Trbo	8	8	8	11355000000	14	119
P55769	P55769	NHP2-like protein 1;NHP2-like protein 1, N-terminally processed	NHP2L1	2.66211	-1.0675	14.173	13.966	25.2521	24.2278	25.5946	24.5212	25.6163	24.5115	-1	+	BicD2_Trbo_RFP-Trbo	4	4	4	480730000	9	23
Q9ULK4	Q9ULK4	Mediator of RNA polymerase II transcription subunit 23	MED23	1.44759	-1.06928	156.47	11.297	25.0497	24.7497	25.7056	24.1221	25.9984	24.6741	-1	+	BicD2_Trbo_RFP-Trbo	9	9	9	324840000	76	14
Q14318	Q14318	Peptidyl-prolyl cis-trans isomerase FKBP8	FKBP8	0.0180251	-0.025074	44.561	10.675	25.233	25.1684	26.309	26.0815	25.163	25.3799	-1			6	6	6	602500000	20	23
Q14320;Q9Y247	Q14320	Protein FAM50A	FAM50A	0.757515	-1.08248	40.241	5.4988	25.8105	23.6785	26.1819	25.8004	26.1009	25.3669	-1			4	4	4	535720000	23	21
O15400	O15400	Syntaxin-7	STX7	1.53137	-1.06932	29.815	7.3322	24.9786	23.8222	24.8141	23.1388	24.2678	23.8914	-1	+	BicD2_Trbo_RFP-Trbo	3	3	3	264450000	13	13
Q9NSV4	Q9NSV4	Protein diaphanous homolog 3	DIAPH3	3.92931	-1.06959	136.92	169.71	29.3238	28.4414	29.4102	28.2503	29.4766	28.3101	-1	+	BicD2_Trbo_RFP-Trbo	32	32	32	5884500000	69	271
P62877	P62877	E3 ubiquitin-protein ligase RBX1;E3 ubiquitin-protein ligase RBX1, N-terminally processed	RBX1	2.74374	-1.0704	12.274	4.3458	25.6573	24.4473	25.9084	24.8129	25.7355	24.8299	-1	+	BicD2_Trbo_RFP-Trbo	2	2	2	484250000	4	18
Q14558	Q14558	Phosphoribosyl pyrophosphate synthase-associated protein 1	PRPSAP1	0.083062	-0.146616	39.393	6.7821	24.6981	23.4297	24.9862	25.2935	23.9284	24.4495	-1			6	5	5	310380000	24	11
Q14566	Q14566	DNA replication licensing factor MCM6	MCM6	0.895997	-1.01657	92.888	33.258	26.9242	25.393	27.6647	27.0606	27.1458	26.2313	-1			14	14	14	1568100000	57	73
Q9H2G2;O94804	Q9H2G2	STE20-like serine/threonine-protein kinase	SLK	3.63913	-1.07207	142.69	154.69	29.7676	28.6413	29.8723	28.6501	29.7378	28.87	-1	+	BicD2_Trbo_RFP-Trbo	31	31	31	6303600000	71	268
Q14671;Q8TB72	Q14671	Pumilio homolog 1	PUM1	1.23567	-1.04367	126.47	6.9432	25.6928	23.9513	25.8177	25.1477	25.186	24.4666	-1			5	5	5	349810000	44	9
Q9Y2T2	Q9Y2T2	AP-3 complex subunit mu-1	AP3M1	3.72546	-1.07392	46.939	160.84	29.4777	28.3378	29.5805	28.3901	29.469	28.5776	-1	+	BicD2_Trbo_RFP-Trbo	17	17	15	5313600000	23	198
Q14678	Q14678	KN motif and ankyrin repeat domain-containing protein 1	KANK1	0.530185	0.117786	147.29	108.3	28.8288	28.8618	28.6403	29.0236	28.9098	28.8469	-1			27	27	26	5025000000	68	171
Q93009	Q93009	Ubiquitin carboxyl-terminal hydrolase 7	USP7	1.49322	-1.07579	128.3	68.977	27.8306	26.8091	28.5071	26.9614	28.3295	27.6694	-1	+	BicD2_Trbo_RFP-Trbo	26	26	26	2515800000	66	107
P63208	P63208	S-phase kinase-associated protein 1	SKP1	2.97685	-1.07675	18.658	79.227	28.3399	27.0535	28.3638	27.4871	28.3046	27.2374	-1	+	BicD2_Trbo_RFP-Trbo	8	8	8	2585000000	12	66
Q96HS1	Q96HS1	Serine/threonine-protein phosphatase PGAM5, mitochondrial	PGAM5	2.89633	-1.08177	32.004	34.376	28.674	27.4283	28.4605	27.6251	28.4169	27.2526	-1	+	BicD2_Trbo_RFP-Trbo	11	11	11	2799800000	18	97
P31350	P31350	Ribonucleoside-diphosphate reductase subunit M2	RRM2	4.76249	-1.0819	44.877	59.732	28.6878	27.6977	28.6904	27.6202	28.7934	27.6079	-1	+	BicD2_Trbo_RFP-Trbo	16	16	14	3216500000	27	138
Q14697	Q14697	Neutral alpha-glucosidase AB	GANAB	0.286541	-0.379788	106.87	140.04	28.8425	28.1545	29.8732	29.6851	29.2124	28.9491	-1			22	22	22	7210700000	50	241
Q14699	Q14699	Raftlin	RFTN1	0.92976	-1.32599	63.145	5.5636	24.0914	23.7446	24.6165	24.086	25.4005	22.2999	-1			4	4	4	317770000	29	7
Q14738;Q13362	Q14738;Q13362	Serine/threonine-protein phosphatase 2A 56 kDa regulatory subunit delta isoform;Serine/threonine-protein phosphatase 2A 56 kDa regulatory subunit gamma isoform	PPP2R5D;PPP2R5C	0.713861	-0.857443	69.991	3.4183	23.7724	22.3434	24.4987	24.0918	23.9888	23.2524	-1			3	3	3	199260000	31	14
Q16513	Q16513	Serine/threonine-protein kinase N2	PKN2	2.66323	-1.08327	112.03	68.911	28.069	27.0395	28.3241	26.94	28.2228	27.3867	-1	+	BicD2_Trbo_RFP-Trbo	26	26	25	3042100000	62	147
Q9Y266	Q9Y266	Nuclear migration protein nudC	NUDC	1.71208	-1.08438	38.242	133.14	30.8059	29.302	31.0278	30.2042	30.9769	30.0513	-1	+	BicD2_Trbo_RFP-Trbo	17	17	17	13963000000	23	315
Q14839;Q8TDI0;Q12873	Q14839	Chromodomain-helicase-DNA-binding protein 4	CHD4	0.153168	-0.238175	218	17.27	25.2969	25.3253	27.0498	26.1714	26.0318	26.1673	-1			13	13	13	945990000	98	33
Q14847	Q14847	LIM and SH3 domain protein 1	LASP1	1.09187	-0.844486	29.717	11.033	25.872	25.1668	26.3224	25.9779	26.3705	24.8868	-1			3	3	3	637460000	16	24
Q14872	Q14872	Metal regulatory transcription factor 1	MTF1	0.159533	0.286453	80.956	2.5157	22.3834	23.9757	24.3759	24.1221	24.4185	23.9394	-1			1	1	1	135560000	18	6
Q9NZZ3	Q9NZZ3	Charged multivesicular body protein 5	CHMP5	2.48572	-1.08473	24.57	6.3489	25.9578	24.7633	26.2204	24.8106	25.7928	25.1429	-1	+	BicD2_Trbo_RFP-Trbo	3	3	3	445640000	8	26
Q14978	Q14978	Nucleolar and coiled-body phosphoprotein 1	NOLC1	0.0390281	0.0845203	73.602	5.6832	22.426	23.6402	24.7563	23.2377	23.6958	24.2539	-1			4	4	4	218810000	45	20
Q14C86	Q14C86	GTPase-activating protein and VPS9 domain-containing protein 1	GAPVD1	0.279402	0.130215	164.98	51.491	27.3056	27.2947	27.2135	27.5198	27.6536	27.7488	-1			18	18	18	2171700000	74	110
Q14CX7	Q14CX7	N-alpha-acetyltransferase 25, NatB auxiliary subunit	NAA25	0.149526	-0.589818	112.29	5.9895	22.3534	20.6196	24.9157	24.8047	23.8006	23.876	-1			4	4	4	157370000	55	5
Q15003	Q15003	Condensin complex subunit 2	NCAPH	0.348044	-0.901843	82.562	8.723	23.9193	24.7732	27.0749	25.7777	26.3032	24.0408	-1			7	7	7	702160000	37	12
Q15008	Q15008	26S proteasome non-ATPase regulatory subunit 6	PSMD6	0.687313	-0.443052	45.531	44.435	27.6025	26.7902	27.7195	27.53	27.9856	27.6583	-1			14	14	14	2284500000	29	88
Q93008;O00507	Q93008;O00507	Probable ubiquitin carboxyl-terminal hydrolase FAF-X;Probable ubiquitin carboxyl-terminal hydrolase FAF-Y	USP9X;USP9Y	1.43015	-1.08494	290.46	37.88	27.3956	25.8736	27.9052	26.5747	27.2678	26.8654	-1	+	BicD2_Trbo_RFP-Trbo	29	29	29	1974000000	132	67
P62879;Q9BRK4	P62879	Guanine nucleotide-binding protein G(I)/G(S)/G(T) subunit beta-2	GNB2	3.04477	-1.08654	37.331	263.26	29.4374	28.5513	29.7757	28.407	29.661	28.6562	-1	+	BicD2_Trbo_RFP-Trbo	14	8	5	7871200000	13	194
Q15020	Q15020	Squamous cell carcinoma antigen recognized by T-cells 3	SART3	1.17163	-1.25129	109.93	14.411	25.2994	24.9952	26.2783	25.1146	26.155	23.8691	-1			6	6	6	472600000	57	12
Q15021;REV__Q02790	Q15021	Condensin complex subunit 1	NCAPD2	0.380423	-0.321594	157.18	20.522	26.7502	26.0948	27.2641	27.0422	26.5132	26.4258	-1			14	14	14	1398800000	87	45
Q15024	Q15024	Exosome complex component RRP42	EXOSC7	0.124585	-0.42063	31.821	3.7367	25.0602	23.6487	21.3758	22.3997	24.5955	23.7213	-1			3	3	3	124650000	20	3
Q9H098	Q9H098	Protein FAM107B	FAM107B	1.65467	-1.0891	15.558	1.8611	22.972	22.1764	23.5443	22.629	23.3214	21.765	-1	+	BicD2_Trbo_RFP-Trbo	1	1	1	59096000	10	1
Q9BWJ5	Q9BWJ5	Splicing factor 3B subunit 5	SF3B5	2.08402	-1.09169	10.135	54.79	28.3337	26.9883	28.631	27.695	28.3847	27.3911	-1	+	BicD2_Trbo_RFP-Trbo	4	4	4	2250700000	6	88
Q9NP79	Q9NP79	Vacuolar protein sorting-associated protein VTA1 homolog	VTA1	2.70472	-1.0926	33.879	4.6819	25.4113	24.0206	25.4306	24.4136	25.1207	24.2506	-1	+	BicD2_Trbo_RFP-Trbo	3	3	3	300570000	13	13
Q15046	Q15046	Lysine--tRNA ligase	KARS	0.063628	-0.0615031	68.047	38.973	27.1302	26.9469	27.9465	27.6613	27.2793	27.5633	-1			14	14	14	1952600000	31	83
O15226	O15226	NF-kappa-B-repressing factor	NKRF	1.54074	-1.10207	77.672	2.8202	24.4319	23.4193	24.7814	24.0516	24.5361	22.9722	-1	+	BicD2_Trbo_RFP-Trbo	2	2	2	200000000	46	4
Q8N3C0	Q8N3C0	Activating signal cointegrator 1 complex subunit 3	ASCC3	5.49537	-1.10571	251.46	323.31	32.7543	31.6064	32.6595	31.577	32.704	31.6172	-1	+	BicD2_Trbo_RFP-Trbo	90	90	90	55285000000	127	1303
Q15056	Q15056	Eukaryotic translation initiation factor 4H	EIF4H	0.793627	-0.881204	27.385	20.132	27.184	26.2823	27.8247	27.4591	27.2657	25.8894	-1			3	3	3	1728400000	21	42
O00571;O15523;Q9NQI0	O00571;O15523	ATP-dependent RNA helicase DDX3X;ATP-dependent RNA helicase DDX3Y	DDX3X;DDX3Y	4.28127	-1.10585	73.243	276.89	30.7985	29.6042	30.8689	29.7808	30.7741	29.739	-1	+	BicD2_Trbo_RFP-Trbo	27	26	26	14106000000	40	283
Q15075	Q15075	Early endosome antigen 1	EEA1	0.0629998	-0.127666	162.46	3.0307	21.8401	20.0212	21.3991	22.23	20.904	21.5091	-1			3	3	3	44379000	108	4
Q15084	Q15084	Protein disulfide-isomerase A6	PDIA6	0.3358	-0.196945	48.121	68.94	27.7612	27.2728	27.9711	28.0842	27.8904	27.6748	-1			11	11	11	3631000000	25	151
Q15102	Q15102	Platelet-activating factor acetylhydrolase IB subunit gamma	PAFAH1B3	0.126613	-0.209065	25.734	26.479	26.432	25.7575	27.4845	27.5556	26.7966	26.7728	-1			7	7	7	1583000000	16	55
Q15121	Q15121	Astrocytic phosphoprotein PEA-15	PEA15	0.502323	-1.29559	15.04	7.4363	25.5315	23.1444	24.2243	22.5086	21.8357	22.0516	-1			3	3	3	165180000	8	15
Q15149	Q15149	Plectin	PLEC	1.05175	-1.03084	531.78	6.3249	22.2716	21.2147	22.1618	21.3436	23.3178	22.1005	-1			11	8	8	84824000	341	7
Q92572	Q92572	AP-3 complex subunit sigma-1	AP3S1	2.39542	-1.10937	21.732	23.705	27.727	26.5933	27.8254	26.9622	27.6697	26.3384	-1	+	BicD2_Trbo_RFP-Trbo	6	6	6	1492700000	10	80
Q15181	Q15181	Inorganic pyrophosphatase	PPA1	0.154808	-0.183381	32.66	246.85	29.8893	29.1294	30.3866	30.5445	29.8702	29.9221	-1			15	15	15	13388000000	20	308
Q15185	Q15185	Prostaglandin E synthase 3	PTGES3	0.190114	-0.199727	18.697	116.51	29.229	28.6224	29.8296	29.8598	29.3716	29.3488	-1			6	6	6	8806900000	9	135
Q15233	Q15233	Non-POU domain-containing octamer-binding protein	NONO	1.11938	-0.885583	54.231	106.22	29.4131	28.0839	29.9589	29.1184	29.5303	29.0433	-1			13	13	12	6984000000	25	244
Q15257	Q15257	Serine/threonine-protein phosphatase 2A activator	PPP2R4	0.409782	-0.337876	40.667	2.223	22.8461	22.2858	23.5506	23.2347	23.1216	22.9842	-1			1	1	1	117350000	23	9
Q15269	Q15269	Periodic tryptophan protein 2 homolog	PWP2	1.14025	-1.92921	102.45	2.2779	23.7288	20.1613	23.1801	22.112	21.887	20.7351	-1			2	2	2	35702000	46	3
Q15276	Q15276	Rab GTPase-binding effector protein 1	RABEP1	0.198604	-0.48544	99.289	3.1265	22.148	20.5124	22.3327	23.5349	22.0273	21.0044	-1			4	4	4	65206000	62	5
Q15286	Q15286	Ras-related protein Rab-35	RAB35	0.857306	-1.19508	23.025	12.443	25.0395	23.0854	25.8441	24.9019	25.5772	24.8882	-1			4	4	4	459090000	15	26
P46939	P46939	Utrophin	UTRN	1.47269	-1.11449	394.46	4.5297	26.444	25.4561	26.6375	25.8658	26.2984	24.7146	-1	+	BicD2_Trbo_RFP-Trbo	6	6	6	687650000	210	7
Q15293	Q15293	Reticulocalbin-1	RCN1	0.340541	-0.370546	38.89	23.607	25.8987	25.6819	26.9679	26.7439	26.5643	25.8934	-1			6	6	6	1034700000	15	51
Q15311	Q15311	RalA-binding protein 1	RALBP1	0.541254	-1.46035	76.063	1.5828	23.9143	20.799	24.7893	21.8297	22.3132	24.0071	-1			1	1	1	69024000	41	1
P57737	P57737	Coronin-7	CORO7	3.01237	-1.11815	100.6	278.47	31.1364	29.8661	31.278	30.2806	31.1363	30.0496	-1	+	BicD2_Trbo_RFP-Trbo	24	24	24	16845000000	35	343
Q15363	Q15363	Transmembrane emp24 domain-containing protein 2	TMED2	0.0660816	0.148329	22.761	2.2226	23.1301	22.648	24.4326	25.0021	23.7471	24.1047	-1			1	1	1	204030000	11	11
Q9H8T0	Q9H8T0	AKT-interacting protein	AKTIP	1.39161	-1.12227	33.128	2.2343	23.682	21.6336	23.2989	22.3469	23.1872	22.8207	-1	+	BicD2_Trbo_RFP-Trbo	1	1	1	64819000	17	1
Q86UW6	Q86UW6	NEDD4-binding protein 2	N4BP2	1.57222	-1.12418	198.8	3.7608	25.4079	23.7541	25.4871	24.5186	25.5984	24.8481	-1	+	BicD2_Trbo_RFP-Trbo	4	4	4	580660000	82	4
Q15369	Q15369	Transcription elongation factor B polypeptide 1	TCEB1	0.087583	-0.102542	12.473	51.751	25.0448	25.7568	26.2947	25.9419	26.074	25.4071	-1			3	3	3	752710000	8	33
Q15370	Q15370	Transcription elongation factor B polypeptide 2	TCEB2	0.544185	-0.296317	13.133	13.088	26.5056	26.0654	26.3164	26.4992	26.9992	26.3676	-1			5	5	5	1214700000	7	51
Q13442	Q13442	28 kDa heat- and acid-stable phosphoprotein	PDAP1	2.22599	-1.12535	20.63	33.676	28.0142	26.6547	28.3267	27.26	28.133	27.1832	-1	+	BicD2_Trbo_RFP-Trbo	5	5	5	2113000000	10	52
Q15388	Q15388	Mitochondrial import receptor subunit TOM20 homolog	TOMM20	0.732244	-1.40285	16.298	3.6038	25.7107	22.8463	26.025	25.1451	24.1877	23.7235	-1			2	2	2	402160000	6	18
O60306	O60306	Intron-binding protein aquarius	AQR	2.45718	-1.12593	171.29	44.591	27.3885	26.3884	27.5485	26.0648	27.5598	26.6659	-1	+	BicD2_Trbo_RFP-Trbo	19	19	18	1271700000	78	59
Q15398	Q15398	Disks large-associated protein 5	DLGAP5	0.39897	-0.471488	95.114	5.586	23.5379	23.7351	24.9357	23.6898	24.7781	24.4123	-1			7	7	7	185210000	56	7
P52294	P52294	Importin subunit alpha-5;Importin subunit alpha-5, N-terminally processed	KPNA1	1.6176	-1.12685	60.221	4.2665	24.6026	23.3872	24.48	23.9851	24.5596	22.8894	-1	+	BicD2_Trbo_RFP-Trbo	6	2	2	176360000	22	8
P62266	P62266	40S ribosomal protein S23	RPS23	2.47598	-1.12829	15.807	62.398	30.2069	29.117	30.5533	29.5252	30.6526	29.3856	-1	+	BicD2_Trbo_RFP-Trbo	6	6	6	11217000000	8	127
Q15427	Q15427	Splicing factor 3B subunit 4	SF3B4	0.557451	-1.97374	44.385	23.533	25.8367	22.1789	27.2685	25.5023	23.2199	22.7226	-1			4	4	4	419280000	14	20
Q15428	Q15428	Splicing factor 3A subunit 2	SF3A2	0.314985	0.698965	49.255	2.7047	24.0599	25.2365	22.131	24.1887	24.5274	23.3899	-1			4	4	4	223950000	16	8
P23588	P23588	Eukaryotic translation initiation factor 4B	EIF4B	2.72466	-1.12845	69.15	83.337	30.1251	28.7943	30.3253	29.159	30.148	29.2596	-1	+	BicD2_Trbo_RFP-Trbo	14	14	14	7799400000	34	183
P35611	P35611	Alpha-adducin	ADD1	1.69789	-1.12915	80.954	75.63	27.186	26.3187	27.7619	26.8943	27.7857	26.133	-1	+	BicD2_Trbo_RFP-Trbo	11	11	10	1625600000	32	73
Q15459	Q15459	Splicing factor 3A subunit 1	SF3A1	0.615522	-0.736433	88.885	22.957	26.6458	25.5564	27.7122	26.9559	27.1443	26.7807	-1			12	12	12	1532100000	40	63
Q15477	Q15477	Helicase SKI2W	SKIV2L	1.24369	-1.10967	137.75	6.5322	25.1839	24.5057	25.7181	23.4752	24.8375	24.4296	-1			5	5	5	344400000	63	10
Q6PKG0	Q6PKG0	La-related protein 1	LARP1	3.11364	-1.13002	123.51	215.75	30.4077	29.2131	30.6593	29.541	30.5384	29.4613	-1	+	BicD2_Trbo_RFP-Trbo	35	35	31	10848000000	67	335
Q15555	Q15555	Microtubule-associated protein RP/EB family member 2	MAPRE2	0.660846	-0.492617	37.031	9.1539	25.5704	24.7647	24.7186	24.6987	25.7386	25.0864	-1			4	4	4	400800000	18	17
Q15650	Q15650	Activating signal cointegrator 1	TRIP4	3.20407	-1.13108	66.145	262.34	30.123	28.8286	29.8576	28.8393	29.7709	28.6904	-1	+	BicD2_Trbo_RFP-Trbo	21	21	21	8006000000	32	285
Q15637	Q15637	Splicing factor 1	SF1	0.854017	-0.765616	68.329	39.004	26.9309	25.5184	27.252	26.8899	26.8491	26.3268	-1			7	7	7	1227000000	16	49
Q15643	Q15643	Thyroid receptor-interacting protein 11	TRIP11	0.166471	-0.157873	227.58	1.9822	23.1474	23.3073	22.5369	22.6223	22.9759	22.257	-1			4	4	4	37225000	137	1
Q15645	Q15645	Pachytene checkpoint protein 2 homolog	TRIP13	0.540709	-0.422427	48.55	18	27.2285	26.3596	27.6188	27.1726	26.7451	26.7929	-1			10	10	10	1538100000	25	62
P25205	P25205	DNA replication licensing factor MCM3	MCM3	1.35396	-1.13266	90.98	67.17	28.5334	26.7484	28.8881	27.6893	28.0359	27.6218	-1	+	BicD2_Trbo_RFP-Trbo	27	27	27	3522500000	56	185
Q15654	Q15654	Thyroid receptor-interacting protein 6	TRIP6	0.408953	-0.235456	50.287	71.351	27.4822	27.541	28.1535	27.9061	28.1006	27.5828	-1			13	13	13	2611900000	26	90
P26196	P26196	Probable ATP-dependent RNA helicase DDX6	DDX6	3.0092	-1.13519	54.416	191.58	30.0486	28.7513	30.2393	29.1207	30.0096	29.02	-1	+	BicD2_Trbo_RFP-Trbo	19	19	19	7971100000	29	263
Q15691;Q9UPY8	Q15691	Microtubule-associated protein RP/EB family member 1	MAPRE1	1.05306	-0.746579	29.999	135.53	28.6038	27.4088	28.9573	28.0815	28.0389	27.8699	-1			9	9	9	3565600000	18	116
Q15717	Q15717	ELAV-like protein 1	ELAVL1	0.505958	-0.472974	36.091	35.109	27.459	27.1666	28.6972	27.7289	27.7805	27.6223	-1			8	8	8	2345200000	17	79
Q15738	Q15738	Sterol-4-alpha-carboxylate 3-dehydrogenase, decarboxylating	NSDHL	0.359861	-0.80181	41.9	7.5129	22.4936	22.218	24.8425	24.109	24.6363	23.24	-1			4	4	4	191310000	25	3
P46779	P46779	60S ribosomal protein L28	RPL28	2.56158	-1.13636	15.747	15.429	29.1562	27.8405	29.1354	27.8657	29.1912	28.3675	-1	+	BicD2_Trbo_RFP-Trbo	6	6	6	4718000000	11	69
Q15758	Q15758	Neutral amino acid transporter B(0)	SLC1A5	0.0980294	-0.0632445	56.598	22.072	26.5725	26.448	26.668	26.6422	27.0742	27.0348	-1			7	7	7	1264300000	17	50
Q15785	Q15785	Mitochondrial import receptor subunit TOM34	TOMM34	0.708464	-1.28857	34.559	13.486	24.9424	22.5818	25.6746	25.3399	25.424	24.2536	-1			4	4	4	425020000	21	23
Q15813	Q15813	Tubulin-specific chaperone E	TBCE	1.24177	-1.04766	59.345	45.7	26.497	25.4093	27.2873	25.4962	26.6566	26.3924	-1			10	10	10	1064400000	37	68
Q15819	Q15819	Ubiquitin-conjugating enzyme E2 variant 2	UBE2V2	0.0193771	-0.0513458	16.363	21.045	25.1655	26.0553	27.828	27.3834	27.0129	26.4136	-1			7	7	2	1569900000	12	54
Q15843	Q15843	NEDD8	NEDD8	0.118776	-0.131542	9.0714	9.2051	26.6189	25.8642	26.613	26.0509	25.5179	26.4401	-1			2	2	2	1007100000	7	29
Q15904	Q15904	V-type proton ATPase subunit S1	ATP6AP1	0.737519	-0.401405	52.025	4.7235	25.1283	25.2766	25.7048	24.7925	25.7043	25.264	-1			3	3	3	418950000	20	22
Q15907;P62491	Q15907;P62491	Ras-related protein Rab-11B;Ras-related protein Rab-11A	RAB11B;RAB11A	0.38887	-0.273047	24.488	17.927	27.3023	26.9067	27.8299	27.7674	27.5445	27.1836	-1			10	10	10	2315400000	16	75
Q8NC51	Q8NC51	Plasminogen activator inhibitor 1 RNA-binding protein	SERBP1	2.14461	-1.14063	44.965	209.33	30.7796	29.3195	31.0041	30.0341	30.8552	29.8634	-1	+	BicD2_Trbo_RFP-Trbo	16	16	16	14738000000	23	275
Q8NEZ2	Q8NEZ2	Vacuolar protein sorting-associated protein 37A	VPS37A	2.3587	-1.14162	44.314	27.656	27.8875	26.5102	28.0611	26.6713	27.4656	26.8078	-1	+	BicD2_Trbo_RFP-Trbo	8	8	8	1564600000	17	51
Q16186	Q16186	Proteasomal ubiquitin receptor ADRM1	ADRM1	0.150711	-0.39514	42.153	15.141	25.7434	23.4205	25.8373	26.5833	25.6467	26.0381	-1			4	4	4	722630000	12	50
Q16204	Q16204	Coiled-coil domain-containing protein 6	CCDC6	0.541342	-1.66256	53.29	8.9972	24.5429	24.6166	25.8865	21.0218	25.3589	25.1623	-1			5	5	5	350510000	23	16
Q16222	Q16222	UDP-N-acetylhexosamine pyrophosphorylase;UDP-N-acetylgalactosamine pyrophosphorylase;UDP-N-acetylglucosamine pyrophosphorylase	UAP1	0.0609796	-0.13547	58.768	2.9634	23.6228	23.4415	25.6801	24.8526	24.278	24.8804	-1			3	3	2	294110000	36	5
P06730	P06730	Eukaryotic translation initiation factor 4E	EIF4E	2.3829	-1.144	25.097	79.524	28.3883	26.7898	28.3422	27.29	28.1216	27.3404	-1	+	BicD2_Trbo_RFP-Trbo	7	7	7	2278900000	14	80
Q9UN37	Q9UN37	Vacuolar protein sorting-associated protein 4A	VPS4A	1.78	-1.14696	48.897	4.7641	25.7845	24.2224	25.9164	25.09	26.0669	25.0144	-1	+	BicD2_Trbo_RFP-Trbo	6	6	4	549240000	28	18
Q8N6H7	Q8N6H7	ADP-ribosylation factor GTPase-activating protein 2	ARFGAP2	2.08959	-1.14811	56.72	27.984	26.6125	25.4443	27.1912	25.7595	26.8582	26.0138	-1	+	BicD2_Trbo_RFP-Trbo	7	7	7	911180000	32	47
Q16527	Q16527	Cysteine and glycine-rich protein 2	CSRP2	0.165949	-0.140738	20.954	2.5589	24.3422	24.0961	24.9897	24.8919	24.8696	24.7912	-1			1	1	1	270560000	13	11
Q16531	Q16531	DNA damage-binding protein 1	DDB1	0.305654	0.228094	126.97	61.68	27.9181	28.0209	28.6392	28.6909	28.0181	28.548	-1			24	24	24	4034200000	53	150
Q16540	Q16540	39S ribosomal protein L23, mitochondrial	MRPL23	0.820423	-2.19389	17.781	6.851	24.4214	20.5416	25.7503	22.5799	23.9232	24.3917	-1			3	3	3	273200000	10	17
Q16543	Q16543	Hsp90 co-chaperone Cdc37;Hsp90 co-chaperone Cdc37, N-terminally processed	CDC37	0.605677	-0.456035	44.468	35.124	27.6243	26.6436	27.7774	27.7993	27.7046	27.2952	-1			7	7	7	2247900000	19	75
Q9NW64	Q9NW64	Pre-mRNA-splicing factor RBM22	RBM22	1.37095	-1.15047	46.895	18.486	24.4192	22.7705	23.3145	22.9851	24.5058	23.0324	-1	+	BicD2_Trbo_RFP-Trbo	3	3	3	126080000	26	6
Q16563	Q16563	Synaptophysin-like protein 1	SYPL1	0.886068	-1.10688	28.565	5.9371	24.723	22.9315	25.525	24.6768	25.0021	24.3212	-1			3	3	3	426010000	11	25
Q16576	Q16576	Histone-binding protein RBBP7	RBBP7	0.90694	-0.766085	47.82	323.31	29.8589	28.5504	30.1833	29.8702	29.9076	29.2308	-1			16	16	11	10040000000	16	243
Q16625	Q16625	Occludin	OCLN	1.06579	0.545928	59.143	2.8943	23.8203	23.9652	23.7065	24.5897	24.0433	24.653	-1			3	3	3	182810000	18	4
Q16626	Q16626	Male-enhanced antigen 1	MEA1	0.136862	0.274131	19.904	2.1654	22.0551	22.6015	23.8773	23.8655	22.1705	22.4582	-1			1	1	1	72225000	5	3
Q6ZVM7	Q6ZVM7	TOM1-like protein 2	TOM1L2	3.01955	-1.15071	55.556	5.8817	25.4518	24.4646	25.5131	24.1178	25.5898	24.5202	-1	+	BicD2_Trbo_RFP-Trbo	5	5	5	505720000	22	12
Q13045	Q13045	Protein flightless-1 homolog	FLII	2.60331	-1.15298	144.75	79.551	28.7668	27.8822	28.8486	27.8314	28.9225	27.3654	-1	+	BicD2_Trbo_RFP-Trbo	25	25	25	3640000000	68	165
Q16637	Q16637	Survival motor neuron protein	SMN1	0.552402	-0.734102	31.848	5.8503	24.8124	23.7725	23.5226	22.9555	24.8841	24.2888	-1			3	3	3	205150000	11	10
Q16643	Q16643	Drebrin	DBN1	0.130237	-0.338803	71.428	3.0703	22.3293	21.7098	22.8186	23.5596	24.7159	23.578	-1			3	3	3	130280000	25	2
Q16658	Q16658	Fascin	FSCN1	0.269396	-0.437394	54.529	19.663	25.5301	24.5382	26.7764	25.8441	25.6089	26.2208	-1			9	9	9	910380000	29	56
Q16718	Q16718	NADH dehydrogenase [ubiquinone] 1 alpha subcomplex subunit 5	NDUFA5	0.619526	-1.00777	13.459	18.805	25.5175	25.1938	26.3324	25.9155	25.8582	23.5754	-1			4	4	4	606180000	7	23
Q16740	Q16740	ATP-dependent Clp protease proteolytic subunit, mitochondrial	CLPP	0.347895	0.98023	30.18	9.2233	23.5988	22.8261	24.1334	24.0915	20.7321	24.4874	-1			2	2	2	182980000	16	11
Q16775	Q16775	Hydroxyacylglutathione hydrolase, mitochondrial	HAGH	0.20791	-0.582477	33.805	2.4572	24.6754	21.2744	22.3082	23.9035	22.4074	22.4656	-1			3	3	3	97051000	18	7
Q16795	Q16795	NADH dehydrogenase [ubiquinone] 1 alpha subcomplex subunit 9, mitochondrial	NDUFA9	0.0486938	0.0507202	42.509	7.2462	24.4463	25.323	25.4808	24.6986	24.7958	24.8534	-1			5	5	5	401300000	28	11
Q16836	Q16836	Hydroxyacyl-coenzyme A dehydrogenase, mitochondrial	HADH	0.275195	-0.853437	34.293	13.997	23.5626	22.028	25.9752	25.2321	25.2109	24.9283	-1			3	3	3	466820000	19	17
Q16851	Q16851	UTP--glucose-1-phosphate uridylyltransferase	UGP2	0.144835	0.261304	56.94	6.3348	21.9482	23.2998	23.1844	23.8436	23.9831	22.7562	-1			3	3	3	186080000	31	7
Q16881	Q16881	Thioredoxin reductase 1, cytoplasmic	TXNRD1	0.579256	-0.68582	70.905	10.228	25.2117	24.2572	26.4234	25.2564	25.3612	25.4252	-1			5	5	4	437290000	38	14
Q16891	Q16891	MICOS complex subunit MIC60	IMMT	0.865836	-0.868836	83.677	42.375	27.0125	25.5823	27.6925	26.9415	26.9587	26.5335	-1			17	17	17	2177500000	51	74
O00567	O00567	Nucleolar protein 56	NOP56	2.30785	-1.15365	66.049	33.002	26.772	25.8197	27.3944	25.9144	27.1686	26.14	-1	+	BicD2_Trbo_RFP-Trbo	13	13	13	1394100000	36	65
Q1KMD3	Q1KMD3	Heterogeneous nuclear ribonucleoprotein U-like protein 2	HNRNPUL2	0.443518	-1.20583	85.104	5.5188	24.1926	24.2833	25.1252	24.302	23.8629	20.9779	-1			3	3	3	141540000	41	3
Q9BU76	Q9BU76	Multiple myeloma tumor-associated protein 2	MMTAG2	1.99977	-1.15395	29.411	33.229	27.4394	26.8146	28.0868	26.7841	28.2579	26.7236	-1	+	BicD2_Trbo_RFP-Trbo	8	8	8	1382600000	17	38
Q27J81	Q27J81	Inverted formin-2	INF2	0.0711226	-0.246881	135.62	11.762	23.7627	20.7966	22.5688	23.9181	23.6459	24.5221	-1			5	5	5	108380000	57	5
Q2M1P5;O75037	Q2M1P5	Kinesin-like protein KIF7	KIF7	0.295977	-0.520987	150.59	8.4678	24.4126	24.2689	24.4807	24.5006	23.7951	22.356	-1			7	7	6	295700000	86	13
Q8IZH2	Q8IZH2	5-3 exoribonuclease 1	XRN1	2.03952	-1.15574	194.1	64.055	28.3066	26.9015	28.3784	27.663	28.6567	27.3099	-1	+	BicD2_Trbo_RFP-Trbo	24	24	24	2784400000	83	129
Q2M389	Q2M389	WASH complex subunit 7	KIAA1033	0.721435	-1.23248	136.4	3.0585	24.5463	22.6483	23.2884	22.5452	22.3244	21.2683	-1			3	3	3	51501000	74	3
Q2NKX8	Q2NKX8	DNA excision repair protein ERCC-6-like	ERCC6L	0.189069	0.0886968	141.1	142.31	28.9088	29.0306	28.4733	28.5986	28.7759	28.7949	-1			33	33	33	4692600000	71	223
Q2NL82	Q2NL82	Pre-rRNA-processing protein TSR1 homolog	TSR1	0.521704	-0.513442	91.809	22.971	26.0793	26.0341	26.7867	26.7238	27.1504	25.7183	-1			11	11	11	1059400000	38	46
Q2TAY7	Q2TAY7	WD40 repeat-containing protein SMU1;WD40 repeat-containing protein SMU1, N-terminally processed	SMU1	1.17351	-1.60715	57.543	8.0592	24.5841	23.9305	26.5953	23.846	24.8771	23.4585	-1			6	6	6	340410000	32	9
Q2TAZ0	Q2TAZ0	Autophagy-related protein 2 homolog A	ATG2A	0.385782	0.401419	212.86	2.1822	21.3003	22.0672	21.3274	20.752	20.788	21.8008	-1			2	2	2	24609000	86	1
Q2VPK5	Q2VPK5	Cytoplasmic tRNA 2-thiolation protein 2	CTU2	0.412993	-0.57283	56.107	2.0993	23.7903	23.3112	23.156	21.7232	22.5268	22.7203	-1			2	2	2	60108000	27	4
Q07157	Q07157	Tight junction protein ZO-1	TJP1	3.03339	-1.15734	195.46	138.01	29.6701	28.3106	29.4678	28.6603	29.6117	28.3067	-1	+	BicD2_Trbo_RFP-Trbo	29	29	29	5604100000	89	206
Q3KQU3	Q3KQU3	MAP7 domain-containing protein 1	MAP7D1	0.68244	-0.536817	92.819	5.8986	24.4233	23.7978	24.0749	24.4424	24.856	23.5035	-1			3	3	3	202580000	45	12
Q9Y4E6	Q9Y4E6	WD repeat-containing protein 7	WDR7	1.79622	-1.15767	163.81	1.9702	22.6328	22.1278	22.9518	21.8372	23.4953	21.6419	-1	+	BicD2_Trbo_RFP-Trbo	4	4	4	32453000	73	3
O96013;Q9P286;Q9NQU5	O96013	Serine/threonine-protein kinase PAK 4	PAK4	1.56726	-1.16269	64.071	12.012	26.58	24.9061	26.8799	25.8558	26.7221	25.9321	-1	+	BicD2_Trbo_RFP-Trbo	8	8	8	764240000	27	20
Q3ZCM7	Q3ZCM7	Tubulin beta-8 chain	TUBB8	0.450119	-0.470147	49.775	31.725	28.703	28.1246	29.6858	28.8249	29.2928	29.3216	-1			9	1	1	7451000000	21	30
Q3ZCQ8	Q3ZCQ8	Mitochondrial import inner membrane translocase subunit TIM50	TIMM50	0.0755906	-0.0270767	39.646	110.65	28.3745	28.1927	28.4917	28.6126	28.4225	28.4021	-1			10	10	10	4558700000	15	139
Q49A88	Q49A88	Coiled-coil domain-containing protein 14	CCDC14	0.914017	0.841315	106.3	12.067	21.8508	21.7541	21.3458	23.1445	21.7147	22.5368	-1			7	7	7	260690000	57	15
Q4KMP7	Q4KMP7	TBC1 domain family member 10B	TBC1D10B	1.21977	-2.28682	87.198	3.574	24.8659	20.6448	24.9023	23.2365	23.9443	22.9707	-1			5	5	5	139450000	30	4
Q4V328	Q4V328	GRIP1-associated protein 1	GRIPAP1	0.151447	-0.537173	96.004	3.4486	25.2689	24.4355	25.3404	24.8119	22.2997	22.0501	-1			4	4	4	234460000	57	4
Q9BRT8;Q8IUF1;Q5RIA9;Q5JTY5;Q4V339	Q9BRT8;Q8IUF1;Q5RIA9;Q5JTY5;Q4V339	COBW domain-containing protein 1;COBW domain-containing protein 2;COBW domain-containing protein 5;COBW domain-containing protein 3;COBW domain-containing protein 6	CBWD1;CBWD2;CBWD5;CBWD3;CBWD6	0.362536	0.446251	44.068	4.0149	22.1031	22.403	22.9073	23.4305	21.7142	22.2298	-1			2	2	2	32499000	20	1
Q8IWS0	Q8IWS0	PHD finger protein 6	PHF6	1.33997	-1.16327	41.29	4.1853	24.6257	22.7481	24.1397	23.1538	24.6354	24.0091	-1	+	BicD2_Trbo_RFP-Trbo	2	2	2	187520000	23	8
Q504Q3	Q504Q3	PAB-dependent poly(A)-specific ribonuclease subunit PAN2	PAN2	0.970101	-1.3237	135.37	5.4414	24.9667	23.6644	23.4942	22.0463	23.959	22.7382	-1			4	4	4	175170000	56	7
Q14247	Q14247	Src substrate cortactin	CTTN	4.27001	-1.16329	61.585	220.03	30.878	29.6875	30.8415	29.5807	30.6964	29.6578	-1	+	BicD2_Trbo_RFP-Trbo	24	24	24	12745000000	30	301
Q52LW3	Q52LW3	Rho GTPase-activating protein 29	ARHGAP29	0.137735	0.413247	142.06	2.512	22.8506	22.0677	23.3548	21.9441	20.2915	23.7248	-1			2	2	2	29858000	77	2
Q53EL6	Q53EL6	Programmed cell death protein 4	PDCD4	0.146038	0.178078	51.735	10.892	25.5025	25.3327	26.4344	26.2619	25.469	26.3454	-1			6	6	6	764980000	26	33
Q53EZ4	Q53EZ4	Centrosomal protein of 55 kDa	CEP55	1.22186	-0.788687	54.178	83.939	27.2419	26.7979	28.2243	27.149	27.8381	26.9914	-1			12	12	12	2458200000	32	96
Q53GG5	Q53GG5	PDZ and LIM domain protein 3	PDLIM3	1.12126	-0.958176	39.232	4.3341	24.093	23.4874	24.1835	22.2934	23.6856	23.3067	-1			2	2	2	120230000	20	7
Q53GQ0	Q53GQ0	Very-long-chain 3-oxoacyl-CoA reductase	HSD17B12	0.0333054	0.0496833	34.324	17.393	26.5978	27.2341	27.921	27.7971	27.0491	26.6858	-1			7	7	7	1867700000	16	54
Q53H12	Q53H12	Acylglycerol kinase, mitochondrial	AGK	0.751402	-0.894998	47.137	30.27	26.9573	25.6324	27.7888	26.9334	27.6867	27.182	-1			10	10	10	1619400000	22	55
Q0PNE2	Q0PNE2	Elongator complex protein 6	ELP6	2.10853	-1.16469	29.793	20.09	27.1942	25.9661	26.811	26.2179	27.2239	25.5511	-1	+	BicD2_Trbo_RFP-Trbo	7	7	7	912730000	17	47
Q562R1	Q562R1	Beta-actin-like protein 2	ACTBL2	0.0355434	-0.499619	42.003	1.7704	31.8651	31.3665	21.8298	31.5563	32.2289	21.5021	-1			4	1	1	36559000000	24	16
Q58A45	Q58A45	PAB-dependent poly(A)-specific ribonuclease subunit PAN3	PAN3	1.28869	-1.21249	95.612	13.158	23.4906	23.4875	24.5853	22.5604	24.2124	22.6028	-1			3	3	3	117950000	37	4
Q58FF6	Q58FF6	Putative heat shock protein HSP 90-beta 4	HSP90AB4P	0.285034	-0.416419	58.264	8.4655	28.151	27.4992	26.526	26.3008	27.1247	26.7524	-1			7	2	2	1893900000	28	18
Q58FF8	Q58FF8	Putative heat shock protein HSP 90-beta 2	HSP90AB2P	0.419583	-0.255145	44.348	81.163	28.9614	28.4277	29.3802	29.0338	28.7461	28.8608	-1			9	2	1	6308500000	25	54
Q5BJE1;REV__Q5T1N1	Q5BJE1;REV__Q5T1N1	Coiled-coil domain-containing protein 178	CCDC178	0.206462	0.755475	102.01	1.7607	23.324	21.0767	22.8937	25.0663	23.1665	25.5075	-1			2	2	2	233410000	63	3
Q5BKX5	Q5BKX5	UPF0692 protein C19orf54	C19orf54	0.309682	-0.504946	37.778	10.099	24.9461	25.188	25.1955	23.8729	26.1653	25.7312	-1			5	5	5	345360000	12	12
Q5BKY9;Q8N9E0	Q5BKY9;Q8N9E0	Protein FAM133B;Protein FAM133A	FAM133B;FAM133A	0.992265	-1.70982	28.385	5.5777	24.4482	23.1072	23.419	22.6419	26.1373	23.126	-1			2	2	2	161060000	9	6
Q5BKZ1	Q5BKZ1	DBIRD complex subunit ZNF326	ZNF326	1.23421	-1.25461	65.653	3.3443	23.1335	22.3722	24.4967	22.3406	23.0245	22.1779	-1			2	2	2	77628000	32	1
Q2M2I8;Q9NSY1	Q2M2I8	AP2-associated protein kinase 1	AAK1	3.70753	-1.16819	103.88	43.628	27.7266	26.6374	27.7516	26.6587	27.7065	26.384	-1	+	BicD2_Trbo_RFP-Trbo	11	11	11	1551300000	43	62
O14647	O14647	Chromodomain-helicase-DNA-binding protein 2	CHD2	3.40264	-1.16859	211.34	1.961	27.1127	25.9781	27.4203	26.1433	27.2602	26.166	-1	+	BicD2_Trbo_RFP-Trbo	1	1	1	700970000	103	3
Q5H9R7	Q5H9R7	Serine/threonine-protein phosphatase 6 regulatory subunit 3	PPP6R3	0.550595	-0.261861	97.668	44.156	27.2097	27.0841	27.6354	27.5056	27.4676	26.9375	-1			19	19	19	1780700000	46	110
Q5HYK7	Q5HYK7	SH3 domain-containing protein 19	SH3D19	1.15162	-1.09722	86.524	2.2407	22.6985	22.374	23.1805	22.5073	23.8997	21.6056	-1			2	2	2	71057000	47	2
Q5JRA6	Q5JRA6	Melanoma inhibitory activity protein 3	MIA3	0.97344	1.33457	213.7	2.1513	23.7922	23.6182	23.1446	24.6514	21.9234	24.5943	-1			2	2	2	173190000	117	4
Q5JRX3	Q5JRX3	Presequence protease, mitochondrial	PITRM1	0.592084	-1.14508	117.41	5.3117	23.6212	22.2659	25.1572	23.119	24.794	24.7523	-1			6	6	6	246950000	62	10
Q5JSH3	Q5JSH3	WD repeat-containing protein 44	WDR44	0.665917	-1.35934	101.37	7.8944	26.208	22.4566	25.44	24.8445	24.6637	24.9326	-1			8	8	8	313670000	61	8
Q9H788	Q9H788	SH2 domain-containing protein 4A	SH2D4A	2.57018	-1.16956	52.726	6.7456	23.5136	22.666	23.7677	22.2279	23.3978	22.2765	-1	+	BicD2_Trbo_RFP-Trbo	2	2	2	70507000	25	3
O75607	O75607	Nucleoplasmin-3	NPM3	1.35254	-1.16999	19.343	20.452	25.8966	24.9143	26.8009	25.3766	26.8874	25.784	-1	+	BicD2_Trbo_RFP-Trbo	6	6	6	751490000	8	30
Q5JTJ3	Q5JTJ3	Cytochrome c oxidase assembly factor 6 homolog	COA6	0.571441	-0.629585	14.116	14.884	24.3001	23.1526	25.1199	24.5009	24.2804	24.158	-1			1	1	1	274630000	8	23
P46736	P46736	Lys-63-specific deubiquitinase BRCC36	BRCC3	2.8229	-1.17373	36.072	27.857	28.6193	27.2835	28.3549	27.1459	28.5589	27.5826	-1	+	BicD2_Trbo_RFP-Trbo	9	9	9	2584500000	18	78
O15371	O15371	Eukaryotic translation initiation factor 3 subunit D	EIF3D	2.29625	-1.17378	63.972	179.21	29.5638	28.3057	30.0334	28.8341	29.7864	28.7224	-1	+	BicD2_Trbo_RFP-Trbo	19	19	19	7121000000	27	200
Q5PRF9	Q5PRF9	Protein Smaug homolog 2	SAMD4B	1.16201	-0.579725	75.483	14.245	25.6636	24.635	25.2531	24.5549	25.0007	24.9882	-1			4	4	4	388330000	27	27
Q5R372	Q5R372	Rab GTPase-activating protein 1-like	RABGAP1L	0.00437463	-0.00525538	92.512	11.155	25.8783	25.258	25.8793	26.2477	26.2416	26.4778	-1			11	9	9	675320000	42	32
Q5RKV6	Q5RKV6	Exosome complex component MTR3	EXOSC6	0.390321	-0.306684	28.235	31.642	26.143	25.6088	25.9088	25.6548	25.2198	25.0879	-1			5	5	5	720460000	15	37
Q5SQN1	Q5SQN1	Synaptosomal-associated protein 47	SNAP47	0.755938	-0.763592	52.562	16.649	25.8576	24.2417	25.4254	24.2534	24.7731	25.2703	-1			5	5	5	342450000	32	10
Q5SRE5	Q5SRE5	Nucleoporin NUP188 homolog	NUP188	0.546543	1.09864	196.04	6.4125	23.3841	24.4961	22.4102	25.0446	22.741	22.2905	-1			5	5	5	143390000	84	8
Q5SSJ5	Q5SSJ5	Heterochromatin protein 1-binding protein 3	HP1BP3	0.964333	-1.48206	61.206	1.5937	22.6823	20.311	23.1613	22.1986	21.7323	20.6201	-1			1	1	1	44248000	32	0
Q5SW79;Q96L14	Q5SW79	Centrosomal protein of 170 kDa	CEP170	0.776427	-0.197904	175.29	287.94	30.1628	29.9671	29.9289	29.6491	29.9951	29.877	-1			44	44	43	11312000000	102	395
Q5SWA1	Q5SWA1	Protein phosphatase 1 regulatory subunit 15B	PPP1R15B	0.940345	-1.12253	79.151	1.5602	23.1353	20.9445	22.2622	22.0921	23.3964	22.3897	-1			1	1	1	36438000	30	2
Q5SY16	Q5SY16	Polynucleotide 5-hydroxyl-kinase NOL9	NOL9	0.161058	-0.319246	79.322	3.6025	24.5166	23.5923	23.4846	23.0513	22.1597	22.5595	-1			4	4	4	157090000	24	8
Q96F07	Q96F07	Cytoplasmic FMR1-interacting protein 2	CYFIP2	1.43915	-1.17629	148.4	18.633	27.4859	25.4619	27.3319	26.6074	27.3583	26.5779	-1	+	BicD2_Trbo_RFP-Trbo	12	12	5	1351600000	77	65
P62136	P62136	Serine/threonine-protein phosphatase PP1-alpha catalytic subunit	PPP1CA	1.35724	-1.17732	37.512	23.049	28.3138	26.5098	28.615	27.8501	28.3809	27.4179	-1	+	BicD2_Trbo_RFP-Trbo	15	6	2	2945600000	19	93
Q5T1M5	Q5T1M5	FK506-binding protein 15	FKBP15	0.503981	0.59023	133.63	4.344	22.1257	23.7667	23.1953	23.6556	23.8706	23.54	-1			3	3	3	110310000	59	8
Q8N9N2	Q8N9N2	Activating signal cointegrator 1 complex subunit 1	ASCC1	2.57767	-1.17761	45.509	46.627	29.3091	27.9419	28.7815	27.7817	29.2	28.0341	-1	+	BicD2_Trbo_RFP-Trbo	10	10	10	4418600000	19	106
Q5T3I0	Q5T3I0	G patch domain-containing protein 4	GPATCH4	0.517704	-0.883415	50.381	26.732	27.1954	27.3476	26.336	25.3656	26.9588	25.1269	-1			6	6	6	693150000	30	27
Q5T4S7	Q5T4S7	E3 ubiquitin-protein ligase UBR4	UBR4	0.316381	0.484166	573.83	14.708	23.7023	24.6481	25.2265	25.5057	25.4192	25.6467	-1			13	13	13	601350000	254	20
Q6UXN9	Q6UXN9	WD repeat-containing protein 82	WDR82	2.39404	-1.17795	35.079	2.9242	25.4783	24.1961	25.8648	24.5347	25.6822	24.7606	-1	+	BicD2_Trbo_RFP-Trbo	2	2	2	385940000	18	13
Q5T6F2	Q5T6F2	Ubiquitin-associated protein 2	UBAP2	1.28892	-0.467549	117.11	47.413	27.4147	26.9886	27.8266	27.3219	27.7815	27.3097	-1			9	9	9	1841600000	30	64
Q5M775	Q5M775	Cytospin-B	SPECC1	1.41184	-1.17872	118.58	4.6593	24.8602	23.3397	25.0299	23.2411	23.8356	23.6086	-1	+	BicD2_Trbo_RFP-Trbo	6	6	6	213570000	64	2
Q5T8P6	Q5T8P6	RNA-binding protein 26	RBM26	0.932062	0.545832	113.6	4.3628	25.0426	25.7863	25.8456	25.9147	25.0217	25.8464	-1			4	4	3	674670000	42	7
Q5T9A4	Q5T9A4	ATPase family AAA domain-containing protein 3B	ATAD3B	0.258931	-0.0713361	72.572	36.177	27.5396	27.7279	27.8697	27.592	27.8134	27.6887	-1			22	8	6	2632600000	43	73
Q5T9S5;REV__O60282	Q5T9S5	Coiled-coil domain-containing protein 18	CCDC18	0.413356	0.699136	168.96	16.995	22.6885	24.4329	24.9949	23.9844	23.4399	24.8034	-1			13	13	13	409800000	96	18
Q5TB80	Q5TB80	Centrosomal protein of 162 kDa	CEP162	0.199876	-0.315205	161.94	2.4591	23.2052	21.4959	23.1133	23.1091	22.2031	22.971	-1			2	2	2	98332000	89	4
Q5TC12	Q5TC12	ATP synthase mitochondrial F1 complex assembly factor 1	ATPAF1	0.713385	-1.217	36.436	4.1504	22.9787	22.119	24.7615	23.2681	22.9094	21.6114	-1			4	4	4	176000000	18	4
Q9Y3U8	Q9Y3U8	60S ribosomal protein L36	RPL36	2.68058	-1.1818	12.254	10.168	28.139	27.0194	28.6186	27.2614	28.3913	27.3227	-1	+	BicD2_Trbo_RFP-Trbo	4	4	4	2725700000	6	54
Q5TEC6	Q5TEC6	Histone H3	HIST2H3PS2	0.075474	-0.172831	15.43	10.869	28.0632	29.6523	28.4451	27.1222	29.2122	28.4274	-1			3	3	1	5018100000	8	37
Q5TFE4	Q5TFE4	5-nucleotidase domain-containing protein 1	NT5DC1	0.530179	1.36913	51.844	6.1752	20.8095	21.2785	22.7948	24.6396	21.4197	23.2133	-1			3	3	3	105690000	26	6
Q5TZA2	Q5TZA2	Rootletin	CROCC	0.704531	1.85447	228.52	2.0714	21.343	25.256	23.1366	25.6024	25.3514	24.536	-1			4	4	4	399580000	145	5
Q5VIR6	Q5VIR6	Vacuolar protein sorting-associated protein 53 homolog	VPS53	1.03411	0.818234	94.404	3.2694	23.8148	23.6043	22.8609	24.2159	23.03	24.3401	-1			3	3	3	181840000	47	9
Q5VSL9;Q9ULQ0	Q5VSL9	Striatin-interacting protein 1	STRIP1	0.692594	-1.28242	95.575	7.3418	25.7287	23.6302	24.892	22.4435	23.3773	24.077	-1			4	4	4	283070000	40	20
Q5VSY0	Q5VSY0	G kinase-anchoring protein 1	GKAP1	0.306525	-0.831073	42.078	2.3687	21.5221	20.0155	23.1609	22.8007	23.4336	22.8073	-1			2	2	2	20708000	24	1
Q9H910	Q9H910	Hematological and neurological expressed 1-like protein	HN1L	2.67265	-1.18328	20.063	97.306	30.1562	28.5899	29.8729	29.0235	30.1343	29.0001	-1	+	BicD2_Trbo_RFP-Trbo	10	10	10	7406800000	14	200
Q5VT25	Q5VT25	Serine/threonine-protein kinase MRCK alpha	CDC42BPA	1.27011	-1.20071	197.3	4.2534	25.8561	24.2783	25.7616	24.1589	25.9561	25.5344	-1			9	9	9	455600000	95	10
Q5VTL8	Q5VTL8	Pre-mRNA-splicing factor 38B	PRPF38B	0.350763	-0.826167	64.467	2.4233	24.0494	22.8737	21.4152	21.3963	23.9515	22.6677	-1			3	3	3	109300000	22	3
Q9UKK9	Q9UKK9	ADP-sugar pyrophosphatase	NUDT5	2.17642	-1.18404	24.327	85.896	29.8867	28.3836	30.1197	29.1088	29.9756	28.9374	-1	+	BicD2_Trbo_RFP-Trbo	7	7	7	7163000000	12	173
Q5VUY2	Q5VUY2	Arylacetamide deacetylase-like 4	AADACL4	0.769525	-1.76029	46.081	1.6298	24.254	21.247	24.5698	24.7131	24.449	22.0319	-1			1	1	1	116160000	21	5
Q5VW32	Q5VW32	BRO1 domain-containing protein BROX	BROX	0.103732	0.222994	46.476	1.5849	22.97	21.48	22.9108	23.4609	21.5252	23.1342	-1			2	2	2	44093000	25	3
Q5VWX1	Q5VWX1	KH domain-containing, RNA-binding, signal transduction-associated protein 2	KHDRBS2	0.0814435	0.418312	38.927	1.6213	26.5237	25.4795	20.9845	24.701	26.2221	24.8048	-1			2	1	1	971220000	21	9
Q5VWZ2	Q5VWZ2	Lysophospholipase-like protein 1	LYPLAL1	0.105876	-0.211995	26.316	2.2945	22.0613	23.0659	23.9973	23.6196	23.3659	22.1029	-1			4	4	4	147410000	16	4
Q5VYK3	Q5VYK3	Proteasome-associated protein ECM29 homolog	ECM29	0.372268	-1.03556	204.29	4.0272	24.4282	21.3769	23.0721	21.8039	23.6476	24.8604	-1			6	6	6	171630000	106	3
Q5VZ89	Q5VZ89	DENN domain-containing protein 4C	DENND4C	0.181082	-0.187791	212.71	4.0606	23.6662	24.4965	24.0499	23.6783	24.5414	23.5194	-1			5	5	5	173700000	99	3
Q5XKP0	Q5XKP0	Protein QIL1	QIL1	0.1498	0.175193	13.087	6.545	24.6891	25.1422	26.039	25.7063	25.0416	25.4467	-1			2	2	2	549970000	6	28
Q63ZY3	Q63ZY3	KN motif and ankyrin repeat domain-containing protein 2	KANK2	0.182754	-0.325743	91.173	9.5307	22.6294	23.8712	23.5237	23.0576	23.5291	21.7763	-1			7	6	6	184520000	48	7
Q641Q2;Q9Y4E1	Q641Q2;Q9Y4E1	WASH complex subunit FAM21A;WASH complex subunit FAM21C	FAM21A;FAM21C	1.30014	-0.413748	147.18	61.534	27.4443	26.7846	27.5911	27.1556	27.3253	27.1792	-1			19	19	19	1696200000	67	90
P80723	P80723	Brain acid soluble protein 1	BASP1	2.03787	-1.18461	22.693	37.65	27.2657	25.7837	27.3789	26.3984	26.8891	25.7978	-1	+	BicD2_Trbo_RFP-Trbo	7	7	7	1575100000	13	47
P61923	P61923	Coatomer subunit zeta-1	COPZ1	1.61352	-1.18606	20.198	24.717	27.1565	25.5902	27.6965	26.3595	26.8881	26.2332	-1	+	BicD2_Trbo_RFP-Trbo	6	6	6	1205700000	5	61
Q66GS9	Q66GS9	Centrosomal protein of 135 kDa	CEP135	1.07349	2.33632	133.49	5.4996	22.0169	24.1947	19.628	22.834	22.617	24.2421	-1			6	6	6	204040000	87	5
Q66K74	Q66K74	Microtubule-associated protein 1S;MAP1S heavy chain;MAP1S light chain	MAP1S	0.610679	-0.629826	112.21	20.952	25.7964	24.2372	25.7374	25.1999	24.6696	24.8768	-1			4	4	4	387800000	41	19
O15498	O15498	Synaptobrevin homolog YKT6	YKT6	1.84686	-1.18932	22.417	5.9756	25.1112	24.0757	25.9125	24.4356	25.6755	24.6199	-1	+	BicD2_Trbo_RFP-Trbo	3	3	3	341290000	14	8
Q68CL5	Q68CL5	Tubulin polyglutamylase complex subunit 2	TPGS2	0.910875	1.13682	33.317	3.5266	22.0201	23.9637	22.0066	22.0273	21.5217	22.968	-1			2	2	2	95554000	16	4
Q68CZ1	Q68CZ1	Protein fantom	RPGRIP1L	0.538766	-0.662651	151.2	13.217	25.2373	24.5031	24.5941	24.5579	24.3337	23.1161	-1			6	6	6	243600000	78	9
Q96CX2;Q68DU8	Q96CX2	BTB/POZ domain-containing protein KCTD12	KCTD12	1.49426	-1.19125	35.7	12.562	25.6398	24.3666	25.372	23.6786	25.5334	24.9261	-1	+	BicD2_Trbo_RFP-Trbo	5	5	5	550290000	18	35
Q9UGI8	Q9UGI8	Testin	TES	2.8812	-1.1924	47.996	43.874	28.4026	27.1051	28.5113	27.2452	28.5871	27.5735	-1	+	BicD2_Trbo_RFP-Trbo	14	14	14	2529000000	27	104
O75534	O75534	Cold shock domain-containing protein E1	CSDE1	3.14893	-1.19266	88.884	287.2	30.4434	28.9752	30.4025	29.3899	30.3068	29.2097	-1	+	BicD2_Trbo_RFP-Trbo	29	29	29	9929800000	55	327
O00159	O00159	Unconventional myosin-Ic	MYO1C	4.4155	-1.19427	121.68	206.75	29.7105	28.4834	29.7117	28.4861	29.5444	28.4143	-1	+	BicD2_Trbo_RFP-Trbo	35	35	34	9060800000	67	315
Q6BDS2	Q6BDS2	UHRF1-binding protein 1	UHRF1BP1	1.1404	-2.56502	159.48	4.806	24.8523	24.1208	24.6407	21.7372	24.591	20.5309	-1			3	3	3	142790000	75	4
Q6EEV6;P61956;P55854	Q6EEV6;P61956;P55854	Small ubiquitin-related modifier 4;Small ubiquitin-related modifier 2;Small ubiquitin-related modifier 3	SUMO4;SUMO2;SUMO3	0.231726	0.86136	10.685	14.041	26.8303	26.3761	27.8089	26.9029	23.0682	27.0124	-1			2	2	2	1581100000	5	23
Q6FI81	Q6FI81	Anamorsin	CIAPIN1	1.27871	-0.670942	33.582	39.992	28.0992	27.0474	28.1223	27.7886	27.8226	27.1953	-1			9	9	9	1928300000	21	81
Q6GMV3	Q6GMV3	Putative peptidyl-tRNA hydrolase PTRHD1	PTRHD1	0.103748	-0.149003	15.805	5.2714	23.4026	22.5781	24.1	24.0844	23.2788	23.6718	-1			4	4	4	211980000	8	10
Q6IAA8	Q6IAA8	Ragulator complex protein LAMTOR1	LAMTOR1	1.01606	-1.44268	17.745	12.763	26.4559	23.9862	26.9415	25.9702	26.7924	25.9053	-1			6	6	6	765650000	9	30
Q6IAN0	Q6IAN0	Dehydrogenase/reductase SDR family member 7B	DHRS7B	0.452692	0.530352	35.119	1.8041	22.9639	22.5161	23.216	23.7507	22.4915	23.9956	-1			2	2	2	110440000	19	2
Q14684	Q14684	Ribosomal RNA processing protein 1 homolog B	RRP1B	2.06664	-1.19945	84.427	20.176	26.5148	25.0008	26.5324	25.7234	26.8642	25.5888	-1	+	BicD2_Trbo_RFP-Trbo	10	10	10	910600000	36	43
Q6NUN7	Q6NUN7	Uncharacterized protein C11orf63	C11orf63	0.395173	-1.26371	88.568	2.0326	25.6349	23.0498	21.2489	21.5417	23.9586	22.4597	-1			2	2	2	412570000	40	7
Q6NUQ1	Q6NUQ1	RAD50-interacting protein 1	RINT1	0.373561	0.317893	90.631	5.6931	25.2539	25.1029	25.2518	25.686	24.3761	25.0466	-1			4	4	4	394380000	38	19
Q9BX66	Q9BX66	Sorbin and SH3 domain-containing protein 1	SORBS1	1.80623	-1.20056	142.51	23.41	27.3589	26.2105	26.5886	25.6613	27.1677	25.6418	-1	+	BicD2_Trbo_RFP-Trbo	11	11	11	921820000	70	46
Q6NZ67;Q6P582	Q6NZ67;Q6P582	Mitotic-spindle organizing protein 2B;Mitotic-spindle organizing protein 2A	MZT2B;MZT2A	0.162439	0.380989	16.225	1.9109	24.1739	22.2517	22.0361	24.0433	23.166	24.2241	-1			3	3	3	177530000	10	11
Q6P0Q8;O60307	Q6P0Q8;O60307	Microtubule-associated serine/threonine-protein kinase 2;Microtubule-associated serine/threonine-protein kinase 3	MAST2;MAST3	0.086562	0.13959	196.43	4.1717	22.01	21.5712	21.049	21.212	22.065	22.7596	-1			3	2	2	51911000	97	3
Q6P158	Q6P158	Putative ATP-dependent RNA helicase DHX57	DHX57	1.02585	-1.04077	155.6	5.066	25.1923	23.351	24.4709	24.6983	25.331	23.8227	-1			7	5	5	215270000	79	6
Q6P1J9	Q6P1J9	Parafibromin	CDC73	0.794268	-0.629204	60.576	2.7016	22.9108	22.9998	22.9043	21.7597	23.1101	22.2781	-1			3	3	3	56326000	35	3
Q6P1K2	Q6P1K2	Polyamine-modulated factor 1	PMF1	0.327267	0.820663	23.339	3.0004	22.9617	23.1608	23.6765	25.5213	22.0677	22.4857	-1			3	3	3	133360000	15	2
Q6P1L5	Q6P1L5	Protein FAM117B	FAM117B	0.0755476	0.234183	61.967	2.1873	25.1321	25.1551	23.7317	22.404	23.1227	25.1299	-1			3	3	3	322650000	31	2
Q6P1L8	Q6P1L8	39S ribosomal protein L14, mitochondrial	MRPL14	0.81443	-0.93395	15.947	2.0433	23.57	21.5358	23.6663	22.7065	22.9662	23.1584	-1			1	1	1	96045000	10	10
P53007	P53007	Tricarboxylate transport protein, mitochondrial	SLC25A1	2.10712	-1.20252	34.012	11.14	27.0623	25.3593	27.0706	25.9145	26.5388	25.7902	-1	+	BicD2_Trbo_RFP-Trbo	5	5	5	1082500000	17	26
Q6P2E9	Q6P2E9	Enhancer of mRNA-decapping protein 4	EDC4	0.284903	0.242159	151.66	85.425	27.4985	27.4083	28.0089	27.7848	27.0162	28.0569	-1			24	24	24	2306300000	59	97
P25685;Q9UDY4	P25685	DnaJ homolog subfamily B member 1	DNAJB1	1.3668	-1.20264	38.044	11.042	26.2614	24.3849	26.5555	25.6416	26.3475	25.53	-1	+	BicD2_Trbo_RFP-Trbo	8	8	8	781290000	22	41
Q9UG63	Q9UG63	ATP-binding cassette sub-family F member 2	ABCF2	2.18794	-1.20939	71.289	80.878	29.2456	27.7814	29.2956	27.7528	28.6127	27.9915	-1	+	BicD2_Trbo_RFP-Trbo	18	18	18	3863500000	35	145
Q6P3W7	Q6P3W7	SCY1-like protein 2	SCYL2	0.408141	0.403165	103.71	16.336	26.5395	26.5155	25.4123	26.1773	25.4079	25.8764	-1			9	9	9	697550000	46	31
Q6P587	Q6P587	Acylpyruvase FAHD1, mitochondrial	FAHD1	0.00286687	-0.00610797	24.843	9.5355	23.9127	22.8515	24.1483	25.2174	23.798	23.7717	-1			2	2	2	168820000	16	9
Q6P5Z2	Q6P5Z2	Serine/threonine-protein kinase N3	PKN3	0.813064	-1.66781	99.419	14.134	26.2817	24.642	25.4015	22.3456	25.6861	25.3782	-1			8	7	7	483900000	46	14
Q6P996;Q6P474	Q6P996	Pyridoxal-dependent decarboxylase domain-containing protein 1	PDXDC1	1.13679	-1.17921	86.706	28.167	27.1471	25.118	27.1901	26.6285	27.4237	26.4766	-1			13	13	13	1105400000	41	37
Q6PD74	Q6PD74	Alpha- and gamma-adaptin-binding protein p34	AAGAB	1.20841	-1.10298	34.593	17.918	26.5255	24.4706	26.2826	25.3481	26.2311	25.9115	-1			4	4	4	723180000	12	25
Q6PGP7	Q6PGP7	Tetratricopeptide repeat protein 37	TTC37	0.00305518	0.00637627	175.48	8.6462	23.6561	23.1333	23.9386	25.2126	24.7203	23.9882	-1			7	7	7	211650000	91	10
Q6PI48	Q6PI48	Aspartate--tRNA ligase, mitochondrial	DARS2	1.17961	-1.06501	73.562	7.6863	25.1995	24.075	25.5337	25.039	25.2265	23.6508	-1			5	5	5	418500000	42	19
Q6PJI9	Q6PJI9	WD repeat-containing protein 59	WDR59	0.610521	-0.535316	109.79	1.9544	22.792	22.3789	23.0118	22.9122	22.6908	21.5975	-1			1	1	1	52375000	49	1
Q9Y295	Q9Y295	Developmentally-regulated GTP-binding protein 1	DRG1	2.42126	-1.21088	40.542	49.916	27.7453	26.2366	27.8166	26.6216	27.2889	26.3601	-1	+	BicD2_Trbo_RFP-Trbo	12	12	12	1493300000	26	77
P49674;P48730	P49674;P48730	Casein kinase I isoform epsilon;Casein kinase I isoform delta	CSNK1E;CSNK1D	2.68891	-1.21287	47.315	10.323	26.5063	25.2769	26.3177	25.0269	26.0437	24.9253	-1	+	BicD2_Trbo_RFP-Trbo	6	6	6	777010000	22	36
Q6R327	Q6R327	Rapamycin-insensitive companion of mTOR	RICTOR	0.338627	-0.623388	192.22	14.417	25.7689	24.3311	23.4183	24.2986	25.6248	24.3122	-1			11	11	11	294030000	98	14
Q6UB35	Q6UB35	Monofunctional C1-tetrahydrofolate synthase, mitochondrial	MTHFD1L	0.550653	-1.27663	105.79	9.2454	23.2547	24.1623	25.1558	21.7148	25.2866	23.99	-1			8	8	8	313980000	52	14
Q96FJ0	Q96FJ0	AMSH-like protease	STAMBPL1	1.5383	-1.21574	49.783	22.136	27.8569	25.9737	27.5757	26.7459	28.0528	27.1186	-1	+	BicD2_Trbo_RFP-Trbo	12	12	12	1462500000	22	50
Q15019	Q15019	Septin-2	SEPT2	2.90098	-1.21676	41.487	102.69	28.9506	27.6046	29.0729	27.9401	28.7491	27.5777	-1	+	BicD2_Trbo_RFP-Trbo	13	13	12	3845000000	21	141
P52594	P52594	Arf-GAP domain and FG repeat-containing protein 1	AGFG1	2.25756	-1.22498	58.259	245.06	30.4774	29.3922	30.2409	29.2144	30.2515	28.6882	-1	+	BicD2_Trbo_RFP-Trbo	14	14	14	8966300000	19	214
Q96KB5	Q96KB5	Lymphokine-activated killer T-cell-originated protein kinase	PBK	1.44618	-1.2293	36.085	5.5884	25.7778	24.2678	26.077	24.1331	25.5041	25.2701	-1	+	BicD2_Trbo_RFP-Trbo	4	4	4	553770000	18	22
Q8N3R9	Q8N3R9	MAGUK p55 subfamily member 5	MPP5	1.71695	-1.23033	77.293	6.5468	25.7579	24.8782	25.9636	24.0762	25.2271	24.3033	-1	+	BicD2_Trbo_RFP-Trbo	6	6	6	361240000	43	8
Q86TX2;P49753;Q3I5F7	Q86TX2;P49753;Q3I5F7	Acyl-coenzyme A thioesterase 1;Acyl-coenzyme A thioesterase 2, mitochondrial;Putative acyl-coenzyme A thioesterase 6	ACOT1;ACOT2;ACOT6	1.49506	-1.23499	46.277	9.2418	25.2485	23.9806	25.2468	24.796	25.5089	23.5228	-1	+	BicD2_Trbo_RFP-Trbo	4	4	4	318340000	26	7
P00167	P00167	Cytochrome b5	CYB5A	2.15854	-1.23631	15.33	4.8344	24.4583	23.4869	24.9359	23.3865	24.2451	23.057	-1	+	BicD2_Trbo_RFP-Trbo	3	3	3	183190000	8	7
Q6XZF7	Q6XZF7	Dynamin-binding protein	DNMBP	0.219252	-0.597476	177.35	2.6063	21.5919	23.0341	22.1031	21.703	24.7475	21.9129	-1			3	3	3	74430000	88	2
Q6Y7W6	Q6Y7W6	PERQ amino acid-rich with GYF domain-containing protein 2	GIGYF2	1.24972	-0.472384	150.07	95.917	28.3477	28.1383	28.8226	27.8653	28.4569	28.2064	-1			19	19	19	3836800000	56	153
Q6YN16	Q6YN16	Hydroxysteroid dehydrogenase-like protein 2	HSDL2	0.978977	-1.35553	45.394	8.8088	24.4244	22.0867	24.6884	23.4765	24.7929	24.2759	-1			5	5	5	250160000	27	16
Q6ZRV2	Q6ZRV2	Protein FAM83H	FAM83H	0.00787971	0.0297343	127.12	2.7769	23.6227	26.0502	23.878	23.9256	24.1759	21.79	-1			4	4	4	837900000	64	4
O94905	O94905	Erlin-2	ERLIN2	1.61353	-1.24305	37.839	32.228	27.006	25.0078	26.9955	25.7094	26.5314	26.0865	-1	+	BicD2_Trbo_RFP-Trbo	7	7	5	840710000	24	43
Q6ZSZ5	Q6ZSZ5	Rho guanine nucleotide exchange factor 18	ARHGEF18	1.09736	-1.21035	151.64	1.695	24.1972	24.0956	24.3707	22.5337	24.2536	22.5612	-1			3	3	3	136580000	69	3
Q16630	Q16630	Cleavage and polyadenylation specificity factor subunit 6	CPSF6	1.7112	-1.24599	59.209	21.157	26.9936	25.6997	27.7134	26.2256	27.5156	26.5592	-1	+	BicD2_Trbo_RFP-Trbo	6	6	6	1294400000	21	49
Q9NRY4	Q9NRY4	Rho GTPase-activating protein 35	ARHGAP35	2.60797	-1.24844	170.51	61.209	28.649	27.7328	28.5367	27.173	28.8167	27.3512	-1	+	BicD2_Trbo_RFP-Trbo	24	24	23	2666100000	86	109
O15056	O15056	Synaptojanin-2	SYNJ2	3.84601	-1.24964	165.54	126.29	29.3767	28.0589	29.3479	27.9755	29.1123	28.0535	-1	+	BicD2_Trbo_RFP-Trbo	37	37	37	4561500000	76	195
Q6ZWJ1	Q6ZWJ1	Syntaxin-binding protein 4	STXBP4	0.0937383	-0.348487	61.661	14.267	24.9475	24.6242	24.7843	23.1467	21.4279	22.3432	-1			7	7	7	298170000	33	19
Q6ZXV5	Q6ZXV5	Transmembrane and TPR repeat-containing protein 3	TMTC3	0.0886592	0.123938	104.01	2.0251	23.1694	22.2913	21.4718	22.4348	22.1083	22.3952	-1			3	3	3	40891000	53	4
Q709C8	Q709C8	Vacuolar protein sorting-associated protein 13C	VPS13C	0.619738	1.13437	422.39	4.039	24.0696	24.696	25.034	25.4286	22.3432	24.7254	-1			5	5	5	302520000	215	5
Q70E73	Q70E73	Ras-associated and pleckstrin homology domains-containing protein 1	RAPH1	0.244869	-0.414443	135.25	2.7712	23.432	21.6871	23.1194	22.9145	21.5957	22.3021	-1			2	2	2	23805000	49	3
Q70UQ0	Q70UQ0	Inhibitor of nuclear factor kappa-B kinase-interacting protein	IKBIP	0.75857	1.40508	39.309	1.7295	23.1076	22.3603	22.0304	24.4336	21.0192	23.5785	-1			1	1	1	89947000	22	1
Q92841	Q92841	Probable ATP-dependent RNA helicase DDX17	DDX17	2.76918	-1.25019	80.272	175.87	30.6644	29.2542	30.9738	29.6427	30.6545	29.6453	-1	+	BicD2_Trbo_RFP-Trbo	29	29	21	14320000000	38	417
Q71U36;P0DPH8;P0DPH7;Q6PEY2	Q71U36;P0DPH8;P0DPH7;Q6PEY2	Tubulin alpha-1A chain;Tubulin alpha-3E chain	TUBA1A;TUBA3E	0.503358	-0.347682	50.135	323.31	34.2028	33.5042	34.6582	34.3807	34.2349	34.168	-1			26	26	1	243110000000	22	1020
Q71UM5	Q71UM5	40S ribosomal protein S27-like	RPS27L	0.446879	-0.373274	9.4771	6.8227	26.8014	25.5434	26.5866	26.6006	26.3901	26.5144	-1			5	1	1	1008700000	5	22
Q765P7	Q765P7	MTSS1-like protein	MTSS1L	0.032783	0.0571537	79.928	13.925	24.8698	24.3709	24.975	24.1036	23.273	24.8147	-1			4	4	4	208740000	31	10
Q7KZF4	Q7KZF4	Staphylococcal nuclease domain-containing protein 1	SND1	0.819851	-0.765816	102	245.16	29.3499	28.1945	30.0849	29.4634	29.5787	29.0581	-1			37	37	37	7923100000	58	320
O15160	O15160	DNA-directed RNA polymerases I and III subunit RPAC1	POLR1C	2.25446	-1.25233	39.249	61.892	27.5353	26.3833	27.679	25.8632	27.3556	26.5665	-1	+	BicD2_Trbo_RFP-Trbo	10	10	10	1105000000	16	41
Q7L0Y3	Q7L0Y3	Mitochondrial ribonuclease P protein 1	TRMT10C	0.504825	-0.511933	47.346	2.8358	23.9888	22.8717	23.6298	24.2266	24.2647	23.2492	-1			3	3	3	183970000	29	1
Q7L1Q6	Q7L1Q6	Basic leucine zipper and W2 domain-containing protein 1	BZW1	0.732683	-0.404164	48.043	3.3389	26.757	26.1609	27.123	26.9134	27.0997	26.6929	-1			5	5	4	1511800000	30	30
P55145	P55145	Mesencephalic astrocyte-derived neurotrophic factor	MANF	1.43357	-1.25247	20.7	5.3114	22.936	21.838	23.9654	22.3396	23.7603	22.7267	-1	+	BicD2_Trbo_RFP-Trbo	2	2	2	75265000	10	6
Q12965;O00160	Q12965	Unconventional myosin-Ie	MYO1E	2.11478	-1.25258	127.06	19.361	27.1095	25.2994	26.7949	25.7667	26.3784	25.4589	-1	+	BicD2_Trbo_RFP-Trbo	13	13	13	751380000	65	39
Q7L2H7	Q7L2H7	Eukaryotic translation initiation factor 3 subunit M	EIF3M	0.483725	-0.40266	42.502	59.087	27.5662	27.21	28.4366	28.0166	28.2703	27.8385	-1			10	10	10	2707400000	23	112
Q7L576	Q7L576	Cytoplasmic FMR1-interacting protein 1	CYFIP1	0.732234	-0.366438	145.18	4.2456	24.9754	24.1367	24.9975	24.8737	24.8698	24.733	-1			11	4	4	288730000	73	13
Q7L5N1	Q7L5N1	COP9 signalosome complex subunit 6	COPS6	0.75963	-0.399732	36.163	14.223	26.7365	25.7453	26.2479	26.1506	26.0196	25.9089	-1			7	7	7	850490000	14	30
Q07666;O75525	Q07666	KH domain-containing, RNA-binding, signal transduction-associated protein 1	KHDRBS1	2.30601	-1.25479	48.227	33.026	28.3226	27.0804	28.9183	27.3123	28.4497	27.5336	-1	+	BicD2_Trbo_RFP-Trbo	6	6	5	3133600000	22	90
Q9H8S9;Q7L9L4	Q9H8S9;Q7L9L4	MOB kinase activator 1A;MOB kinase activator 1B	MOB1A;MOB1B	0.487688	-0.799092	25.079	3.3894	22.8167	21.3681	21.5966	21.1772	23.2992	22.77	-1			3	3	3	70379000	10	3
Q7LBC6	Q7LBC6	Lysine-specific demethylase 3B	KDM3B	0.938013	-2.41752	191.58	4.1895	23.5267	20.3312	25.2415	24.0228	25.1728	22.3344	-1			3	3	3	115960000	89	2
Q7RTP6	Q7RTP6	Protein-methionine sulfoxide oxidase MICAL3	MICAL3	0.159543	-0.2052	224.29	3.3666	23.4896	23.712	22.8897	23.3041	24.4586	23.2062	-1			5	5	5	171080000	120	8
Q7RTV0	Q7RTV0	PHD finger-like domain-containing protein 5A	PHF5A	0.124935	-0.43473	12.405	2.4335	21.2651	22.3978	25.3672	23.5579	24.1409	23.5133	-1			3	3	3	203460000	8	7
Q99614	Q99614	Tetratricopeptide repeat protein 1	TTC1	1.42096	-1.26085	33.526	7.3173	25.1648	23.963	26.0689	24.8545	25.2999	23.9336	-1	+	BicD2_Trbo_RFP-Trbo	4	4	4	419540000	17	17
Q7Z2T5	Q7Z2T5	TRMT1-like protein	TRMT1L	0.798095	-0.893066	81.746	4.1174	23.5687	23.1468	23.7057	21.6781	23.5132	23.2835	-1			2	2	2	128920000	45	1
Q14680	Q14680	Maternal embryonic leucine zipper kinase	MELK	2.71973	-1.26126	74.641	2.8325	24.7216	23.699	24.7001	23.6775	25.1534	23.4149	-1	+	BicD2_Trbo_RFP-Trbo	4	3	3	183500000	38	4
Q7Z2Z2	Q7Z2Z2	Elongation factor Tu GTP-binding domain-containing protein 1	EFTUD1	0.853346	-1.35022	125.43	7.2391	22.4201	20.5019	23.3191	21.9071	23.477	22.7566	-1			1	1	1	29228000	55	2
Q7Z392	Q7Z392	Trafficking protein particle complex subunit 11	TRAPPC11	0.419317	0.79802	128.88	4.8994	23.5097	22.3233	21.5841	23.8852	22.9095	24.1888	-1			3	3	3	83973000	55	6
P38432	P38432	Coilin	COIL	1.85318	-1.26368	62.608	22.17	25.8946	25.2639	26.3766	24.6403	25.8487	24.4248	-1	+	BicD2_Trbo_RFP-Trbo	6	6	6	709080000	34	42
Q7Z3J3	Q7Z3J3	RanBP2-like and GRIP domain-containing protein 4	RGPD4	0.548499	1.60161	197.29	1.9479	23.5281	21.9805	22.1901	25.6964	22.814	25.6601	-1			40	1	1	196240000	111	2
Q7Z3T8	Q7Z3T8	Zinc finger FYVE domain-containing protein 16	ZFYVE16	0.258332	-0.0441551	168.9	317.7	30.0901	29.9272	30.0377	30.1263	30.1438	30.0856	-1			43	43	43	11838000000	68	424
Q7Z3U7	Q7Z3U7	Protein MON2 homolog	MON2	0.0396909	0.0350164	190.36	2.8803	23.208	23.1613	23.9026	23.4451	23.2137	23.823	-1			3	3	3	124460000	85	6
P0DPB6	P0DPB6			2.64356	-1.26481	15.237	4.4314	25.3322	24.1286	25.4684	24.2137	25.0833	23.7472	-1	+	BicD2_Trbo_RFP-Trbo	2	2	2	210250000	8	5
P08133	P08133	Annexin A6	ANXA6	1.50394	-1.26731	75.872	32.633	26.8707	25.5189	27.7922	26.3462	26.8702	25.866	-1	+	BicD2_Trbo_RFP-Trbo	14	14	14	1554100000	49	79
Q13310	Q13310	Polyadenylate-binding protein 4	PABPC4	4.06961	-1.26819	70.782	97.989	31.4697	30.093	31.4155	30.2927	31.3664	30.0614	-1	+	BicD2_Trbo_RFP-Trbo	23	15	13	17625000000	37	222
P52434	P52434	DNA-directed RNA polymerases I, II, and III subunit RPABC3	POLR2H	1.55258	-1.26832	17.143	40.625	26.9704	24.9128	26.5783	26.1306	26.9486	25.6489	-1	+	BicD2_Trbo_RFP-Trbo	5	5	5	769180000	10	17
Q7Z4H3	Q7Z4H3	HD domain-containing protein 2	HDDC2	0.353199	-0.656841	23.39	1.9716	22.9499	22.1113	24.7555	23.6869	23.9889	23.9256	-1			3	3	3	191600000	14	4
Q5T5Y3	Q5T5Y3	Calmodulin-regulated spectrin-associated protein 1	CAMSAP1	1.88141	-1.27072	177.97	32.975	27.8076	26.5858	27.3409	25.7366	27.4258	26.4398	-1	+	BicD2_Trbo_RFP-Trbo	22	22	22	1298600000	98	39
Q7Z4Q2	Q7Z4Q2	HEAT repeat-containing protein 3	HEATR3	0.0689716	-0.0815029	74.582	1.7526	22.5837	21.6331	21.6827	21.8336	22.1246	22.6797	-1			3	3	3	43171000	36	0
Q7Z4V5	Q7Z4V5	Hepatoma-derived growth factor-related protein 2	HDGFRP2	0.469813	-0.610202	74.316	7.9772	25.374	23.9392	25.6865	25.8596	25.5546	24.9857	-1			3	3	2	448590000	40	22
Q7Z4W1	Q7Z4W1	L-xylulose reductase	DCXR	0.0263089	0.036602	25.913	10.038	24.9093	24.6414	25.8777	25.3771	24.6014	25.4797	-1			5	5	5	464790000	16	24
Q9UET6	Q9UET6	Putative tRNA (cytidine(32)/guanosine(34)-2-O)-methyltransferase	FTSJ1	1.3973	-1.2714	36.079	8.9012	25.5244	25.1429	25.4721	23.9094	26.1389	24.269	-1	+	BicD2_Trbo_RFP-Trbo	5	5	5	554260000	10	23
Q7Z6J8	Q7Z6J8	E3 ubiquitin-protein ligase E3D	UBE3D	1.15533	1.1042	43.656	3.234	23.1561	23.1969	21.9207	23.3649	21.8176	23.6452	-1			3	3	3	56990000	24	1
Q7Z6Z7	Q7Z6Z7	E3 ubiquitin-protein ligase HUWE1	HUWE1	0.543915	0.327798	481.89	25.454	25.7088	25.5143	25.5276	26.0919	25.7724	26.386	-1			14	14	14	729540000	205	36
Q6ZSR9	Q6ZSR9	Uncharacterized protein FLJ45252		1.55224	-1.27164	37.976	67.23	27.0777	26.0125	26.6371	25.9277	26.9515	24.9111	-1	+	BicD2_Trbo_RFP-Trbo	7	7	7	880810000	15	31
Q7Z7A3	Q7Z7A3	Cytoplasmic tRNA 2-thiolation protein 1	CTU1	0.641979	-0.996522	36.45	6.842	25.0909	22.9446	24.3068	24.1029	25.6159	24.9765	-1			4	4	4	184310000	20	5
Q7Z7L1	Q7Z7L1	Schlafen family member 11	SLFN11	0.362769	-0.399048	102.83	3.3894	24.4247	24.7861	25.8257	25.0266	25.0528	24.2933	-1			6	6	6	364670000	49	4
Q86SX6	Q86SX6	Glutaredoxin-related protein 5, mitochondrial	GLRX5	0.0316744	-0.0827548	16.628	3.5183	23.8238	23.5684	22.054	22.0124	24.023	24.0718	-1			2	2	2	163730000	8	5
Q86TB9	Q86TB9	Protein PAT1 homolog 1	PATL1	0.374113	-0.496617	86.849	5.2302	23.2938	22.4601	24.2183	24.1438	23.8938	23.3122	-1			4	4	4	123460000	39	11
Q9Y383	Q9Y383	Putative RNA-binding protein Luc7-like 2	LUC7L2	2.28184	-1.27299	46.513	52.369	27.6407	26.3953	28.2437	26.7157	27.9574	26.9119	-1	+	BicD2_Trbo_RFP-Trbo	13	13	8	2080500000	19	86
Q13242	Q13242	Serine/arginine-rich splicing factor 9	SRSF9	1.84956	-1.27461	25.542	9.3333	26.6041	25.8341	27.2799	25.1637	26.5528	25.6153	-1	+	BicD2_Trbo_RFP-Trbo	5	5	5	838800000	16	30
Q86U42;A6NDY0	Q86U42	Polyadenylate-binding protein 2	PABPN1	0.419533	-0.487231	32.749	28.723	25.145	24.6635	26.1394	25.4902	26.2042	25.8732	-1			5	5	5	577470000	15	23
O00560	O00560	Syntenin-1	SDCBP	2.12826	-1.27788	32.444	3.6772	23.9201	22.5054	23.9173	23.0348	24.5001	22.9638	-1	+	BicD2_Trbo_RFP-Trbo	2	2	2	126920000	16	9
P59998	P59998	Actin-related protein 2/3 complex subunit 4	ARPC4	1.55196	-1.27902	19.667	14.573	26.7351	25.3128	26.9597	26.1696	26.5709	24.9462	-1	+	BicD2_Trbo_RFP-Trbo	7	7	7	1081300000	13	48
Q05682	Q05682	Caldesmon	CALD1	1.51199	-1.28125	93.23	75.381	27.7602	26.1011	28.3174	27.3041	28.113	26.9417	-1	+	BicD2_Trbo_RFP-Trbo	10	10	10	2009300000	44	68
Q86UP2	Q86UP2	Kinectin	KTN1	0.131592	-0.273233	156.27	21.552	24.5971	24.0675	25.9608	26.0591	24.7077	24.3193	-1			15	15	15	526440000	94	22
O94973	O94973	AP-2 complex subunit alpha-2	AP2A2	1.78216	-1.28199	103.96	26.72	26.1583	25.321	26.8379	25.2693	27.1464	25.7063	-1	+	BicD2_Trbo_RFP-Trbo	15	10	10	707130000	56	32
Q9UKD2	Q9UKD2	mRNA turnover protein 4 homolog	MRTO4	1.71807	-1.28528	27.56	2.4964	24.8297	23.1165	24.9226	24.2523	25.1099	23.6375	-1	+	BicD2_Trbo_RFP-Trbo	4	4	4	242570000	16	4
P30046;A6NHG4	P30046;A6NHG4	D-dopachrome decarboxylase;D-dopachrome decarboxylase-like protein	DDT;DDTL	1.70961	-1.28569	12.712	8.7547	26.1819	24.9743	27.1177	25.5024	26.6919	25.6579	-1	+	BicD2_Trbo_RFP-Trbo	3	3	3	911430000	7	21
Q86V81	Q86V81	THO complex subunit 4	ALYREF	0.114924	-0.183322	26.888	50.817	26.8201	26.6186	28.3266	27.9074	27.3926	27.4633	-1			5	5	5	2260600000	15	51
O00505	O00505	Importin subunit alpha-4	KPNA3	2.19704	-1.28573	57.81	96.604	28.5082	27.0758	28.9869	27.4068	28.6034	27.7587	-1	+	BicD2_Trbo_RFP-Trbo	12	12	10	2970800000	19	103
Q86VF7	Q86VF7	Nebulin-related-anchoring protein	NRAP	0.0941202	0.288986	197.07	1.601	22.7802	25.2607	24.5396	23.1539	25.6081	25.3802	-1			2	2	2	614030000	129	2
Q86VP6;O75155	Q86VP6	Cullin-associated NEDD8-dissociated protein 1	CAND1	1.02741	-0.579485	136.37	177.05	29.3932	28.486	29.7754	29.1233	29.4198	29.2405	-1			34	34	34	8506800000	66	318
Q86VS8	Q86VS8	Protein Hook homolog 3	HOOK3	0.613281	-1.06987	83.125	2.1993	22.6655	22.5164	23.8031	23.1195	23.1298	20.7529	-1			2	2	2	78804000	44	2
Q8TDP1	Q8TDP1	Ribonuclease H2 subunit C	RNASEH2C	1.95487	-1.28729	17.84	2.5746	23.1043	22.3059	22.9677	21.4083	23.0034	21.4993	-1	+	BicD2_Trbo_RFP-Trbo	1	1	1	49274000	10	2
Q86W92;Q8ND30	Q86W92	Liprin-beta-1	PPFIBP1	0.129086	0.122957	114.02	13.12	25.0807	25.8661	26.2033	25.4998	25.4083	25.6954	-1			10	10	10	623380000	57	21
Q86X10	Q86X10	Ral GTPase-activating protein subunit beta	RALGAPB	0.708025	-0.462641	166.8	13.366	25.7329	25.2523	25.2011	24.6723	25.8092	25.4307	-1			6	6	6	395750000	75	20
Q9BUJ2	Q9BUJ2	Heterogeneous nuclear ribonucleoprotein U-like protein 1	HNRNPUL1	2.16059	-1.29069	95.737	50.747	28.5275	26.7461	28.5925	27.509	28.4939	27.4867	-1	+	BicD2_Trbo_RFP-Trbo	17	16	16	2976900000	46	93
Q86X55	Q86X55	Histone-arginine methyltransferase CARM1	CARM1	0.307995	-0.266448	65.853	11.103	26.2655	26.1471	26.3916	26.6551	26.3915	25.447	-1			7	7	7	1098900000	26	24
Q9P0K1	Q9P0K1	Disintegrin and metalloproteinase domain-containing protein 22	ADAM22	3.30673	-1.29169	100.43	1.7508	24.9346	23.678	24.9412	23.6465	24.6988	23.375	-1	+	BicD2_Trbo_RFP-Trbo	1	1	1	183430000	47	2
Q9BUK6	Q9BUK6	Protein misato homolog 1	MSTO1	1.90079	-1.29308	61.835	3.9807	23.8419	22.3704	23.9655	23.1548	23.7895	22.1925	-1	+	BicD2_Trbo_RFP-Trbo	2	2	2	97256000	25	5
P11940	P11940	Polyadenylate-binding protein 1	PABPC1	3.92246	-1.29751	70.67	323.31	33.3192	32.0064	33.3443	32.2272	33.4774	32.0147	-1	+	BicD2_Trbo_RFP-Trbo	28	28	5	69896000000	38	555
P78318	P78318	Immunoglobulin-binding protein 1	IGBP1	2.99617	-1.29788	39.221	172.13	29.2986	27.8725	29.2442	28.2612	29.2522	27.7677	-1	+	BicD2_Trbo_RFP-Trbo	11	11	11	4150600000	23	149
Q86XR8	Q86XR8	Centrosomal protein of 57 kDa	CEP57	0.163521	-1.0523	57.088	1.6203	26.9777	26.2546	22.0763	20.8187	27.1257	25.9496	-1			1	1	1	756540000	37	5
Q86XZ4	Q86XZ4	Spermatogenesis-associated serine-rich protein 2	SPATS2	0.601281	-1.09763	59.544	4.4775	25.3321	24.6581	24.3932	22.1905	24.7139	24.2977	-1			3	3	3	192080000	32	6
Q86Y56	Q86Y56	Dynein assembly factor 5, axonemal	DNAAF5	0.126209	0.311609	93.52	24.666	25.209	24.0228	25.9542	25.8212	23.7534	26.0074	-1			10	10	10	624700000	47	25
Q86YL5	Q86YL5	Testis development-related protein	TDRP	1.02325	-0.844804	20.402	37.797	27.58	25.9118	26.9895	27.1057	27.3777	26.3951	-1			6	6	6	1274300000	10	52
Q86YT6	Q86YT6	E3 ubiquitin-protein ligase MIB1	MIB1	0.364401	-0.238354	110.13	33.342	25.9751	25.839	25.3767	25.5817	26.1808	25.3968	-1			12	12	12	1003500000	58	30
Q8IU81	Q8IU81	Interferon regulatory factor 2-binding protein 1	IRF2BP1	0.776458	-1.17321	61.687	1.8458	24.1187	21.021	23.0381	22.6439	22.8551	22.8274	-1			2	2	2	79125000	36	1
Q8IUD2;O15083	Q8IUD2	ELKS/Rab6-interacting/CAST family member 1	ERC1	0.846037	-1.5969	128.08	4.5118	25.1702	23.94	24.1423	21.3244	24.3064	23.5638	-1			3	3	3	196510000	76	6
Q8IUR0	Q8IUR0	Trafficking protein particle complex subunit 5	TRAPPC5	0.899787	-0.751793	20.783	3.3456	27.061	26.037	27.8137	27.0759	27.4132	26.9196	-1			3	3	3	2813000000	14	24
Q8IUW3	Q8IUW3	Spermatogenesis-associated protein 2-like protein	SPATA2L	0.0895762	-0.155398	46.178	2.2926	24.7777	25.3645	24.8657	23.7943	25.5688	25.5871	-1			3	3	3	363080000	20	6
Q9BPZ7	Q9BPZ7	Target of rapamycin complex 2 subunit MAPKAP1	MAPKAP1	1.84549	-1.29973	59.122	8.2231	24.5144	22.9834	24.9955	23.1439	24.1787	23.6622	-1	+	BicD2_Trbo_RFP-Trbo	2	2	2	177340000	28	7
Q8IV33	Q8IV33	Uncharacterized protein KIAA0825	KIAA0825	0.448929	-1.07755	147.73	2.6636	25.1267	23.6548	23.504	24.2522	23.7996	21.2906	-1			2	2	2	187280000	75	12
Q8IV63	Q8IV63	Inactive serine/threonine-protein kinase VRK3	VRK3	0.19145	-0.315871	52.881	2.5455	22.0034	23.2332	22.7917	21.8105	22.4496	21.2534	-1			2	2	2	78975000	28	6
Q8IVD9	Q8IVD9	NudC domain-containing protein 3	NUDCD3	0.0961748	-0.0895551	40.822	10.513	23.8309	23.5978	24.5965	24.4085	24.0197	24.1723	-1			1	1	1	207240000	26	12
P51116	P51116	Fragile X mental retardation syndrome-related protein 2	FXR2	2.90356	-1.30003	74.222	232.42	29.1537	27.9633	29.5587	28.2924	29.4242	27.9808	-1	+	BicD2_Trbo_RFP-Trbo	18	15	15	4164100000	43	151
Q8IVM0	Q8IVM0	Coiled-coil domain-containing protein 50	CCDC50	0.501323	-0.948819	35.822	14.468	24.5311	23.1655	24.9153	22.2027	23.1193	24.351	-1			1	1	1	95671000	19	1
Q96C19	Q96C19	EF-hand domain-containing protein D2	EFHD2	3.03561	-1.30086	26.697	36.368	27.5174	26.3911	27.6536	26.0423	27.2954	26.1303	-1	+	BicD2_Trbo_RFP-Trbo	10	10	8	1260700000	16	60
Q8IWC1	Q8IWC1	MAP7 domain-containing protein 3	MAP7D3	0.900437	-1.03383	98.428	8.0918	25.2252	25.3324	26.4317	25.1675	25.9936	24.0491	-1			5	5	5	476430000	56	20
Q9Y490;Q9Y4G6	Q9Y490	Talin-1	TLN1	4.21063	-1.30125	269.76	323.31	31.2963	29.8414	31.1411	29.9921	31.1333	29.8334	-1	+	BicD2_Trbo_RFP-Trbo	69	69	69	16164000000	150	614
Q8IWJ2	Q8IWJ2	GRIP and coiled-coil domain-containing protein 2	GCC2	0.306296	-0.380375	195.91	2.2418	24.8988	23.8177	23.3199	24.0786	24.7269	23.9081	-1			4	3	3	216550000	130	3
P05783;CON__H-INV:HIT000015463	P05783	Keratin, type I cytoskeletal 18	KRT18	1.5895	-1.31017	48.057	60.602	28.0896	26.515	28.5536	27.667	28.2146	26.7453	-1	+	BicD2_Trbo_RFP-Trbo	9	7	5	2557300000	28	117
Q9UJU6	Q9UJU6	Drebrin-like protein	DBNL	1.82035	-1.31042	48.207	125.33	28.0557	26.5996	27.85	27.326	28.2922	26.341	-1	+	BicD2_Trbo_RFP-Trbo	10	10	10	1928900000	24	102
Q9BRS2	Q9BRS2	Serine/threonine-protein kinase RIO1	RIOK1	3.01674	-1.31229	65.582	19.725	27.3293	26.3528	27.4604	25.8559	27.3791	26.0232	-1	+	BicD2_Trbo_RFP-Trbo	9	9	9	1076400000	29	28
Q8IWX8	Q8IWX8	Calcium homeostasis endoplasmic reticulum protein	CHERP	1.17696	-0.797959	103.7	12.568	26.0024	25.4741	26.4852	25.7473	27.0209	25.8932	-1			8	8	8	776490000	35	31
Q9NUQ3	Q9NUQ3	Gamma-taxilin	TXLNG	2.21949	-1.31303	60.585	47.644	27.7098	26.2983	28.1193	26.8092	28.1728	26.9554	-1	+	BicD2_Trbo_RFP-Trbo	10	10	10	2011200000	36	84
Q8IX12	Q8IX12	Cell division cycle and apoptosis regulator protein 1	CCAR1	0.980146	-1.07507	132.82	11.879	26.228	26.0156	27.1803	24.7599	26.6984	26.106	-1			8	8	7	999860000	56	20
Q8IX18	Q8IX18	Probable ATP-dependent RNA helicase DHX40	DHX40	0.151644	-0.434881	88.559	2.3329	23.4102	23.7894	21.5467	20.7028	23.2141	22.3742	-1			3	3	3	51865000	52	3
O00422	O00422	Histone deacetylase complex subunit SAP18	SAP18	1.76257	-1.31485	17.561	5.2932	25.6169	23.8684	25.9337	24.3001	25.4955	24.933	-1	+	BicD2_Trbo_RFP-Trbo	2	2	2	374940000	14	21
Q8IXL7	Q8IXL7	Methionine-R-sulfoxide reductase B3	MSRB3	0.587958	-0.937871	20.702	1.8793	22.8905	21.143	23.788	23.3416	23.4334	22.8136	-1			1	1	1	87552000	6	7
Q8IXM3	Q8IXM3	39S ribosomal protein L41, mitochondrial	MRPL41	1.06535	-1.53742	15.383	2.6018	22.5734	20.7895	22.8755	22.5585	24.0283	21.517	-1			2	2	2	37223000	6	4
Q8IXW5	Q8IXW5	Putative RNA polymerase II subunit B1 CTD phosphatase RPAP2	RPAP2	0.980279	-1.73017	69.508	5.5075	24.3232	23.2497	23.8919	20.7381	24.0919	23.1287	-1			5	5	5	117780000	38	7
Q8IY31	Q8IY31	Intraflagellar transport protein 20 homolog	IFT20	0.197418	0.233958	15.28	2.085	22.5511	22.2902	22.2601	22.8924	23.2059	23.5364	-1			2	2	2	92649000	8	2
Q8IY67	Q8IY67	Ribonucleoprotein PTB-binding 1	RAVER1	0.0496076	0.132291	63.876	17.602	22.7983	24.2288	25.2524	25.3861	25.2416	24.0743	-1			4	4	4	344380000	24	17
P38159;Q96E39;O75526;Q8N7X1	P38159;Q96E39;O75526	RNA-binding motif protein, X chromosome;RNA-binding motif protein, X chromosome, N-terminally processed;RNA binding motif protein, X-linked-like-1;RNA-binding motif protein, X-linked-like-2	RBMX;RBMXL1;RBMXL2	1.46323	-1.31729	42.331	13.428	27.0552	26.5627	27.415	25.9882	27.2012	25.1686	-1	+	BicD2_Trbo_RFP-Trbo	5	5	5	1240100000	33	47
Q8IYB1	Q8IYB1	Protein MB21D2	MB21D2	0.369891	-0.221958	55.8	48.519	27.6529	26.9144	27.0038	26.8729	26.8565	27.0599	-1			11	11	11	1202200000	32	70
Q8IYB3	Q8IYB3	Serine/arginine repetitive matrix protein 1	SRRM1	0.65731	-0.675062	102.33	26.063	26.4399	25.4989	27.02	26.2945	25.7492	25.3904	-1			5	5	5	731060000	51	33
Q8IYB5	Q8IYB5	Stromal membrane-associated protein 1	SMAP1	0.68865	-1.14423	50.386	19.711	27.7997	28.2067	28.3084	26.5945	27.8106	25.6848	-1			4	4	4	2235800000	12	46
Q8IYD1	Q8IYD1	Eukaryotic peptide chain release factor GTP-binding subunit ERF3B	GSPT2	0.288116	-0.119176	68.882	26.206	26.8352	26.9459	27.2825	27.0949	27.0137	26.7331	-1			19	7	7	1244500000	33	43
Q8IYT4	Q8IYT4	Katanin p60 ATPase-containing subunit A-like 2	KATNAL2	0.521048	-0.539133	61.252	2.7192	25.5119	24.8684	26.6598	25.8295	25.8283	25.6846	-1			1	1	1	707720000	34	15
Q8IZD4	Q8IZD4	mRNA-decapping enzyme 1B	DCP1B	1.24848	-0.409765	67.722	13.804	26.2028	25.5036	25.6986	25.5683	26.0426	25.6428	-1			5	5	5	603000000	34	20
Q8TF74	Q8TF74	WAS/WASL-interacting protein family member 2	WIPF2	3.43454	-1.32604	46.288	9.5422	26.698	25.3348	26.8097	25.6556	26.7544	25.2936	-1	+	BicD2_Trbo_RFP-Trbo	6	6	6	659720000	30	33
Q8IZL8	Q8IZL8	Proline-, glutamic acid- and leucine-rich protein 1	PELP1	0.660868	1.56346	119.7	6.199	21.3151	23.4491	24.6213	24.8526	22.4592	24.7843	-1			4	4	4	211560000	37	14
Q8IZT6	Q8IZT6	Abnormal spindle-like microcephaly-associated protein	ASPM	1.19513	1.89767	409.8	1.6244	22.0133	24.461	21.7402	22.1576	21.2289	24.0568	-1			2	2	2	40544000	221	2
P30626	P30626	Sorcin	SRI	1.37661	-1.32846	21.676	4.2817	23.8186	22.4975	24.8594	23.3461	24.6741	23.5231	-1	+	BicD2_Trbo_RFP-Trbo	3	3	3	159160000	12	8
Q8N0Z3	Q8N0Z3	Spindle and centriole-associated protein 1	SPICE1	0.645754	0.95358	96.263	4.8937	23.2239	23.5803	21.7105	23.9247	22.042	22.3322	-1			4	4	4	119780000	50	12
Q8N122	Q8N122	Regulatory-associated protein of mTOR	RPTOR	0.0526366	-0.122606	149.04	3.7428	23.7018	22.2834	24.3079	23.6624	22.2155	23.9115	-1			3	3	3	117950000	65	4
Q8N163	Q8N163	Cell cycle and apoptosis regulator protein 2	CCAR2	0.788904	-0.472697	102.9	59.977	27.9943	27.0901	28.156	27.9869	28.1329	27.7881	-1			20	20	20	2755400000	51	157
Q8N1F7	Q8N1F7	Nuclear pore complex protein Nup93	NUP93	0.6257	-0.305076	93.487	41.166	27.1263	27.0381	27.5803	27.2727	27.2093	26.6899	-1			16	16	16	1520000000	56	66
Q8N5M4	Q8N5M4	Tetratricopeptide repeat protein 9C	TTC9C	2.53034	-1.3297	20.012	2.9523	25.5497	24.3974	25.5962	24.5175	25.6098	23.8517	-1	+	BicD2_Trbo_RFP-Trbo	3	3	3	352600000	8	1
Q8N1G4	Q8N1G4	Leucine-rich repeat-containing protein 47	LRRC47	0.261192	-0.282112	63.472	32.506	27.0435	26.3052	27.6692	27.6271	27.2691	27.2032	-1			15	15	15	1809400000	32	75
Q8N1I0	Q8N1I0	Dedicator of cytokinesis protein 4	DOCK4	1.19944	1.0006	225.2	3.7896	22.3095	23.8387	22.8097	22.9385	21.8249	23.1685	-1			3	3	3	71090000	119	3
Q8N335	Q8N335	Glycerol-3-phosphate dehydrogenase 1-like protein	GPD1L	0.734969	0.391653	38.418	1.5844	22.5872	22.6463	22.8405	23.428	22.5425	23.0708	-1			1	1	1	60420000	24	1
Q5T0N5	Q5T0N5	Formin-binding protein 1-like	FNBP1L	2.34686	-1.33488	70.065	8.4588	25.7523	24.0928	25.4167	23.8521	25.1007	24.3202	-1	+	BicD2_Trbo_RFP-Trbo	4	4	4	262000000	37	14
Q93052	Q93052	Lipoma-preferred partner	LPP	2.08425	-1.3354	65.746	81.919	28.688	26.7317	28.655	27.3646	28.1996	27.4401	-1	+	BicD2_Trbo_RFP-Trbo	10	10	10	2471100000	22	95
Q96EY4	Q96EY4	Translation machinery-associated protein 16	TMA16	1.67905	-1.33665	23.864	2.7916	23.3112	22.5119	23.4338	21.8904	23.0063	21.3391	-1	+	BicD2_Trbo_RFP-Trbo	2	2	2	88866000	10	4
Q8N4H5	Q8N4H5	Mitochondrial import receptor subunit TOM5 homolog	TOMM5	0.322813	-0.674414	6.0352	1.8187	22.9448	21.2688	23.9996	23.6629	23.6773	23.6668	-1			2	2	2	108540000	5	11
Q8N543	Q8N543	Prolyl 3-hydroxylase OGFOD1	OGFOD1	0.547088	-1.47564	63.245	9.0856	24.1084	21.0976	24.5761	22.6274	24.618	25.1506	-1			2	2	2	122920000	26	8
Q8N5F7;Q5M9Q1	Q8N5F7	NF-kappa-B-activating protein	NKAP	1.2243	-1.21503	47.138	24.542	29.0972	27.7558	28.1336	27.3627	28.136	26.6031	-1			8	8	8	2017900000	18	48
Q8N5G2	Q8N5G2	Macoilin	TMEM57	0.583246	-0.990276	76.177	4.0809	22.8432	20.5704	23.0814	22.3947	23.1069	23.0955	-1			2	2	2	123100000	41	11
Q8N5K1	Q8N5K1	CDGSH iron-sulfur domain-containing protein 2	CISD2	0.255899	-0.18079	15.278	5.0212	25.3467	24.7366	25.1892	25.4896	24.9443	24.7116	-1			3	3	3	391400000	9	17
Q9NWS0	Q9NWS0	PIH1 domain-containing protein 1	PIH1D1	3.59039	-1.33762	32.363	64.853	28.1426	26.9038	28.2542	27.0621	28.4604	26.8784	-1	+	BicD2_Trbo_RFP-Trbo	9	9	9	1984300000	17	54
O95487	O95487	Protein transport protein Sec24B	SEC24B	1.59275	-1.33966	137.42	14.294	26.1996	24.6989	25.4297	23.9909	26.0904	25.0109	-1	+	BicD2_Trbo_RFP-Trbo	7	7	7	373620000	38	20
Q8N5M9	Q8N5M9	Protein jagunal homolog 1	JAGN1	0.229115	-0.635597	21.125	2.1038	21.2411	22.4952	24.5314	22.1817	24.1138	23.3026	-1			1	1	1	117390000	6	5
O60256	O60256	Phosphoribosyl pyrophosphate synthase-associated protein 2	PRPSAP2	1.32531	-1.34101	40.925	12.472	26.4041	24.1063	26.0328	25.0502	26.4196	25.6768	-1	+	BicD2_Trbo_RFP-Trbo	8	8	7	657130000	26	28
Q8N5W9	Q8N5W9	Filamin-interacting protein FAM101B	FAM101B	0.518939	-0.629412	22.882	3.5252	25.7497	25.0089	25.0937	23.6793	24.7452	25.0122	-1			3	3	3	306930000	7	12
Q8N684	Q8N684	Cleavage and polyadenylation specificity factor subunit 7	CPSF7	1.2241	-1.16161	52.049	2.255	24.6262	23.8362	25.6987	23.4241	24.3062	23.886	-1			4	4	4	232100000	24	11
Q8WZA0	Q8WZA0	Protein LZIC	LZIC	1.5436	-1.34107	21.494	20.118	26.0461	24.6215	26.9198	25.5019	26.0016	24.821	-1	+	BicD2_Trbo_RFP-Trbo	4	4	4	589940000	14	25
Q8NDI1	Q8NDI1	EH domain-binding protein 1	EHBP1	1.32664	-1.34235	140.02	18.325	27.6539	25.9213	26.2933	25.2593	27.2956	26.0351	-1	+	BicD2_Trbo_RFP-Trbo	14	14	12	944130000	74	24
Q5JVF3	Q5JVF3	PCI domain-containing protein 2	PCID2	1.66499	-1.3457	46.029	5.4104	23.639	22.3426	24.5961	23.1131	24.2483	22.9906	-1	+	BicD2_Trbo_RFP-Trbo	3	3	3	170380000	31	9
Q8N766	Q8N766	ER membrane protein complex subunit 1	EMC1	0.707983	-0.965441	111.76	9.1442	23.9102	22.1787	24.0432	23.7963	23.0722	22.1542	-1			4	4	4	144990000	55	6
Q8N7H5	Q8N7H5	RNA polymerase II-associated factor 1 homolog	PAF1	0.918288	-0.982674	59.975	8.1469	24.6718	22.4366	23.5382	23.2737	23.2365	22.7881	-1			2	2	2	122410000	36	5
Q9H6T3	Q9H6T3	RNA polymerase II-associated protein 3	RPAP3	4.50623	-1.34769	75.718	224.44	29.1385	27.764	29.0905	27.8643	29.0902	27.6477	-1	+	BicD2_Trbo_RFP-Trbo	21	21	21	3769400000	40	169
Q8N8Y2	Q8N8Y2	V-type proton ATPase subunit d 2	ATP6V0D2	0.774434	-1.33101	40.426	11.183	24.2593	23.7972	24.6348	21.5754	24.5112	24.0397	-1			1	1	1	168490000	18	12
Q8N983	Q8N983	39S ribosomal protein L43, mitochondrial	MRPL43	1.06975	-1.41314	23.431	2.3083	22.2598	19.8287	22.6465	21.8163	22.4281	21.45	-1			2	2	2	119430000	12	3
P08670;P41219;P17661;P07196;P07197	P08670	Vimentin	VIM	5.78458	-1.34983	53.651	323.31	32.813	31.5265	32.9062	31.5125	32.9016	31.5324	-1	+	BicD2_Trbo_RFP-Trbo	31	31	28	53488000000	33	748
Q8N9B5	Q8N9B5	Junction-mediating and -regulatory protein	JMY	0.649914	0.420853	111.44	20.906	26.0518	26.0775	25.8704	26.7044	25.4994	25.9023	-1			6	6	6	629110000	49	27
O00203	O00203	AP-3 complex subunit beta-1	AP3B1	3.63141	-1.35158	121.32	215.69	30.5914	28.9473	30.3776	29.1052	30.3073	29.169	-1	+	BicD2_Trbo_RFP-Trbo	33	33	25	9126300000	62	305
Q09161	Q09161	Nuclear cap-binding protein subunit 1	NCBP1	1.87885	-1.35198	91.838	30.134	27.7551	26.1086	28.2741	26.7501	27.9454	27.06	-1	+	BicD2_Trbo_RFP-Trbo	15	15	15	1717700000	38	86
Q8N9V2	Q8N9V2	Probable E3 ubiquitin-protein ligase TRIML1	TRIML1	0.149925	-0.392627	53.001	1.5832	23.1873	23.4641	22.7027	23.5804	22.9584	20.626	-1			1	1	1	83497000	24	1
Q8NAQ8	Q8NAQ8	Putative uncharacterized protein FLJ34945		0.266754	0.694845	14.167	1.7404	21.4098	24.1586	23.3887	23.1278	24.7502	24.3469	-1			1	1	1	255490000	8	6
Q8NB46	Q8NB46	Serine/threonine-protein phosphatase 6 regulatory ankyrin repeat subunit C	ANKRD52	0.376215	0.182565	115.08	8.4439	24.6254	25.1249	24.6952	24.8151	25.1861	25.1145	-1			7	7	7	423030000	39	12
Q8NBJ4	Q8NBJ4	Golgi membrane protein 1	GOLM1	0.865877	-2.52708	45.333	3.6325	30.4701	26.2885	30.4072	26.6375	26.3881	26.7581	-1			1	1	1	9261000000	29	18
Q8NBJ5	Q8NBJ5	Procollagen galactosyltransferase 1	COLGALT1	0.420918	0.685101	71.635	1.6315	22.7897	23.8828	24.7192	24.6579	22.8071	23.8306	-1			3	3	3	166150000	39	3
Q8NBS9	Q8NBS9	Thioredoxin domain-containing protein 5	TXNDC5	0.871192	-0.69614	47.628	41.325	26.8398	25.6479	27.2794	26.7811	26.9716	26.5734	-1			7	7	7	1305000000	25	48
Q8NBT2	Q8NBT2	Kinetochore protein Spc24	SPC24	0.965199	-1.52889	22.478	27.792	24.7508	23.2781	25.6223	22.3918	24.5645	24.6809	-1			3	3	3	373650000	14	21
Q8NBU5	Q8NBU5	ATPase family AAA domain-containing protein 1	ATAD1	0.189279	-0.373425	40.744	7.192	22.8163	23.8454	25.0738	23.9092	25.0676	24.0829	-1			6	6	6	271360000	19	9
O15042	O15042	U2 snRNP-associated SURP motif-containing protein	U2SURP	2.73993	-1.35306	118.29	23.037	27.3636	25.9142	26.9787	25.8847	27.0077	25.4919	-1	+	BicD2_Trbo_RFP-Trbo	12	12	12	1216000000	45	39
Q8NC56	Q8NC56	LEM domain-containing protein 2	LEMD2	0.826814	-1.47832	56.974	5.0007	23.0651	22.0936	24.384	23.5103	25.5533	22.9636	-1			5	5	5	208450000	32	12
Q9UBC2	Q9UBC2	Epidermal growth factor receptor substrate 15-like 1	EPS15L1	3.38372	-1.35467	94.254	323.31	30.2217	28.6988	30.3648	28.878	30.0719	29.0176	-1	+	BicD2_Trbo_RFP-Trbo	32	32	32	7974200000	52	272
Q8NCW5	Q8NCW5	NAD(P)H-hydrate epimerase	APOA1BP	0.0352209	0.0470409	31.674	8.7695	25.7618	25.1987	25.8939	25.5677	24.527	25.5575	-1			4	4	4	554730000	16	38
Q8NCY6	Q8NCY6	Myb/SANT-like DNA-binding domain-containing protein 4	MSANTD4	0.516166	-1.08002	41.149	1.9468	24.441	22.2653	25.5527	24.9531	25.1738	24.709	-1			1	1	1	292890000	16	8
Q8ND04	Q8ND04	Protein SMG8	SMG8	1.01211	-0.559224	109.68	9.3354	26.5759	25.4724	26.3219	25.7687	25.7579	25.7369	-1			8	8	8	538990000	58	19
Q8ND24	Q8ND24	RING finger protein 214	RNF214	1.06185	1.00717	77.667	14.689	24.2122	25.2065	23.0765	24.7818	24.4389	24.7609	-1			6	6	6	309520000	39	17
P04637	P04637	Cellular tumor antigen p53	TP53	1.89787	-1.35487	43.653	45.491	27.9727	26.563	27.5031	25.8592	27.8146	26.8035	-1	+	BicD2_Trbo_RFP-Trbo	9	9	9	1728200000	25	79
Q8ND76;Q8N7R7;Q5T2Q4	Q8ND76;Q8N7R7	Cyclin-Y;Cyclin-Y-like protein 1	CCNY;CCNYL1	1.21477	-2.50851	39.336	4.6155	26.7801	22.0442	24.6806	22.3486	23.7643	23.3066	-1			4	4	4	294550000	23	9
Q8ND83	Q8ND83	SLAIN motif-containing protein 1	SLAIN1	0.0603554	0.155307	60.594	1.5906	24.948	24.3947	22.4453	24.1153	25.2166	24.5658	-1			2	2	2	178480000	26	5
Q8NDC0	Q8NDC0	MAPK-interacting and spindle-stabilizing protein-like	MAPK1IP1L	0.632232	-0.522607	24.269	8.8324	24.3762	23.7824	25.2979	24.5933	24.7988	24.5294	-1			1	1	1	285990000	1	11
Q12800;Q9NZI7	Q12800	Alpha-globin transcription factor CP2	TFCP2	1.53234	-1.35572	57.255	11.248	25.6477	23.5246	25.769	24.863	25.3438	24.3058	-1	+	BicD2_Trbo_RFP-Trbo	5	5	5	352130000	23	14
Q8NDV7	Q8NDV7	Trinucleotide repeat-containing gene 6A protein	TNRC6A	0.955931	0.128998	210.29	180.62	28.7431	28.8881	28.8517	29.0454	28.8823	28.9306	-1			30	30	29	5821100000	79	241
O00401	O00401	Neural Wiskott-Aldrich syndrome protein	WASL	2.52219	-1.35929	54.826	60.069	28.2143	27.4356	28.5876	26.9695	28.5472	26.8662	-1	+	BicD2_Trbo_RFP-Trbo	13	13	13	2345200000	25	83
O00429	O00429	Dynamin-1-like protein	DNM1L	3.61578	-1.36381	81.876	92.021	29.4679	27.9702	29.6017	28.3039	29.4268	28.1309	-1	+	BicD2_Trbo_RFP-Trbo	26	26	26	4739100000	52	193
Q8NEH6	Q8NEH6	Meiosis-specific nuclear structural protein 1	MNS1	0.55911	2.43952	60.571	2.7934	21.9885	21.5272	21.1768	27.5936	23.8578	25.2209	-1			2	2	2	365480000	38	4
Q8NEL9	Q8NEL9	Phospholipase DDHD1	DDHD1	0.399763	1.62425	100.43	1.674	23.7228	23.4	23.7894	23.3127	22.7405	28.4128	-1			2	2	2	1834400000	46	8
Q9UKY7	Q9UKY7	Protein CDV3 homolog	CDV3	1.63037	-1.37432	27.335	29.16	27.6201	25.5667	27.9068	26.7176	27.3388	26.4584	-1	+	BicD2_Trbo_RFP-Trbo	5	5	5	1205400000	12	39
Q8NEY1	Q8NEY1	Neuron navigator 1	NAV1	0.491232	-0.985901	202.47	4.9318	23.8604	21.9443	25.1093	22.9876	23.1549	24.235	-1			3	3	3	197550000	108	11
Q9H2P9	Q9H2P9	Diphthine synthase	DPH5	2.02667	-1.37678	31.651	4.974	25.0339	23.4438	25.601	24.1814	25.2894	24.1688	-1	+	BicD2_Trbo_RFP-Trbo	4	4	4	309700000	17	5
Q5JSZ5	Q5JSZ5	Protein PRRC2B	PRRC2B	2.2251	-1.37787	242.96	21.883	27.1838	25.556	26.7867	25.1212	26.4933	25.6529	-1	+	BicD2_Trbo_RFP-Trbo	17	15	15	782730000	115	25
Q8NFJ5	Q8NFJ5	Retinoic acid-induced protein 3	GPRC5A	0.212702	-0.248126	40.251	3.6787	25.5323	24.2867	24.2548	25.0824	25.2155	24.8891	-1			2	2	2	250800000	9	11
Q3YEC7	Q3YEC7	Rab-like protein 6	RABL6	2.60806	-1.37809	79.548	39.156	27.9605	26.8834	28.087	26.2275	27.898	26.7003	-1	+	BicD2_Trbo_RFP-Trbo	13	13	13	1568800000	33	62
Q8NG31	Q8NG31	Protein CASC5	CASC5	0.137896	-0.305789	265.39	7.5873	25.9185	25.1338	25.893	23.9784	24.0769	25.8588	-1			6	6	6	551290000	132	8
Q8NHV4	Q8NHV4	Protein NEDD1	NEDD1	0.206553	-0.135427	71.965	17.122	25.5281	25.7405	25.9136	25.5739	26.2884	26.0093	-1			10	10	10	809670000	35	27
Q8NI27	Q8NI27	THO complex subunit 2	THOC2	0.00204986	-0.00549062	182.77	7.5155	25.3744	24.4092	22.8686	24.3422	25.4771	24.9523	-1			6	6	6	262710000	85	14
Q8NI35	Q8NI35	InaD-like protein	INADL	1.08481	-1.21675	196.37	8.3131	24.2544	22.8535	24.8243	24.3744	24.7097	22.9103	-1			5	5	5	209480000	90	6
Q8NI60	Q8NI60	Atypical kinase ADCK3, mitochondrial	ADCK3	0.296571	-0.533803	71.949	3.0246	22.8707	24.0154	23.2262	21.9225	24.2236	22.7812	-1			2	2	2	113010000	28	2
Q9Y6E0	Q9Y6E0	Serine/threonine-protein kinase 24;Serine/threonine-protein kinase 24 36 kDa subunit;Serine/threonine-protein kinase 24 12 kDa subunit	STK24	2.49065	-1.38917	49.307	2.3049	23.2829	21.9923	23.5721	21.9602	22.9126	21.6476	-1	+	BicD2_Trbo_RFP-Trbo	4	2	2	22677000	22	3
Q8TAD7	Q8TAD7	Overexpressed in colon carcinoma 1 protein	OCC1	0.692699	-0.602397	6.4069	2.2229	22.3479	21.2956	22.418	21.3944	22.2527	22.5214	-1			1	1	1	30187000	3	3
Q8TAG9	Q8TAG9	Exocyst complex component 6	EXOC6	0.660911	-0.598481	93.721	2.564	22.7358	22.3937	23.943	23.1184	23.2473	22.6185	-1			1	1	1	84387000	53	3
Q8TAP8	Q8TAP8	Protein phosphatase 1 regulatory subunit 35	PPP1R35	0.693078	1.17423	27.953	2.5531	24.2178	25.6285	22.7136	24.044	24.6562	25.4378	-1			2	2	2	370210000	13	14
Q8TAQ2	Q8TAQ2	SWI/SNF complex subunit SMARCC2	SMARCC2	0.524952	0.483248	132.88	6.7612	22.9082	24.0054	23.7636	24.3384	24.2414	24.0192	-1			4	4	1	199740000	54	11
Q8TAT6	Q8TAT6	Nuclear protein localization protein 4 homolog	NPLOC4	0.75471	-1.47848	68.119	5.126	24.0646	21.8512	24.9438	22.6626	24.6855	24.7447	-1			3	3	3	272830000	33	14
Q8TBA6	Q8TBA6	Golgin subfamily A member 5	GOLGA5	0.577805	-1.25068	83.023	2.0435	23.8406	23.4397	23.8654	23.6596	23.8091	20.6637	-1			1	1	1	54934000	47	2
Q9H1I8	Q9H1I8	Activating signal cointegrator 1 complex subunit 2	ASCC2	3.07233	-1.39169	86.359	275.12	30.8312	29.123	30.8087	29.4812	30.7846	29.6451	-1	+	BicD2_Trbo_RFP-Trbo	21	21	21	13955000000	30	341
Q8TBC4	Q8TBC4	NEDD8-activating enzyme E1 catalytic subunit	UBA3	1.03736	-1.3231	51.852	5.8186	24.5764	21.9591	24.0649	23.835	23.7524	22.6303	-1			4	4	4	280140000	26	10
Q13247	Q13247	Serine/arginine-rich splicing factor 6	SRSF6	2.08307	-1.39322	39.586	26.343	27.704	26.2131	28.3147	26.5082	27.8498	26.9674	-1	+	BicD2_Trbo_RFP-Trbo	8	8	4	1968100000	21	57
Q8TCG1	Q8TCG1	Protein CIP2A	KIAA1524	0.197225	-0.148387	102.18	11.3	25.0194	24.9564	25.7159	24.9085	25.0307	25.4559	-1			10	10	10	490120000	65	24
Q8TCJ2	Q8TCJ2	Dolichyl-diphosphooligosaccharide--protein glycosyltransferase subunit STT3B	STT3B	0.0932358	-0.158021	93.673	2.4975	23.198	22.1108	23.2677	24.196	23.3604	23.0453	-1			3	2	2	123060000	37	4
Q8TCS8	Q8TCS8	Polyribonucleotide nucleotidyltransferase 1, mitochondrial	PNPT1	0.047628	0.10377	85.95	2.5546	21.9525	21.83	23.5644	23.2457	23.0091	23.7616	-1			2	2	2	109950000	51	4
Q8TCT9	Q8TCT9	Minor histocompatibility antigen H13	HM13	0.205329	-0.259227	41.488	5.3333	24.1892	24.2519	25.4631	25.1207	25.3886	24.8906	-1			3	3	3	320200000	15	14
Q8TCU4	Q8TCU4	Alstrom syndrome protein 1	ALMS1	1.11691	1.27446	461.06	77.812	25.7421	26.5231	25.9534	26.5868	24.2529	26.6619	-1			33	33	33	1550200000	225	67
Q16629	Q16629	Serine/arginine-rich splicing factor 7	SRSF7	2.58551	-1.39566	27.366	10.299	27.7249	26.3923	27.9679	26.0432	27.5741	26.6443	-1	+	BicD2_Trbo_RFP-Trbo	3	2	2	1558500000	16	33
Q9H0E2	Q9H0E2	Toll-interacting protein	TOLLIP	1.58163	-1.39636	30.281	1.6569	23.6649	21.1564	22.7074	22.0402	23.0427	22.0293	-1	+	BicD2_Trbo_RFP-Trbo	2	2	2	49942000	16	7
Q8TD31	Q8TD31	Coiled-coil alpha-helical rod protein 1	CCHCR1	0.168135	0.475919	88.67	4.0522	21.3427	24.6968	22.7324	22.4213	23.7028	22.0876	-1			4	4	4	106560000	54	8
Q8TDD1	Q8TDD1	ATP-dependent RNA helicase DDX54	DDX54	1.24657	-2.04744	98.594	4.6227	23.7516	20.9035	24.3801	21.3797	23.5949	23.3012	-1			4	4	4	95788000	52	7
Q8TDN6	Q8TDN6	Ribosome biogenesis protein BRX1 homolog	BRIX1	0.75052	-0.251601	41.401	11.479	26.0325	25.5982	25.9975	25.8668	26.2462	26.0565	-1			7	7	7	726310000	19	26
Q04637;REV__Q8NEG2	Q04637	Eukaryotic translation initiation factor 4 gamma 1	EIF4G1	3.21144	-1.39707	175.49	323.31	32.4232	30.7239	32.4144	31.1892	32.3557	31.089	-1	+	BicD2_Trbo_RFP-Trbo	42	42	36	36415000000	72	754
Q8TE02	Q8TE02	Elongator complex protein 5	ELP5	1.18265	-1.10355	34.841	9.6346	26.1132	25.012	25.5463	23.9539	25.9037	25.2867	-1			3	3	3	371430000	11	16
Q8TED0	Q8TED0	U3 small nucleolar RNA-associated protein 15 homolog	UTP15	0.353548	-0.881649	58.414	1.6158	21.9632	23.3317	22.1437	21.5272	24.1539	20.757	-1			2	2	2	68726000	34	4
Q8TEM1	Q8TEM1	Nuclear pore membrane glycoprotein 210	NUP210	0.084564	0.084233	205.11	6.7991	22.5694	22.4853	23.2967	22.8313	22.5592	23.3615	-1			3	3	3	114180000	77	6
Q8TEP8	Q8TEP8	Centrosomal protein of 192 kDa	CEP192	0.0376489	-0.113153	279.11	10.02	24.1033	25.426	24.2153	24.4456	23.9031	22.0107	-1			9	9	9	344820000	124	13
Q8TEQ6	Q8TEQ6	Gem-associated protein 5	GEMIN5	0.371655	0.352708	168.59	33.91	26.2259	26.345	26.6523	27.5266	26.924	26.9887	-1			20	20	20	1269700000	90	51
Q8TEU7;Q9Y4G8	Q8TEU7	Rap guanine nucleotide exchange factor 6	RAPGEF6	0.985045	-0.51837	179.42	8.6776	26.3447	25.687	25.6486	25.5383	25.9904	25.2032	-1			9	9	9	473350000	88	21
P84090	P84090	Enhancer of rudimentary homolog	ERH	2.78225	-1.39836	12.259	91.815	28.0066	26.5483	28.4619	26.93	28.0571	26.8523	-1	+	BicD2_Trbo_RFP-Trbo	3	3	3	2072000000	6	45
Q8TEX9	Q8TEX9	Importin-4	IPO4	0.173293	-0.134007	118.71	33.905	26.7703	26.513	27.3692	26.7345	26.7201	27.21	-1			16	16	16	1436000000	53	67
Q8TF46	Q8TF46	DIS3-like exonuclease 1	DIS3L	0.675694	-1.51554	120.79	5.3088	24.1236	24.9442	26.004	22.6742	24.3338	22.2963	-1			5	5	5	315270000	63	6
Q8TF65	Q8TF65	PDZ domain-containing protein GIPC2	GIPC2	0.55196	-0.476908	34.354	8.8745	24.1013	23.3373	24.8933	24.1758	24.0455	24.0964	-1			1	1	1	225400000	13	14
Q8TF72;Q9ULL8;Q13796	Q8TF72	Protein Shroom3	SHROOM3	0.189234	-0.25635	216.85	18.775	26.6911	26.5493	26.4649	26.2737	25.6437	25.2077	-1			14	14	14	838160000	116	30
O00273	O00273	DNA fragmentation factor subunit alpha	DFFA	1.55069	-1.40177	36.521	10.205	25.8003	24.1197	26.687	25.0752	25.7837	24.8707	-1	+	BicD2_Trbo_RFP-Trbo	7	7	7	629530000	20	24
Q8WTW3	Q8WTW3	Conserved oligomeric Golgi complex subunit 1	COG1	0.0866067	0.136709	108.98	2.904	23.578	23.3811	22.8909	24.4632	24.397	23.4316	-1			4	4	4	159520000	62	6
Q8WU76	Q8WU76	Sec1 family domain-containing protein 2	SCFD2	0.62736	-0.418626	75.126	2.2542	22.9061	21.9338	22.9679	22.9381	22.9188	22.665	-1			1	1	1	67927000	33	5
Q8WU79	Q8WU79	Stromal membrane-associated protein 2	SMAP2	1.203	-1.50303	46.785	4.9495	25.2972	22.7982	25.6766	24.6915	24.971	23.9461	-1			5	5	5	274270000	17	11
Q8WU90	Q8WU90	Zinc finger CCCH domain-containing protein 15	ZC3H15	0.612485	-0.496682	48.602	26.348	25.4796	24.3852	25.0728	25.307	25.8292	25.1994	-1			5	5	5	337540000	29	22
Q8WUA2	Q8WUA2	Peptidyl-prolyl cis-trans isomerase-like 4	PPIL4	0.66164	-1.1792	57.224	5.5226	25.2591	22.656	25.7148	25.2814	25.089	24.5881	-1			4	4	4	357580000	28	13
Q8WUH6	Q8WUH6	Transmembrane protein 263	TMEM263	1.2467	-0.859294	11.748	5.6411	25.6491	24.746	26.4954	25.2372	25.6967	25.2802	-1			2	2	2	491760000	9	10
Q15018	Q15018	BRISC complex subunit Abro1	FAM175B	2.22258	-1.40413	46.9	47.956	27.623	25.4983	27.1644	26.1942	27.0993	25.9819	-1	+	BicD2_Trbo_RFP-Trbo	9	9	9	997620000	18	44
Q8WUM4	Q8WUM4	Programmed cell death 6-interacting protein	PDCD6IP	0.469601	-0.486888	96.022	51.72	27.0533	26.1552	27.8999	27.2506	26.9889	27.0756	-1			19	19	19	1819100000	54	90
Q8WUW1	Q8WUW1	Protein BRICK1	BRK1	0.685677	-1.35928	8.7448	2.2395	24.0613	21.8919	25.2933	24.7104	24.9849	23.6593	-1			3	3	3	215630000	7	2
Q15545	Q15545	Transcription initiation factor TFIID subunit 7	TAF7	1.30279	-1.40518	40.259	9.2507	25.1609	24.9607	26.7233	24.5822	26.5316	24.6574	-1	+	BicD2_Trbo_RFP-Trbo	6	6	6	491300000	20	23
Q8WUY1	Q8WUY1	Protein THEM6	THEM6	0.29337	0.499574	23.865	3.9566	23.8073	24.3507	23.2018	22.546	22.9645	24.5755	-1			3	3	3	158180000	16	5
Q8WVJ2	Q8WVJ2	NudC domain-containing protein 2	NUDCD2	1.29683	-0.864328	17.676	7.9223	25.3416	24.002	25.6537	24.9436	25.1472	24.604	-1			2	2	2	306710000	7	12
Q8WVK7	Q8WVK7	Spindle and kinetochore-associated protein 2	SKA2	1.06341	-0.939482	14.188	20.349	26.4007	24.6225	25.2652	24.5951	25.0749	24.7047	-1			2	2	2	406770000	14	22
Q8WVM8	Q8WVM8	Sec1 family domain-containing protein 1	SCFD1	0.83905	-0.464613	72.379	21.058	26.2609	25.5842	26.4719	26.4064	26.5916	25.9399	-1			10	10	10	814690000	36	35
Q8WVV9	Q8WVV9	Heterogeneous nuclear ribonucleoprotein L-like	HNRNPLL	0.444213	-0.928613	60.082	3.7743	21.805	22.4274	24.505	21.3304	23.0499	22.8162	-1			3	2	2	60013000	33	3
Q8WVX9	Q8WVX9	Fatty acyl-CoA reductase 1	FAR1	0.0886449	0.122714	59.356	1.8754	24.0576	23.3525	22.712	24.1088	24.0098	23.6863	-1			2	2	2	148340000	30	3
Q8WVY7	Q8WVY7	Ubiquitin-like domain-containing CTD phosphatase 1	UBLCP1	0.410845	-0.688504	36.804	4.1108	24.734	23.5285	25.9164	25.3493	24.3761	24.0832	-1			4	4	4	352470000	18	6
Q8WW12	Q8WW12	PEST proteolytic signal-containing nuclear protein	PCNP	0.77368	-1.20033	18.925	2.3866	23.738	21.3087	24.204	23.3848	23.7791	23.4265	-1			2	2	2	142980000	12	11
Q8WW22	Q8WW22	DnaJ homolog subfamily A member 4	DNAJA4	0.636202	1.26708	44.797	4.1009	24.4978	24.14	22.0104	23.9057	21.6523	23.916	-1			2	2	2	241630000	24	9
Q8WWC4	Q8WWC4	Uncharacterized protein C2orf47, mitochondrial	C2orf47	1.08241	-1.44465	32.544	3.8057	24.4427	22.4981	22.8412	22.9926	24.258	21.7173	-1			4	4	4	139820000	23	8
Q8N4C8	Q8N4C8	Misshapen-like kinase 1	MINK1	3.18598	-1.41079	149.82	32.458	28.403	26.6728	28.3421	27.0133	28.3362	27.1629	-1	+	BicD2_Trbo_RFP-Trbo	15	15	8	2124700000	69	101
Q6WKZ4	Q6WKZ4	Rab11 family-interacting protein 1	RAB11FIP1	1.95824	-1.41123	137.17	77.987	28.3229	26.5214	28.604	27.3744	28.6534	27.4507	-1	+	BicD2_Trbo_RFP-Trbo	18	18	17	2165700000	59	83
P49795	P49795	Regulator of G-protein signaling 19	RGS19	1.31545	-1.41903	24.635	1.5774	23.303	21.5538	23.8119	21.7415	23.5256	23.0882	-1	+	BicD2_Trbo_RFP-Trbo	1	1	1	85609000	13	3
Q8WWW0	Q8WWW0	Ras association domain-containing protein 5	RASSF5	0.687859	-0.25094	47.09	14.326	26.2036	25.6543	26.0537	26.0853	26.3307	26.0957	-1			5	5	5	691370000	25	38
Q9NQX4	Q9NQX4	Unconventional myosin-Vc	MYO5C	1.45028	-1.42008	202.81	59.319	26.1789	25.267	25.8025	24.9981	26.4588	23.915	-1	+	BicD2_Trbo_RFP-Trbo	30	24	24	1248800000	120	80
[truncated: 821 more rows]
